# Supplementary material for: Diastereoselective synthesis of CF3-oxazinoquinolines in water
Source: Royal Society of Chemistry journal article supplement (doi:10.1039/c9gc03044a), 2019-01-01
Supplement: c9gc03044a1.pdf [file c9gc03044a1.pdf]

## Supporting Information

### Diastereoselective synthesis of CF<sub>3</sub>-oxazinoquinolines in water

Vasiliy M. Muzalevskiy<sup>a</sup>, Kseniya V. Belyaeva<sup>b</sup>, Boris A. Trofimov<sup>\*b</sup>, Valentine G. Nenajdenko<sup>\*a</sup>

<sup>a</sup>*M. V. Lomonosov Moscow State University, Department of Chemistry, Leninskie Gory 1, Moscow, 119991 Russian Federation*

<sup>b</sup>*A. E. Favorsky Irkutsk Institute of Chemistry, Siberian Branch, Russian Academy of Sciences, 1 Favorsky Str., Irkutsk, 664033*

*Russian Federation; Fax: (395-2)41-93-46*

#### Table of contents

|                                                                                                                                                                   |         |
|-------------------------------------------------------------------------------------------------------------------------------------------------------------------|---------|
| General remarks                                                                                                                                                   | S2      |
| Reaction of CF <sub>3</sub> -ynones and quinolines in water (general procedure)                                                                                   | S2      |
| Characterization data of CF <sub>3</sub> -oxazinoquinolines 3                                                                                                     | S2-S8   |
| Epimerization of (3 <i>R</i> *,4 <i>aR</i> )-1-phenyl-3-(trifluoromethyl)-3 <i>H</i> ,4 <i>aH</i> -[1,3]oxazino[3,2- <i>a</i> ]quinolin-3-ol (3a)                 | S8      |
| (3 <i>R</i> *,4 <i>aR</i> *)-3-Ethoxy-1-phenyl-3-(trifluoromethyl)-3 <i>H</i> ,4 <i>aH</i> -[1,3]oxazino[3,2- <i>a</i> ]quinoline (4)                             | S8      |
| Reaction of oxazine (3a) with methyl 2-mercaptoacetate                                                                                                            | S9      |
| Transformation of oxazine (3a) into 2-phenylquinoline (6)                                                                                                         | S9      |
| Transformation of oxazine (3a) into 2,2,2-trifluoro-1-(2-phenylquinolin-3-yl)ethanone (7)                                                                         | S10     |
| Hydrogenation of (3 <i>R</i> *,4 <i>aR</i> )-1-phenyl-3-(trifluoromethyl)-3 <i>H</i> ,4 <i>aH</i> -[1,3]oxazino[3,2- <i>a</i> ]quinolin-3-ol (3a) to form 8 and 9 | S11     |
| Hydrogenation of (3 <i>R</i> *,4 <i>aR</i> )-1-phenyl-3-(trifluoromethyl)-3 <i>H</i> ,4 <i>aH</i> -[1,3]oxazino[3,2- <i>a</i> ]quinolin-3-ol (3a) to form 11      | S11     |
| Copies of all NMR spectra                                                                                                                                         | S13-S83 |

**General remarks.**  $^1\text{H}$ ,  $^{13}\text{C}$  and  $^{19}\text{F}$  NMR spectra were recorded on Bruker AVANCE 400 MHz spectrometer in  $\text{CD}_3\text{CN}$  and  $\text{CDCl}_3$  at 400, 100 and 376 MHz respectively. Chemical shifts ( $\delta$ ) in ppm are reported with the use of the residual  $\text{CHD}_2\text{CN}$  and chloroform signals (1.94 and 7.25 for  $^1\text{H}$  and 77.0 for  $^{13}\text{C}$ ) as internal reference. The  $^{19}\text{F}$  chemical shifts were referenced to  $\text{C}_6\text{F}_6$ , (-162.9 ppm). HRMS (ESI-TOF) spectra were measured with an Orbitrap Elite instrument. TLC analysis was performed on “Merck 60  $\text{F}_{254}$ ” plates. All reagents were of reagent grade and were used as such or distilled prior to use.  $\text{CF}_3$ -ynones **2** were prepared as reported previously<sup>1</sup>. Melting points were determined on an Electrothermal 9100 apparatus. The NMR and m.p. data of compounds **3** (with the exception of **3i,j,k,n**, which is a new compound) are in agreement with those in the literature<sup>2</sup>.

**Reaction of  $\text{CF}_3$ -ynones and quinolines in water (general procedure):** A 4 mL vial with a screw cap was charged with water (0.5 mL), quinoline **1** (0.475 mmol, 0.95 equiv.) and then  $\text{CF}_3$ -ynone **2** (0.5 mmol, 1 equiv.) was added at vigorous stirring. The reaction mixture was stirred at room temperature for 1-2 h (TLC or  $^{19}\text{F}$  NMR control; 24 h for quinoline **1c** and for ketone **2i**). Excess water was decanted; the residue was dissolved in ethyl acetate (0.5 mL) and dried over  $\text{Na}_2\text{SO}_4$  (directly in the reaction vial). The solution was transferred into a round bottomed flask and the product crystallized by addition of appropriate amount of heptane (2-3 mL). The mother liquor was decanted, the crude product was dried under reduced pressure to give pure (3*R*\*,4*aR*\*)-isomer of **3**.

**(3*R*\*,4*aR*\*)-1-Phenyl-3-(trifluoromethyl)-3*H*,4*aH*-[1,3]oxazino[3,2-*a*]-quinolin-3-ol (**3a**).** Obtained from

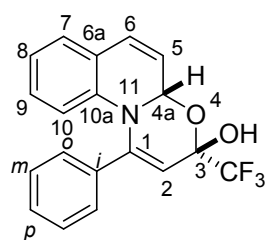

quinoline **1a** (0.061 g, 0.475 mmol) and acetylene **2a** (0.099 g, 0.5 mmol). White powder, m.p. 154-156 °C (heptane), yield 0.153 g (93%). For multi gram scale reaction (60 equivalents of water): compound **3a** was obtained from quinoline **1a** (0.613 g, 4.75 mmol), water (5 mL) and acetylene **2a** (0.995 g, 5 mmol). Ethyl acetate (2.5 mL) and heptane (8 mL) were used for isolation of **3a**. White powder, m.p. 154-

156 °C (heptane), yield 1.480 g (90%). Calculation of E-factor for multi gram scale reaction (60 equiv.):  $E = [m(\text{EtOAc}) + m(\text{heptane}) + m(\text{water}) + m(\text{Na}_2\text{SO}_4) + m(\mathbf{1a}) + m(\mathbf{2a})] / m(\mathbf{3a}) = (2.25 + 5.44 + 5 + 0.30 + 0.613 + 0.995) / 1.480 = 9.86$ . For multi gram scale reaction (3 equivalents of water): compound **3a** was obtained from quinoline **1a** (1.612 g, 12.5 mmol), water (0.675 mL) and acetylene **2a** (2.612 g, 13.1 mmol). Ethyl acetate (6 mL) and heptane (20 mL) were used for first crystallization. For purification of material obtained from the mother liquor ethyl acetate (2.5 mL) and heptane (8 mL) were used. White powder, m.p. 154-156 °C (heptane), yield 3.878 g (90%). Calculation of E-factor for multi gram scale reaction (3 equiv.):

<sup>1</sup> V. M. Muzalevskiy, A. Yu. Rulev, A. R. Romanov, E. V. Kondrashov, I. A. Ushakov, V. A. Chertkov and V. G. Nenajdenko, *J. Org. Chem.*, 2017, **82**, 7200.

<sup>2</sup> B. A. Trofimov, K. V. Belyaeva, L. P. Nikitina, A. V. Afonin, A. V. Vashchenko, V. M. Muzalevskiy and V. G. Nenajdenko, *Chem. Commun.*, 2018, **54**, 2268.

$E = [m(\text{EtOAc}) + m(\text{heptane}) + m(\text{water}) + m(\text{Na}_2\text{SO}_4) + m(\mathbf{1a}) + m(\mathbf{2a})] / m(\mathbf{3a}) = (7.667 + 19.152 + 0.675 + 0.70 + 1.613 + 2.612) / 3.878 = 8.36$ . Calculation of E-factor (approximate value) for the reaction in  $\text{MeCN}^2$ :  $E = [m(\text{MeCN}) + m(\text{water}) + m(\mathbf{1a}) + m(\mathbf{2a}) + m(\text{Sicagel}) + m(\text{eluent})] / m(\mathbf{3a}) = (2.37 + 0.009 + 0.061 + 0.099 + 25.0 + 266 \dots 399 \text{ (~200-300 mL of eluent was used)}) / 0.148 = 1983 \dots 2867 \sim 2000-3000$ .

$^1\text{H NMR}$  (400.13 MHz,  $\text{CD}_3\text{CN}$ ):  $\delta$  7.56-7.54 (m, 2H,  $\text{H}_o$  from Ph), 7.47-7.39 (m, 3H,  $\text{H}_{m,p}$  from Ph), 7.25 (dd,  $^3J = 7.1$  Hz,  $^4J = 1.9$  Hz, 1H, H-7), 7.01 (d,  $^3J_{5,6} = 9.8$  Hz, 1H, H-6), 6.90 (td,  $^3J = 7.4$  Hz,  $^4J = 1.8$  Hz, 1H, H-9), 6.85 (td,  $^3J = 7.3$  Hz,  $^4J = 1.2$  Hz, 1H, H-8), 6.31 (d,  $^3J = 7.8$  Hz, 1H, H-10), 6.12 (dd,  $^3J_{5,6} = 9.8$  Hz,  $^3J_{4a,5} = 4.8$  Hz, 1H, H-5), 6.03 (s, 1H, H-2), 5.66 (d,  $^3J_{4a,5} = 4.8$  Hz, 1H, H-4a), 5.55 (s, 1H, OH) ppm.

$^{19}\text{F NMR}$  (376.50 MHz,  $\text{CD}_3\text{CN}$ ):  $\delta$  -82.0 ( $\text{CF}_3$ ) ppm.

$^1\text{H NMR}$  (400.13 MHz,  $\text{CDCl}_3$ ):  $\delta$  7.54-7.52 (m, 2H,  $\text{H}_o$  from Ph), 7.43-7.35 (m, 3H,  $\text{H}_{m,p}$  from Ph), 7.18 (dd,  $^3J = 7.2$  Hz,  $^4J = 0.8$  Hz, 1H, H-7), 6.95 (d,  $^3J_{5,6} = 9.7$  Hz, 1H, H-6), 6.90 (td,  $^3J = 7.7$  Hz,  $^4J = 1.1$  Hz, 1H, H-9), 6.84 (t,  $^3J = 7.2$  Hz, 1H, H-8), 6.33 (d,  $^3J = 8.1$  Hz, 1H, H-10), 6.04 (dd,  $^3J_{5,6} = 9.7$  Hz,  $^3J_{4a,5} = 4.8$  Hz, 1H, H-5), 5.97 (s, 1H, H-2), 5.68 (d,  $^3J_{4a,5} = 4.8$  Hz, 1H, H-4a), 3.19 (s, 1H, OH) ppm.

**(3*R*\*,4*aR*\*)-1-(4-Methylphenyl)-3-(trifluoromethyl)-3*H*,4*aH*-[1,3]oxazino[3,2-*a*]quinolin-3-ol (3b)**

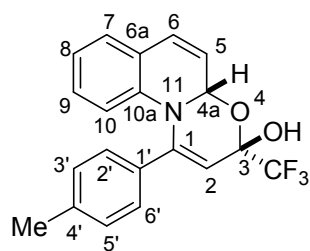

Obtained from quinoline **1a** (0.061 g, 0.475 mmol) and acetylene **2b** (0.106 g, 0.5 mmol). Light-brown powder, m.p. 132-134 °C (heptane),  $R_F(\text{CH}_2\text{Cl}_2\text{-MeOH } 100:1) = 0.27$ , yield 0.163 g (96%).

$^1\text{H NMR}$  (400.1 MHz,  $\text{CD}_3\text{CN}$ ):  $\delta$  7.43 (d,  $^3J = 8.1$  Hz, 2H, H-2',6'), 7.24 (dd,  $^3J = 7.1$  Hz,  $^4J = 1.6$  Hz, 1H, H-7), 7.22 (d,  $^3J = 8.1$  Hz, 2H, H-3',5'), 6.99 (d,  $^3J_{5,6} = 9.7$  Hz, 1H, H-6), 6.91-6.83 (m, 2H, H-9, H-8), 6.33 (d,  $^3J = 8.0$  Hz, 1H, H-10), 6.11 (dd,  $^3J_{5,6} = 9.7$  Hz,  $^3J_{4a,5} = 4.8$  Hz, 1H, H-5), 5.97 (s, 1H, H-2), 5.63 (d,  $^3J = 4.7$  Hz, 1H, H-4a), 5.54 (br s, 1H, OH), 2.35 (s, 3H, Me) ppm.

$^{19}\text{F NMR}$  (376.3 MHz,  $\text{CD}_3\text{CN}$ ):  $\delta$  -82.0 ( $\text{CF}_3$ ) ppm.

**(3*R*\*,4*aR*\*)-1-(3,4-Dimethylphenyl)-3-(trifluoromethyl)-3*H*,4*aH*-[1,3]oxazino[3,2-*a*]quinolin-3-ol (3c)**

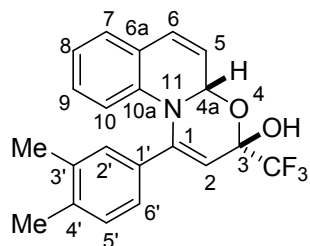

Obtained from quinoline **1a** (0.061 g, 0.475 mmol) and acetylene **2c** (0.113 g, 0.5 mmol). Light-brown powder, m.p. 95-97 °C (heptane),  $R_F(\text{CH}_2\text{Cl}_2\text{-MeOH } 100:1) = 0.30$ , yield 0.169 g (95%).

$^1\text{H NMR}$  (400.1 MHz,  $\text{CD}_3\text{CN}$ ):  $\delta$  7.34 (s, 1H, H-2'), 7.24-7.22 (m, 2H, H-7, H-6'), 7.16 (d,  $^3J = 7.8$  Hz, 1H, H-5'), 6.99 (d,  $^3J_{5,6} = 9.7$  Hz, 1H, H-6), 6.92-6.83 (m, 2H, H-9, H-8), 6.34 (d,  $^3J = 7.9$  Hz, 1H, H-10), 6.10 (dd,  $^3J_{5,6} = 9.5$  Hz,  $^3J_{4a,5} = 4.6$  Hz, 1H, H-5), 5.93 (s, 1H, H-2), 5.61 (d,  $^3J_{4a,5} = 4.5$  Hz, 1H, H-4a), 5.47 (br s, 1H, OH), 2.27 (s, 3H, Me), 2.24 (s, 3H, Me) ppm.

$^{19}\text{F NMR}$  (376.3 MHz,  $\text{CD}_3\text{CN}$ ):  $\delta$  -82.0 ( $\text{CF}_3$ ) ppm.

**(3*R*\*,4*aR*\*)-1-(4-(*tert*-Butyl)phenyl)-3-(trifluoromethyl)-3*H*,4*aH*-[1,3]oxazino[3,2-*a*]quinolin-3-ol (3d).**

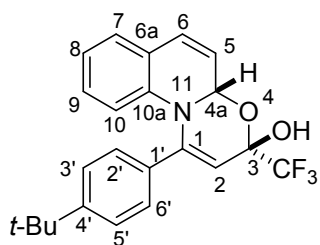

Obtained from quinoline **1a** (0.061 g, 0.475 mmol) and acetylene **2d** (0.127 g, 0.5 mmol). Light-brown powder, m.p. 104-106 °C (heptane),  $R_F(\text{CH}_2\text{Cl}_2\text{-MeOH } 100:1) = 0.27$ , yield 0.182 g (96%).  $^1\text{H NMR}$  (400.1 MHz,  $\text{CD}_3\text{CN}$ ):  $\delta$  7.42-7.48 (m, 4H, H-2',3',5',6'), 7.24 (dd,  $^3J = 7.2$  Hz,  $^4J = 1.6$  Hz, 1H, H-7), 7.00 (d,  $^3J_{5,6} = 9.7$  Hz, 1H, H-6), 6.90-6.83 (m, 2H, H-9, H-8), 6.32 (d,  $^3J = 7.8$  Hz, 1H, H-10), 6.10 (dd,  $^3J_{5,6} = 9.7$  Hz,  $^3J_{4a,5} = 4.8$  Hz, 1H, H-5), 5.98 (s, 1H, H-2), 5.63 (d,  $^3J_{4a,5} = 4.8$  Hz, 1H, H-4a), 5.51 (s, 1H, OH), 1.31 (s, 9H, 3Me from *t*-Bu) ppm.

$^{19}\text{F NMR}$  (376.3 Hz,  $\text{CD}_3\text{CN}$ ):  $\delta$  -82.0 ( $\text{CF}_3$ ) ppm.

**(3*R*\*,4*aR*\*)-1-(4-Methoxyphenyl)-3-(trifluoromethyl)-3*H*,4*aH*-[1,3]-oxazino[3,2-*a*]quinolin-3-ol (3e).**

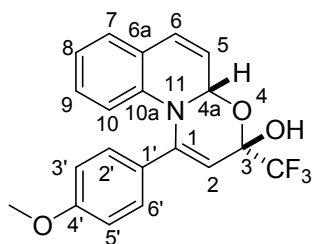

Obtained from quinoline **1a** (0.061 g, 0.475 mmol) and acetylene **2e** (0.114 g, 0.5 mmol). Light-brown powder, m.p. 95-97 °C (heptane),  $R_F(\text{CH}_2\text{Cl}_2\text{-MeOH } 100:1) = 0.43$ , yield 0.176 g (99%).

$^1\text{H NMR}$  (400.1 MHz,  $\text{CD}_3\text{CN}$ ):  $\delta$  7.46 (d,  $^3J = 8.9$  Hz, 2H, H-2',6'), 7.24 (dd,  $^3J = 7.3$  Hz,  $^4J = 1.5$  Hz, 1H, H-7), 7.00 (d,  $^3J_{5,6} = 9.7$  Hz, 1H, H-6), 6.93 (d,  $^3J = 8.9$  Hz, 2H, H-3',5'), 6.90-6.83 (m, 2H, H-9, H-8), 6.35 (d,  $^3J = 8.0$  Hz, 1H, H-10), 6.10 (dd,  $^3J_{5,6} = 9.8$  Hz,  $^3J_{4a,5} = 4.9$  Hz, 1H, H-5), 5.92 (s, 1H, H-2), 5.63 (d,  $^3J_{4a,5} = 4.7$  Hz, 1H, H-4a), 5.58 (br s, 1H, OH), 3.79 (s, 3H, OMe) ppm.

$^{19}\text{F NMR}$  (376.3 MHz,  $\text{CD}_3\text{CN}$ ):  $\delta$  -82.0 ( $\text{CF}_3$ ) ppm.

**(3*R*\*,4*aR*\*)-1-[4-(Methylthio)phenyl]-3-(trifluoromethyl)-3*H*,4*aH*-[1,3]oxazino[3,2-*a*]quinolin-3-ol (3f).**

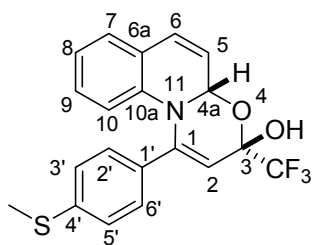

Obtained from quinoline **1a** (0.061 g, 0.475 mmol) and acetylene **2f** (0.122 g, 0.5 mmol). Light-brown powder, m.p. 98-100 °C (heptane),  $R_F(\text{CH}_2\text{Cl}_2\text{-MeOH } 100:1) = 0.20$ , yield 0.178 g (96%).

$^1\text{H NMR}$  (400.1 MHz,  $\text{CD}_3\text{CN}$ ):  $\delta$  7.45 (d,  $^3J = 8.4$  Hz, 2H, H-2',6'), 7.26-7.21 (m, 3H, H-7, H-3',5'), 6.99 (d,  $^3J_{5,6} = 9.7$  Hz, 1H, H-6), 6.94-6.84 (m, 2H, H-9, H-8), 6.33 (d,  $^3J = 8.1$  Hz, 1H, H-10), 6.10 (dd,  $^3J_{5,6} = 9.6$  Hz,  $^3J_{4a,5} = 4.8$  Hz, 1H, H-5), 5.98 (s, 1H, H-2), 5.61 (d,  $^3J_{4a,5} = 4.3$  Hz, 1H, H-4a), 5.54 (br s, 1H, OH), 2.47 (s, 3H, MeS) ppm.

$^{19}\text{F NMR}$  (376.3 MHz,  $\text{CD}_3\text{CN}$ ):  $\delta$  -82.0 ( $\text{CF}_3$ ) ppm.

**(3*R*\*,4*aR*\*)-1-(4-Chlorophenyl)-3-(trifluoromethyl)-3*H*,4*aH*-[1,3]oxazino[3,2-*a*]quinolin-3-ol (3g).**

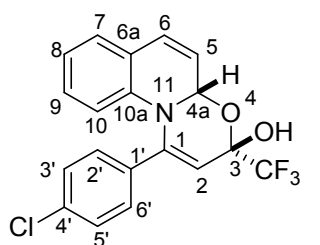

Obtained from quinoline **1a** (0.061 g, 0.475 mmol) and acetylene **2g** (0.116 g, 0.5 mmol). Light-brown powder, m.p. 91-93 °C (heptane),  $R_F(\text{CH}_2\text{Cl}_2\text{-MeOH } 100:1) = 0.70$ , yield 0.159 g (88%).

<sup>1</sup>H NMR (400.1 MHz, CD<sub>3</sub>CN): δ 7.53 (d, <sup>3</sup>J = 8.7 Hz, 2H, H-2',6'), 7.42 (d, <sup>3</sup>J = 8.7 Hz, 2H, H-3',5'), 7.25 (dd, <sup>3</sup>J = 7.4 Hz, <sup>4</sup>J = 1.4 Hz, 1H, H-7), 6.99 (d, <sup>3</sup>J<sub>5,6</sub> = 9.8 Hz, 1H, H-6), 6.95-6.85 (m, 2H, H-9, H-8), 6.27 (d, <sup>3</sup>J = 8.0 Hz, 1H, H-10), 6.11 (dd, <sup>3</sup>J<sub>5,6</sub> = 9.7 Hz, <sup>3</sup>J<sub>4a,5</sub> = 4.8 Hz, 1H, H-5), 6.03 (s, 1H, H-2), 5.62 (d, <sup>3</sup>J = 4.8 Hz, 1H, H-4a), 5.55 (br s, 1H, OH) ppm.

<sup>19</sup>F NMR (376.3 MHz, CD<sub>3</sub>CN): δ -82.0 (CF<sub>3</sub>) ppm.

**(3R\*,4aR\*)-1-(4-Bromophenyl)-3-(trifluoromethyl)-3H,4aH-[1,3]oxazino[3,2-a]quinolin-3-ol (3h).**

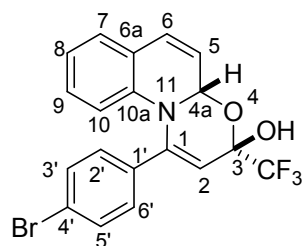

Obtained from quinoline **1a** (0.061 g, 0.475 mmol) and acetylene **2h** (0.138 g, 0.5 mmol). Light-brown powder, m.p. 128-130 °C (heptane), R<sub>F</sub>(CH<sub>2</sub>Cl<sub>2</sub>-MeOH 100:1) = 0.73, yield 0.192 g (95%).

<sup>1</sup>H NMR (400.1 MHz, CD<sub>3</sub>CN): δ 7.57 (d, <sup>3</sup>J = 8.6 Hz, 2H, H-3',5'), 7.45 (d, <sup>3</sup>J = 8.6 Hz, 2H, H-2',6'), 7.25 (dd, <sup>3</sup>J = 7.3 Hz, <sup>4</sup>J = 1.2 Hz, 1H, H-7), 7.00 (d, <sup>3</sup>J<sub>5,6</sub> = 9.7 Hz, 1H, H-6), 6.95-6.85 (m, 2H, H-9, H-8), 6.27 (d, <sup>3</sup>J = 8.0 Hz, 1H, H-10), 6.10 (dd, <sup>3</sup>J<sub>5,6</sub> = 9.7 Hz, <sup>3</sup>J<sub>4a,5</sub> = 4.8 Hz, 1H, H-5), 6.04 (s, 1H, H-2), 5.61 (d, <sup>3</sup>J<sub>4a,5</sub> = 4.8 Hz, 1H, H-4a), 5.56 (s, 1H, OH) ppm.

<sup>19</sup>F NMR (376.3 MHz, CD<sub>3</sub>CN): δ -81.9 (CF<sub>3</sub>) ppm.

**(3R\*,4aR\*)-1-(2-Chlorophenyl)-3-(trifluoromethyl)-3H,4aH-[1,3]oxazino[3,2-a]quinolin-3-ol (3i).**

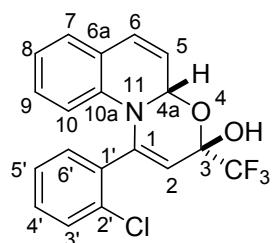

Obtained from quinoline **1a** (0.061 g, 0.475 mmol) and acetylene **2i** (0.116 g, 0.5 mmol). Light-brown powder, m.p. 100-102 °C (heptane), yield 0.165 g (91%).

<sup>1</sup>H NMR (400.1 MHz, CD<sub>3</sub>CN): δ 7.54-7.49 (m, 2H), 7.41 (td, <sup>3</sup>J = 7.7 Hz, <sup>4</sup>J = 1.8 Hz, 1H), 7.35 (td, <sup>3</sup>J = 7.4 Hz, <sup>4</sup>J = 1.4 Hz, 1H), 7.23 (dd, <sup>3</sup>J = 7.4 Hz, <sup>4</sup>J = 1.2 Hz, 1H, H-7), 6.97 (d, <sup>3</sup>J<sub>5,6</sub> = 9.8 Hz, 1H, H-6), 6.94-6.90 (m, 1H, H-9), 6.86-6.81 (m, 1H, H-8), 6.36 (d, <sup>3</sup>J = 8.1 Hz, 1H, H-10), 6.09 (dd, <sup>3</sup>J<sub>5,6</sub> = 9.8 Hz, <sup>3</sup>J<sub>4a,5</sub> = 4.6 Hz, 1H, H-5), 5.94 (s, 1H, H-2), 5.71 (d, <sup>3</sup>J = 4.3 Hz, 1H, H-4a), 5.53 (br s, 1H, OH) ppm.

<sup>19</sup>F NMR (376.3 MHz, CD<sub>3</sub>CN): δ -81.8 (CF<sub>3</sub>) ppm.

<sup>13</sup>C NMR (100.6 Hz, CD<sub>3</sub>CN): δ 145.0 (C-1), 137.4, 134.4, 133.0, 131.79, 131.77, 131.5, 130.2, 129.9, 129.1, 128.6, 123.6 (q, <sup>1</sup>J<sub>CF</sub> = 285.3 Hz, CF<sub>3</sub>), 122.1, 121.9, 121.6, 119.1, 116.4, 116.0, 92.7 (q, <sup>2</sup>J<sub>CF</sub> = 32.8 Hz, C-3), 78.8 (C-4a) ppm.

HRMS (ESI-TOF): m/z [M-OH]<sup>+</sup> Calcd for C<sub>19</sub>H<sub>12</sub>ClF<sub>3</sub>NO<sup>+</sup>: 362.0554; found: 362.0554; m/z [M+H]<sup>+</sup> Calcd for C<sub>19</sub>H<sub>14</sub>ClF<sub>3</sub>NO<sub>2</sub><sup>+</sup>: 380.066; found: 380.0658.

**(3R\*,4aR\*)-1-(2,3-Dihydrobenzo[b][1,4]dioxin-7-yl)-3-(trifluoromethyl)-3H,4aH-[1,3]-oxazino[3,2-**

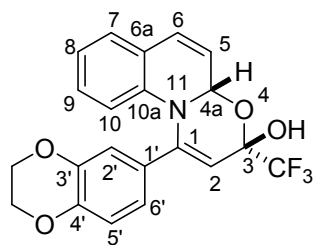

**a]quinolin-3-ol (3j).** Obtained from quinoline **1a** (0.061 g, 0.475 mmol) and acetylene **2j** (0.114 g, 0.5 mmol). Yellow-brown powder, m.p. 114-116 °C (heptane), yield 0.190 g (99%).

<sup>1</sup>H NMR (400.1 MHz, CD<sub>3</sub>CN): δ 7.24 (dd, <sup>3</sup>J = 7.5 Hz, <sup>4</sup>J = 1.5 Hz, 1H, H-7), 7.03-6.92 (m, 4H, H-6, H-9, H-5', 6'), 6.88-6.84 (m, 2H, H-8, H-2'), 6.36 (d, <sup>3</sup>J = 8.2 Hz, 1H, H-10), 6.08 (dd, <sup>3</sup>J<sub>5,6</sub> = 9.7 Hz, <sup>3</sup>J<sub>4a,5</sub> = 4.8 Hz, 1H, H-5), 5.89 (s, 1H, H-2), 5.58 (d, <sup>3</sup>J<sub>4a,5</sub> = 4.8 Hz, 1H, H-4a), 5.34 (br s, 1H, OH), 4.27-4.21 (m, 4H, OCH<sub>2</sub>CH<sub>2</sub>O) ppm.

<sup>13</sup>C NMR (100.6 Hz, CD<sub>3</sub>CN): δ 148.0, 146.2, 144.9 (C-1), 138.3, 130.4, 129.5, 128.8, 128.7, 123.5 (q, <sup>1</sup>J<sub>CF</sub> = 285.5 Hz, CF<sub>3</sub>), 122.5, 121.4, 120.3, 119.2, 118.6, 118.0, 116.0, 111.2, 93.0 (q, <sup>2</sup>J<sub>CF</sub> = 32.8 Hz, C-3), 78.3 (C-4a), 65.3 (CH<sub>2</sub>), 65.0 (CH<sub>2</sub>) ppm.

<sup>19</sup>F NMR (376.3 MHz, CD<sub>3</sub>CN): δ -82.2 (CF<sub>3</sub>) ppm.

HRMS (ESI-TOF): m/z [M-OH]<sup>+</sup> Calcd for C<sub>21</sub>H<sub>15</sub>F<sub>3</sub>NO<sub>3</sub><sup>+</sup>: 386.0999; found: 386.0999; m/z [M+H]<sup>+</sup> Calcd for C<sub>21</sub>H<sub>17</sub>F<sub>3</sub>NO<sub>4</sub><sup>+</sup>: 404.1104; found: 404.1108.

**(3R\*,4aR\*)-9-Chloro-1-phenyl-3-(trifluoromethyl)-3H,4aH-[1,3]-oxazino[3,2-a]quinolin-3-ol (3k).**

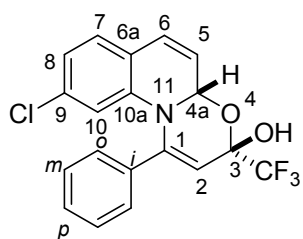

Obtained from quinoline **1b** (0.078 g, 0.475 mmol) and acetylene **2a** (0.099 g, 0.5 mmol). Pale yellow powder, m.p. 146-148 °C (heptane), yield 0.169 g (94%). <sup>1</sup>H NMR (400.13 MHz, CD<sub>3</sub>CN): δ 7.59-7.54 (m, 2H, H<sub>o</sub> from Ph), 7.49-7.41 (m, 3H, H<sub>m,p</sub> from Ph), 7.22 (d, <sup>3</sup>J<sub>7,8</sub> = 8.1 Hz, 1H, H-7), 6.99 (d, <sup>3</sup>J<sub>5,6</sub> = 9.8 Hz, 1H, H-6), 6.85 (dd, <sup>3</sup>J<sub>7,8</sub> = 8.1 Hz, <sup>4</sup>J<sub>8,10</sub> = 1.9 Hz, 1H, H-8), 6.28 (d, <sup>4</sup>J<sub>8,10</sub> = 1.5 Hz, 1H, H-10), 6.13 (dd, <sup>3</sup>J<sub>5,6</sub> = 9.8 Hz, <sup>3</sup>J<sub>4a,5</sub> = 4.8 Hz, 1H, H-5), 6.07 (s, 1H, H-2), 5.67 (d, <sup>3</sup>J<sub>4a,5</sub> = 4.8 Hz, 1H, H-4a), 5.49 (s, 1H, OH) ppm.

<sup>13</sup>C NMR (100.6 Hz, CD<sub>3</sub>CN): δ 148.0 (C-1), 139.2, 135.0, 134.2, 131.1, 130.2, 130.1, 129.5, 127.3, 123.5 (q, <sup>1</sup>J<sub>CF</sub> = 285.1 Hz, CF<sub>3</sub>), 121.4, 121.3, 119.7, 117.6, 113.3, 93.0 (q, <sup>2</sup>J<sub>CF</sub> = 33.0 Hz, C-3), 78.2 (C-4a) ppm.

<sup>19</sup>F NMR (376.50 MHz, CD<sub>3</sub>CN): δ -82.0 (CF<sub>3</sub>) ppm.

HRMS (ESI-TOF): m/z [M-OH]<sup>+</sup> Calcd for C<sub>19</sub>H<sub>12</sub>ClF<sub>3</sub>NO<sup>+</sup>: 362.0554; found: 362.0555; m/z [M+H]<sup>+</sup> Calcd for C<sub>19</sub>H<sub>14</sub>ClF<sub>3</sub>NO<sub>2</sub><sup>+</sup>: 380.066; found: 380.0655.

**(3R\*,4aR\*)-8-Chloro-1-phenyl-3-(trifluoromethyl)-3H,4aH-[1,3]-oxazino[3,2-a]quinolin-3-ol (3l).**

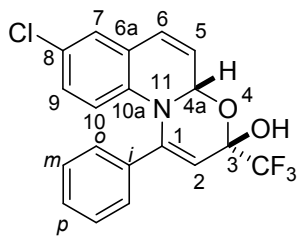

Obtained from quinoline **1c** (0.078 g, 0.475 mmol) and acetylene **2a** (0.099 g, 0.5 mmol). White powder, m.p. 138-140 °C (heptane), yield 0.175 g (97%). <sup>1</sup>H NMR (400.13 MHz, CDCl<sub>3</sub>): δ 7.53-7.50 (m, 2H, H<sub>o</sub> from Ph), 7.44-7.36 (m, 3H, H<sub>m,p</sub> from Ph), 7.16 (d, <sup>4</sup>J<sub>7,9</sub> = 2.4 Hz, 1H, H-7), 6.86 (d, <sup>3</sup>J<sub>5,6</sub> = 8.9 Hz, 1H, H-6), 6.85 (d, <sup>3</sup>J<sub>9,10</sub> = 8.8 Hz, 1H, H-9), 6.28 (d, <sup>3</sup>J<sub>9,10</sub> = 8.8 Hz, 1H, H-10), 6.08 (dd, <sup>3</sup>J<sub>5,6</sub> = 9.8 Hz, <sup>3</sup>J<sub>4a,5</sub> = 4.8 Hz, 1H, H-5), 6.00 (s, 1H, H-2), 5.67 (d, <sup>3</sup>J<sub>4a,5</sub> = 4.5 Hz, 1H, H-4a), 3.22 (s, 1H, OH) ppm.

<sup>19</sup>F NMR (376.3 MHz, CDCl<sub>3</sub>): δ -84.2 (CF<sub>3</sub>) ppm.

**(3R\*,4aR\*)-3-Hydroxy-1-phenyl-3-(trifluoromethyl)-3H,4aH-[1,3]oxazino[3,2-a]quinoline-6-carbonitrile (3m).** Obtained from quinoline **1f** (0.073 g, 0.475 mmol)

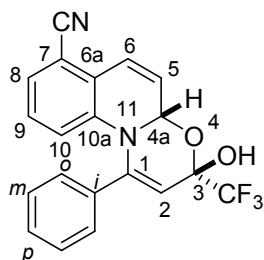

and acetylene **2a** (0.099 g, 0.5 mmol). Light-brown powder, m.p. 107-110 °C (heptane),  $R_F(\text{CH}_2\text{Cl}_2\text{-MeOH } 100:1) = 0.30$ , yield 0.170 g (97%).

$^1\text{H NMR}$  (400.1 MHz,  $\text{CD}_3\text{CN}$ ):  $\delta$  7.56-7.52 (m, 2H,  $\text{H}_o$  from Ph), 7.46-7.39 (m, 3H,  $\text{H}_{m,p}$  from Ph), 7.31 (d,  $^3J_{5,6} = 10.0$  Hz, 1H, H-6), 7.21 (dd,  $^3J = 7.7$  Hz,  $^4J = 1.0$  Hz, 1H, H-8), 7.00 (pseudo-t,  $^3J \sim 8$  Hz, 1H, H-9), 6.59 (pseudo-d,  $^3J \sim 8$  Hz, 1H, H-10), 6.38 (dd,  $^3J_{5,6} = 9.9$  Hz,  $^3J_{4a,5} = 4.8$  Hz, 1H, H-5), 6.10 (s, 1H, H-2), 5.72 (d,  $^3J_{4a,5} = 5.0$  Hz, 1H, H-4a), 5.72 (br. s, 1H, OH) ppm.

$^{19}\text{F NMR}$  (376.3 MHz,  $\text{CD}_3\text{CN}$ ):  $\delta$  -82.2 ( $\text{CF}_3$ ) ppm.

**(3R\*,4aR\*)-8-Bromo-1-phenyl-3-(trifluoromethyl)-3H,4aH-[1,3]-oxazino[3,2-a]quinolin-3-ol (3n).**

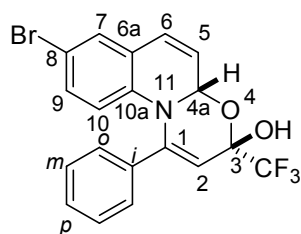

Obtained from quinoline **1d** (0.098 g, 0.475 mmol) and acetylene **2a** (0.099 g, 0.5 mmol). White powder, m.p. 136-138 °C (heptane), yield 0.195 g (97%).

$^1\text{H NMR}$  (400.1 MHz,  $\text{CD}_3\text{CN}$ ):  $\delta$  7.55-7.53 (m, 2H,  $\text{H}_o$  from Ph), 7.45-7.39 (m, 4H,  $\text{H}_{m,p}$  from Ph, H-7), 7.00 (dd,  $^3J_{9,10} = 8.8$  Hz,  $^4J = 2.4$  Hz, 1H, H-9), 6.95 (d,  $^3J_{5,6} = 9.9$  Hz, 1H, H-6), 6.21 (d,  $^3J_{9,10} = 8.8$  Hz, 1H, H-10), 6.16 (dd,  $^3J_{5,6} = 9.8$

Hz,  $^3J_{4a,5} = 4.8$  Hz, 1H, H-5), 6.02 (s, 1H, H-2), 5.64 (d,  $^3J_{4a,5} = 4.8$  Hz, 1H, H-4a), 5.59 (s, 1H, OH) ppm.

$^{13}\text{C NMR}$  (100.16 Hz,  $\text{CD}_3\text{CN}$ ):  $\delta$  148.2 (C-1), 137.3 (C-10a), 135.1 ( $\text{C}_i$  from Ph), 131.9 (C-6), 131.00 and 130.98 ( $\text{C}_p$  from Ph, C-6), 130.1 ( $\text{C}_m$  from Ph), 129.3 (C-9), 127.3 ( $\text{C}_o$  from Ph), 127.3 (C-7), 124.5 (C-8), 123.5 (q,  $^1J_{\text{CF}} = 284.9$  Hz,  $\text{CF}_3$ ), 120.8 (C-5), 119.7 (C-10), 113.3 (C-6a), 113.0 (C-2), 93.0 (q,  $^2J_{\text{CF}} = 33.2$  Hz, C-3), 78.2 (C-4a) ppm.

$^{19}\text{F NMR}$  (376.50 Hz,  $\text{CD}_3\text{CN}$ ):  $\delta$  -82.1 ( $\text{CF}_3$ ) ppm.

HRMS (ESI-TOF):  $m/z$   $[\text{M-OH}]^+$  Calcd for  $\text{C}_{19}\text{H}_{12}\text{BrF}_3\text{NO}^+$ : 406.0049; found: 406.0052;  $m/z$   $[\text{M+H}]^+$  Calcd for  $\text{C}_{19}\text{H}_{14}\text{BrF}_3\text{NO}_2^+$ : 424.0155; found: 424.0157.

**(3R\*,4aR\*)-6-Bromo-1-phenyl-3-(trifluoromethyl)-3H,4aH-[1,3]oxazino[3,2-a]quinolin-3-ol (3o).**

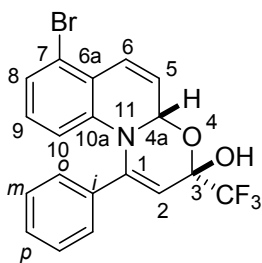

Obtained from quinoline **1e** (0.099 g, 0.475 mmol) and acetylene **2a** (0.099 g, 0.5 mmol). Light-brown powder, m.p. 115-117 °C (heptane),  $R_F(\text{CH}_2\text{Cl}_2\text{-MeOH } 100:1) = 0.71$ , yield 0.199 g (99%).

$^1\text{H NMR}$  (400.1 MHz,  $\text{CD}_3\text{CN}$ ):  $\delta$  7.55-7.53 (m, 2H,  $\text{H}_o$  from Ph), 7.45-7.36 (m, 4H, H-6,  $\text{H}_{m,p}$  from Ph), 7.10 (d,  $^3J = 8.1$  Hz, 1H, H-8), 6.77 (t,  $^3J = 8.1$  Hz, 1H, H-9), 6.33 (d,  $^3J = 8.1$  Hz, 1H, H-10), 6.25 (dd,  $^3J_{5,6} = 9.8$  Hz,  $^3J_{4a,5} = 4.7$  Hz, 1H, H-5), 6.08 (s,

1H, H-2), 5.65 (d,  $^3J = 4.7$  Hz, 1H, H-4a), 5.61 (br. s, 1H, OH) ppm.

$^{19}\text{F NMR}$  (376.3 MHz,  $\text{CD}_3\text{CN}$ ):  $\delta$  -82.1 ( $\text{CF}_3$ ) ppm.

**(3R\*,4aR\*)-5-Bromo-1-phenyl-3-(trifluoromethyl)-3H,4aH-[1,3]-oxazino[3,2-**

**a]quinolin-3-ol (3p).** Obtained from quinoline **1g** (0.099 g, 0.475 mmol) and acetylene

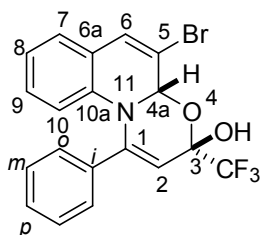

**2a** (0.099 g, 0.5 mmol). Light-yellow powder, m.p. 68-70 °C (heptane), yield 0.186 g (92%).

<sup>1</sup>H NMR (400.1 MHz, CD<sub>3</sub>CN): δ 7.58-7.55 (m, 2H, H<sub>o</sub> from Ph), 7.48-7.38 (m, 4H, H<sub>m</sub> and H<sub>p</sub> from Ph, H-6), 7.22 (dd, <sup>3</sup>J = 7.2 Hz, <sup>4</sup>J = 1.7 Hz, 1H, H-7), 6.96-6.86 (m, 2H, H-9, H-8), 6.32 (d, <sup>3</sup>J<sub>9,10</sub> = 8.1 Hz, 1H, H-10), 6.06 (s, 1H, H-2), 5.74 (s, 1H, H-4a), 5.67 (br. s, 1H, OH) ppm.

<sup>13</sup>C NMR (100.16 Hz, CD<sub>3</sub>CN): δ 148.0 (C-2), 136.9 (C-11a), 135.1 (C<sub>i</sub> from Ph), 132.6 (C-6), 131.1 (C<sub>p</sub> from Ph), 130.1 (C<sub>m</sub> from Ph), 130.0 (C-9), 128.4 (C-7), 127.4 (C<sub>o</sub> from Ph), 123.3 (q, <sup>1</sup>J<sub>CF</sub> = 282.9 Hz, CF<sub>3</sub>), 122.1 (C-6a), 122.0 (C-8), 118.9 (C-10), 113.0 (C-5), 112.4 (C-2), 93.4 (q, <sup>2</sup>J<sub>CF</sub> = 33.2 Hz, C-3), 83.3 (C-4a) ppm.

<sup>19</sup>F NMR (376.5 MHz, CD<sub>3</sub>CN): δ -82.0 (CF<sub>3</sub>) ppm.

### (6a*R*\*,8*R*\*)-10-Phenyl-8-(trifluoromethyl)-6a*H*,8*H*-[1,3]oxazino[3,2-*a*][1,8]naphthyridin-8-ol (**3q**).

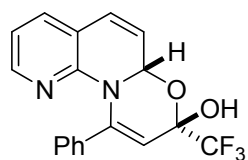

Obtained from 1,8-naphthyridine **1h** (0.062 g, 0.475 mmol) and acetylene **2a** (0.099 g, 0.5 mmol). Pale brown crystals, m.p. 145-147 °C (heptane), yield 0.155 g (94%).

<sup>1</sup>H NMR (400.1 MHz, CD<sub>3</sub>CN): δ 7.73 (dd, <sup>3</sup>J = 4.8 Hz, <sup>4</sup>J = 1.6 Hz, 1H), 7.55 (dd, <sup>3</sup>J = 7.4 Hz, <sup>4</sup>J = 1.5 Hz, 1H), 7.49-7.45 (m, 2H, H<sub>o</sub> from Ph), 7.37-7.32 (m, 3H, H<sub>m,p</sub> from Ph), 7.00 (d, <sup>3</sup>J = 9.7 Hz, 1H), 6.82 (dd, <sup>3</sup>J = 7.4 Hz, <sup>3</sup>J = 5.0 Hz, 1H), 6.16 (dd, <sup>3</sup>J = 9.7 Hz, <sup>3</sup>J = 4.7 Hz, 1H), 5.96 (s, 1H), 5.81 (d, <sup>3</sup>J = 4.6 Hz, 1H), 5.65 (s, 1H, OH) ppm.

<sup>19</sup>F NMR (376.5 MHz, CD<sub>3</sub>CN): δ -82.0 (CF<sub>3</sub>) ppm.

### Epimerization of (3*R*\*,4a*R*\*)-1-phenyl-3-(trifluoromethyl)-3*H*,4a*H*-[1,3]oxazino[3,2-*a*]quinolin-3-ol (**3a**).

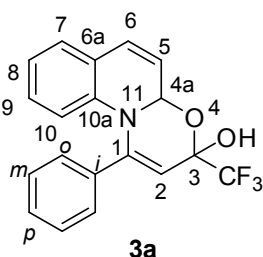

Oxazine **3a** (0.050 g, 0.145 mmol) was dissolved in t-BuOH (1 mL) and H<sub>2</sub>O (0.5 mL) was added. The solution formed was left overnight. The volatiles were evaporated in vacuo to give mixture of **3a** ((3*R*\*,4a*R*\*)-isomer) and **3a'** ((3*S*\*,4a*R*\*)-isomer) (0.050 g, ~100%) as light brown powder, m.p. 142-144 °C. (3*R*\*, 4a*R*\*):(3*S*\*, 4a*R*\*)-isomers ratio is 87:13.

<sup>1</sup>H NMR (400.13 MHz, CDCl<sub>3</sub>): δ 7.54-7.52 (m, 2H, H<sub>o</sub> from Ph), 7.43-7.35 (m, 3H, H<sub>m,p</sub> from Ph), 7.0 (d, <sup>3</sup>J = 7.2 Hz, 1H, H-7), 6.97-6.81 (m, 3H, H-6, H-9, H-8), 6.33 (d, <sup>3</sup>J = 7.8 Hz, 1H, H-10), 6.04 (dd, <sup>3</sup>J<sub>5,6</sub> = 9.3 Hz, <sup>3</sup>J<sub>4a,5</sub> = 4.4 Hz, 1H, H-5), 5.97 (s, 1H, H-2), 5.68 (br s, 1H, H-4a), 3.19 (s, 1H, OH) ppm.

<sup>19</sup>F NMR (376.50 Hz, CDCl<sub>3</sub>): δ -84.3 (CF<sub>3</sub>) ppm;

(4*S*\*, 5a*R*\*)-**3a'**: <sup>1</sup>H NMR (400.13 MHz, CDCl<sub>3</sub>): 6.09 (dd, <sup>3</sup>J<sub>5a,6</sub> = 4.7 Hz, <sup>3</sup>J<sub>6,7</sub> = 9.8 Hz, 1H, H-6), 5.62 (d, <sup>3</sup>J<sub>5a,6</sub> = 4.7 Hz, 1H, H-5a) ppm. The other signals are identical to those of major isomer.

<sup>19</sup>F NMR (376.50 Hz, CDCl<sub>3</sub>): δ -81.1 (CF<sub>3</sub>) ppm.

### (3*R*\*,4a*R*\*)-3-Ethoxy-1-phenyl-3-(trifluoromethyl)-3*H*,4a*H*-[1,3]oxazino[3,2-*a*]quinoline (**4**).

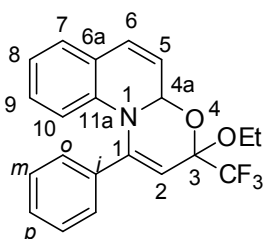

Oxazine **3a** (0.100 g, 0.29 mmol) was dissolved in absolute EtOH (1 mL) and the solution formed was left for 1 day. The volatiles were evaporated in vacuo to give **4** (0.106 g, 98%) as light yellow powder, m.p. 130-132 °C.



$^1\text{H}$  NMR (400.13 MHz,  $\text{CD}_3\text{CN}$ ):  $\delta$  7.56-7.54 (m, 2H,  $\text{H}_o$  from Ph), 7.47-7.38 (m, 3H,  $\text{H}_{m,p}$  from Ph), 7.25 (dd,  $^3J = 7.1$  Hz,  $^4J = 1.8$  Hz, 1H, H-7), 7.01 (d,  $^3J_{5,6} = 9.7$  Hz, 1H, H-6), 6.91-6.83 (m, 2H, H-9, H-8), 6.32 (d,  $^3J = 7.8$  Hz, 1H, H-10), 6.20 (dd,  $^3J_{5,6} = 9.7$  Hz,  $^3J_{4a,5} = 4.7$  Hz, 1H, H-5), 6.07 (s, 1H, H-2), 5.69 (d,  $^3J_{4a,5} = 4.8$  Hz, 1H, H-4a), 3.91-3.78 (m, 2H,  $\text{CH}_2$ ), 1.24 (t, 3H,  $^3J = 7.0$  Hz,  $\text{CH}_3$ ) ppm.

$^{19}\text{F}$  NMR (376.50 MHz,  $\text{CD}_3\text{CN}$ ):  $\delta$  -80.1 ( $\text{CF}_3$ ) ppm.

$^{13}\text{C}$  NMR (100.6 MHz,  $\text{CD}_3\text{CN}$ ):  $\delta$  150.5, 138.1, 135.4, 131.1, 130.4, 130.1, 129.6, 128.9, 127.42, 127.36, 123.2 (q,  $^1J_{\text{CF}} = 286.2$  Hz,  $\text{CF}_3$ ), 121.6, 119.0, 117.9, 112.8, 95.6 (q,  $^2J_{\text{CF}} = 31.7$  Hz), 80.3, 60.0, 15.8 ppm.

HRMS (ESI-TOF):  $m/z$   $[\text{M}+\text{H}]^+$  Calcd for  $\text{C}_{21}\text{H}_{18}\text{F}_3\text{NO}_2^+$ : 374.1362; found: 374.1369.

**Reaction of oxazine (3a) with methyl 2-mercaptoacetate.** A 4 mL vial with a screw cup was charged with

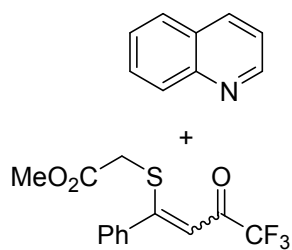

with oxazine **3a** (0.071 g, 0.2 mmol), solution of methyl 2-mercaptoacetate in MeOH (1 mL, 0.5 M, 0.5 mmol) and left at room temperature for 72 h. MeOH was evaporated to give 0.093 g of light brown oil, consisting of quinoline, methyl 2-((4,4,4-trifluoro-3-oxo-1-phenylbut-1-en-1-yl)thio)acetate **5** (85:15 mixture of isomers) and dimethyl 2,2'-disulfanediyldiacetate ( $\text{MeCO}_2\text{-CH}_2\text{-S-S-CH}_2\text{CO}_2\text{Me}$

appeared due to oxidation of methyl 2-mercaptoacetate by oxygen) in molar ratio 1:1:0.22. Compound **5**, major isomer:  $^1\text{H}$  NMR (400.13 MHz,  $\text{CDCl}_3$ ):  $\delta$  7.40-7.42 (m, 2H, Ar), 7.21-7.25 (m, 3H, Ar), 6.57 (s, 1H,  $\text{C}=\underline{\text{CH}}$ ), 3.52 (s, 3H,  $\text{OCH}_3$ ), 3.31 (s, 2H,  $\text{SCH}_2$ ).  $^{13}\text{C}$  NMR (100.6 MHz,  $\text{CDCl}_3$ ):  $\delta$  177.3 (q,  $\underline{\text{C}}\text{-CF}_3$ ,  $J = 35.0$ ), 171.3, 168.3, 136.7, 129.9, 128.8, 127.6, 116.1 (q,  $\text{CF}_3$ ,  $J = 290.4$ ), 114.8, 52.5, 35.0.  $^{19}\text{F}$  NMR (376.50 Hz,  $\text{CDCl}_3$ ):  $\delta$  -78.7. Minor isomer:  $^1\text{H}$  NMR (400.13 MHz,  $\text{CDCl}_3$ ):  $\delta$  7.41-7.44 (m, 2H, Ar), 7.30-7.32 (m, 3H, Ar), 6.47 (s, 1H,  $\text{C}=\underline{\text{CH}}$ ), 3.78 (s, 3H,  $\text{OCH}_3$ ), 3.66 (s, 2H,  $\text{SCH}_2$ ).  $^{13}\text{C}$  NMR (100.6 MHz,  $\text{CDCl}_3$ ):  $\delta$  130.2, 128.4, 127.9, 109.3, 52.9, other signals are identical to those of major isomer.  $^{19}\text{F}$  NMR (376.50 Hz,  $\text{CDCl}_3$ ):  $\delta$  -79.6. Quinoline:  $^1\text{H}$  NMR (400.13 MHz,  $\text{CDCl}_3$ ):  $\delta$  8.88 (dd,  $^3J = 4.3$  Hz,  $^4J = 1.7$  Hz, 1H), 8.14 (dd,  $^3J = 8.3$  Hz,  $^4J = 1.1$  Hz, 1H), 8.09 (d,  $^3J = 8.5$  Hz, 1H), 7.78 (dd,  $^3J = 8.1$  Hz,  $^4J = 0.7$  Hz, 1H), 7.70-7.66 (m, 1H), 7.53-7.49 (m, 1H), 7.38-7.34 (m, 1H).  $^{13}\text{C}$  NMR (100.6 MHz,  $\text{CDCl}_3$ ):  $\delta$  150.0, 147.7, 136.3, 129.5, 128.9, 128.2, 127.7, 126.6, 121.0. The NMR data of 2-((4,4,4-trifluoro-3-oxo-1-phenylbut-1-en-1-yl)thio)acetate **5**<sup>3</sup> and quinoline<sup>4</sup> are in agreement with those in the literature.

**Transformation of oxazine (3a) into 2-phenylquinoline (6).** A 4 mL vial with a screw cap was charged with oxazine **3a** (0.030 g, 0.087 mmol), water (0.5 mL) and NaOH (0.0104 g, 0.261 mmol). The reaction mixture was heated at 80 °C at stirring for 2 h. After cooling down to room temperature, the reaction mixture was extracted with EtOAc (2x0.5 mL), combined organic phase was passed through a short silica gel pad

<sup>3</sup> V. M. Muzalevskiy, A. A. Iskandarov, V. G. Nenajdenko, *J. Fluorine Chem.* **2018**, 214, 13-16.

<sup>4</sup> T. Kaiya, N. Shiraiy, Y. Kawazoe, *Chem. Pharm. Bull.*, 1986, **34**, 881-885.

using heptane followed by heptane-EtOAc (15:1) as an eluents. Evaporation of volatiles afforded **6** as light brown powder, m.p. 81-83 °C (Lit. data: 82-84 °C<sup>5</sup>), yield 0.016 g (90%).

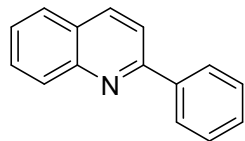

<sup>1</sup>H NMR (400.1 MHz, CDCl<sub>3</sub>): δ 8.22 (d, <sup>3</sup>J = 8.6 Hz, 1H), 8.19-8.15 (m, 3H), 7.87 (d, <sup>3</sup>J = 8.6 Hz, 1H), 7.83 (dd, <sup>3</sup>J = 8.1 Hz, <sup>4</sup>J = 0.7 Hz, 1H), 7.75-7.70 (m, 1H), 7.54-7.51 (m, 3H), 7.48-7.44 (m, 1H) ppm.

<sup>13</sup>C NMR (100.6 MHz, CDCl<sub>3</sub>): δ 157.3, 148.2, 139.6, 136.7, 129.63, 129.61, 129.3, 128.8, 127.5, 127.4, 127.1, 126.2, 119.0 ppm. The NMR data are in agreement with those in the literature<sup>4</sup>.

**Transformation of oxazine (3a) into 2,2,2-trifluoro-1-(2-phenylquinolin-3-yl)ethanone (7).** A 4 mL vial

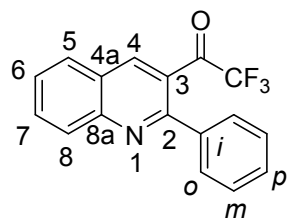

with a screw cap was charged with oxazine **3a** (0.030 g, 0.087 mmol), MeCN (0.5 mL) and morpholine (0.0075 g, 0.087 mmol). The reaction mixture was heated at 80 °C for 6 h and then volatiles were evaporated in vacuo. The residue was passed through a short silica gel pad using heptane followed by heptane-EtOAc (10:1) as an eluents. Evaporation of volatiles afforded **7** as a pale yellow powder, m.p. 86-87 °C,

yield 0.023 g (88%).

<sup>1</sup>H NMR (400.1 MHz, CD<sub>3</sub>CN): δ 8.77 (s, 1H, H-4), 8.09 (m, 1H, H-8), 8.07 (m, 1H, H-5), 7.91 (m, 1H, H-7), 7.68 (m, 1H, H-6), 7.56 (m, 2H, H<sub>o</sub> from Ph), 7.49 (m, 3H, H<sub>m,p</sub> from Ph) ppm.

<sup>13</sup>C NMR (100.6 MHz, CD<sub>3</sub>CN): δ 185.4 (q, <sup>2</sup>J<sub>CF</sub> = 36.0 Hz, C=O), 158.4 (C-2), 149.6 (C-8a), 140.8 (C<sub>i</sub> from Ph), 140.7 (q, <sup>4</sup>J<sub>CF</sub> = 3.0 Hz, C-4), 134.3 (C-8), 130.3 (C-6), 130.2 (C<sub>p</sub> from Ph, C-7), 130.1 (C<sub>o</sub> from Ph), 129.6 (C<sub>m</sub> from Ph), 129.1 (C-5), 126.4 (C-4a), 126.0 (C-3), 117.1 (q, <sup>1</sup>J<sub>CF</sub> = 291.7 Hz, CF<sub>3</sub>) ppm.

<sup>19</sup>F NMR (376.5 MHz, CD<sub>3</sub>CN): δ -72.4 (CF<sub>3</sub>) ppm.

<sup>1</sup>H NMR (400.1 MHz, CDCl<sub>3</sub>): δ 8.59 (s, 1H, H-4), 8.21 (d, <sup>3</sup>J = 8.5 Hz, 1H, H-8), 7.97 (d, <sup>3</sup>J = 8.1 Hz, 1H, H-5), 7.91 (ptd, <sup>3</sup>J ~ 8 Hz, <sup>4</sup>J ~ 1 Hz, 1H, H-7), 7.68 (ptd, <sup>3</sup>J ~ 8 Hz, <sup>4</sup>J ~ 1 Hz, 1H, H-6), 7.59-7.57 (m, 2H, H<sub>o</sub> from Ph), 7.52-7.48 (m, 3H, H<sub>m,p</sub> from Ph) ppm.

<sup>13</sup>C NMR (100.6 MHz, CDCl<sub>3</sub>): δ 184.6 (q, <sup>2</sup>J<sub>CF</sub> = 36.0 Hz, C=O), 157.7 (C-2), 148.7 (C-8a), 139.3 (C<sub>i</sub> from Ph), 139.0 (q, <sup>4</sup>J<sub>CF</sub> = 3.0 Hz, C-4), 133.0 (C-8), 129.3 (C-6), 128.9 (C<sub>o</sub> from Ph), 128.8 (C<sub>m</sub> from Ph), 128.7 (C<sub>p</sub> from Ph, C-7), 127.9 (C-5), 125.9 (C-4a), 124.9 (C-3), 115.9 (q, <sup>1</sup>J<sub>CF</sub> = 292.1 Hz, CF<sub>3</sub>) ppm.

<sup>19</sup>F NMR (376.5 MHz, CDCl<sub>3</sub>): δ -73.7 (CF<sub>3</sub>) ppm.

HRMS (ESI-TOF): m/z [M+H]<sup>+</sup> Calcd for C<sub>17</sub>H<sub>11</sub>F<sub>3</sub>NO<sup>+</sup>: 302.0793; found: 302.0790.

<sup>5</sup> N. Sudhapriya, A. Nandakumar, P. T. Perumal, *RSC Advances*, 2014, **4**, 58476-58480.

### Hydrogenation of (3*R*\*,4*aR*)-1-phenyl-3-(trifluoromethyl)-3*H*,4*aH*-[1,3]oxazino[3,2-*a*]quinolin-3-ol (**3a**)

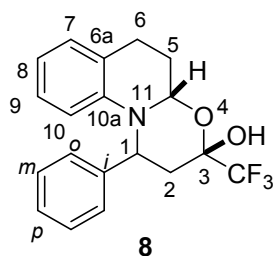

to form **8** and **9**. Three-necked round bottomed flask was charged with oxazine **3a** (0.105 g, 0.304 mmol), 10% Pd on carbon (0.032 g, 0.03 mmol, 10 mol%) and THF (5 mL). The flask was evacuated and flushed with H<sub>2</sub> from a balloon. The solution formed was stirred 36 h and filtered off. The filter cake was washed with EtOAc (3\*3 mL), the volatiles were evaporated in vacuo. The residue was passed through a short silica gel pad using heptane followed by heptane-EtOAc (10:1) as an eluents. Evaporation of the volatiles afforded a mixture **8** and **9** (75:25) as a colorless oil, yield 0.077 g (72%).

### (3*R*\*,4*aR*\*)-1-Phenyl-3-(trifluoromethyl)-2,3,4*a*,5-tetrahydro-1*H*,6*H*-[1,3]oxazino[3,2-*a*]quinolin-3-ol

**(8)**. <sup>1</sup>H NMR (400.13 MHz, CDCl<sub>3</sub>): δ 7.44-7.29 (m, 5H, Ph), 7.08 (d, <sup>3</sup>J = 7.3 Hz, 1H, H-7), 7.01 (pseudo-t, <sup>3</sup>J ~ 8 Hz, 1H, H-9), 6.76 (pseudo-t, <sup>3</sup>J ~ 7 Hz, 1H, H-8), 6.40 (d, <sup>3</sup>J = 8.1 Hz, 1H, H-10), 5.53 (br s, 1H, H-4*a*), 4.98 (dd, <sup>3</sup>J = 11.8 Hz, <sup>3</sup>J = 7.0 Hz, 1H, H-1), 3.10-2.93 (m, 1H), 2.79-2.67 (m, 3H), 2.37-2.30 (m, 1H), 2.33 (dd, <sup>3</sup>J = 14.4 Hz, <sup>3</sup>J = 11.8 Hz, 1H, H-2), 2.11-2.02 (m, 1H) ppm.

<sup>19</sup>F NMR (376.50 Hz, CDCl<sub>3</sub>): δ -88.0 (CF<sub>3</sub>) ppm;

<sup>13</sup>C NMR (100.16 Hz, CDCl<sub>3</sub>): δ 143.4 (C<sub>q</sub>), 142.2 (C<sub>q</sub>), 129.1 (C<sub>m</sub> from Ph), 128.5, 128.3, 127.5, 127.4, 127.0, 125.1 (C<sub>o</sub> from Ph), 123.2 (C<sub>q</sub>), 122.3 (q, <sup>1</sup>J<sub>CF</sub> = 285.5 Hz, CF<sub>3</sub>), 118.5, 112.9, 94.4 (q, <sup>2</sup>J<sub>CF</sub> = 31.5 Hz, C-3), 79.2 (C-4*a*), 55.5 (C-1), 33.4 (CH<sub>2</sub>), 25.9 (CH<sub>2</sub>), 21.6 (CH<sub>2</sub>) ppm.

HRMS (ESI-TOF): m/z [M+H]<sup>+</sup> Calcd for C<sub>19</sub>H<sub>18</sub>F<sub>3</sub>NO<sub>2</sub><sup>+</sup>: 350.1362; found: 350.1351.

### 4-(3,4-diHydroquinolin-1(2*H*)-yl)-1,1,1-trifluoro-4-phenylbutan-2-ol (**9**)

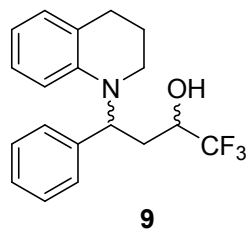

δ 7.44-7.29 (m, 5H, Ph), 6.64 (pseudo-t, <sup>3</sup>J ~ 7 Hz, 1H, H-8), 6.47 (d, <sup>3</sup>J = 8.1 Hz, 1H, H-10), 5.61-5.37 (m, 1H), 4.14-4.10 (m, 1H), 3.10-2.93 (m, 2H), 2.79-2.67 (m, 1H), 2.50-2.43 (m, 1H), 2.37-2.30 (m, 2H), 2.29-2.22 (m, 1H), 1.87-1.84 (m, 2H) ppm.

<sup>19</sup>F NMR (376.50 Hz, CDCl<sub>3</sub>): δ -80.8 (d, <sup>3</sup>J<sub>HF</sub> = 6.8 Hz CF<sub>3</sub>) ppm;

<sup>13</sup>C NMR (100.16 Hz, CDCl<sub>3</sub>): δ 145.8 (C<sub>q</sub>), 140.0 (C<sub>q</sub>), 129.7 (C<sub>m</sub> from Ph), 129.0, 127.4, 127.3, 125.5 (C<sub>o</sub> from Ph), 122.8 (C<sub>q</sub>), 125.4 (q, <sup>1</sup>J<sub>CF</sub> = 281.7 Hz, CF<sub>3</sub>), 116.2, 111.0, 67.7 (q, <sup>2</sup>J<sub>CF</sub> = 31.5 Hz, C-3), 54.3 (C-1), 42.1, 29.9 (CH<sub>2</sub>), 28.5 (CH<sub>2</sub>), 21.7 (CH<sub>2</sub>) ppm.

HRMS (ESI-TOF): m/z [M+H]<sup>+</sup> Calcd for C<sub>19</sub>H<sub>20</sub>F<sub>3</sub>NO<sup>+</sup>: 336.1570; found: 336.1560.

### Hydrogenation of (3*R*\*,4*aR*)-1-phenyl-3-(trifluoromethyl)-3*H*,4*aH*-[1,3]oxazino[3,2-*a*]quinolin-3-ol (**3a**)

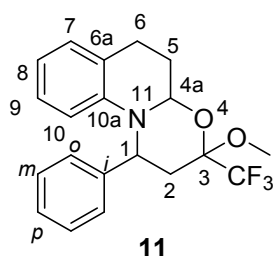

to form **11**. Three-necked round bottomed flask was charged with oxazine **3a** (0.105 g, 0.304 mmol), 10% Pd on carbon (0.034 g, 0.03 mmol, 10 mol%) and MeOH (5 mL). The flask was evacuated and flushed with H<sub>2</sub> from a balloon. The solution formed was stirred 36 h and filtered off. The filter cake was washed with EtOAc (3\*3 mL), the volatiles were evaporated in vacuo. The residue was passed

through a short silica gel pad using heptane followed by heptane-EtOAc (10:1) as an eluents. Compounds **10** and **11** were isolated as a separate fractions.

**3-Methoxy-1-phenyl-3-(trifluoromethyl)-4a,5-dihydro-3H,6H-[1,3]oxazino[3,2-a]quinoline (10).**

Colorless oil, yield 0.011 g (10%).

$^1\text{H}$  NMR (400.13 MHz,  $\text{CDCl}_3$ ):  $\delta$  7.39-7.27 (m, 5H, Ph), 7.11-7.09 (m, 1H), 6.84-6.78 (m, 2H), 6.22-6.20 (m, 1H), 5.60 (br s, 1H, H-4a), 5.33 (t,  $^3J = 7.7$  Hz, 1H), 3.52 (s, 1H, MeO), 2.81-2.63 (m, 3H), 1.92-1.82 (m, 1H) ppm.

$^{19}\text{F}$  NMR (376.50 Hz,  $\text{CDCl}_3$ ):  $\delta$  -81.5 ( $\text{CF}_3$ ) ppm;

$^{13}\text{C}$  NMR (100.16 Hz,  $\text{CDCl}_3$ ):  $\delta$  149.3, 138.8, 134.7, 130.3, 129.6, 128.6, 127.1, 126.8, 122.4 (q,  $^1J_{\text{CF}} = 286.9$  Hz,  $\text{CF}_3$ ), 121.5, 120.2, 105.6, 95.7 (q,  $^2J_{\text{CF}} = 31.8$  Hz, C-3), 83.0 (C-4a), 50.8 (MeO), 29.4 ( $\text{CH}_2$ ), 24.7 ( $\text{CH}_2$ ) ppm.

HRMS (ESI-TOF):  $m/z$   $[\text{M}+\text{H}]^+$  Calcd for  $\text{C}_{20}\text{H}_{19}\text{F}_3\text{NO}_2^+$ : 362.1362; found: 362.1357.

**3-Methoxy-1-phenyl-3-(trifluoromethyl)-2,3,4a,5-tetrahydro-1H,6H-[1,3]oxazino[3,2-a]quinoline (11).**

A colorless oil solidifies at standing, m.p. 142-143 °C, yield 0.093 g (84%).  $^1\text{H}$  NMR (400.13 MHz,  $\text{CDCl}_3$ ):  $\delta$  7.41-7.29 (m, 5H, Ph), 7.05 (d,  $^3J = 7.3$  Hz, 1H, H-7), 6.99 (pseudo-t,  $^3J \sim 8$  Hz, 1H, H-9), 6.73 (pseudo-t,  $^3J \sim 7$  Hz, 1H, H-8), 6.39 (d,  $^3J = 8.1$  Hz, 1H, H-10), 5.52 (br s, 1H, H-4a), 4.90 (dd,  $^3J = 11.9$  Hz,  $^3J = 7.0$  Hz, 1H, H-1), 3.29 (s, 1H, MeO), 3.14-3.06 (m, 1H), 2.78-2.68 (m, 1H), 2.59 (dd,  $^3J = 14.3$  Hz,  $^3J = 7.0$  Hz, 1H, H-2), 2.45-2.39 (m, 1H), 2.33 (dd,  $^3J = 14.3$  Hz,  $^3J = 11.9$  Hz, 1H, H-2), 2.12-2.03 (m, 1H) ppm.

$^{19}\text{F}$  NMR (376.50 Hz,  $\text{CDCl}_3$ ):  $\delta$  -83.1 ( $\text{CF}_3$ ) ppm;

$^{13}\text{C}$  NMR (100.16 Hz,  $\text{CDCl}_3$ ):  $\delta$  143.5 ( $\text{C}_q$ ), 142.3 ( $\text{C}_q$ ), 129.1 ( $\text{C}_m$  from Ph), 128.3, 127.5, 127.4, 125.2 ( $\text{C}_o$  from Ph), 122.8 ( $\text{C}_q$ ), 122.7 (q,  $^1J_{\text{CF}} = 289.3$  Hz,  $\text{CF}_3$ ), 118.3, 112.8, 95.8 (q,  $^2J_{\text{CF}} = 31.5$  Hz, C-3), 79.0 (C-4a), 55.8 (MeO), 50.5 (C-1), 34.6 ( $\text{CH}_2$ ), 26.3 ( $\text{CH}_2$ ), 22.3 ( $\text{CH}_2$ ) ppm.

HRMS (ESI-TOF):  $m/z$   $[\text{M}+\text{H}]^+$  Calcd for  $\text{C}_{20}\text{H}_{21}\text{F}_3\text{NO}_2^+$ : 364.1519; found: 364.1522.

|           |          |                |                                                                |
|-----------|----------|----------------|----------------------------------------------------------------|
| <b>FW</b> | 345.3152 | <b>Formula</b> | C <sub>19</sub> H <sub>14</sub> F <sub>3</sub> NO <sub>2</sub> |
|-----------|----------|----------------|----------------------------------------------------------------|

|                               |                                                               |                             |                      |                              |                      |
|-------------------------------|---------------------------------------------------------------|-----------------------------|----------------------|------------------------------|----------------------|
| <b>Acquisition Time (sec)</b> | 4.0894                                                        | <b>Comment</b>              | Imported from UXMNR. | <b>Date</b>                  | 22 Feb 2019 23:06:50 |
| <b>File Name</b>              | C:\BM_DATA\DOCS\Manuscr_UltraBM_2018\bm190222\BM-1499_001001r |                             |                      | <b>Frequency (MHz)</b>       | 400.13               |
| <b>Nucleus</b>                | 1H                                                            | <b>Number of Transients</b> | 8                    | <b>Original Points Count</b> | 32768                |
| <b>Pulse Sequence</b>         | zg30                                                          | <b>Solvent</b>              | ACETONITRILE-D3      | <b>Points Count</b>          | 131072               |
| <b>Temperature (degree C)</b> | 27.000                                                        |                             |                      | <b>Sweep Width (Hz)</b>      | 8012.82              |

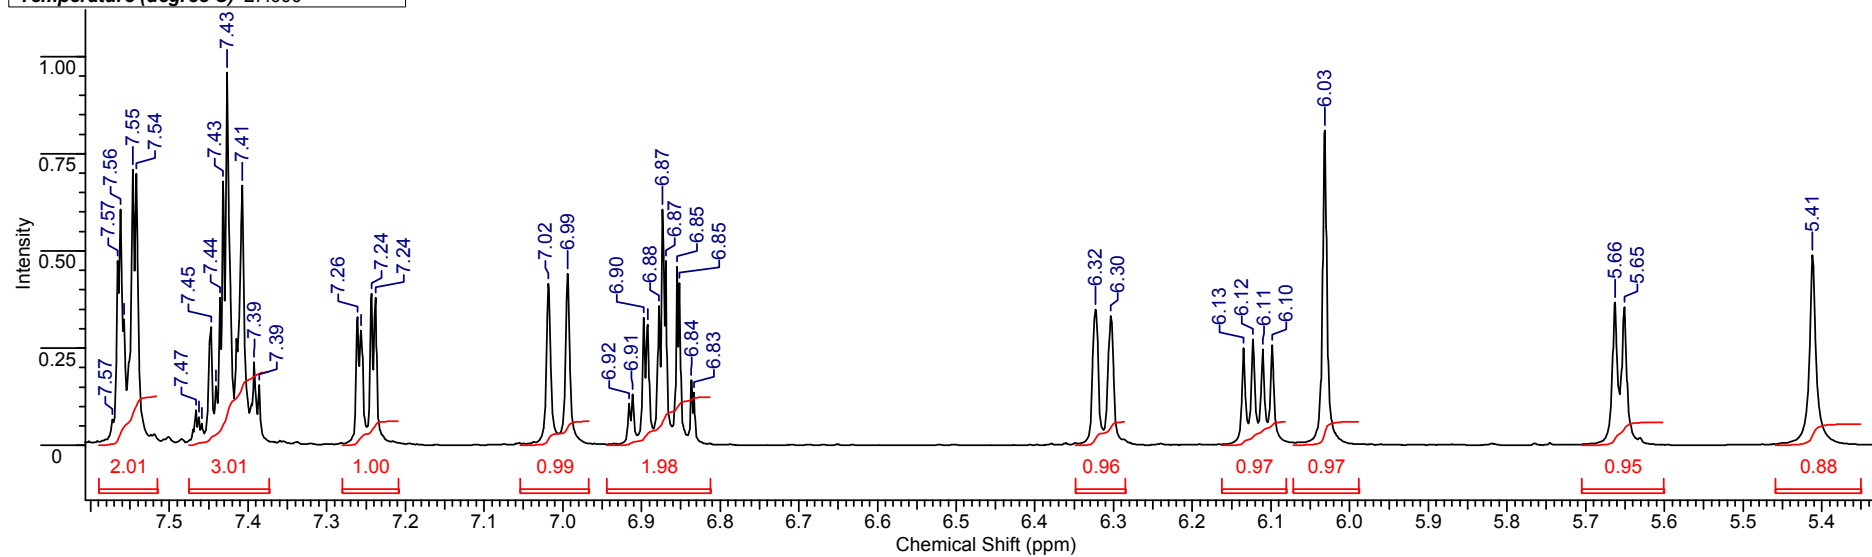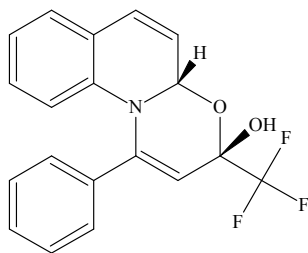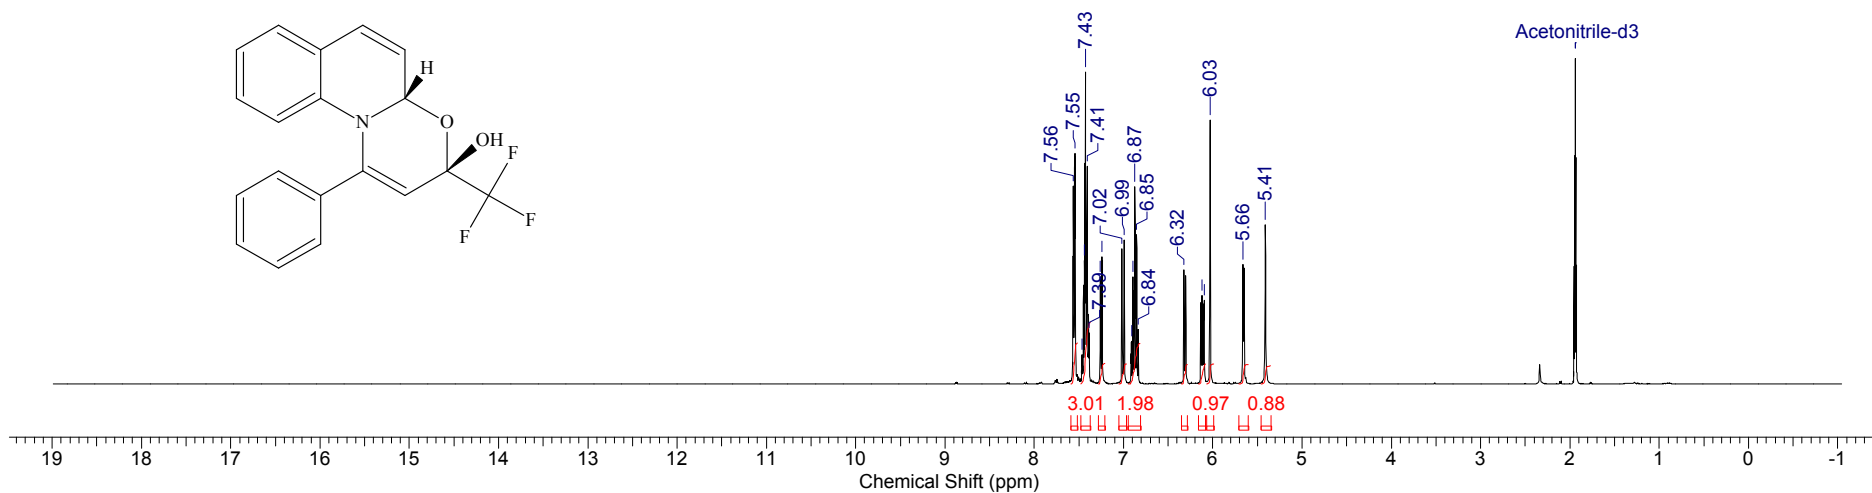

<sup>1</sup>H NMR spectrum of **3a** (400.1 MHz, CD<sub>3</sub>CN)

FW 345.3152 Formula C<sub>19</sub>H<sub>14</sub>F<sub>3</sub>NO<sub>2</sub>

|                        |        |                |                 |                      |                                                                   |                       |          |
|------------------------|--------|----------------|-----------------|----------------------|-------------------------------------------------------------------|-----------------------|----------|
| Acquisition Time (sec) | 1.9000 | Date           | Oct 1 2018      | File Name            | C:\DOCS\OUTPUT_301\F19\2018.10.01\BM-1371_20181001_01\FLUORINE_01 |                       |          |
| Frequency (MHz)        | 376.31 | Nucleus        | <sup>19</sup> F | Number of Transients | 16                                                                | Original Points Count | 169643   |
| Points Count           | 262144 | Pulse Sequence | s2pul           | Solvent              | DMSO-D6                                                           | Sweep Width (Hz)      | 89285.71 |
| Temperature (degree C) | 22.000 |                |                 |                      |                                                                   |                       |          |

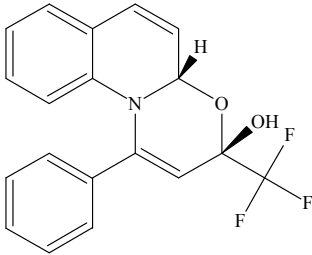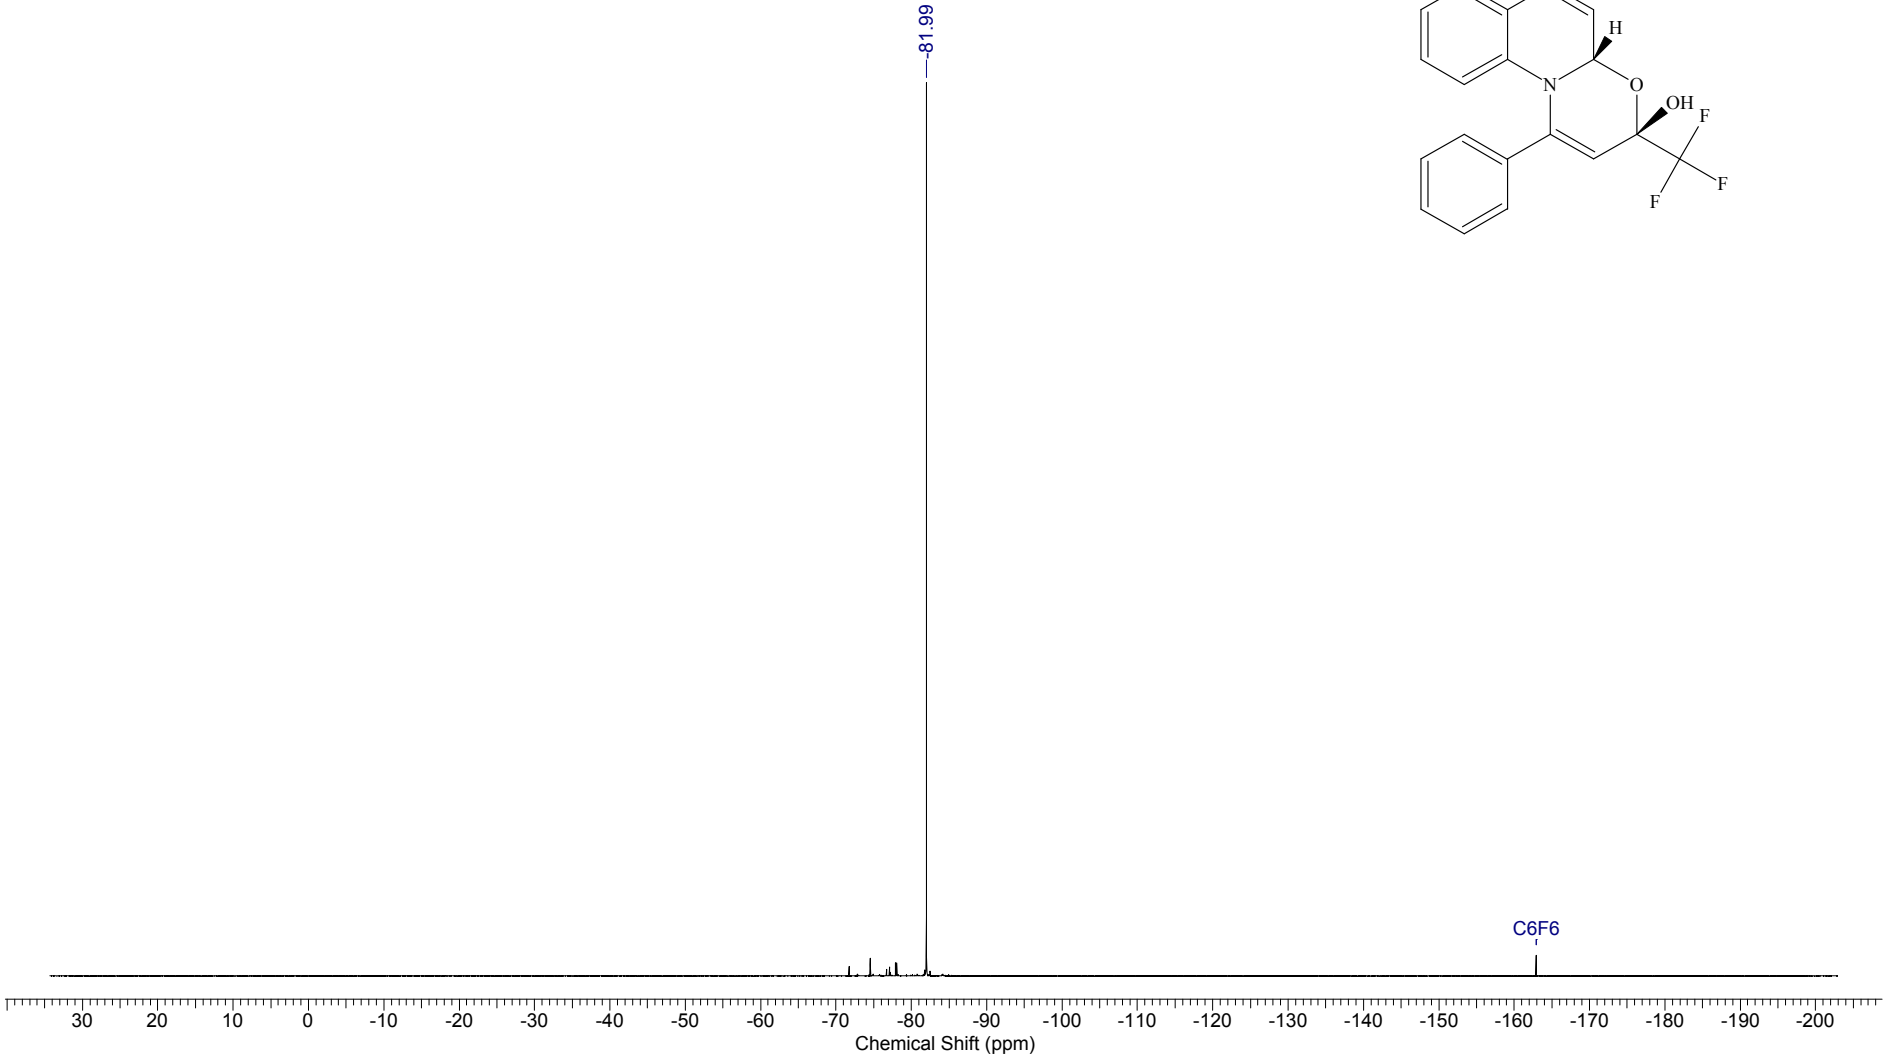

<sup>19</sup>F NMR spectrum of **3a** (376.5 MHz, CD<sub>3</sub>CN)

|                               |                                                           |                             |                      |                              |                      |
|-------------------------------|-----------------------------------------------------------|-----------------------------|----------------------|------------------------------|----------------------|
| <b>Acquisition Time (sec)</b> | 4.0894                                                    | <b>Comment</b>              | Imported from UXMNR. | <b>Date</b>                  | 24 Jul 2019 17:34:04 |
| <b>File Name</b>              | C:\DOCS\OUTPUT_301\2019\07.ep eu\190724\BM-1659-1_001001r |                             |                      | <b>Frequency (MHz)</b>       | 400.13               |
| <b>Nucleus</b>                | 1H                                                        | <b>Number of Transients</b> | 8                    | <b>Original Points Count</b> | 32768                |
| <b>Pulse Sequence</b>         | zg30                                                      | <b>Solvent</b>              | CHLOROFORM-D         | <b>Points Count</b>          | 131072               |
| <b>Temperature (degree C)</b> | 27.000                                                    |                             |                      | <b>Sweep Width (Hz)</b>      | 8012.82              |

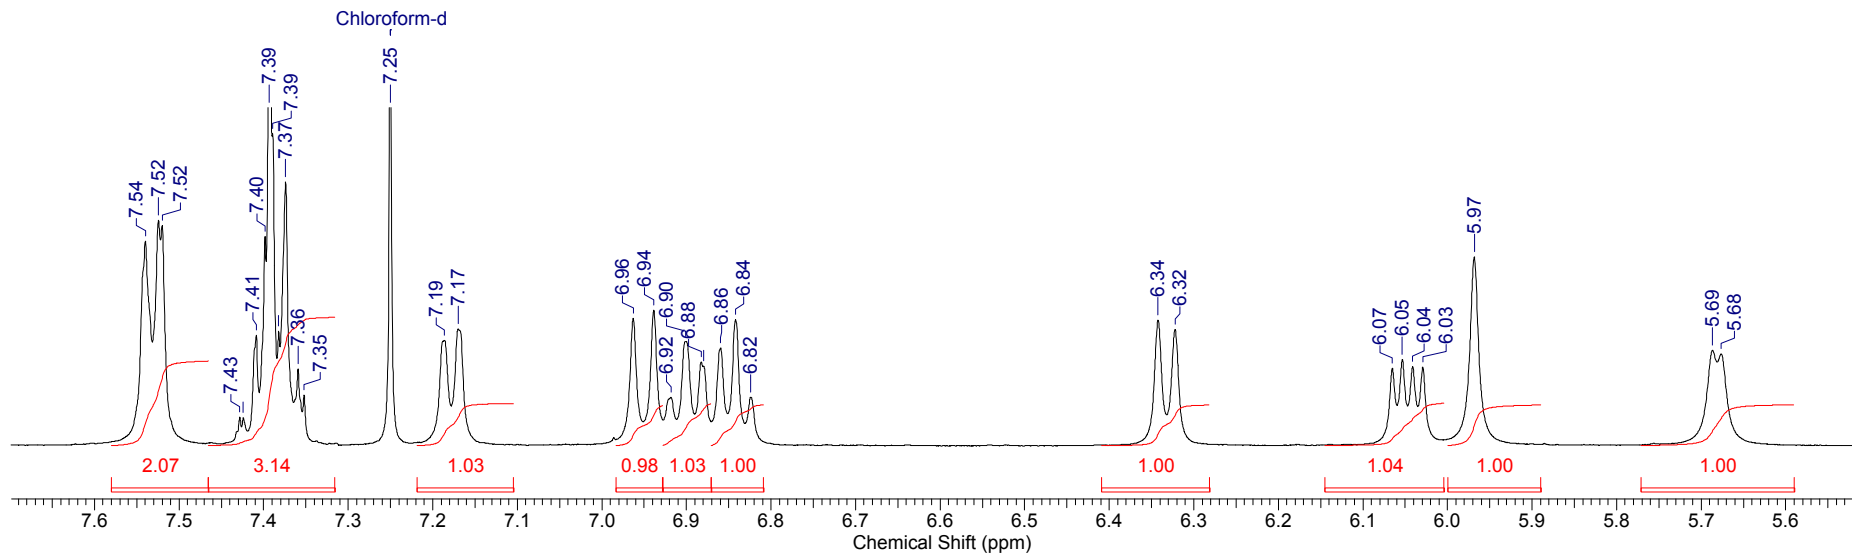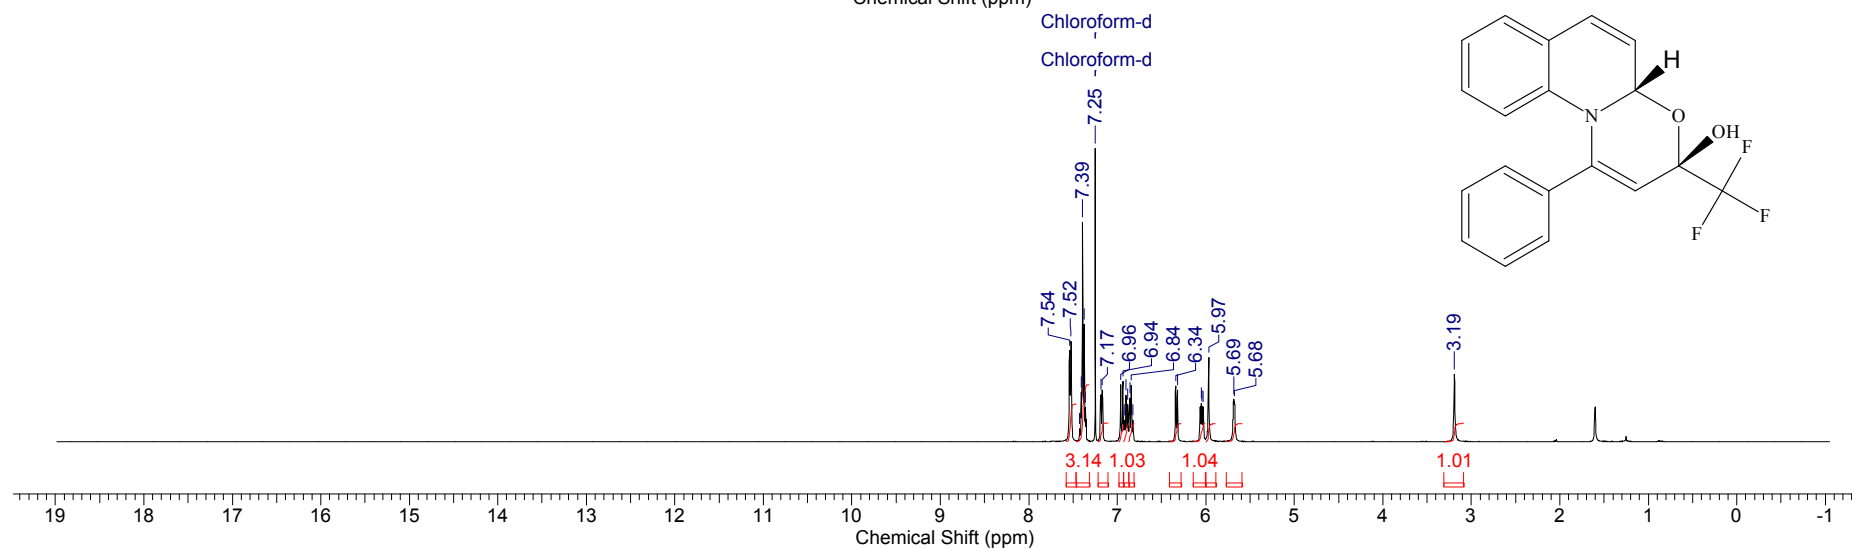

$^1\text{H}$  NMR spectrum of **3a** in multi gram scale synthesis (400.1 MHz,  $\text{CDCl}_3$ )

**FW** 359.3418 **Formula** C<sub>20</sub>H<sub>16</sub>F<sub>3</sub>NO<sub>2</sub>

|                               |                                                              |                             |                      |                              |                      |
|-------------------------------|--------------------------------------------------------------|-----------------------------|----------------------|------------------------------|----------------------|
| <b>Acquisition Time (sec)</b> | 4.0894                                                       | <b>Comment</b>              | Imported from UXMNR. | <b>Date</b>                  | 27 Sep 2018 19:18:46 |
| <b>File Name</b>              | C:\DOCS\OUTPUT_301\2018\09_naf_öyädü\BM-1372\BM-1372_001001r |                             |                      | <b>Frequency (MHz)</b>       | 400.13               |
| <b>Nucleus</b>                | 1H                                                           | <b>Number of Transients</b> | 8                    | <b>Original Points Count</b> | 32768                |
| <b>Pulse Sequence</b>         | zg30                                                         | <b>Solvent</b>              | ACETONITRILE-D3      | <b>Points Count</b>          | 131072               |
| <b>Temperature (degree C)</b> | 27.000                                                       |                             |                      | <b>Sweep Width (Hz)</b>      | 8012.82              |

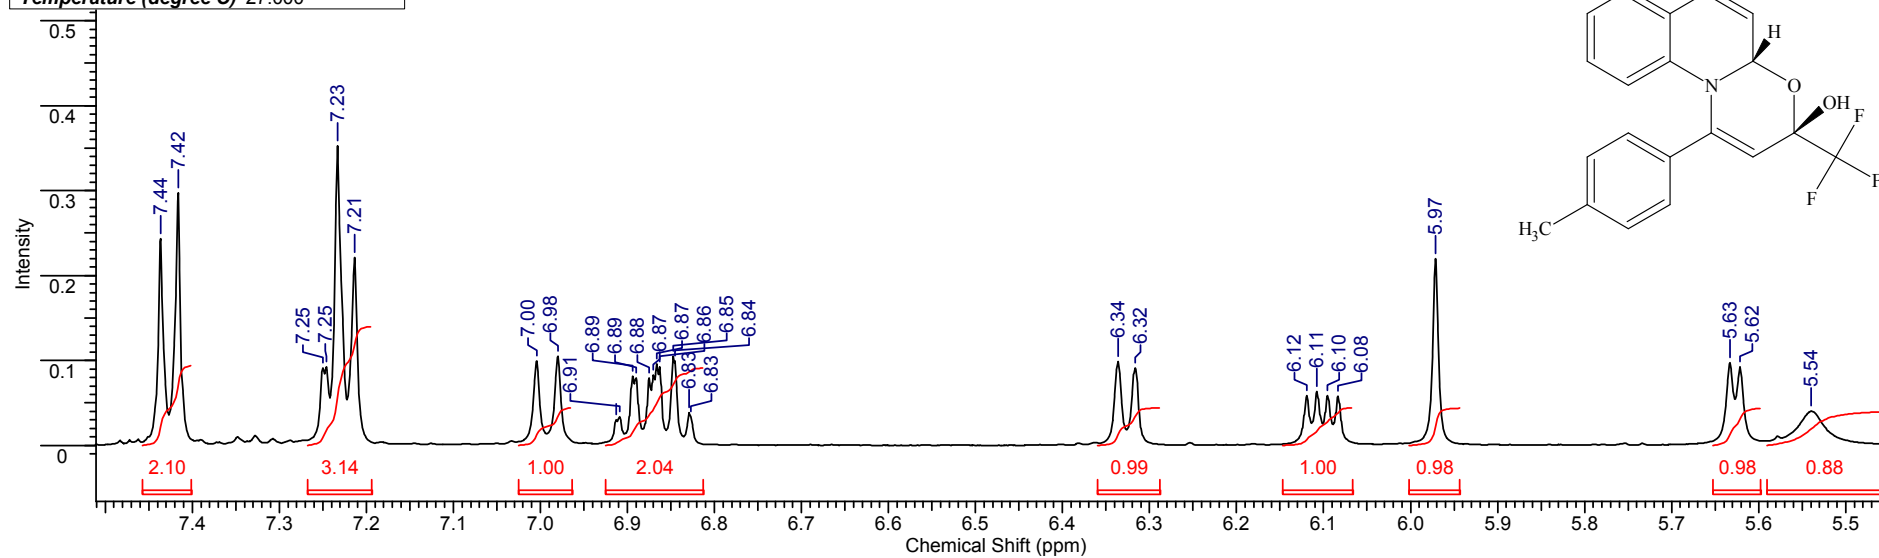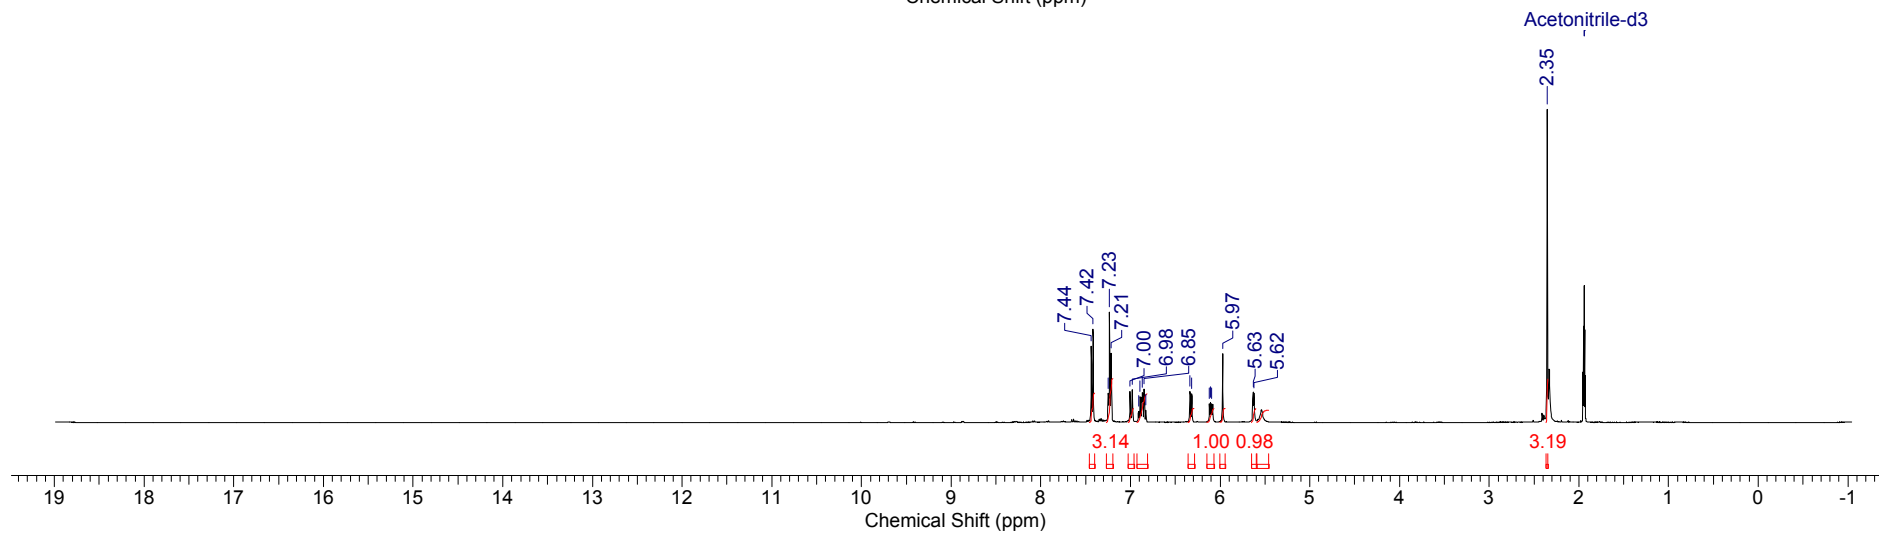

<sup>1</sup>H NMR spectrum of **3b** (400.1 MHz, CD<sub>3</sub>CN)



|           |          |                |                                                                |
|-----------|----------|----------------|----------------------------------------------------------------|
| <b>FW</b> | 359.3418 | <b>Formula</b> | C <sub>20</sub> H <sub>16</sub> F <sub>3</sub> NO <sub>2</sub> |
|-----------|----------|----------------|----------------------------------------------------------------|

|                               |          |                               |             |                             |                                                                   |                              |       |
|-------------------------------|----------|-------------------------------|-------------|-----------------------------|-------------------------------------------------------------------|------------------------------|-------|
| <b>Acquisition Time (sec)</b> | 1.0000   | <b>Date</b>                   | Sep 28 2018 | <b>File Name</b>            | C:\DOCS\OUTPUT_301\F19\2018.09.28\BM-1372_20180928_01\FLUORINE_01 |                              |       |
| <b>Frequency (MHz)</b>        | 376.31   | <b>Nucleus</b>                | 19F         | <b>Number of Transients</b> | 16                                                                | <b>Original Points Count</b> | 89286 |
| <b>Points Count</b>           | 131072   | <b>Pulse Sequence</b>         | s2pul       | <b>Solvent</b>              | ACETONITRILE-D3                                                   |                              |       |
| <b>Sweep Width (Hz)</b>       | 89285.71 | <b>Temperature (degree C)</b> | 22.000      |                             |                                                                   |                              |       |

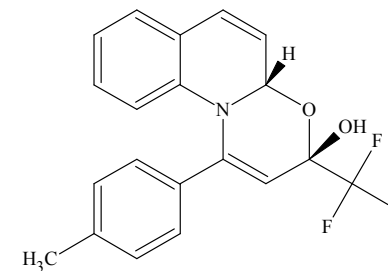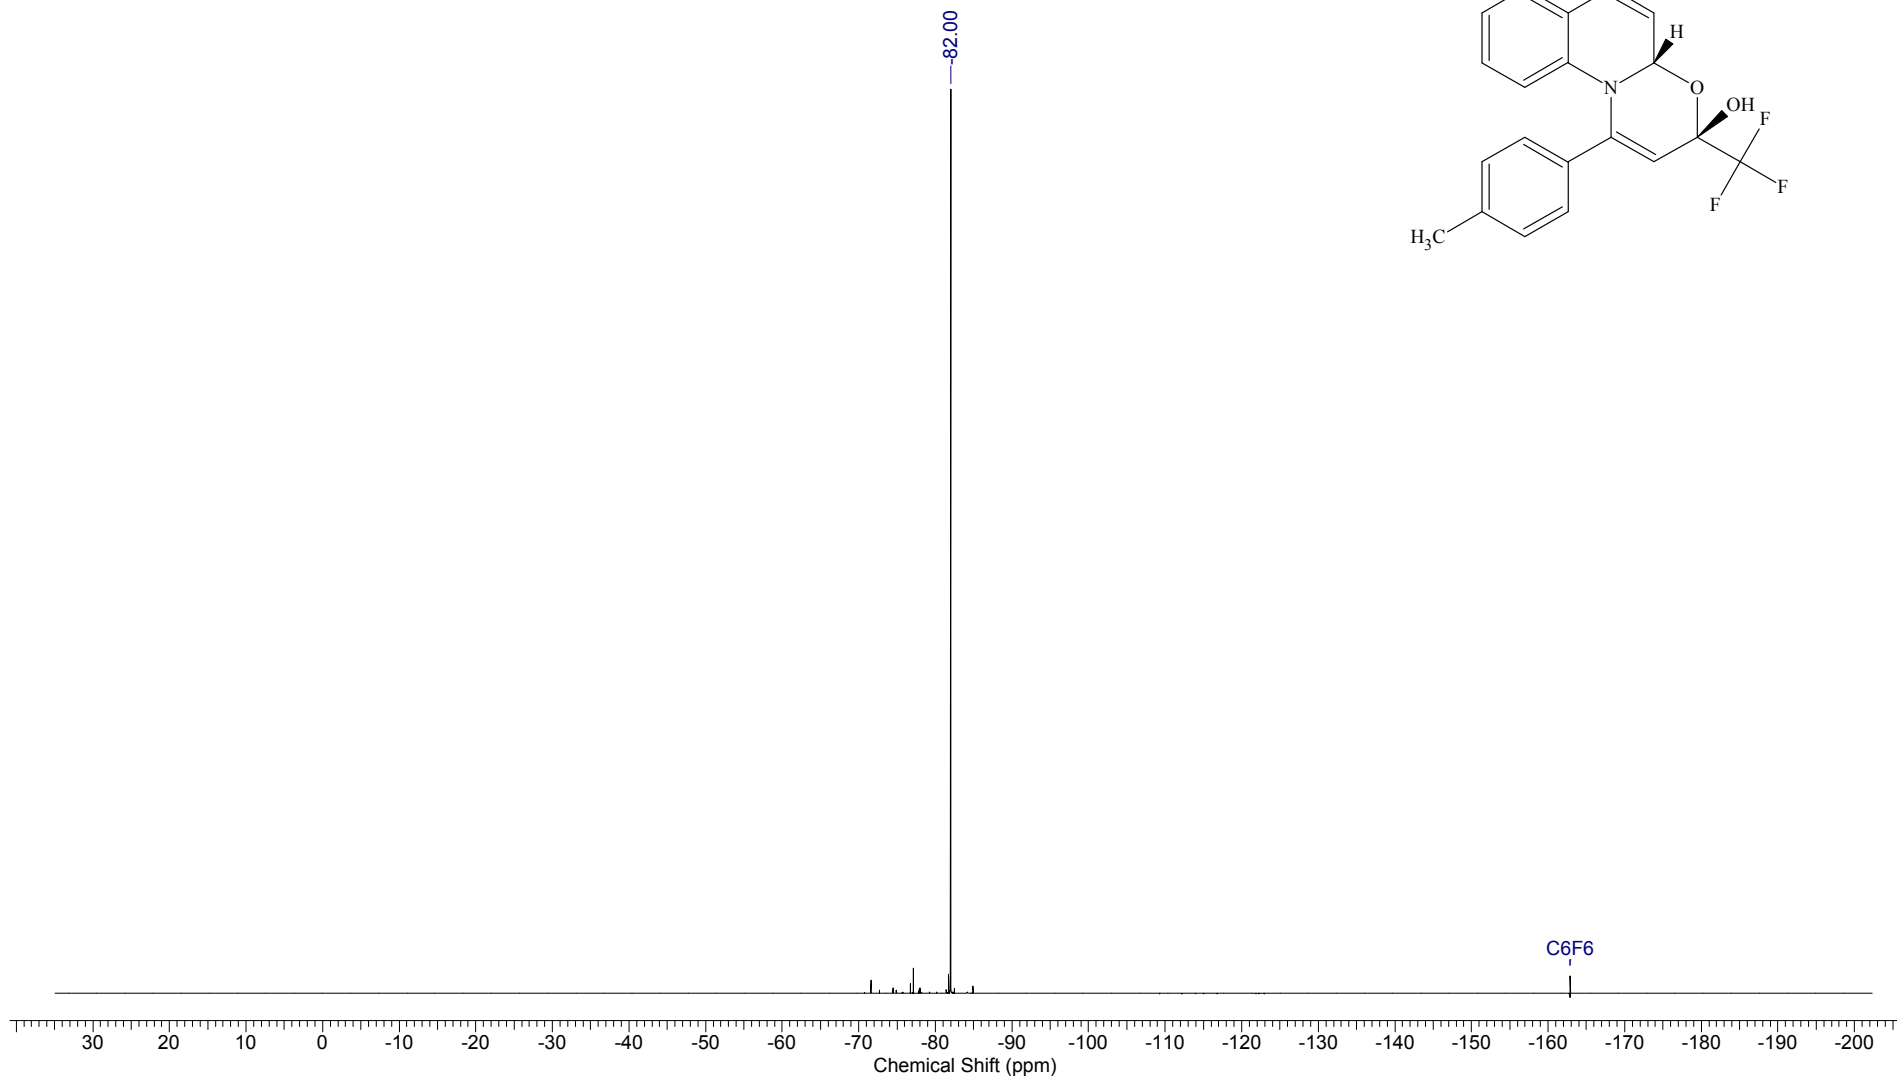

<sup>19</sup>F NMR spectrum of **3b** (376.5 MHz, CD<sub>3</sub>CN)

S17

FW 373.3684      Formula C<sub>21</sub>H<sub>18</sub>F<sub>3</sub>NO<sub>2</sub>

|                        |                                                               |                      |                      |                       |                      |
|------------------------|---------------------------------------------------------------|----------------------|----------------------|-----------------------|----------------------|
| Acquisition Time (sec) | 4.0894                                                        | Comment              | Imported from UXMNR. | Date                  | 17 Oct 2018 23:19:18 |
| File Name              | C:\DOCS\OUTPUT_301\2018\10\i-8y-4du\bm181017\BM-1397d_001001r |                      |                      | Frequency (MHz)       | 400.13               |
| Nucleus                | 1H                                                            | Number of Transients | 8                    | Original Points Count | 32768                |
| Pulse Sequence         | zg30                                                          | Solvent              | ACETONITRILE-D3      | Points Count          | 131072               |
| Temperature (degree C) | 27.000                                                        |                      |                      | Sweep Width (Hz)      | 8012.82              |

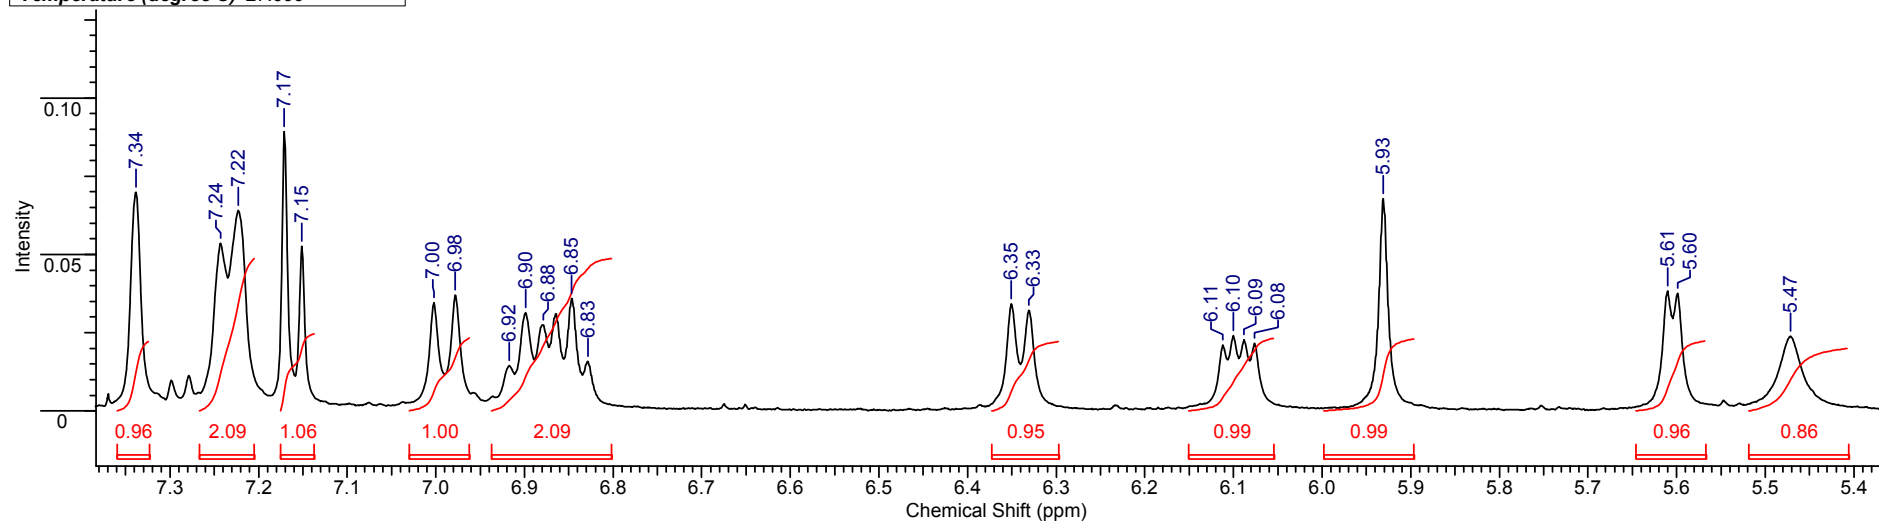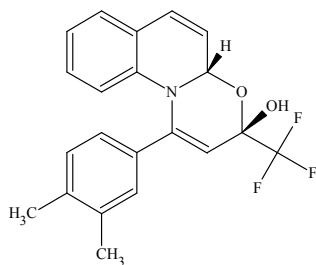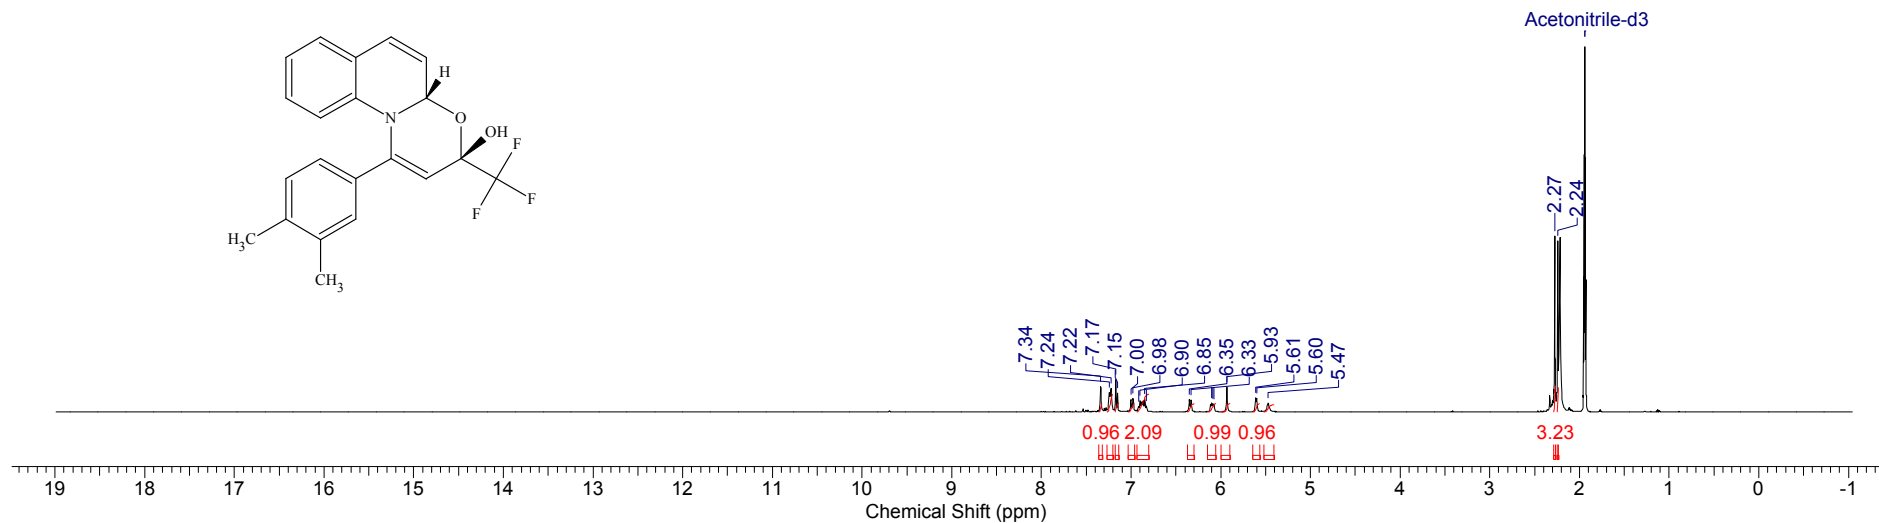

<sup>1</sup>H NMR spectrum of **3c** (400.1 MHz, CD<sub>3</sub>CN)

|           |          |                |                                                                |
|-----------|----------|----------------|----------------------------------------------------------------|
| <b>FW</b> | 373.3684 | <b>Formula</b> | C <sub>21</sub> H <sub>18</sub> F <sub>3</sub> NO <sub>2</sub> |
|-----------|----------|----------------|----------------------------------------------------------------|

|                               |           |                               |             |                             |                                                                      |                              |        |
|-------------------------------|-----------|-------------------------------|-------------|-----------------------------|----------------------------------------------------------------------|------------------------------|--------|
| <b>Acquisition Time (sec)</b> | 2.3069    | <b>Date</b>                   | Oct 18 2018 | <b>File Name</b>            | C:\DOCS\OUTPUT_301\F19\2018.10.18\BM-1397d-F_20181018_01\FLUORINE_01 |                              |        |
| <b>Frequency (MHz)</b>        | 376.32    | <b>Nucleus</b>                | 19F         | <b>Number of Transients</b> | 8                                                                    | <b>Original Points Count</b> | 262144 |
| <b>Points Count</b>           | 262144    | <b>Pulse Sequence</b>         | s2pul       | <b>Solvent</b>              | ACETONITRILE-D3                                                      |                              |        |
| <b>Sweep Width (Hz)</b>       | 113636.37 | <b>Temperature (degree C)</b> | 22.000      |                             |                                                                      |                              |        |

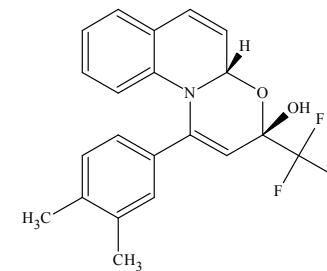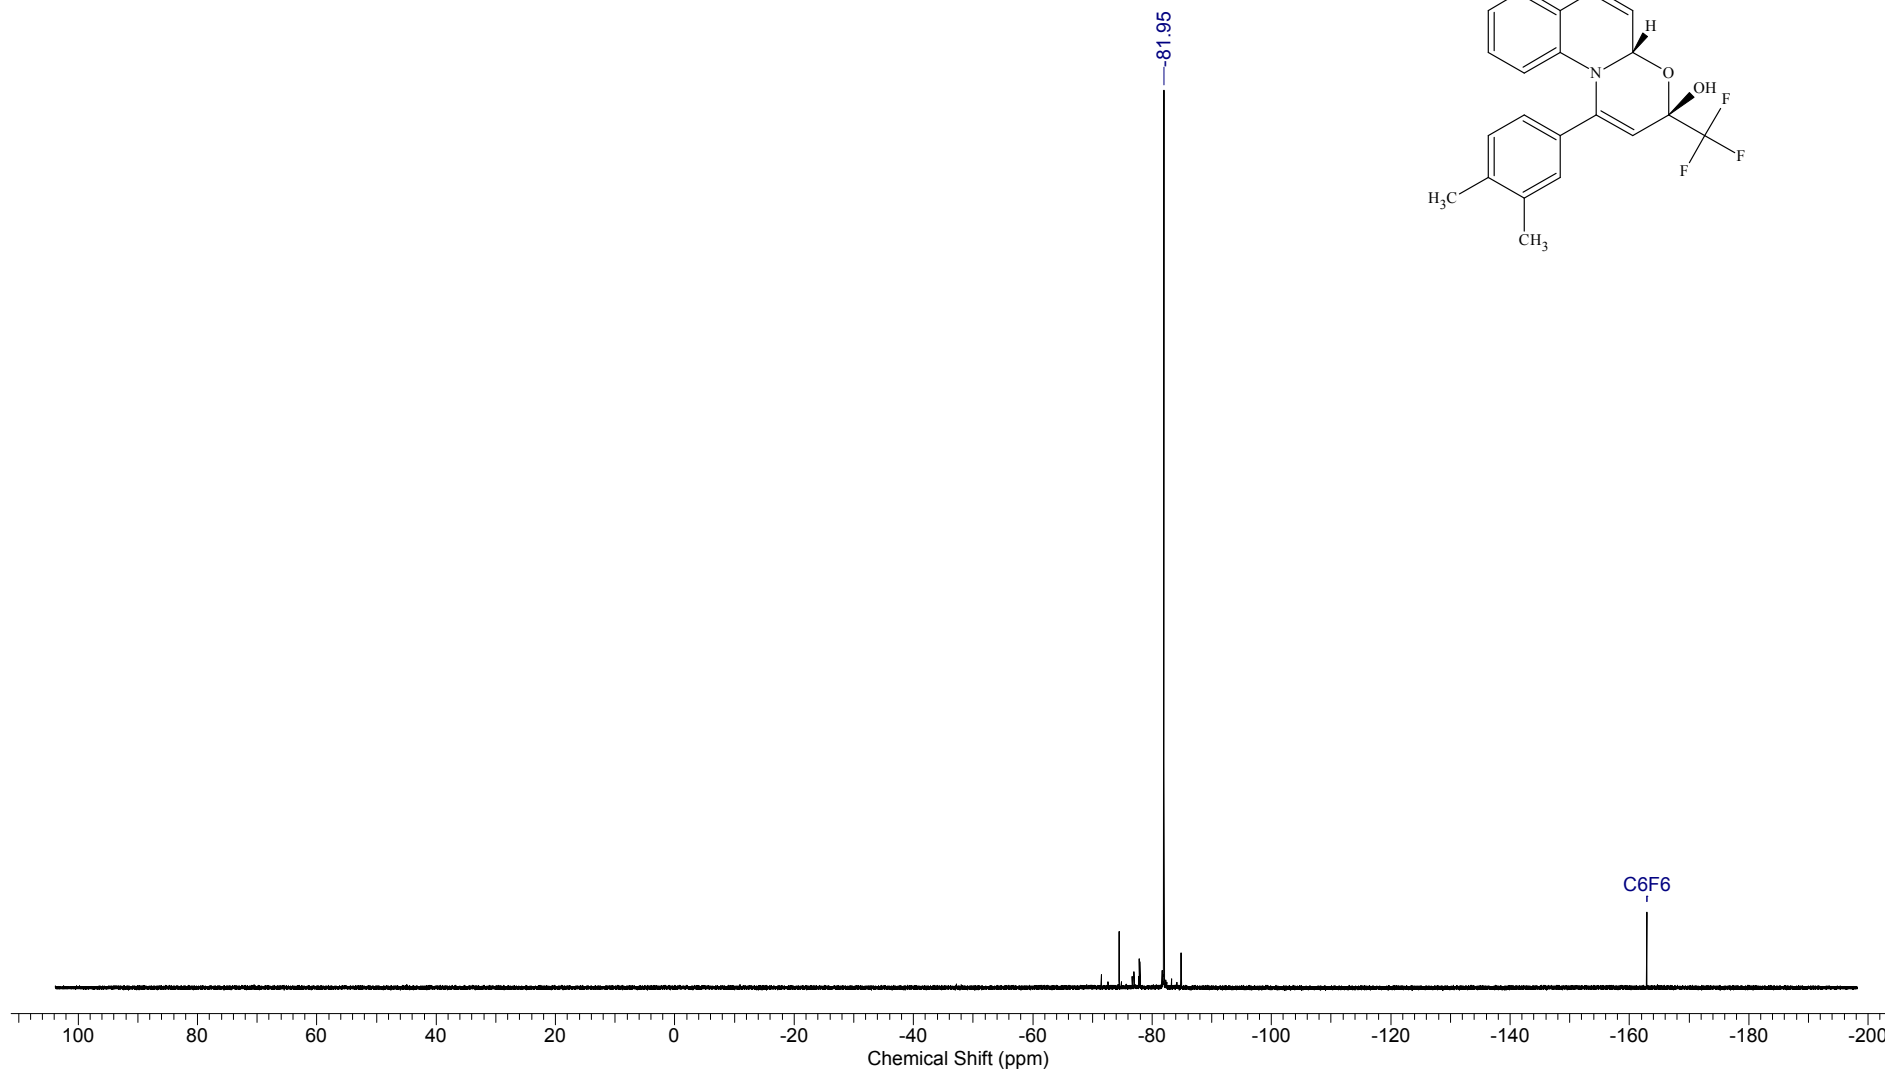

<sup>19</sup>F NMR spectrum of **3c** (376.5 MHz, CD<sub>3</sub>CN)

|                               |                                                        |                             |                                                                |                              |         |                     |       |
|-------------------------------|--------------------------------------------------------|-----------------------------|----------------------------------------------------------------|------------------------------|---------|---------------------|-------|
| <b>FW</b>                     | 401.4215                                               | <b>Formula</b>              | C <sub>23</sub> H <sub>22</sub> F <sub>3</sub> NO <sub>2</sub> |                              |         |                     |       |
| <b>Acquisition Time (sec)</b> | 2.5559                                                 | <b>Comment</b>              | Imported from UXMNR.                                           |                              |         |                     |       |
| <b>File Name</b>              | C:\DOCS\OUTPUT_301\2018\10.10\ááúú\BM-1377-2.H_001001r |                             | <b>Date</b>                                                    | 02 Oct 2018 15:32:08         |         |                     |       |
| <b>Nucleus</b>                | 1H                                                     | <b>Number of Transients</b> | 4                                                              | <b>Original Points Count</b> | 16384   | <b>Points Count</b> | 65536 |
| <b>Pulse Sequence</b>         | zg30                                                   | <b>Solvent</b>              | ACETONITRILE-D3                                                | <b>Sweep Width (Hz)</b>      | 6410.26 |                     |       |
| <b>Temperature (degree C)</b> | 27.000                                                 |                             |                                                                |                              |         |                     |       |

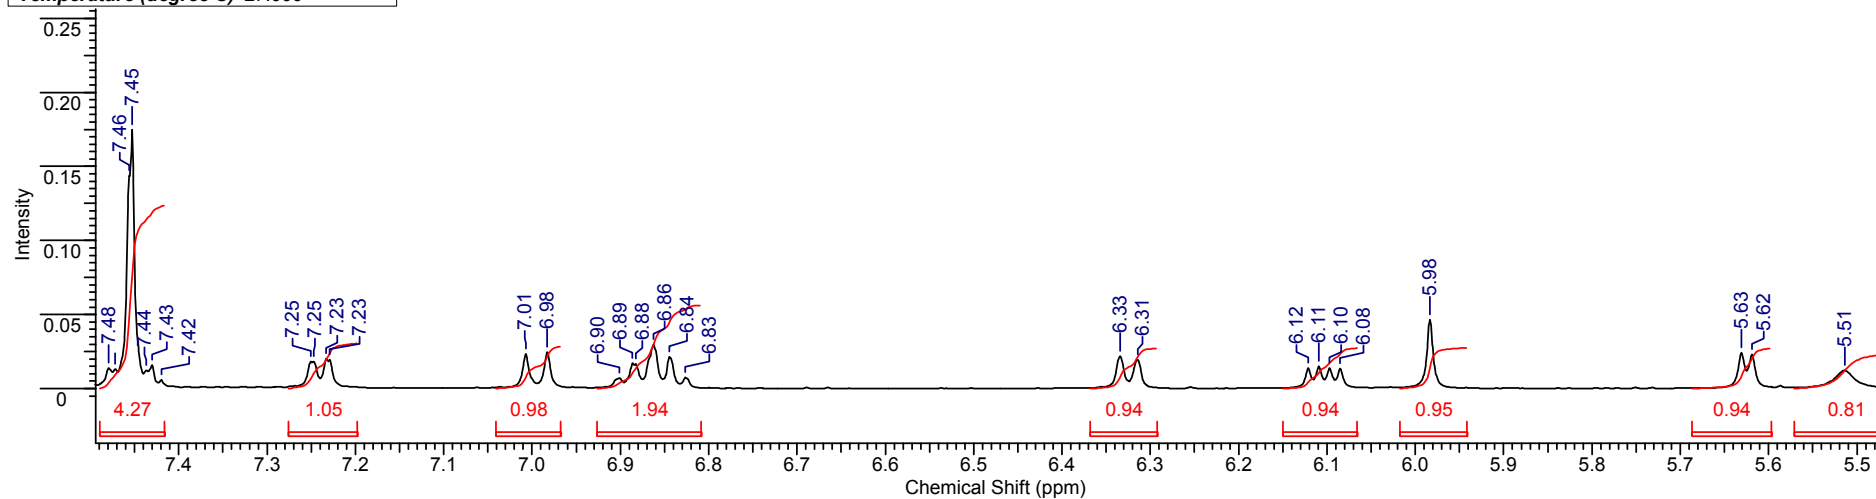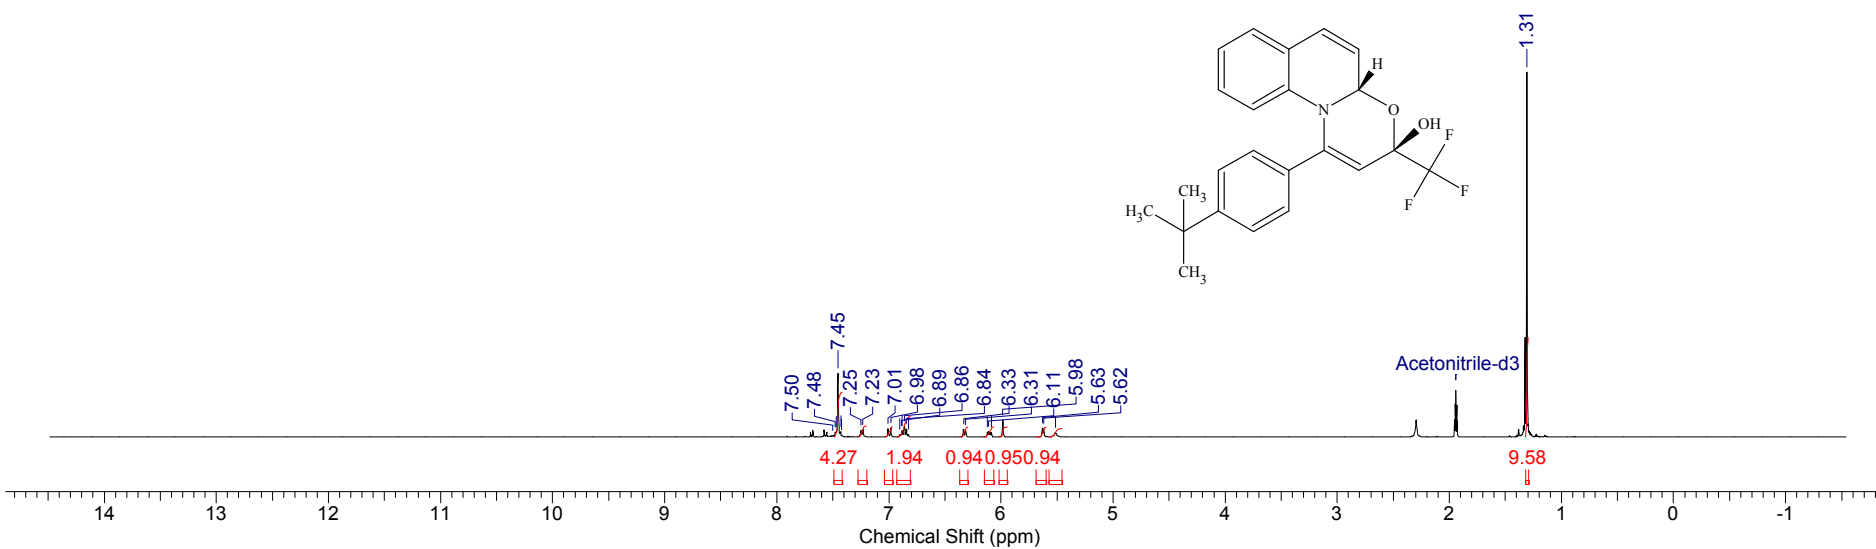

<sup>1</sup>H NMR spectrum of **3d** (400.1 MHz, CD<sub>3</sub>CN)

|           |          |                |                                                                |
|-----------|----------|----------------|----------------------------------------------------------------|
| <b>FW</b> | 401.4215 | <b>Formula</b> | C <sub>23</sub> H <sub>22</sub> F <sub>3</sub> NO <sub>2</sub> |
|-----------|----------|----------------|----------------------------------------------------------------|

|                               |           |                               |            |                             |                                                                     |                              |        |
|-------------------------------|-----------|-------------------------------|------------|-----------------------------|---------------------------------------------------------------------|------------------------------|--------|
| <b>Acquisition Time (sec)</b> | 2.3069    | <b>Date</b>                   | Oct 4 2018 | <b>File Name</b>            | C:\DOCS\OUTPUT_301\F19\2018.10.04\BM-1377-F_20181004_01\FLUORINE_01 |                              |        |
| <b>Frequency (MHz)</b>        | 376.32    | <b>Nucleus</b>                | 19F        | <b>Number of Transients</b> | 8                                                                   | <b>Original Points Count</b> | 262144 |
| <b>Points Count</b>           | 262144    | <b>Pulse Sequence</b>         | s2pul      | <b>Solvent</b>              | ACETONITRILE-D3                                                     |                              |        |
| <b>Sweep Width (Hz)</b>       | 113636.37 | <b>Temperature (degree C)</b> | 22.000     |                             |                                                                     |                              |        |

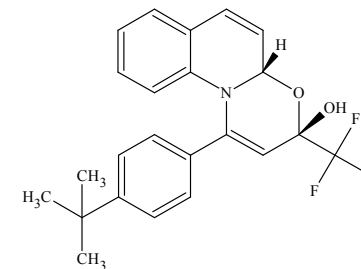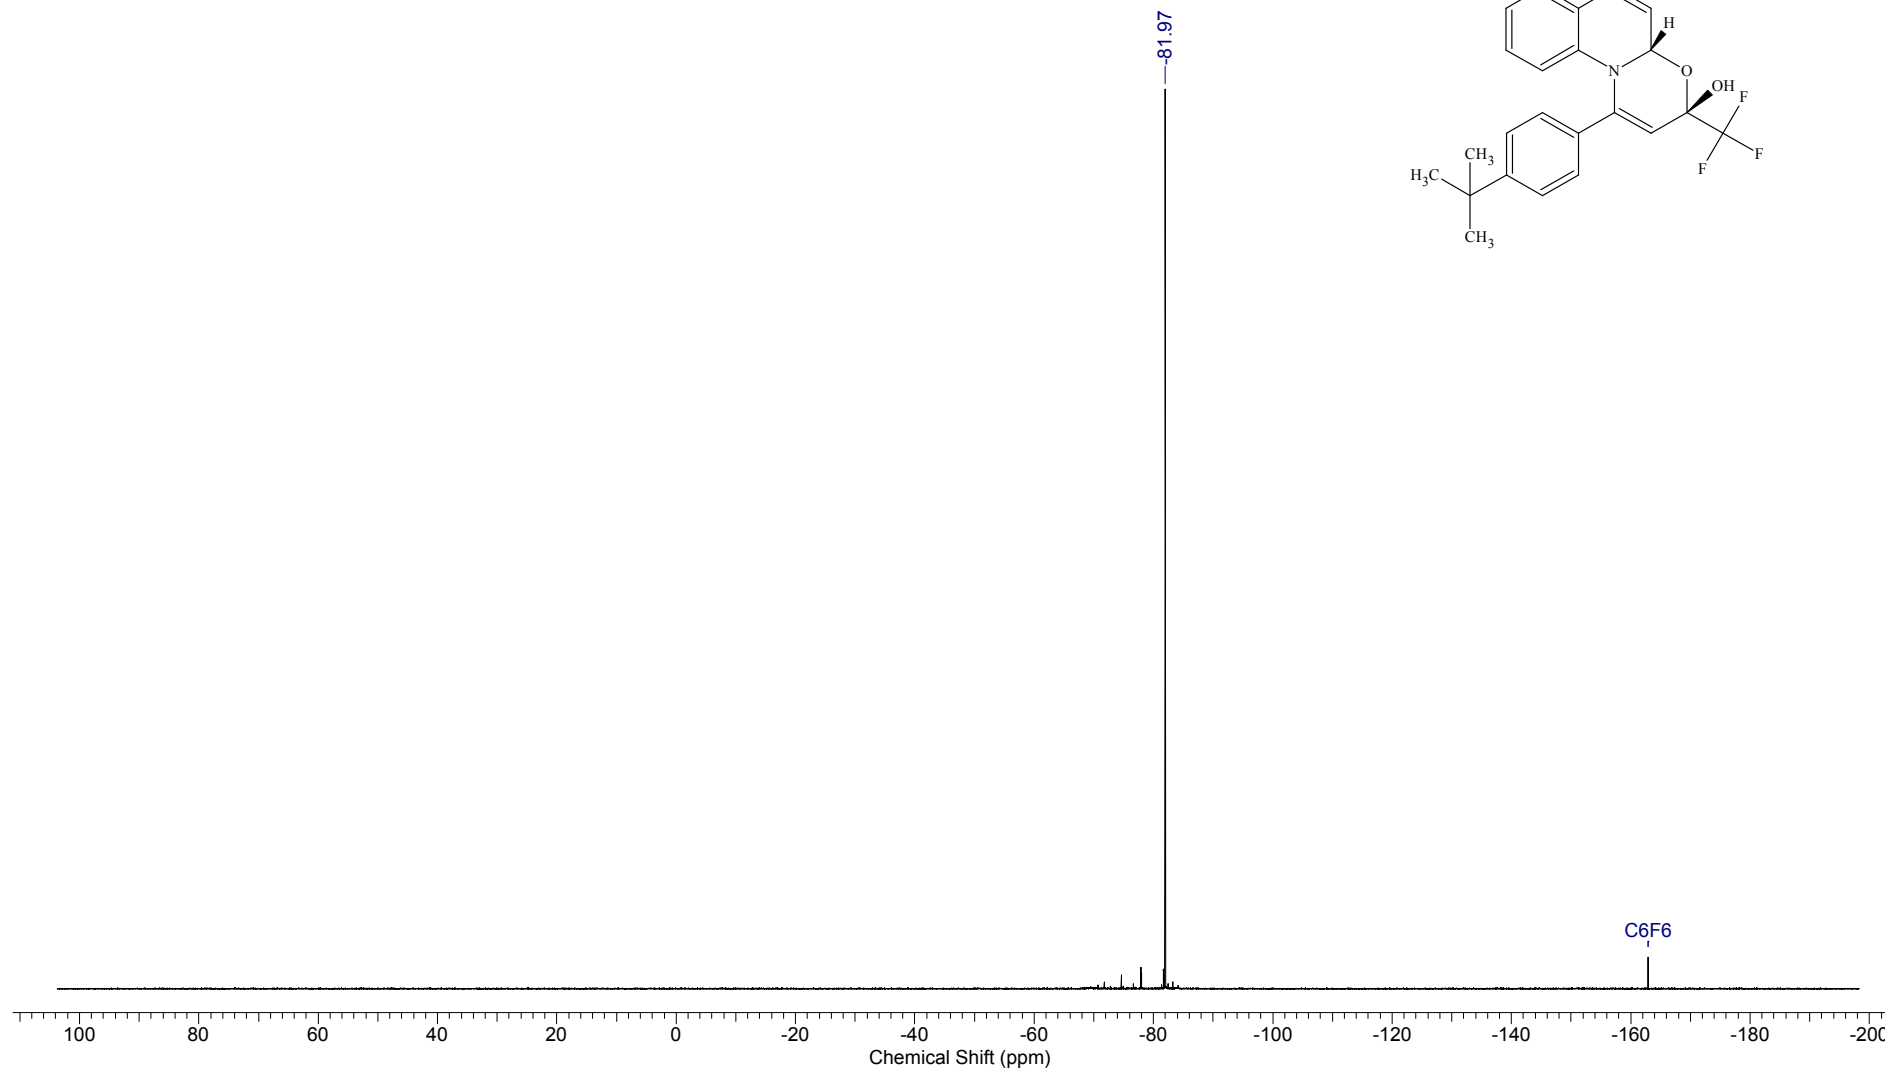

<sup>19</sup>F NMR spectrum of **3d** (376.5 MHz, CD<sub>3</sub>CN)

FW 375.3412 Formula  $C_{20}H_{16}F_3NO_3$

|                        |                                                        |                      |                      |                       |                      |
|------------------------|--------------------------------------------------------|----------------------|----------------------|-----------------------|----------------------|
| Acquisition Time (sec) | 2.5559                                                 | Comment              | Imported from UXNMR. | Date                  | 29 Sep 2018 14:08:28 |
| File Name              | C:\DOCS\OUTPUT_301\2018\09_nai_öyädü\BM-1373.H_001001r |                      |                      | Frequency (MHz)       | 400.13               |
| Nucleus                | 1H                                                     | Number of Transients | 4                    | Original Points Count | 16384                |
| Pulse Sequence         | zg30                                                   | Solvent              | ACETONITRILE-D3      | Points Count          | 65536                |
| Temperature (degree C) | 27.000                                                 |                      |                      | Sweep Width (Hz)      | 6410.26              |

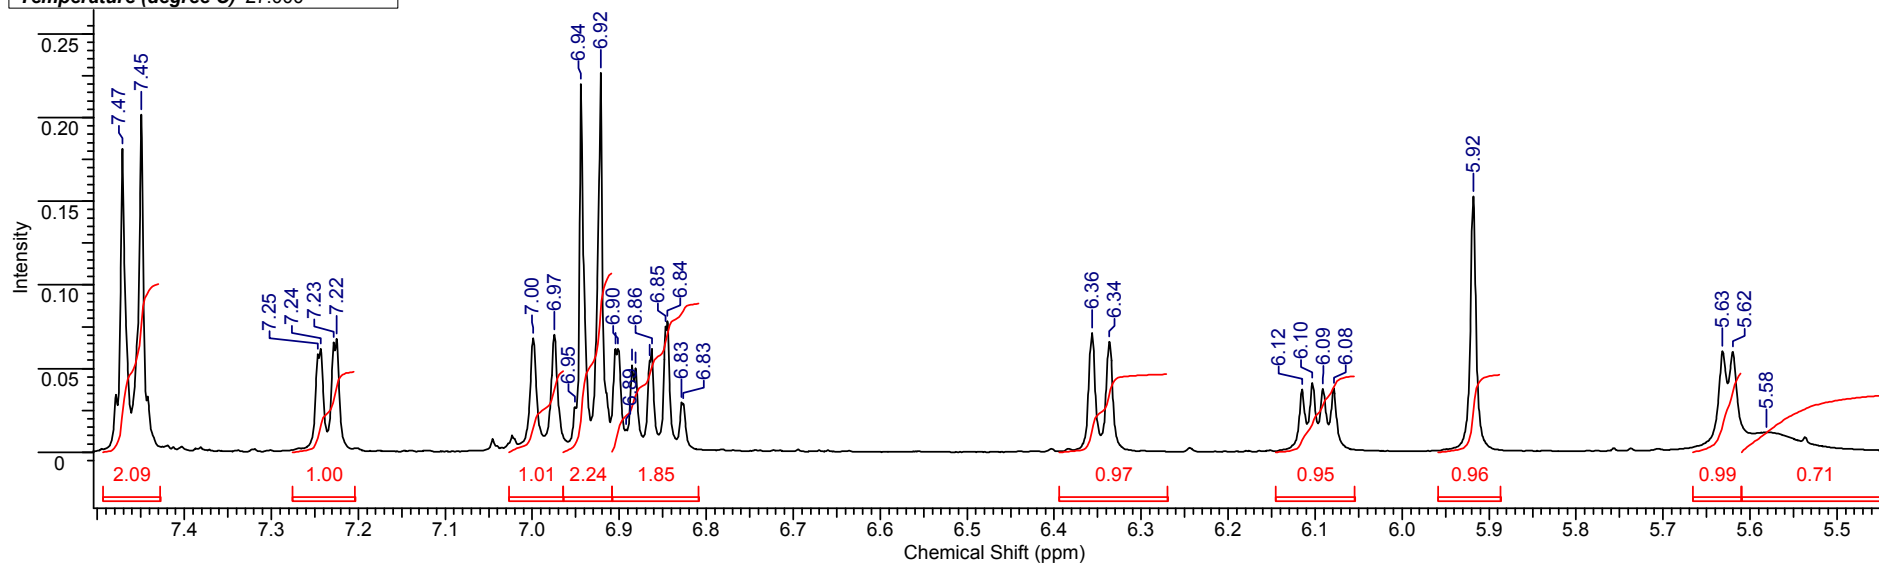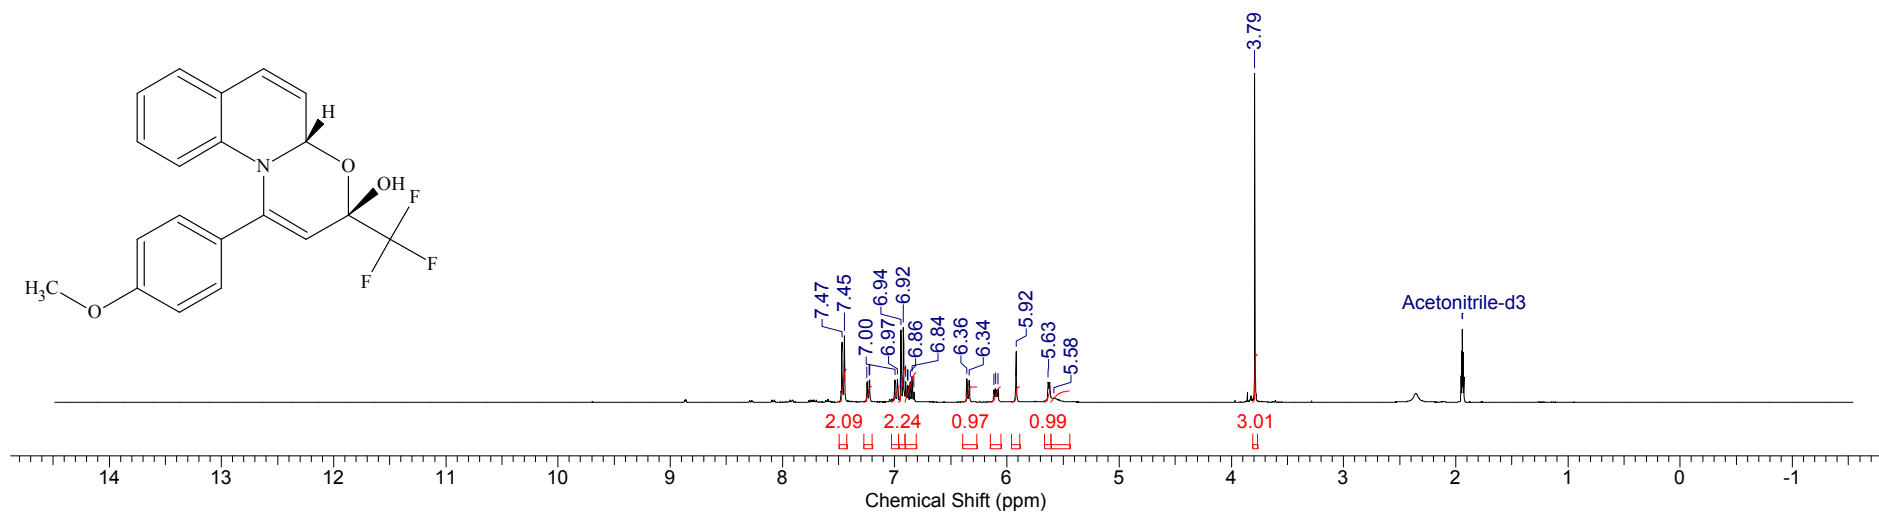

$^1H$  NMR spectrum of **3e** (400.1 MHz,  $CD_3CN$ )

FW 375.3412 Formula C<sub>20</sub>H<sub>16</sub>F<sub>3</sub>NO<sub>3</sub>

|                        |        |                |                 |                      |                                                                   |                       |          |
|------------------------|--------|----------------|-----------------|----------------------|-------------------------------------------------------------------|-----------------------|----------|
| Acquisition Time (sec) | 1.9000 | Date           | Oct 1 2018      | File Name            | C:\DOCS\OUTPUT_301\F19\2018.10.01\BM-1373_20181001_01\FLUORINE_01 |                       |          |
| Frequency (MHz)        | 376.31 | Nucleus        | <sup>19</sup> F | Number of Transients | 16                                                                | Original Points Count | 169643   |
| Points Count           | 262144 | Pulse Sequence | s2pul           | Solvent              | DMSO-D6                                                           | Sweep Width (Hz)      | 89285.71 |
| Temperature (degree C) | 22.000 |                |                 |                      |                                                                   |                       |          |

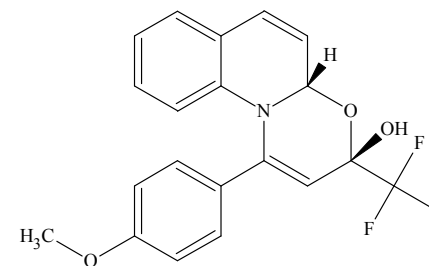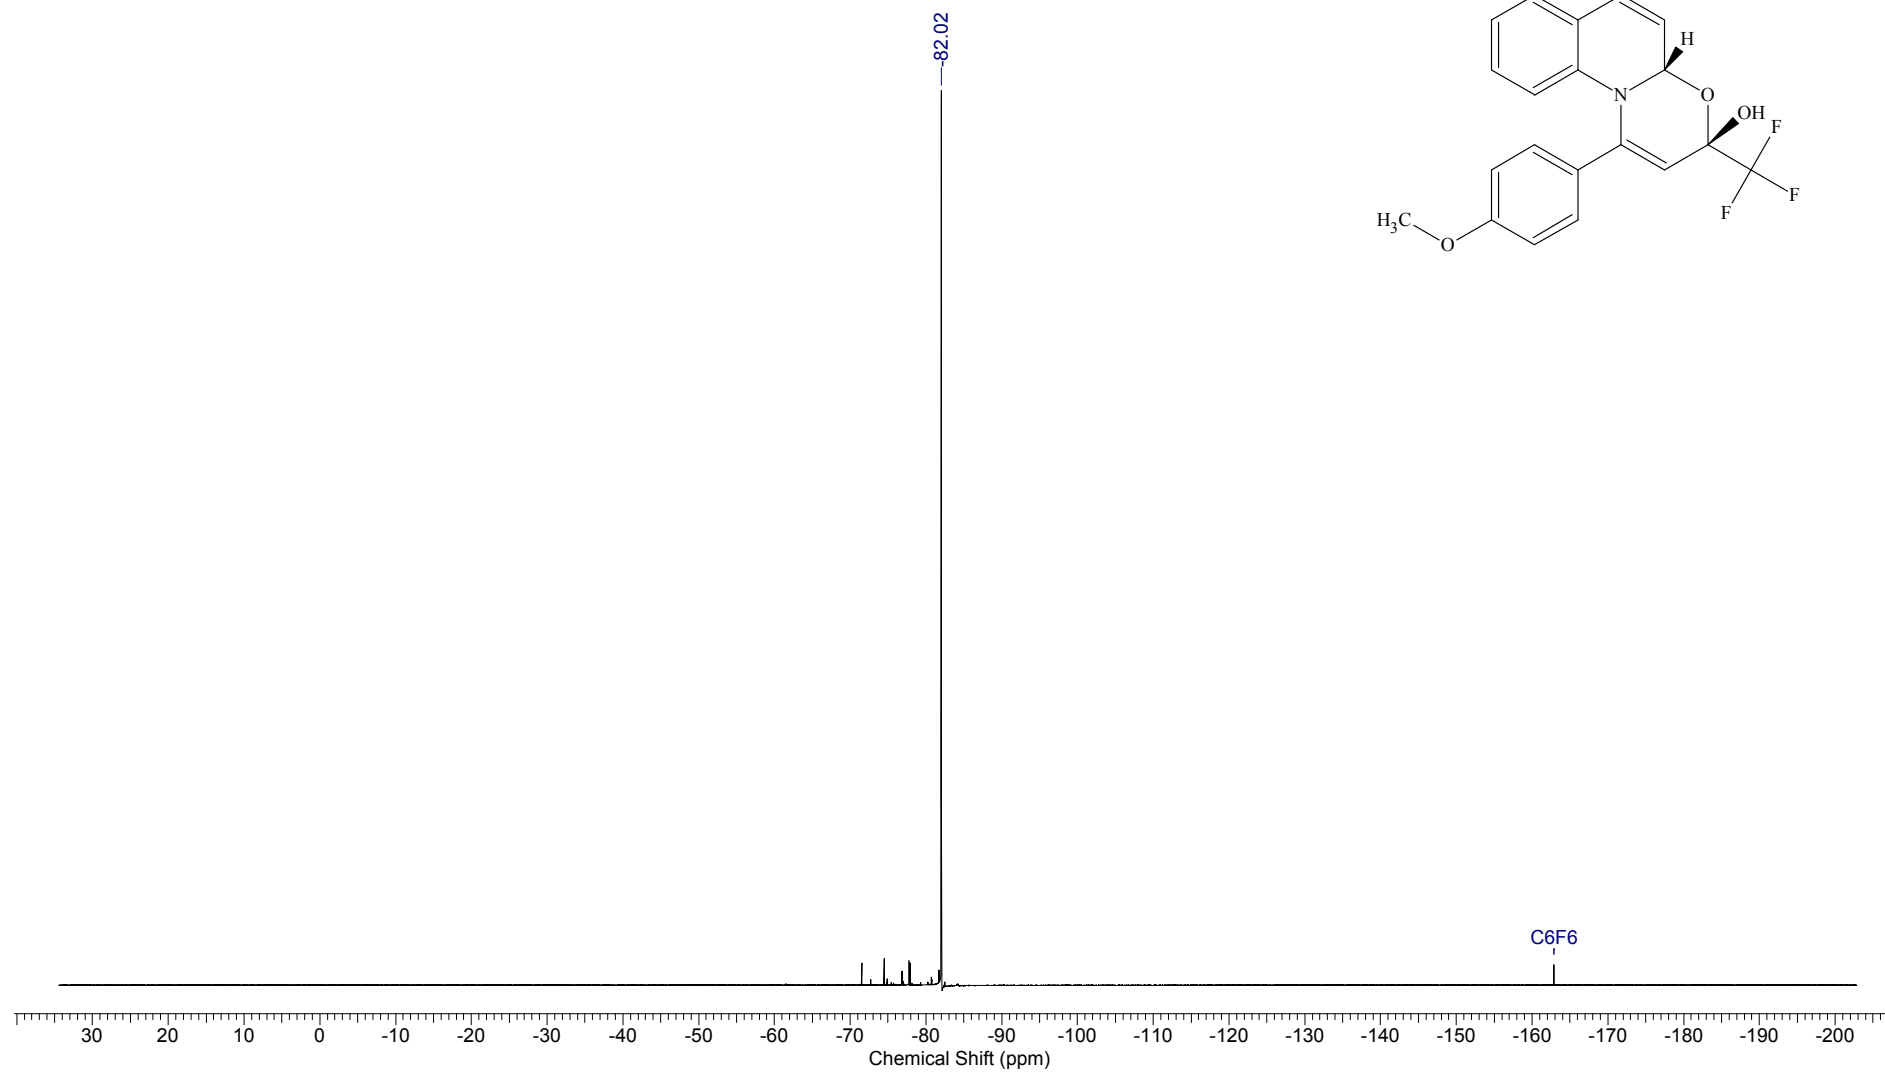

<sup>19</sup>F NMR spectrum of **3e** (376.5 MHz, CD<sub>3</sub>CN)

|           |          |                |                                                                  |
|-----------|----------|----------------|------------------------------------------------------------------|
| <b>FW</b> | 391.4078 | <b>Formula</b> | C <sub>20</sub> H <sub>16</sub> F <sub>3</sub> NO <sub>2</sub> S |
|-----------|----------|----------------|------------------------------------------------------------------|

|                               |                                                    |                             |                      |                              |                      |
|-------------------------------|----------------------------------------------------|-----------------------------|----------------------|------------------------------|----------------------|
| <b>Acquisition Time (sec)</b> | 2.5559                                             | <b>Comment</b>              | Imported from UXMNR. | <b>Date</b>                  | 02 Oct 2018 15:34:56 |
| <b>File Name</b>              | C:\DOCS\OUTPUT_301\2018\10.10\3f\BM-1378.H_001001r |                             |                      | <b>Frequency (MHz)</b>       | 400.13               |
| <b>Nucleus</b>                | 1H                                                 | <b>Number of Transients</b> | 4                    | <b>Original Points Count</b> | 16384                |
| <b>Pulse Sequence</b>         | zg30                                               | <b>Solvent</b>              | ACETONITRILE-D3      | <b>Sweep Width (Hz)</b>      | 6410.26              |
| <b>Temperature (degree C)</b> | 27.000                                             |                             |                      |                              |                      |

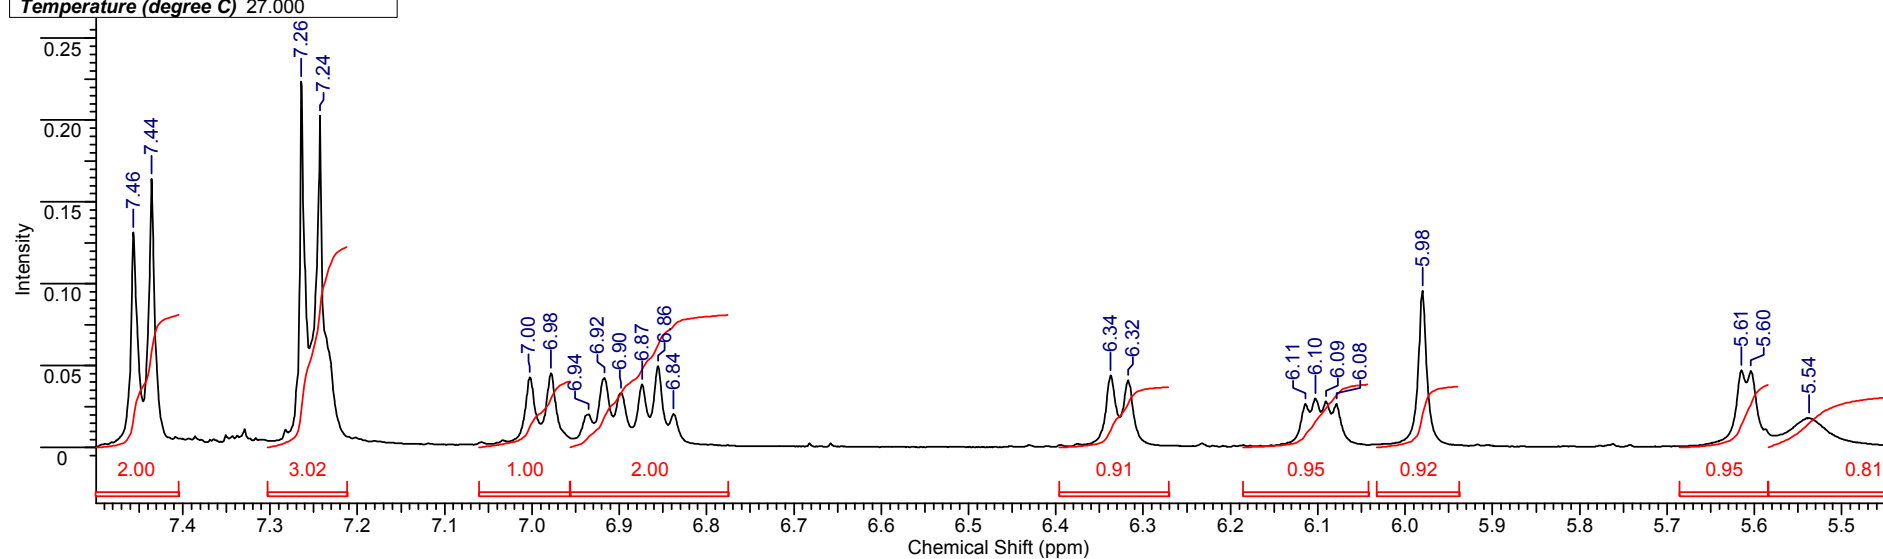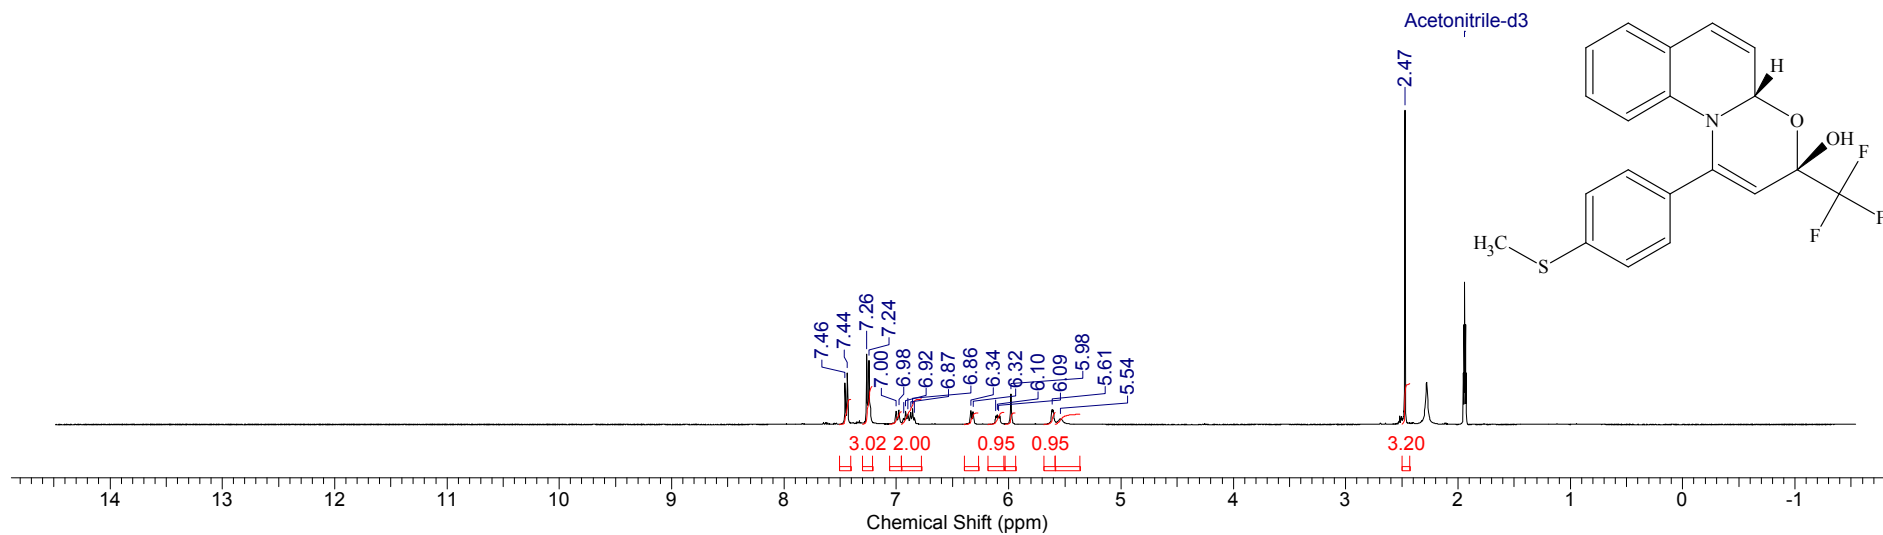

<sup>1</sup>H NMR spectrum of **3f** (400.1 MHz, CD<sub>3</sub>CN)



|           |          |                |                                                                  |
|-----------|----------|----------------|------------------------------------------------------------------|
| <b>FW</b> | 391.4078 | <b>Formula</b> | C <sub>20</sub> H <sub>16</sub> F <sub>3</sub> NO <sub>2</sub> S |
|-----------|----------|----------------|------------------------------------------------------------------|

|                               |           |                               |            |                             |                                                                     |                              |        |
|-------------------------------|-----------|-------------------------------|------------|-----------------------------|---------------------------------------------------------------------|------------------------------|--------|
| <b>Acquisition Time (sec)</b> | 2.3069    | <b>Date</b>                   | Oct 4 2018 | <b>File Name</b>            | C:\DOCS\OUTPUT_301\F19\2018.10.04\BM-1378-F_20181004_01\FLUORINE_01 |                              |        |
| <b>Frequency (MHz)</b>        | 376.32    | <b>Nucleus</b>                | 19F        | <b>Number of Transients</b> | 8                                                                   | <b>Original Points Count</b> | 262144 |
| <b>Points Count</b>           | 262144    | <b>Pulse Sequence</b>         | s2pul      | <b>Solvent</b>              | ACETONITRILE-D3                                                     |                              |        |
| <b>Sweep Width (Hz)</b>       | 113636.37 | <b>Temperature (degree C)</b> | 22.000     |                             |                                                                     |                              |        |

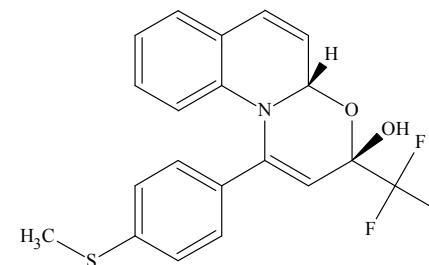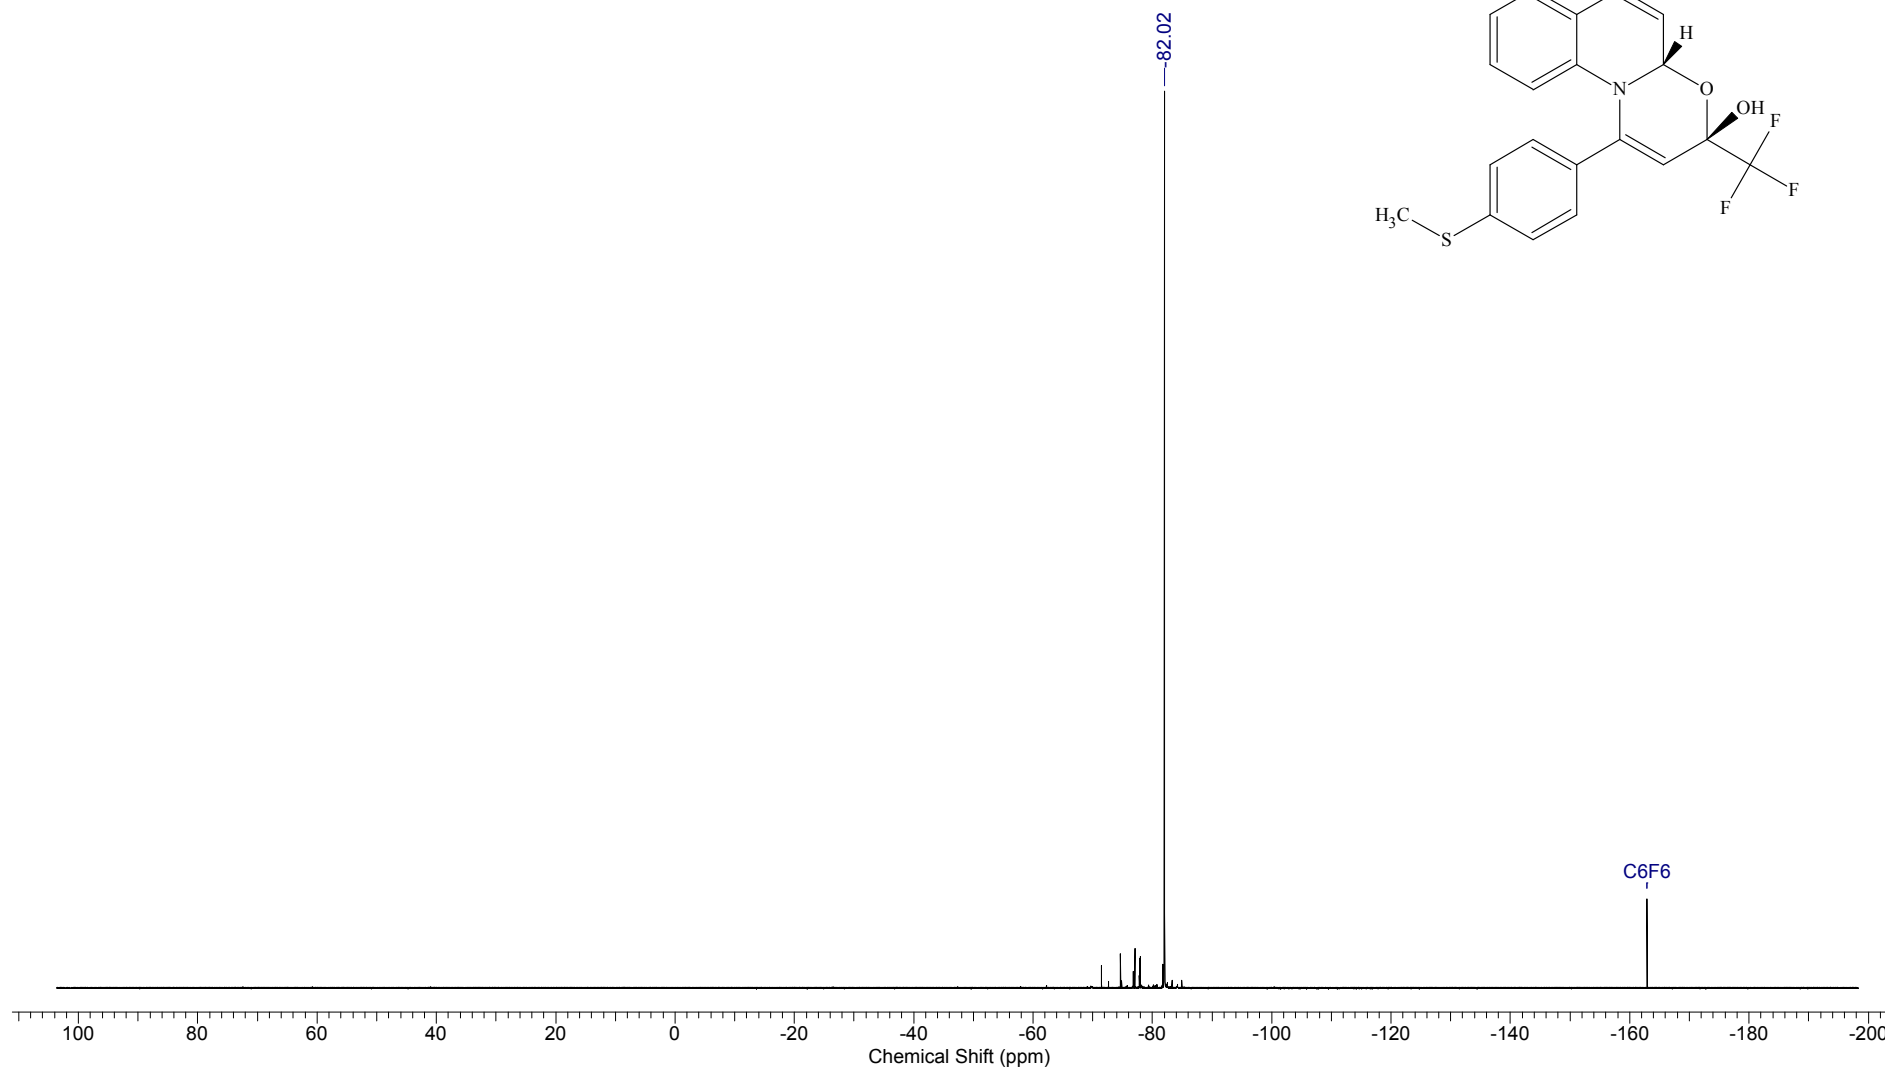

<sup>19</sup>F NMR spectrum of **3f** (376.5 MHz, CD<sub>3</sub>CN)

|    |          |         |                                                                  |
|----|----------|---------|------------------------------------------------------------------|
| FW | 379.7600 | Formula | C <sub>19</sub> H <sub>13</sub> ClF <sub>3</sub> NO <sub>2</sub> |
|----|----------|---------|------------------------------------------------------------------|

|                        |                                                            |                      |                      |                       |                      |
|------------------------|------------------------------------------------------------|----------------------|----------------------|-----------------------|----------------------|
| Acquisition Time (sec) | 2.5559                                                     | Comment              | Imported from UXMNR. | Date                  | 16 Oct 2018 16:12:24 |
| File Name              | C:\DOCS\OUTPUT_301\2018\10.16\10.16.18\BM-1399-2.H_001001r |                      |                      | Frequency (MHz)       | 400.13               |
| Nucleus                | 1H                                                         | Number of Transients | 4                    | Original Points Count | 16384                |
| Pulse Sequence         | zg30                                                       | Solvent              | ACETONITRILE-D3      | Points Count          | 65536                |
| Temperature (degree C) | 27.000                                                     |                      |                      | Sweep Width (Hz)      | 6410.26              |

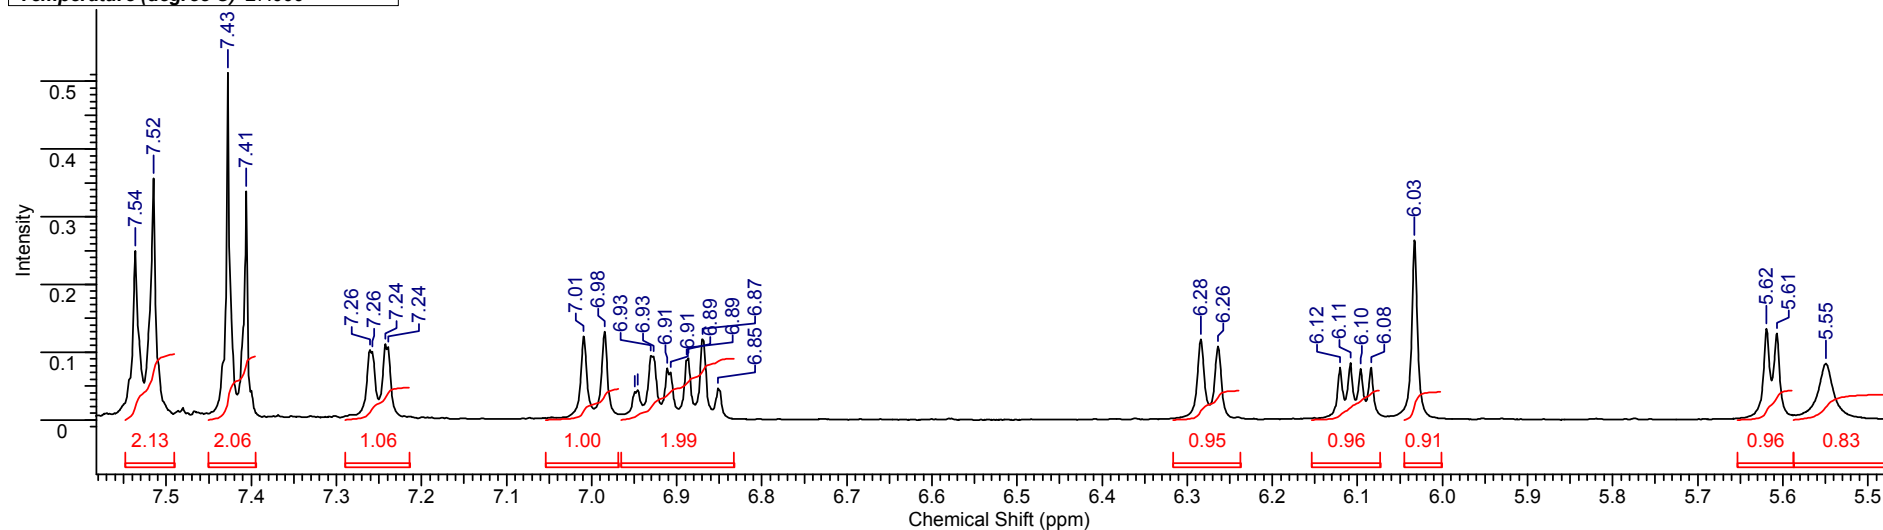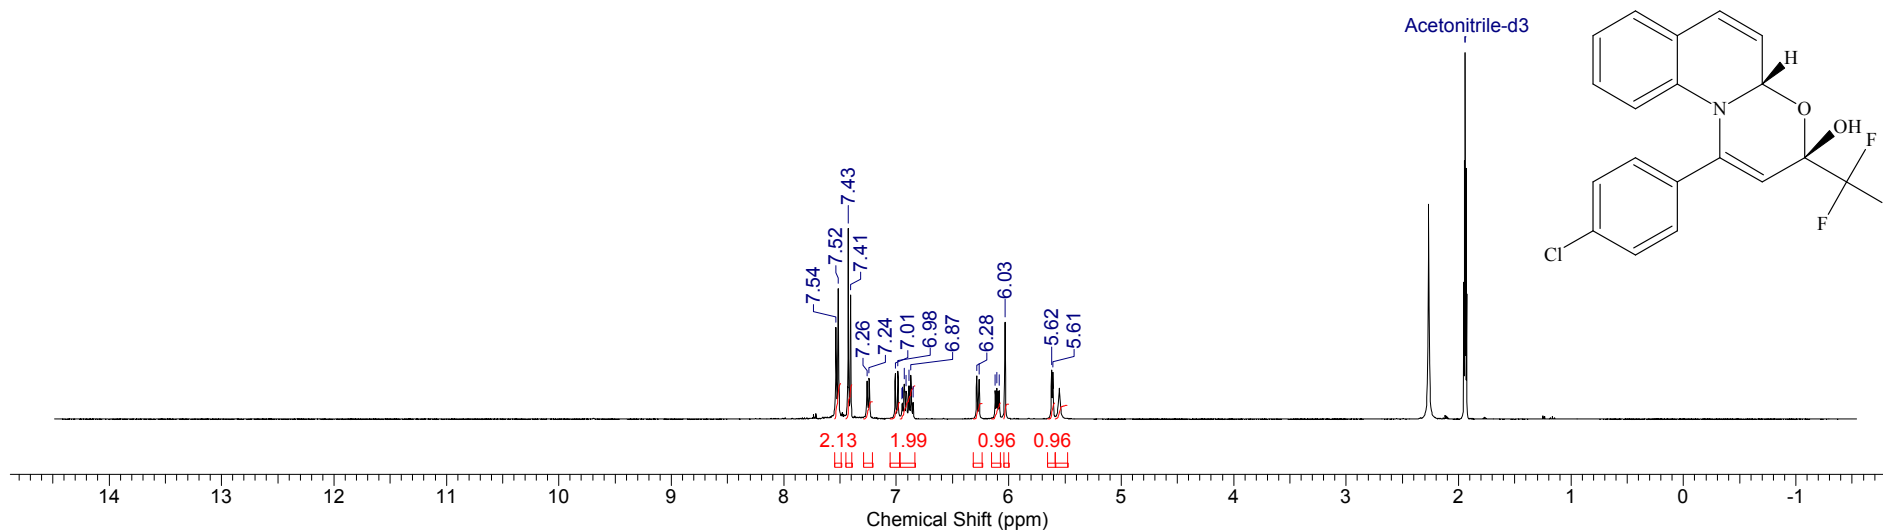

<sup>1</sup>H NMR spectrum of **3g** (400.1 MHz, CD<sub>3</sub>CN)

FW 379.7600 Formula C<sub>19</sub>H<sub>13</sub>ClF<sub>3</sub>NO<sub>2</sub>

|                        |                                                                  |                      |                              |                       |          |                        |        |
|------------------------|------------------------------------------------------------------|----------------------|------------------------------|-----------------------|----------|------------------------|--------|
| Acquisition Time (sec) | 1.9000                                                           | Comment              | STANDARD FLUORINE PARAMETERS |                       | Date     | Oct 1 2018             |        |
| File Name              | C:\DOCS\OUTPUT\301\F19\2018.10.01\BM1375_20181001_01\FLUORINE_01 |                      |                              | Frequency (MHz)       | 376.31   |                        |        |
| Nucleus                | 19F                                                              | Number of Transients | 16                           | Original Points Count | 169643   | Points Count           | 262144 |
| Pulse Sequence         | s2pul                                                            | Solvent              | DMSO-D6                      | Sweep Width (Hz)      | 89285.71 | Temperature (degree C) | 22.000 |

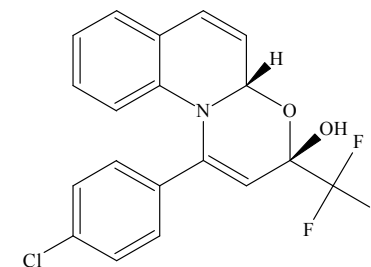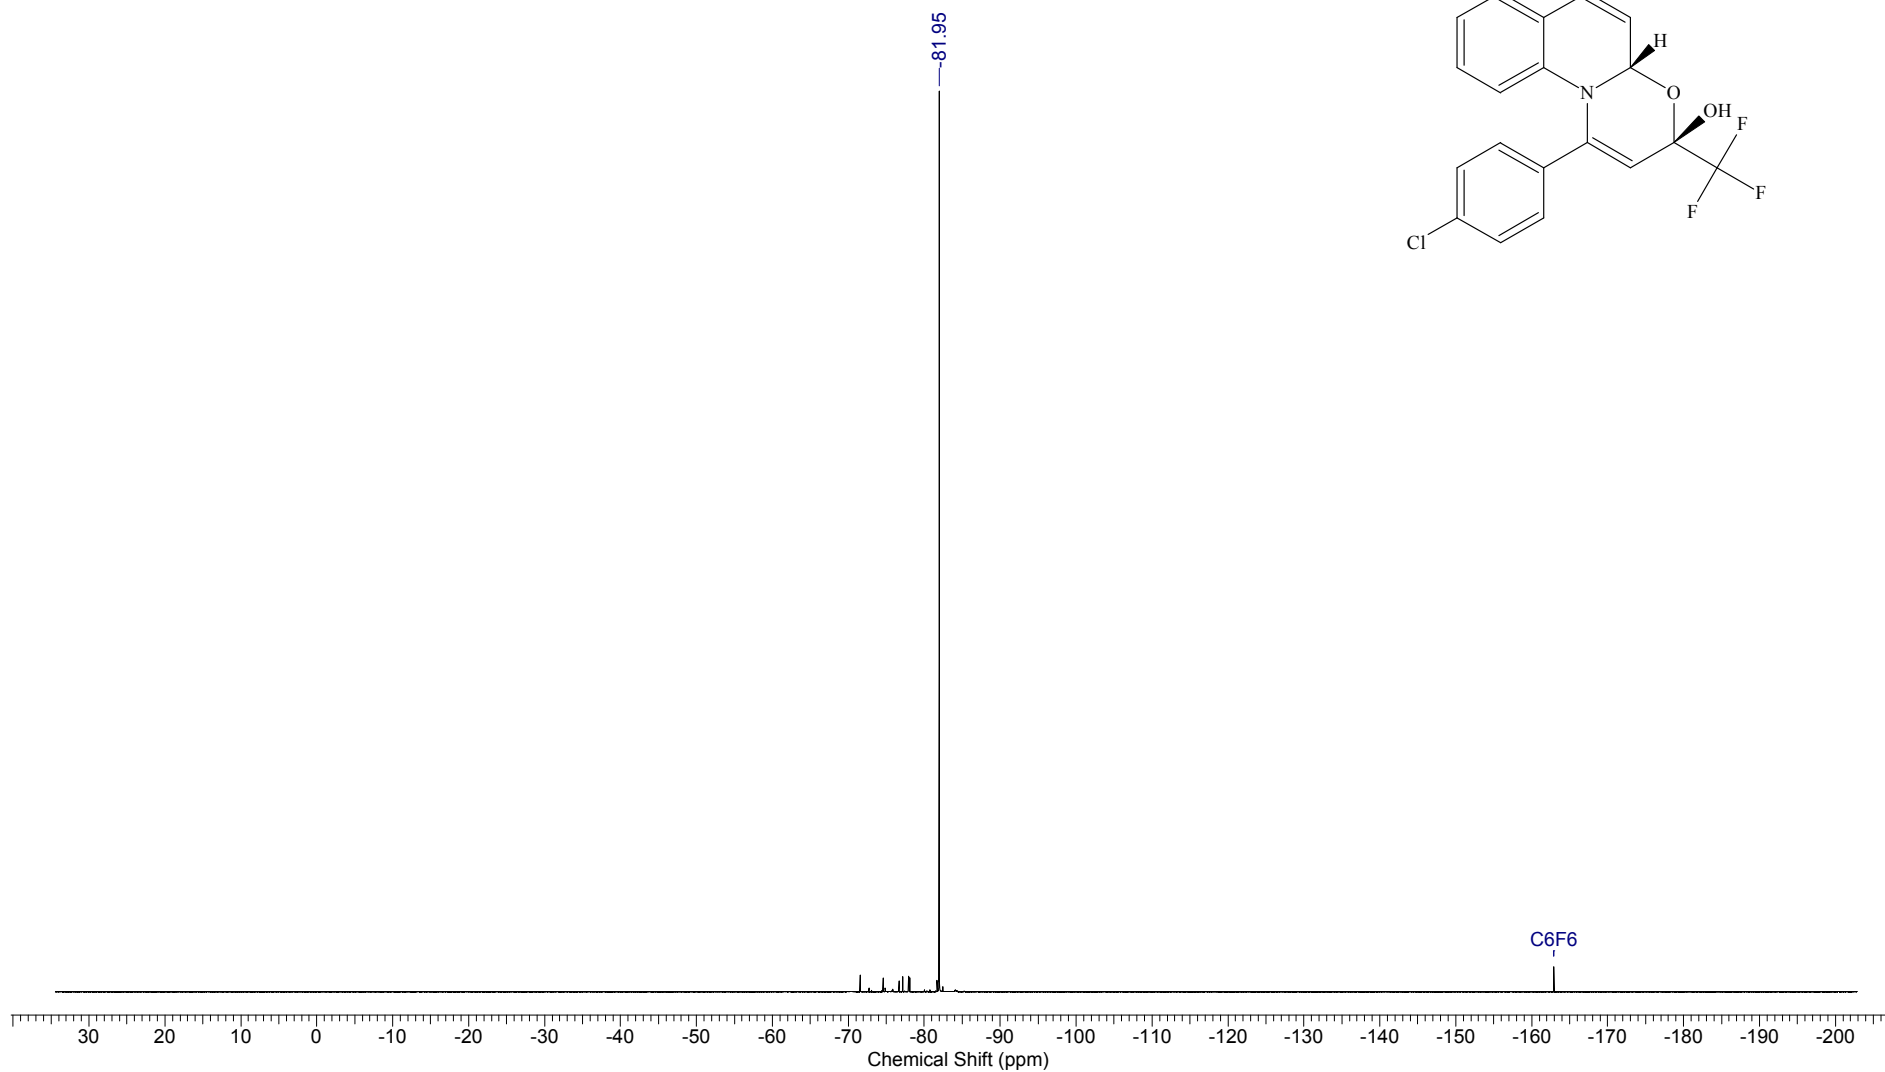

<sup>19</sup>F NMR spectrum of **3g** (376.5 MHz, CD<sub>3</sub>CN)

|           |          |                |                                                                  |
|-----------|----------|----------------|------------------------------------------------------------------|
| <b>FW</b> | 424.2113 | <b>Formula</b> | C <sub>19</sub> H <sub>13</sub> BrF <sub>3</sub> NO <sub>2</sub> |
|-----------|----------|----------------|------------------------------------------------------------------|

|                               |                                                                |                             |                      |                              |                      |
|-------------------------------|----------------------------------------------------------------|-----------------------------|----------------------|------------------------------|----------------------|
| <b>Acquisition Time (sec)</b> | 4.0894                                                         | <b>Comment</b>              | Imported from UXMNR. | <b>Date</b>                  | 16 Oct 2018 20:47:00 |
| <b>File Name</b>              | C:\DOCS\OUTPUT_301\2018\10.10\001001r\181016\BM-1398-2_001001r |                             |                      | <b>Frequency (MHz)</b>       | 400.13               |
| <b>Nucleus</b>                | 1H                                                             | <b>Number of Transients</b> | 8                    | <b>Original Points Count</b> | 32768                |
| <b>Pulse Sequence</b>         | zg30                                                           | <b>Solvent</b>              | ACETONITRILE-D3      | <b>Points Count</b>          | 131072               |
| <b>Temperature (degree C)</b> | 27.000                                                         |                             |                      | <b>Sweep Width (Hz)</b>      | 8012.82              |

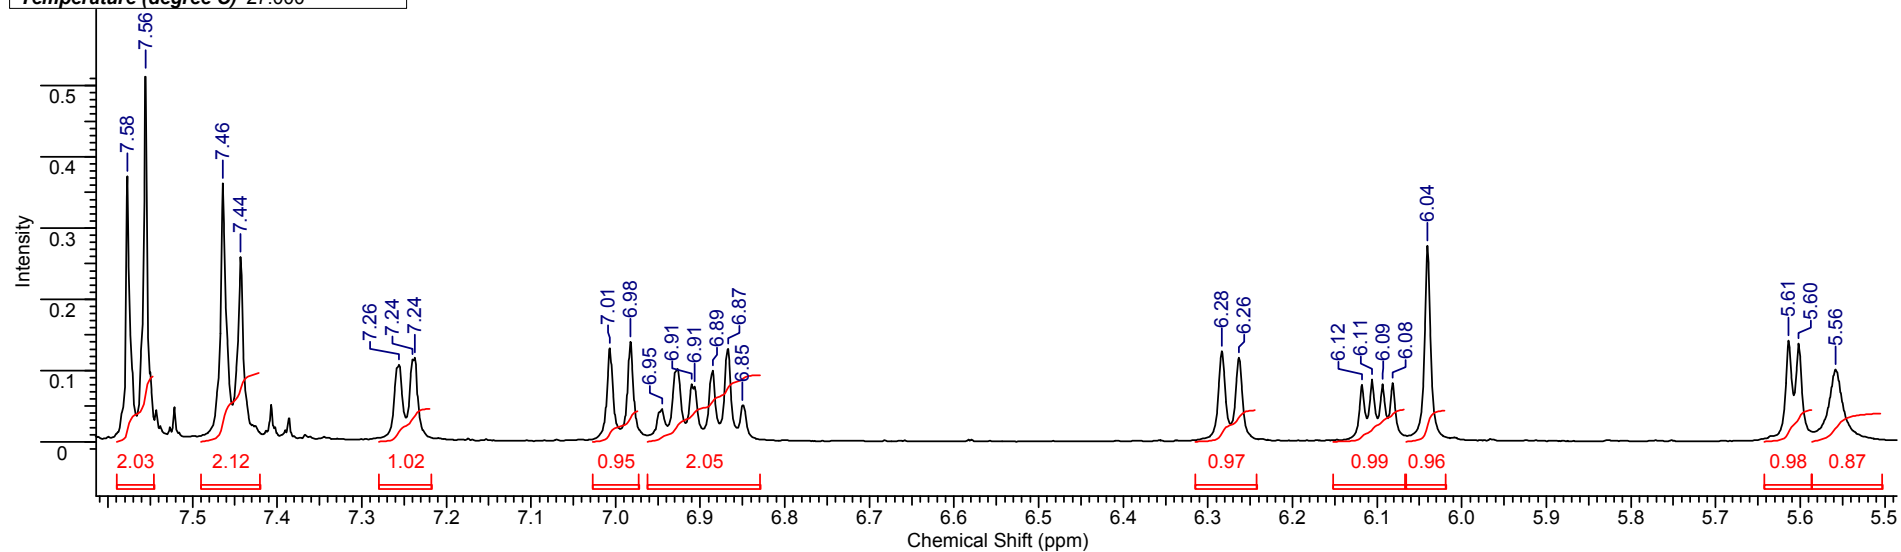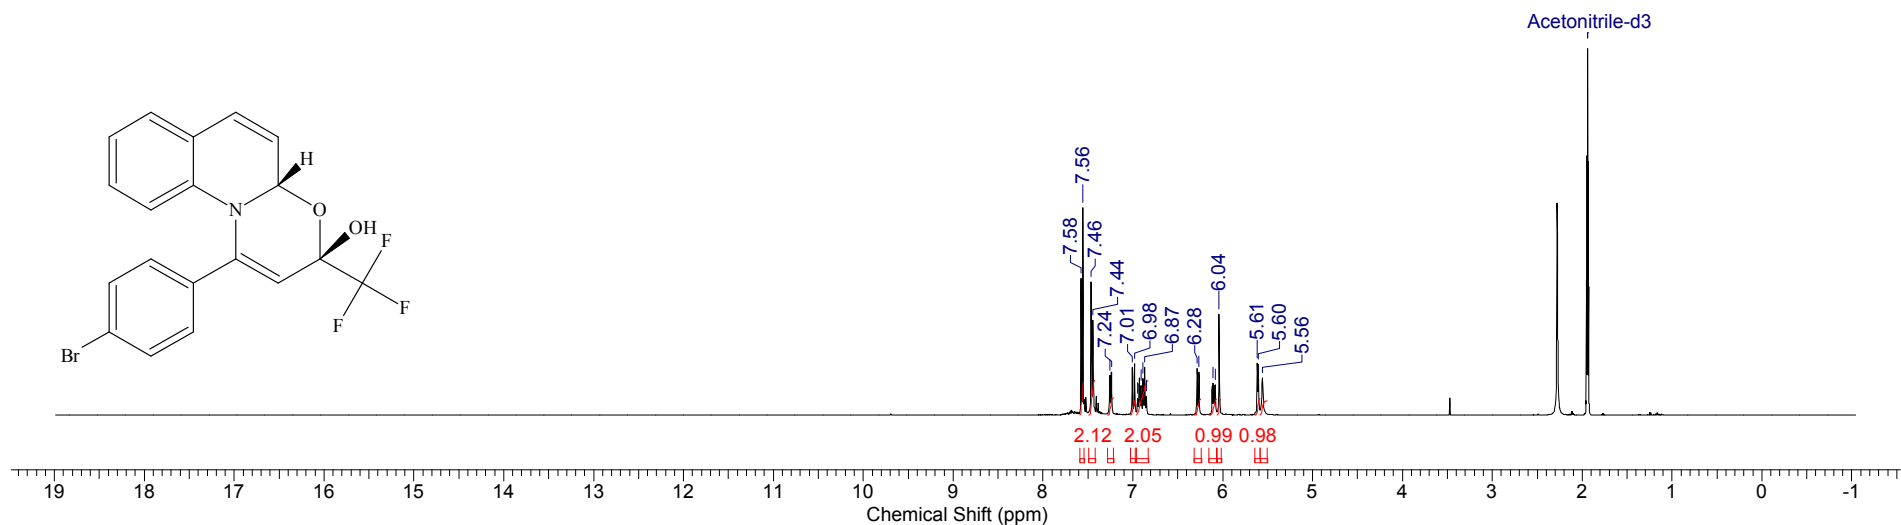

<sup>1</sup>H NMR spectrum of **3h** (400.1 MHz, CD<sub>3</sub>CN)

|                    |                                                                                 |
|--------------------|---------------------------------------------------------------------------------|
| <b>FW</b> 424.2113 | <b>Formula</b> C <sub>19</sub> H <sub>13</sub> BrF <sub>3</sub> NO <sub>2</sub> |
|--------------------|---------------------------------------------------------------------------------|

|                                      |                             |                                                                                   |                                     |
|--------------------------------------|-----------------------------|-----------------------------------------------------------------------------------|-------------------------------------|
| <b>Acquisition Time (sec)</b> 1.9000 | <b>Date</b> Oct 1 2018      | <b>File Name</b> C:\DOCS\OUTPUT_301\F19\2018.10.01\BM1376_20181001_01\FLUORINE_01 |                                     |
| <b>Frequency (MHz)</b> 376.31        | <b>Nucleus</b> 19F          | <b>Number of Transients</b> 16                                                    | <b>Original Points Count</b> 169643 |
| <b>Points Count</b> 262144           | <b>Pulse Sequence</b> s2pul | <b>Solvent</b> DMSO-D6                                                            | <b>Sweep Width (Hz)</b> 89285.71    |
| <b>Temperature (degree C)</b> 22.000 |                             |                                                                                   |                                     |

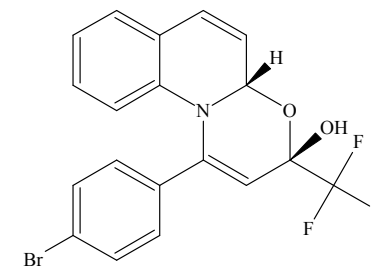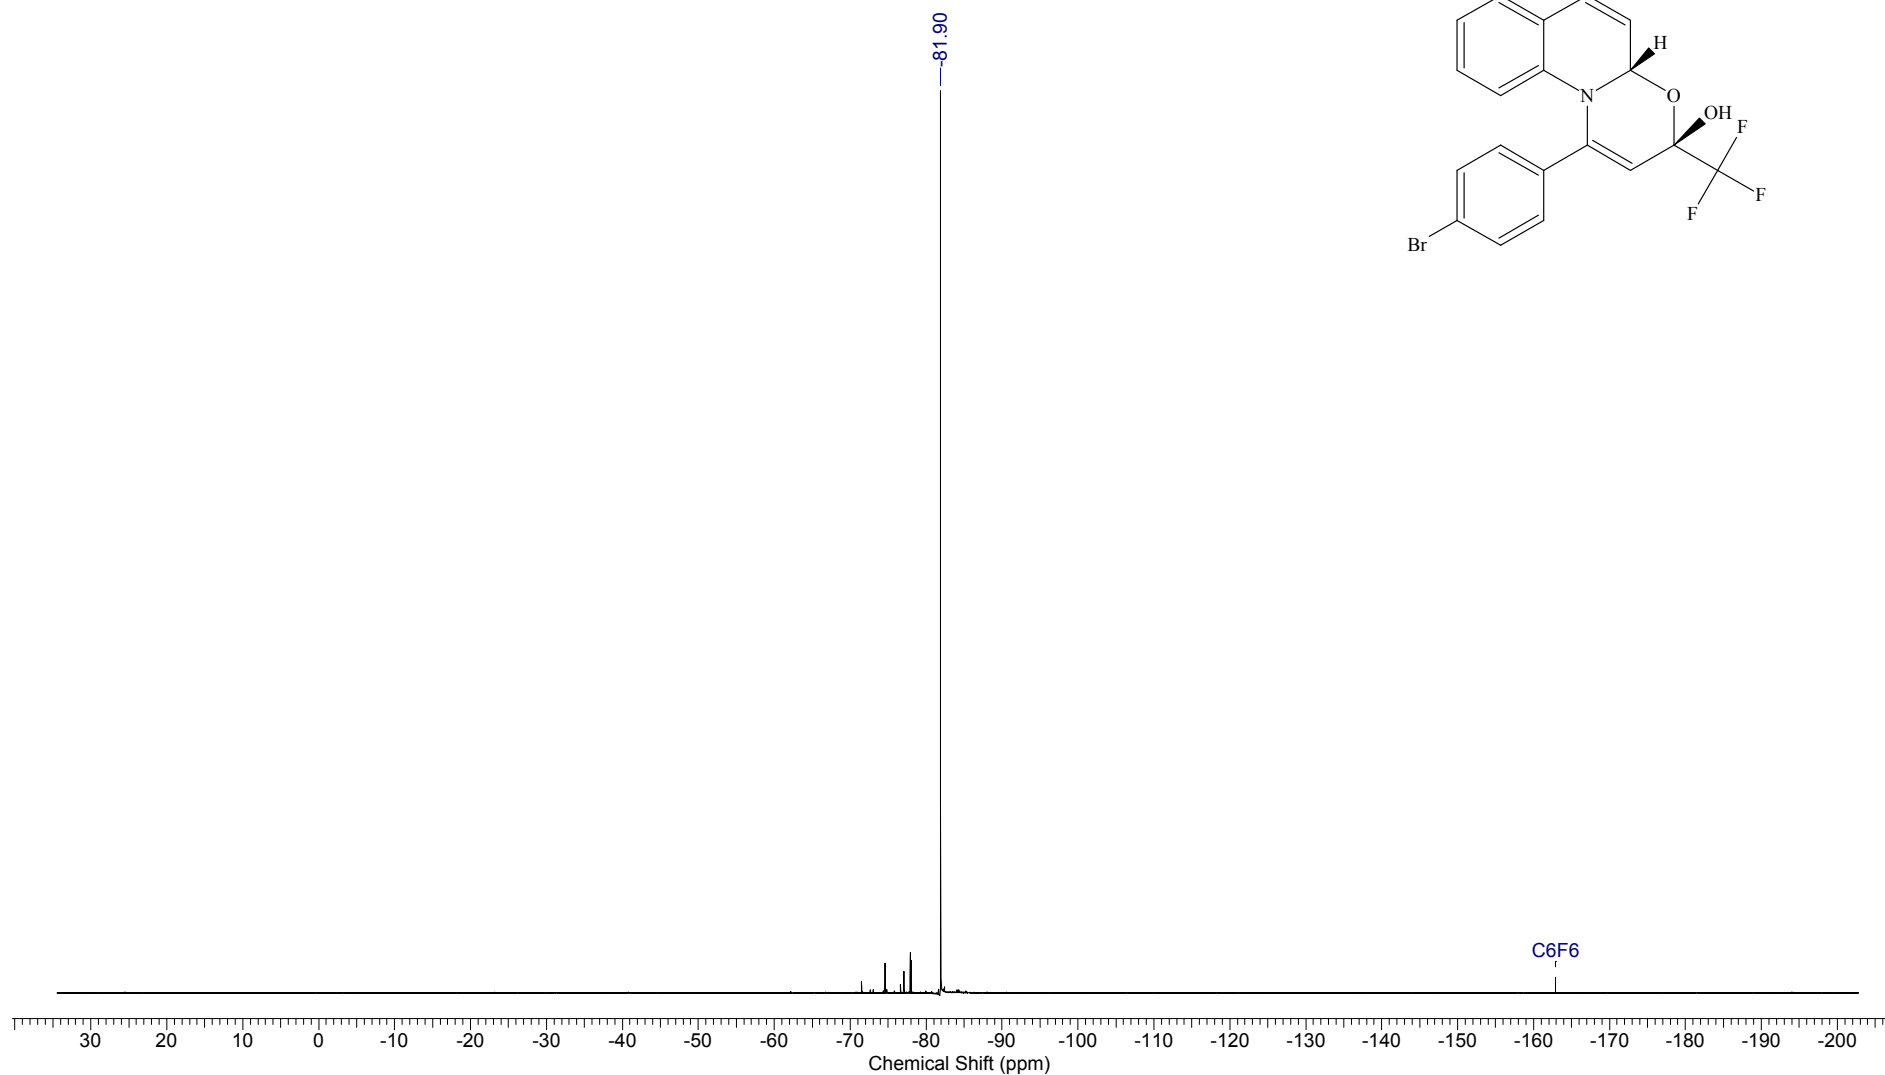

<sup>19</sup>F NMR spectrum of **3h** (376.5 MHz, CD<sub>3</sub>CN)

|                               |                                                    |                             |                      |                              |                      |
|-------------------------------|----------------------------------------------------|-----------------------------|----------------------|------------------------------|----------------------|
| <b>Acquisition Time (sec)</b> | 4.0894                                             | <b>Comment</b>              | Imported from UXNMR. | <b>Date</b>                  | 18 Mar 2019 15:56:38 |
| <b>File Name</b>              | C:\DOCS\OUTPUT_301\2019\03.1 a\BM-1520-2.H_001001r | <b>Number of Transients</b> | 4                    | <b>Original Points Count</b> | 32768                |
| <b>Nucleus</b>                | 1H                                                 | <b>Solvent</b>              | ACETONITRILE-D3      | <b>Points Count</b>          | 131072               |
| <b>Pulse Sequence</b>         | zg30                                               | <b>Sweep Width (Hz)</b>     | 8012.82              |                              |                      |
| <b>Temperature (degree C)</b> | 27.000                                             |                             |                      |                              |                      |

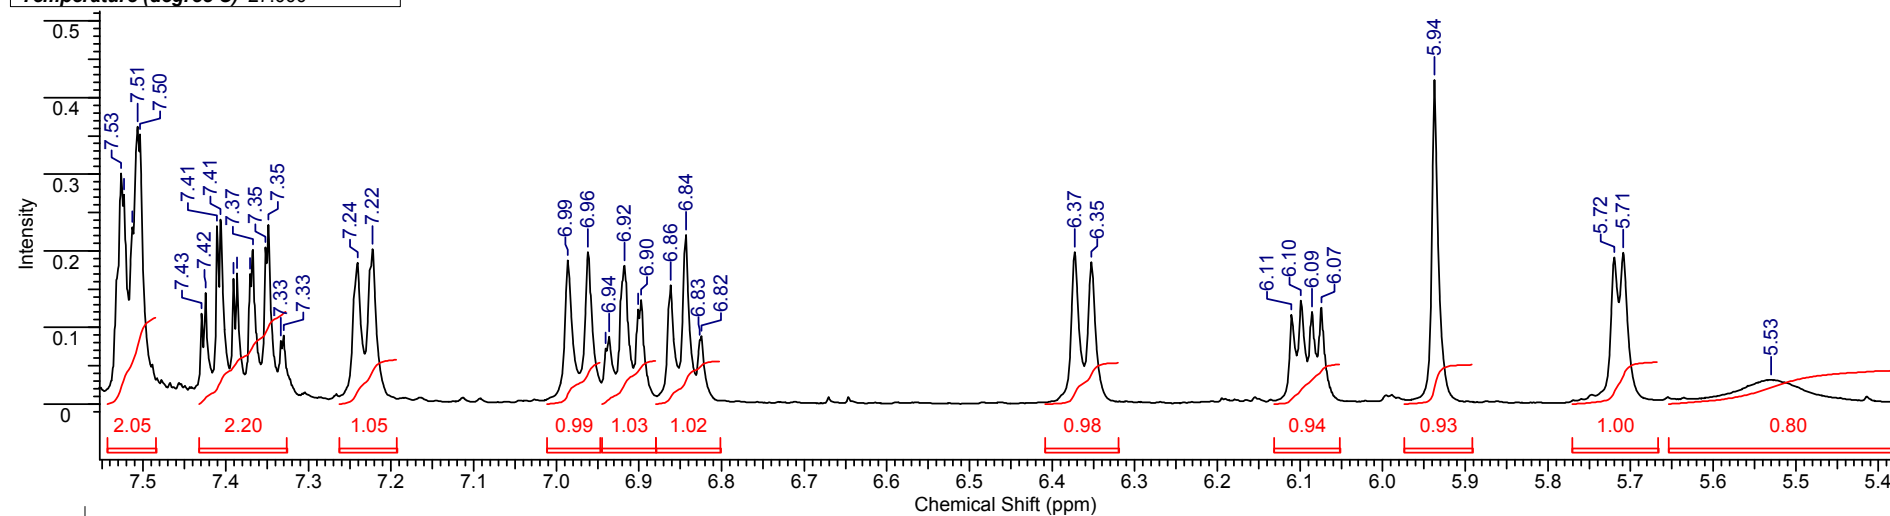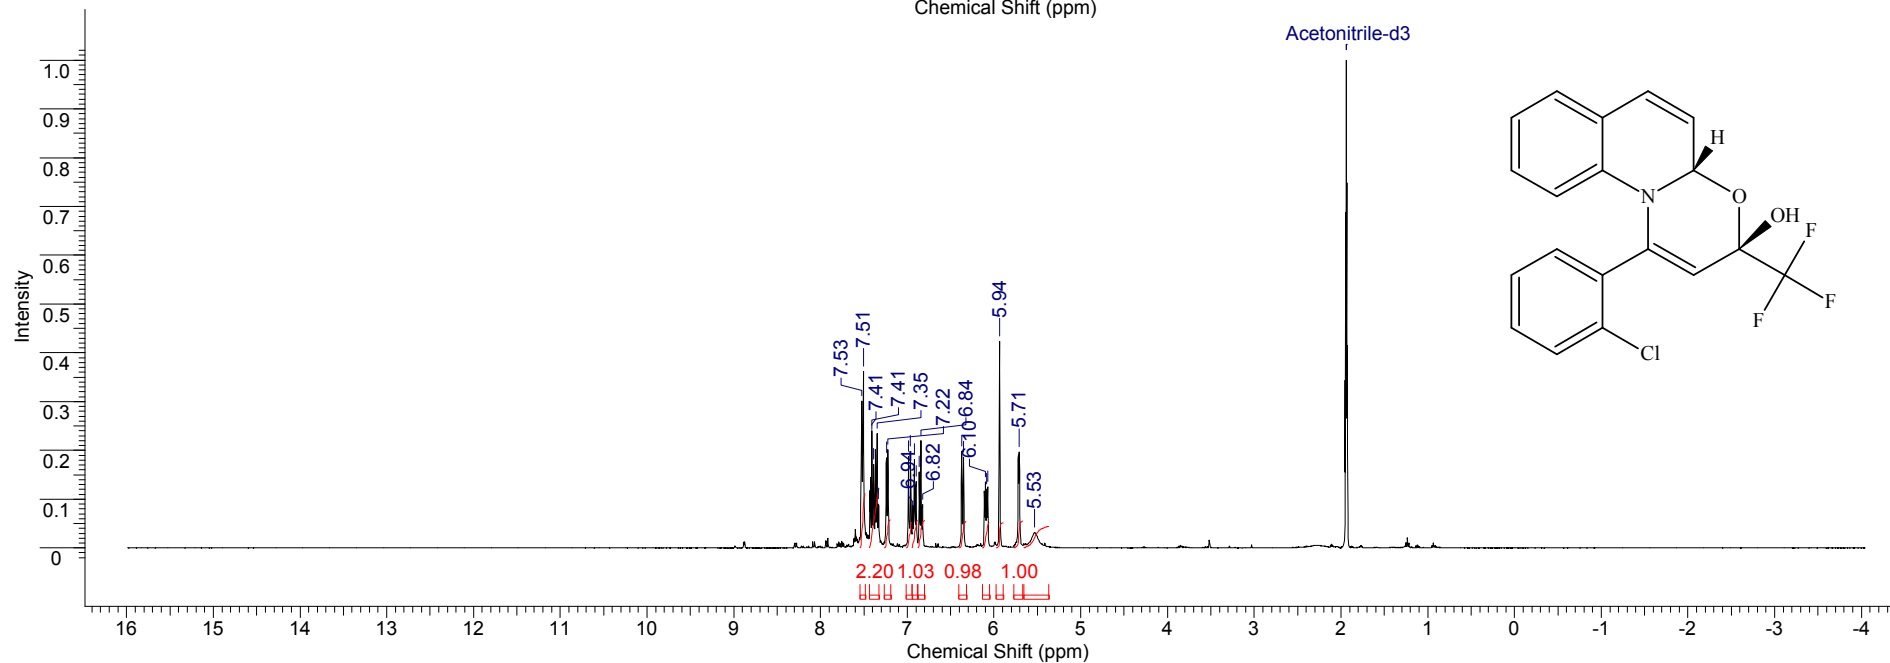

<sup>1</sup>H NMR spectrum of **3i** (400.1 MHz, CD<sub>3</sub>CN)

|                        |                                                    |                       |                      |                        |                      |
|------------------------|----------------------------------------------------|-----------------------|----------------------|------------------------|----------------------|
| Acquisition Time (sec) | 0.6783                                             | Comment               | Imported from UXMNR. | Date                   | 16 Mar 2019 14:04:18 |
| File Name              | C:\DOCS\OUTPUT_301\2019\03.i\add\BM-1520.C_002001r | Frequency (MHz)       | 100.61               | Nucleus                | <sup>13</sup> C      |
| Number of Transients   | 106                                                | Original Points Count | 16384                | Points Count           | 131072               |
| Solvent                | CHLOROFORM-D                                       | Sweep Width (Hz)      | 24154.59             | Pulse Sequence         | zgpg30               |
|                        |                                                    |                       |                      | Temperature (degree C) | 27.000               |

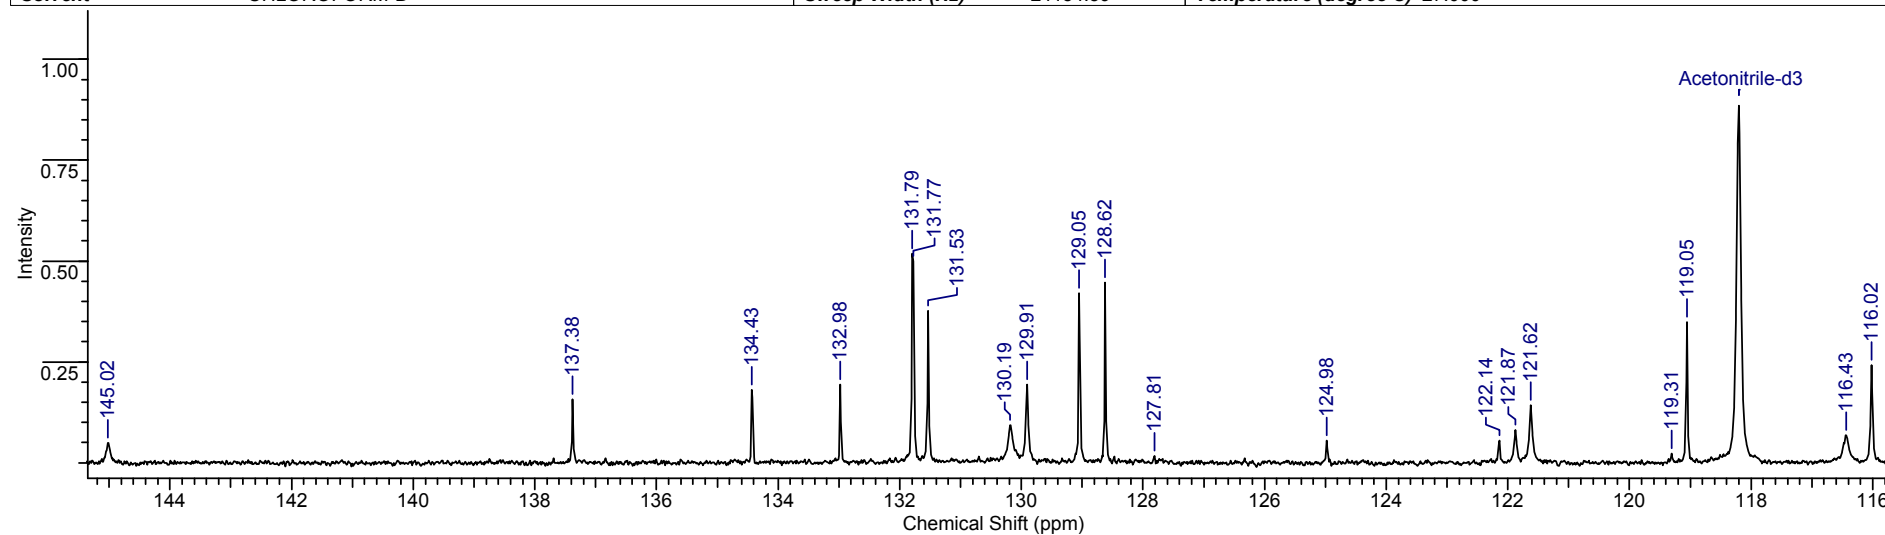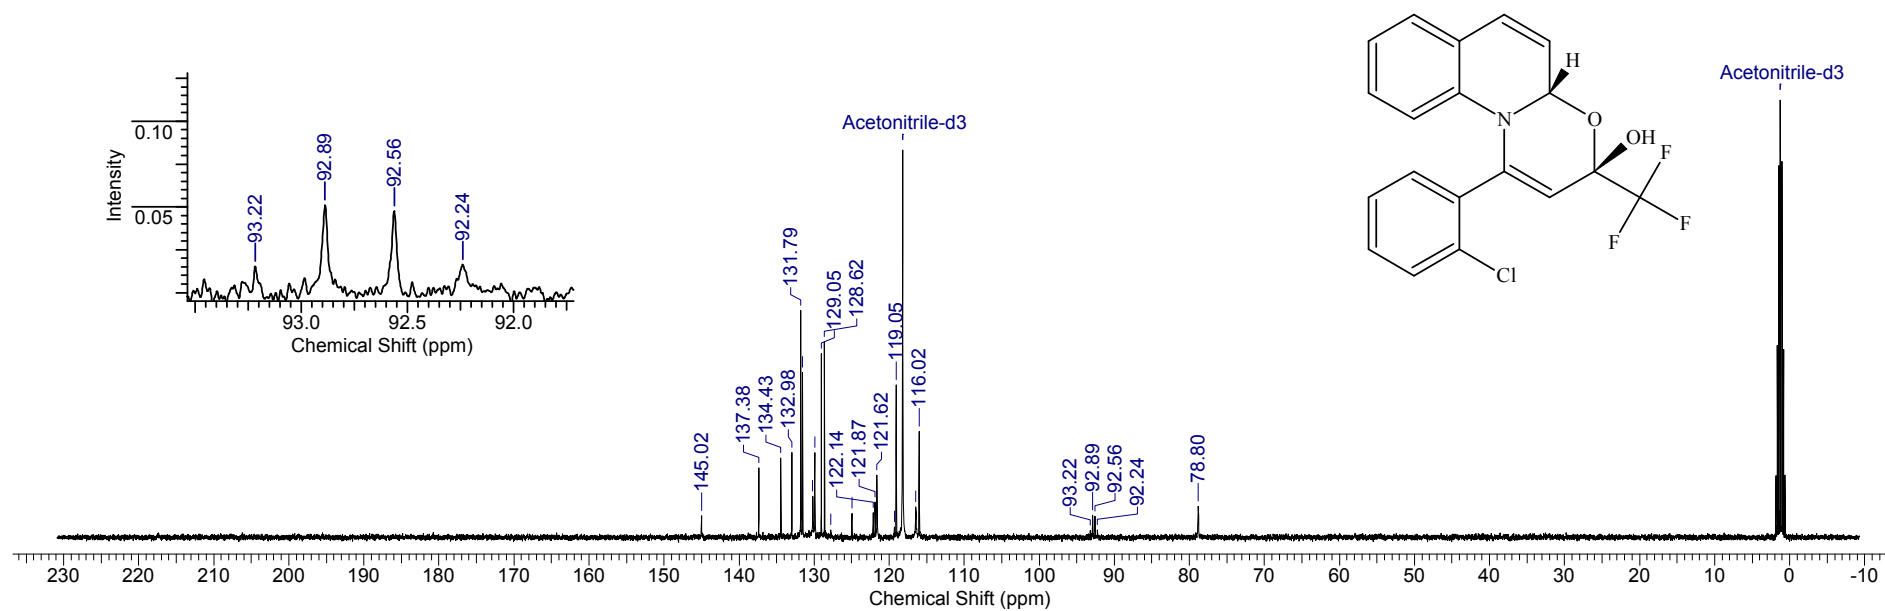

|                               |           |                               |             |                             |                                                                       |                              |        |
|-------------------------------|-----------|-------------------------------|-------------|-----------------------------|-----------------------------------------------------------------------|------------------------------|--------|
| <b>Acquisition Time (sec)</b> | 2.3069    | <b>Date</b>                   | Mar 14 2019 | <b>File Name</b>            | C:\DOCS\OUTPUT_301\F19\2019.03.14\BM-1511-A-F_20190314_01\FLUORINE_01 |                              |        |
| <b>Frequency (MHz)</b>        | 376.32    | <b>Nucleus</b>                | 19F         | <b>Number of Transients</b> | 8                                                                     | <b>Original Points Count</b> | 262144 |
| <b>Points Count</b>           | 262144    | <b>Pulse Sequence</b>         | s2pul       | <b>Solvent</b>              | ACETONITRILE-D3                                                       |                              |        |
| <b>Sweep Width (Hz)</b>       | 113636.37 | <b>Temperature (degree C)</b> | 22.000      |                             |                                                                       |                              |        |

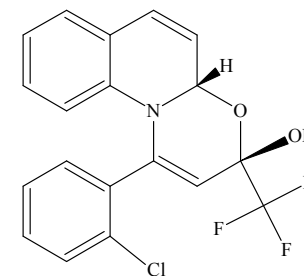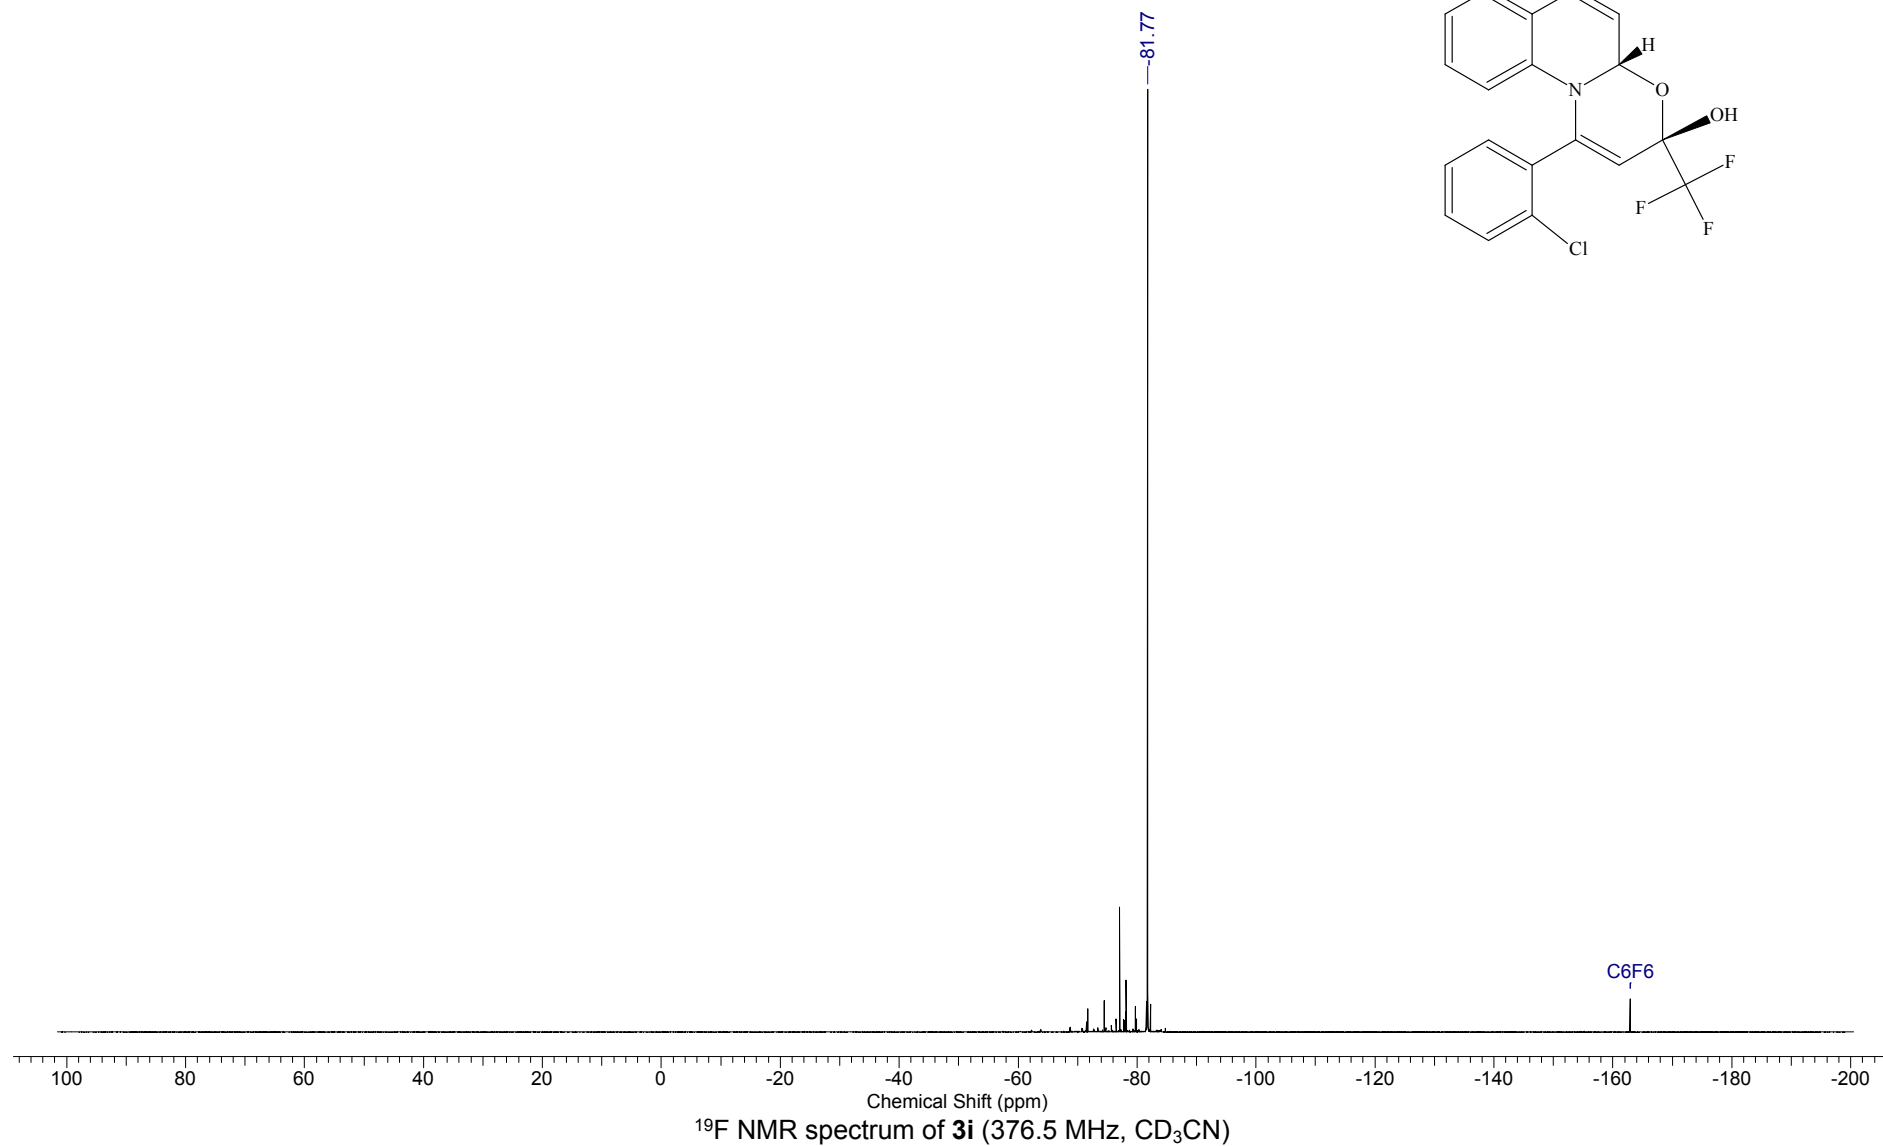



|                               |                                                      |                              |                      |                         |                      |
|-------------------------------|------------------------------------------------------|------------------------------|----------------------|-------------------------|----------------------|
| <b>Acquisition Time (sec)</b> | 4.0894                                               | <b>Comment</b>               | Imported from UXMNR. | <b>Date</b>             | 18 Mar 2019 16:02:18 |
| <b>File Name</b>              | C:\DOCS\OUTPUT_301\2019\03.i\add\BM-1521-2.H_001001r | <b>Number of Transients</b>  | 4                    | <b>Frequency (MHz)</b>  | 400.13               |
| <b>Nucleus</b>                | 1H                                                   | <b>Original Points Count</b> | 32768                | <b>Points Count</b>     | 131072               |
| <b>Pulse Sequence</b>         | zg30                                                 | <b>Solvent</b>               | ACETONITRILE-D3      | <b>Sweep Width (Hz)</b> | 8012.82              |
| <b>Temperature (degree C)</b> | 27.000                                               |                              |                      |                         |                      |

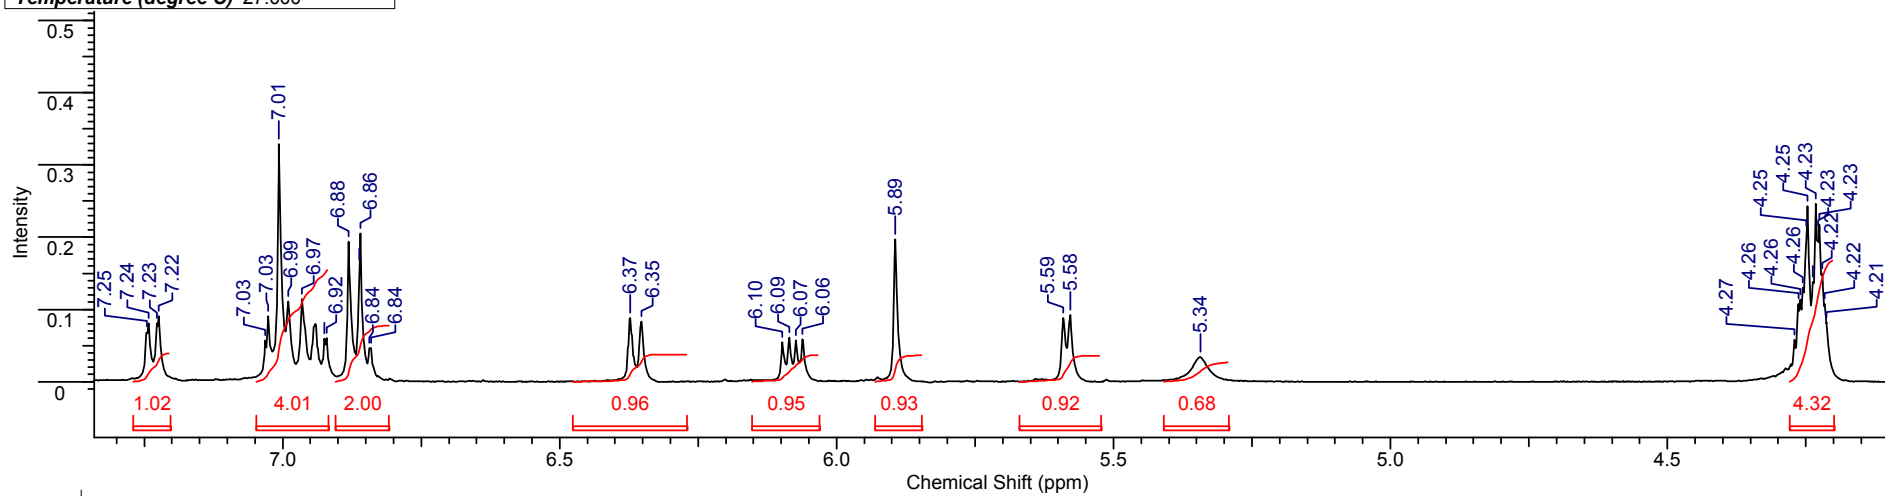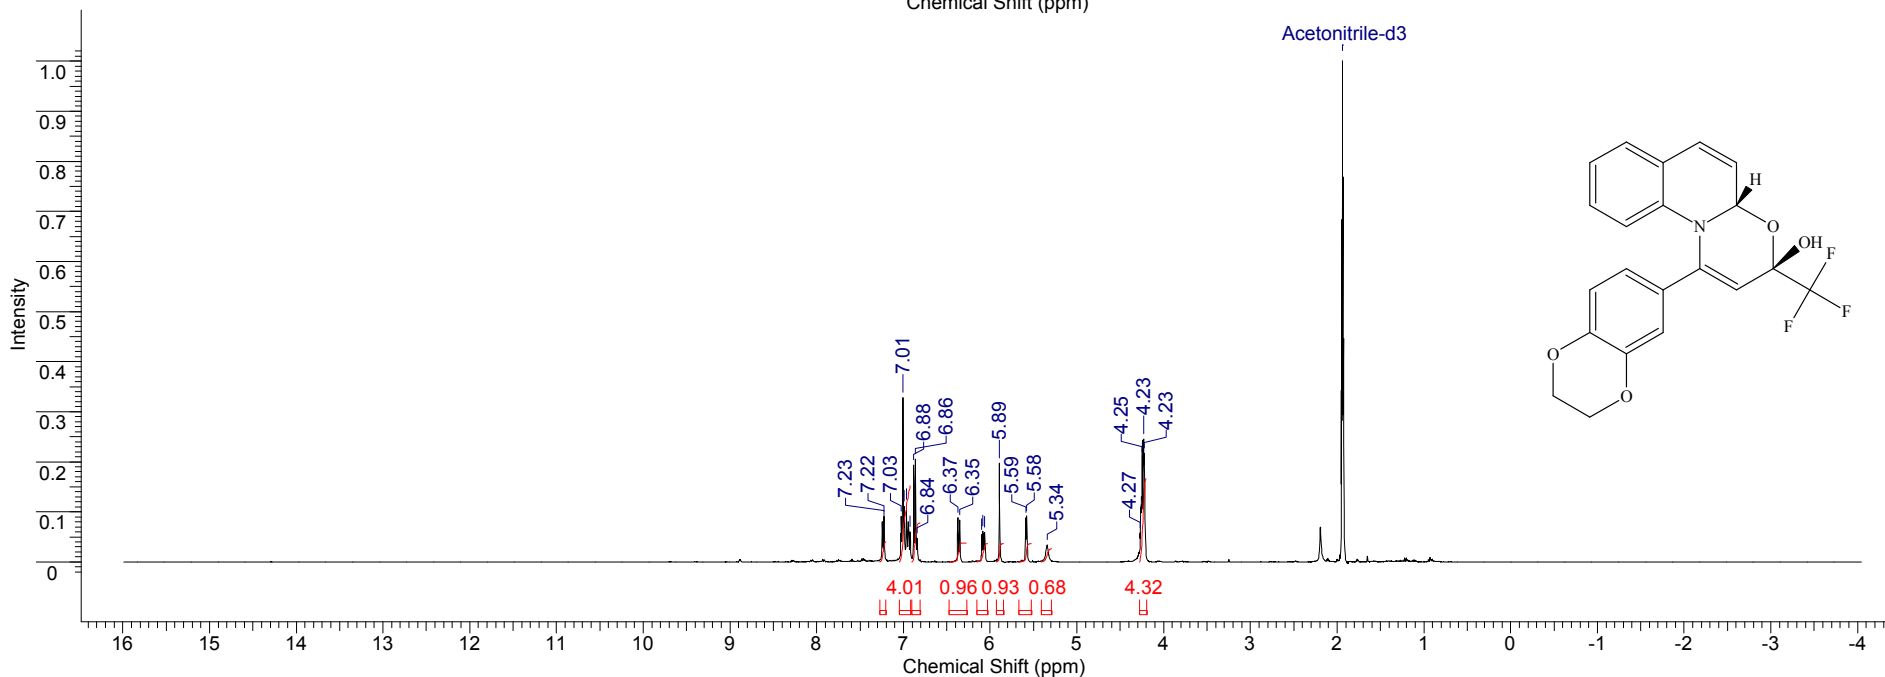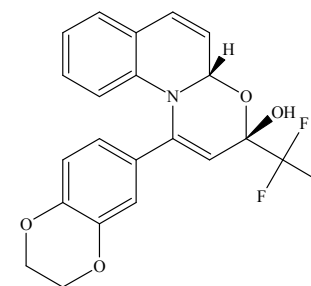

<sup>1</sup>H NMR spectrum of **3j** (400.1 MHz, CD<sub>3</sub>CN)

|                               |                                   |                               |                      |                       |             |                             |              |
|-------------------------------|-----------------------------------|-------------------------------|----------------------|-----------------------|-------------|-----------------------------|--------------|
| <b>Acquisition Time (sec)</b> | 0.6783                            | <b>Comment</b>                | Imported from UXNMR. |                       | <b>Date</b> | 16 Mar 2019 21:35:50        |              |
| <b>File Name</b>              | C:\DOCS\BMV190316\BM-1521_002001r | <b>Frequency (MHz)</b>        | 100.61               | <b>Nucleus</b>        | 13C         | <b>Number of Transients</b> | 128          |
| <b>Original Points Count</b>  | 16384                             | <b>Points Count</b>           | 131072               | <b>Pulse Sequence</b> | zgpg30      | <b>Solvent</b>              | CHLOROFORM-D |
| <b>Sweep Width (Hz)</b>       | 24154.59                          | <b>Temperature (degree C)</b> | 27.000               |                       |             |                             |              |

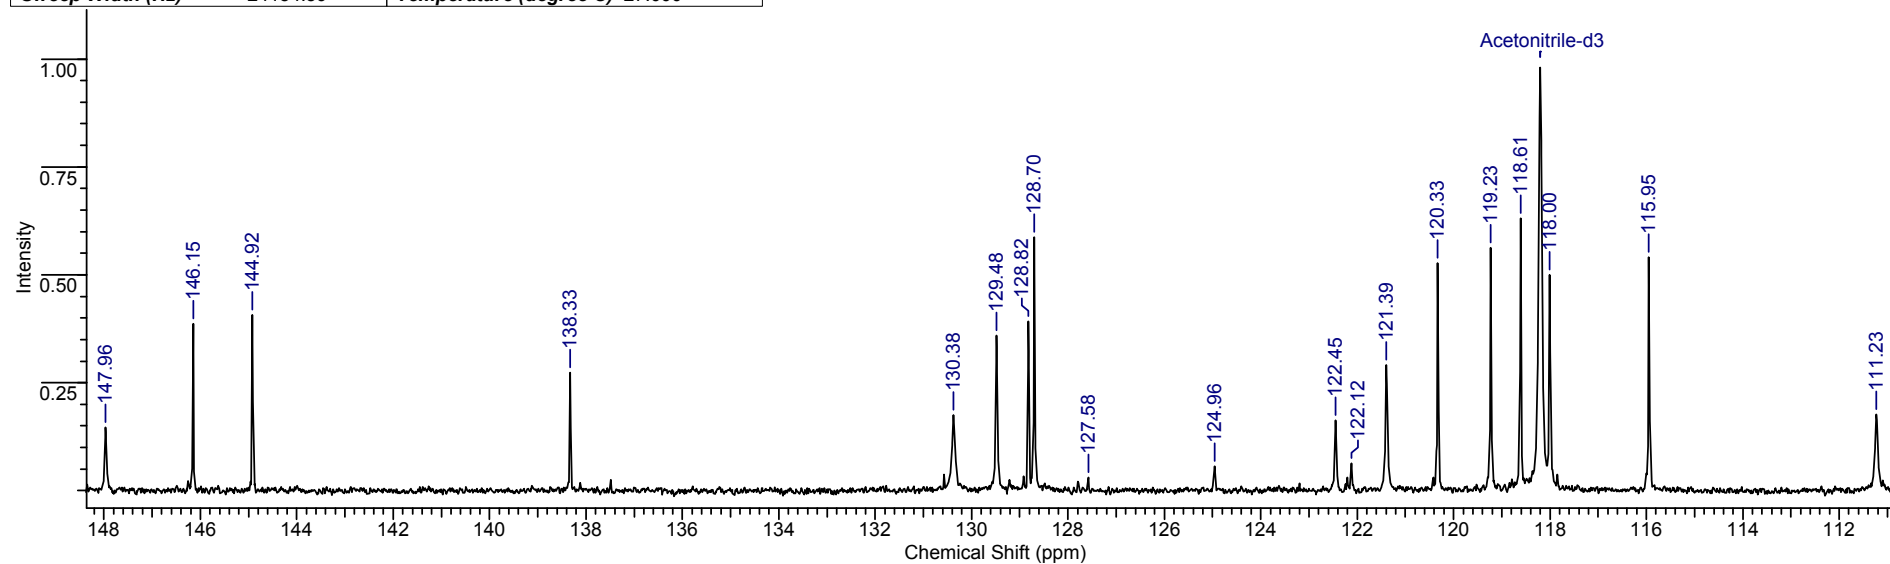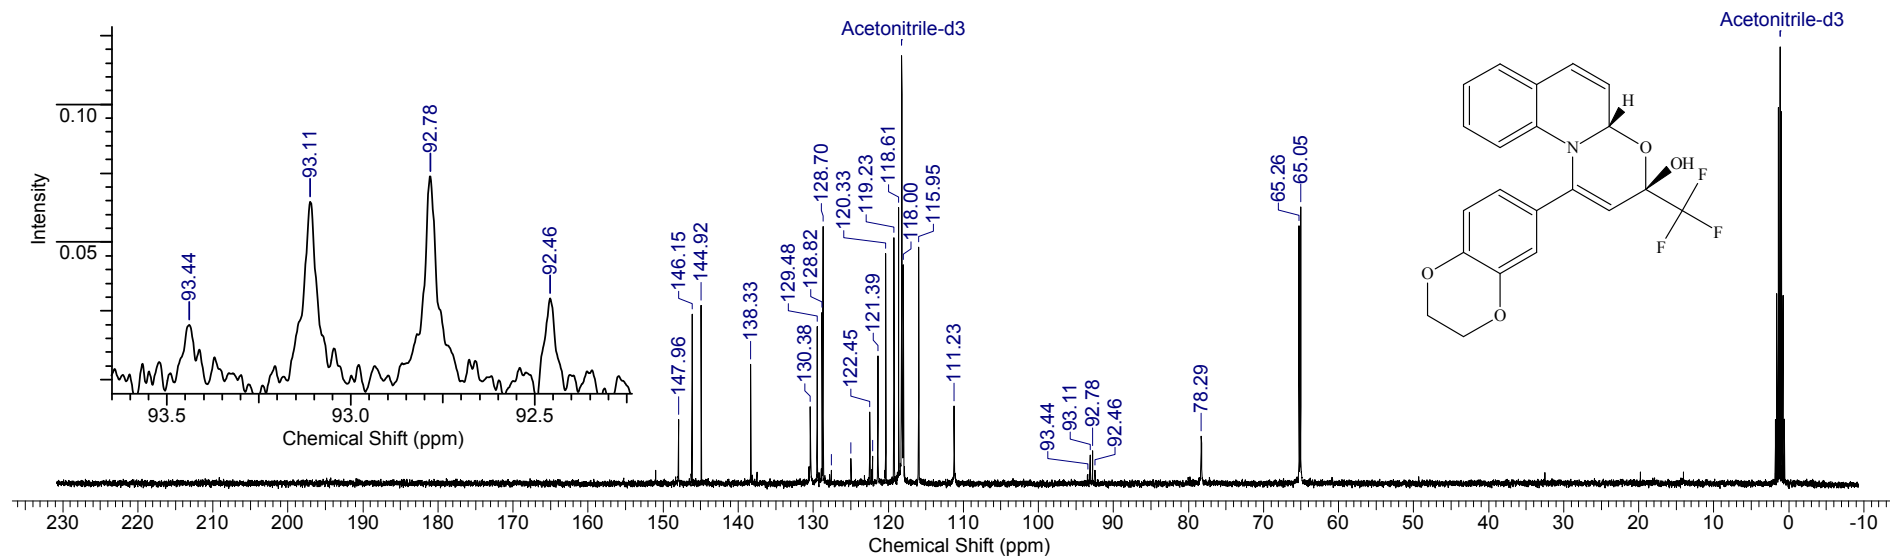<sup>13</sup>C NMR spectrum of **3j** (100.6 MHz, CD<sub>3</sub>CN)

|                               |          |                               |             |                             |                                                                      |                              |       |
|-------------------------------|----------|-------------------------------|-------------|-----------------------------|----------------------------------------------------------------------|------------------------------|-------|
| <b>Acquisition Time (sec)</b> | 0.7340   | <b>Date</b>                   | Mar 19 2019 | <b>File Name</b>            | C:\DOCS\OUTPUT_301\F19\2019.03.19\bm1521-2-f_20190319_01\FLUORINE_01 |                              |       |
| <b>Frequency (MHz)</b>        | 376.31   | <b>Nucleus</b>                | 19F         | <b>Number of Transients</b> | 1000                                                                 | <b>Original Points Count</b> | 65536 |
| <b>Points Count</b>           | 65536    | <b>Pulse Sequence</b>         | s2pul       | <b>Solvent</b>              | ACETONITRILE-D3                                                      |                              |       |
| <b>Sweep Width (Hz)</b>       | 89285.71 | <b>Temperature (degree C)</b> | 22.000      |                             |                                                                      |                              |       |

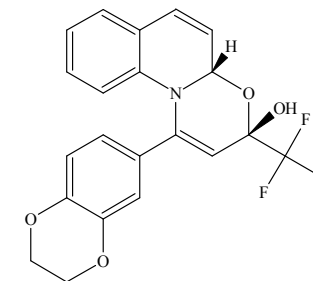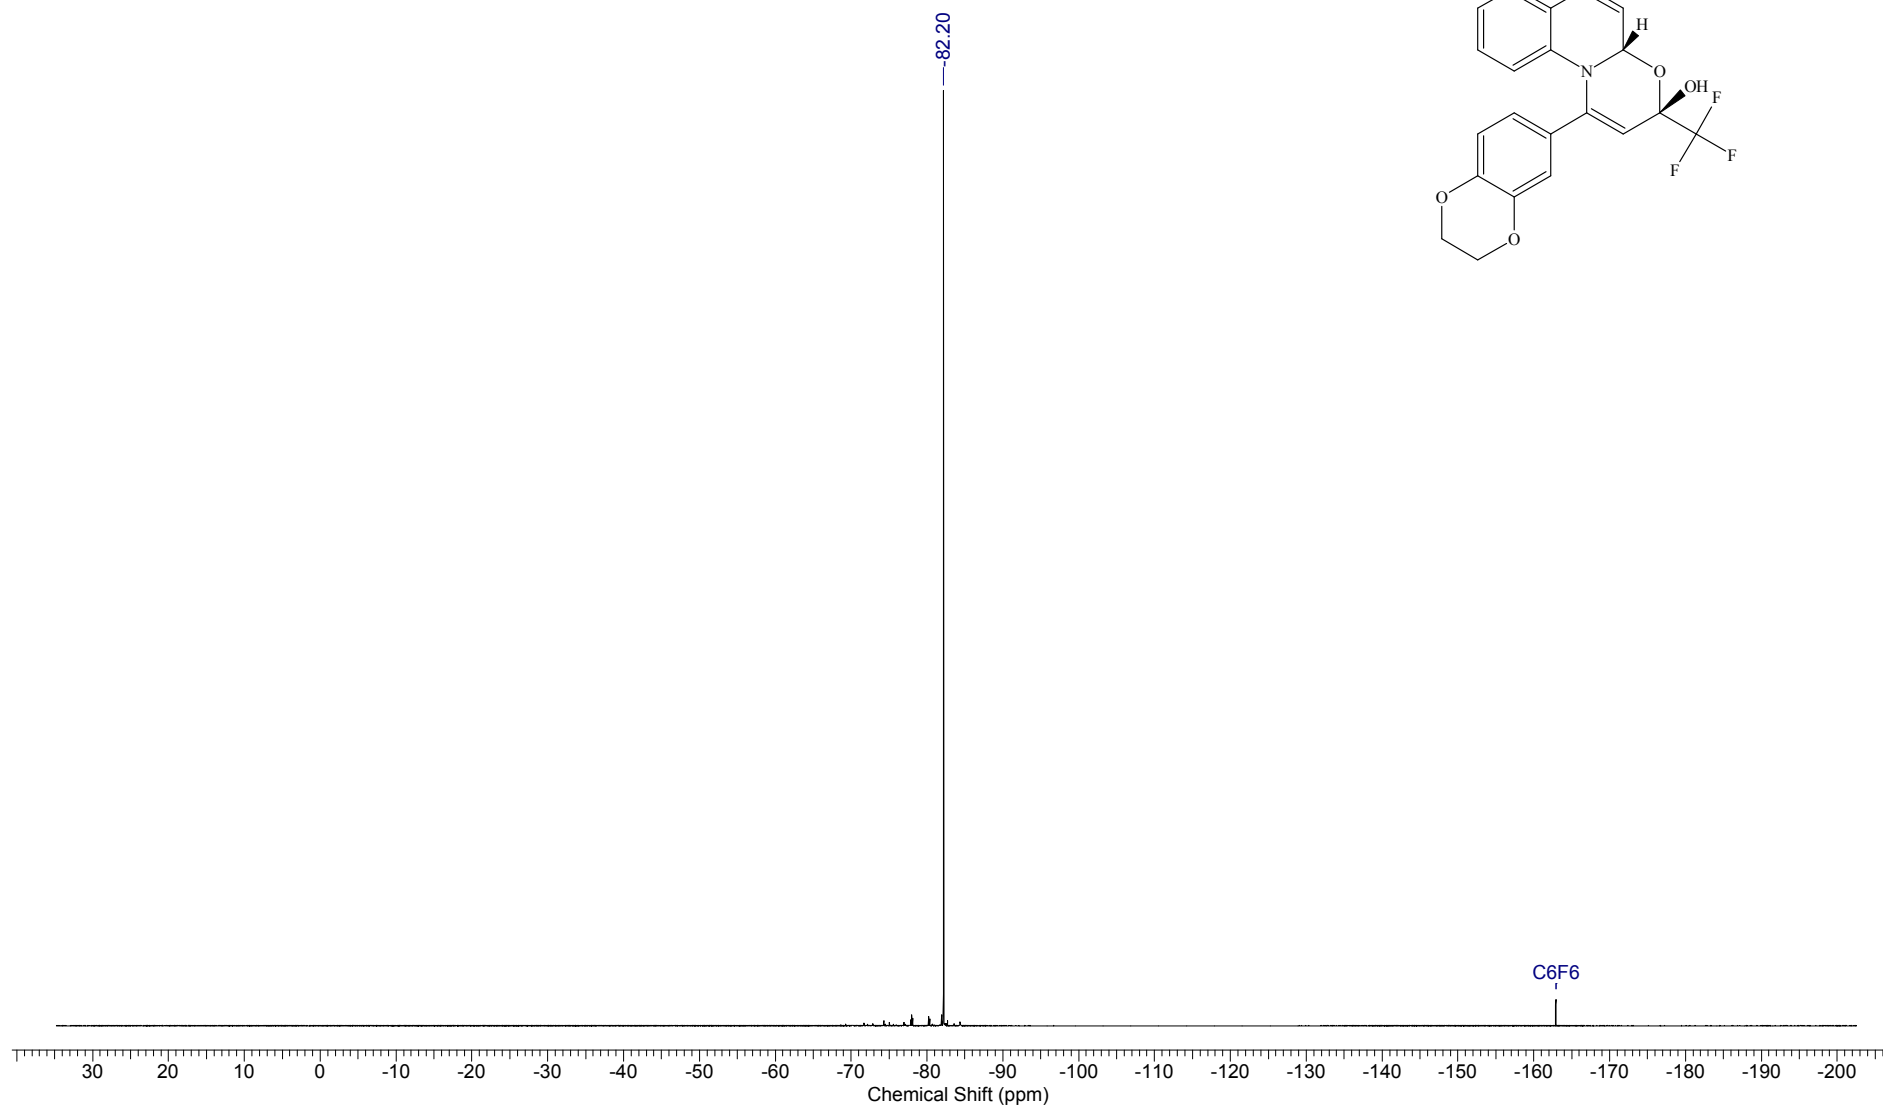

$^{19}\text{F}$  NMR spectrum of **3j** (376.5 MHz,  $\text{CD}_3\text{CN}$ )

|                               |                                                      |                              |                      |                         |                      |
|-------------------------------|------------------------------------------------------|------------------------------|----------------------|-------------------------|----------------------|
| <b>Acquisition Time (sec)</b> | 4.0894                                               | <b>Comment</b>               | Imported from UXNMR. | <b>Date</b>             | 12 Mar 2019 14:47:30 |
| <b>File Name</b>              | C:\DOCS\OUTPUT_301\2019\03.i\add\BM-1512-P.H_001001r | <b>Number of Transients</b>  | 4                    | <b>Frequency (MHz)</b>  | 400.13               |
| <b>Nucleus</b>                | <sup>1</sup> H                                       | <b>Original Points Count</b> | 32768                | <b>Points Count</b>     | 131072               |
| <b>Pulse Sequence</b>         | zg30                                                 | <b>Solvent</b>               | ACETONITRILE-D3      | <b>Sweep Width (Hz)</b> | 8012.82              |
| <b>Temperature (degree C)</b> | 27.000                                               |                              |                      |                         |                      |

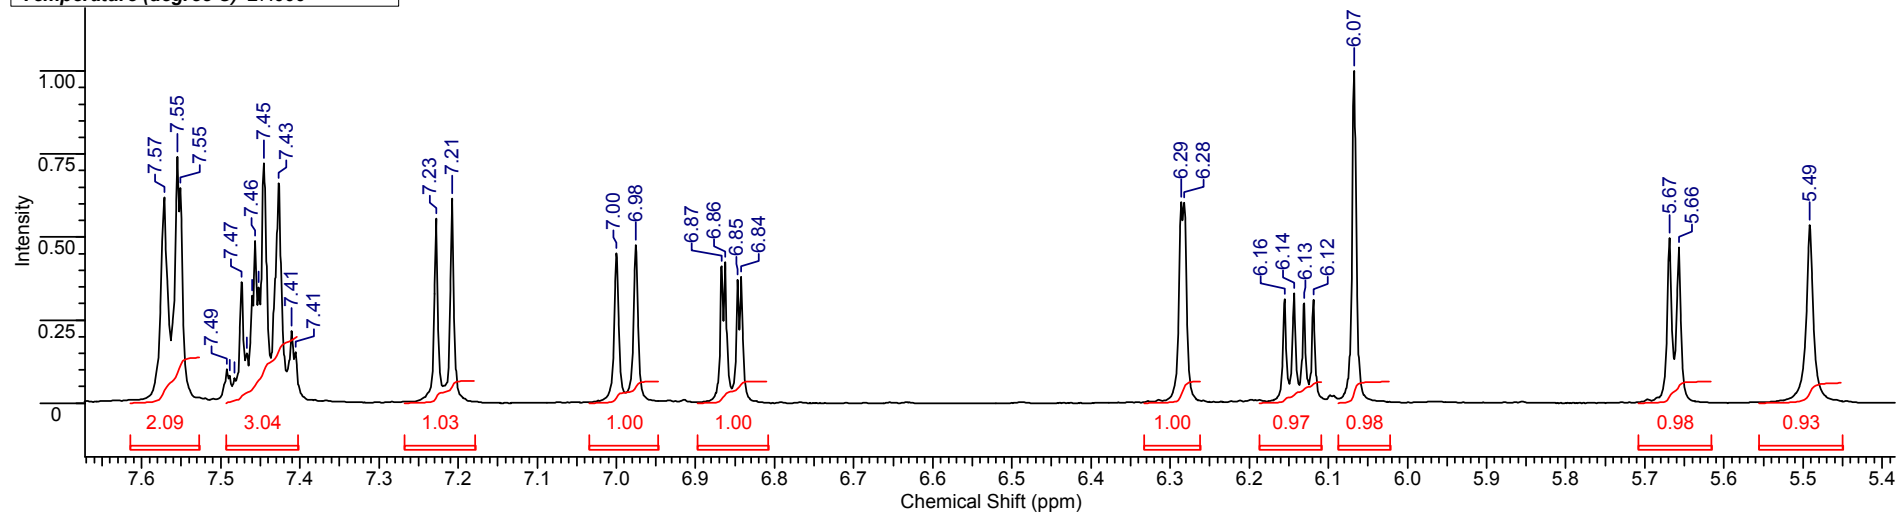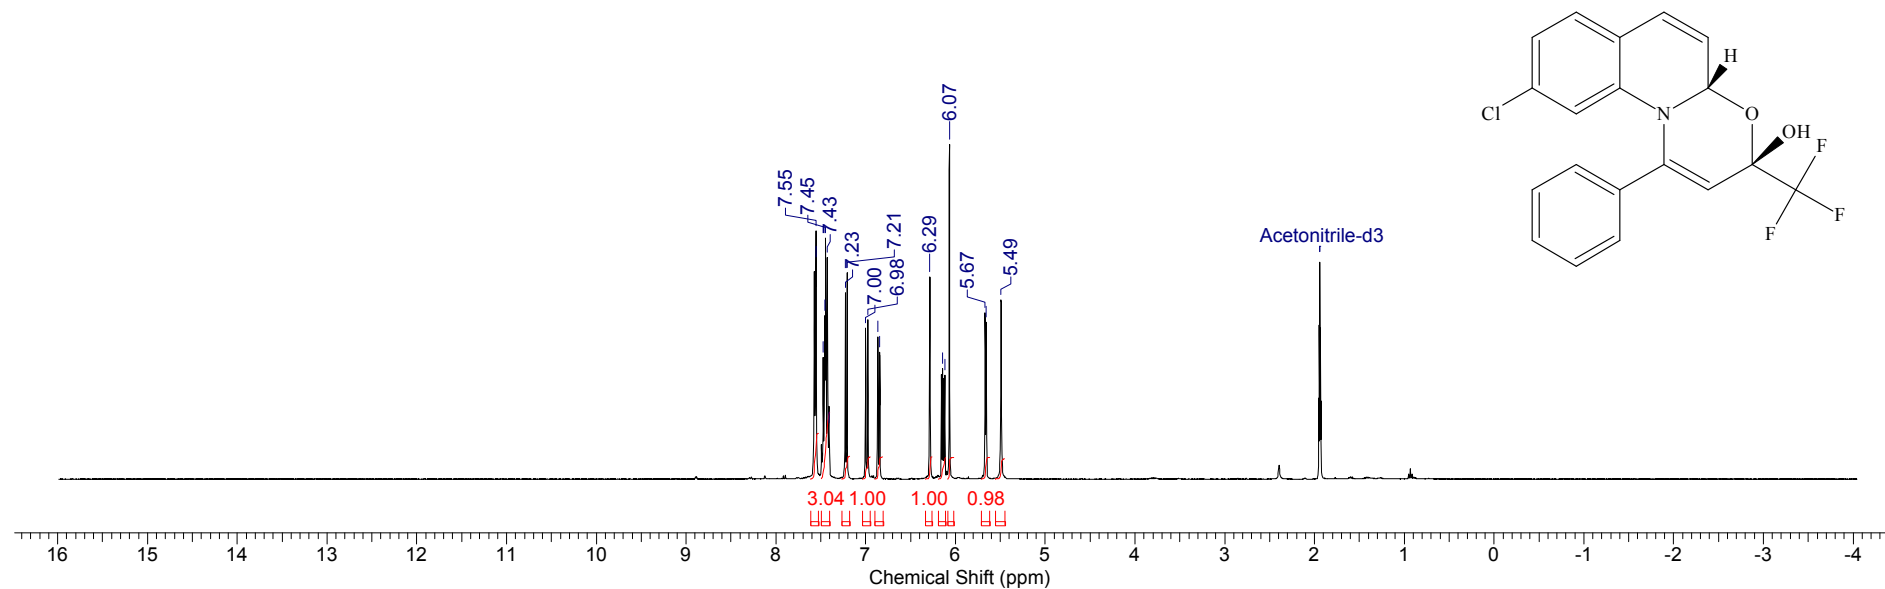<sup>1</sup>H NMR spectrum of **3k** (400.1 MHz, CD<sub>3</sub>CN)

|                               |                                                      |                              |                      |                               |             |                      |
|-------------------------------|------------------------------------------------------|------------------------------|----------------------|-------------------------------|-------------|----------------------|
| <b>Acquisition Time (sec)</b> | 0.6783                                               | <b>Comment</b>               | Imported from UXMNR. |                               | <b>Date</b> | 12 Mar 2019 15:31:56 |
| <b>File Name</b>              | C:\DOCS\OUTPUT_301\2019\03.i\add\BM-1512-P.C_002001r | <b>Frequency (MHz)</b>       | 100.61               | <b>Nucleus</b>                | 13C         |                      |
| <b>Number of Transients</b>   | 1116                                                 | <b>Original Points Count</b> | 16384                | <b>Points Count</b>           | 131072      |                      |
| <b>Solvent</b>                | CHLOROFORM-D                                         | <b>Sweep Width (Hz)</b>      | 24154.59             | <b>Pulse Sequence</b>         | zgpg30      |                      |
|                               |                                                      |                              |                      | <b>Temperature (degree C)</b> | 27.000      |                      |

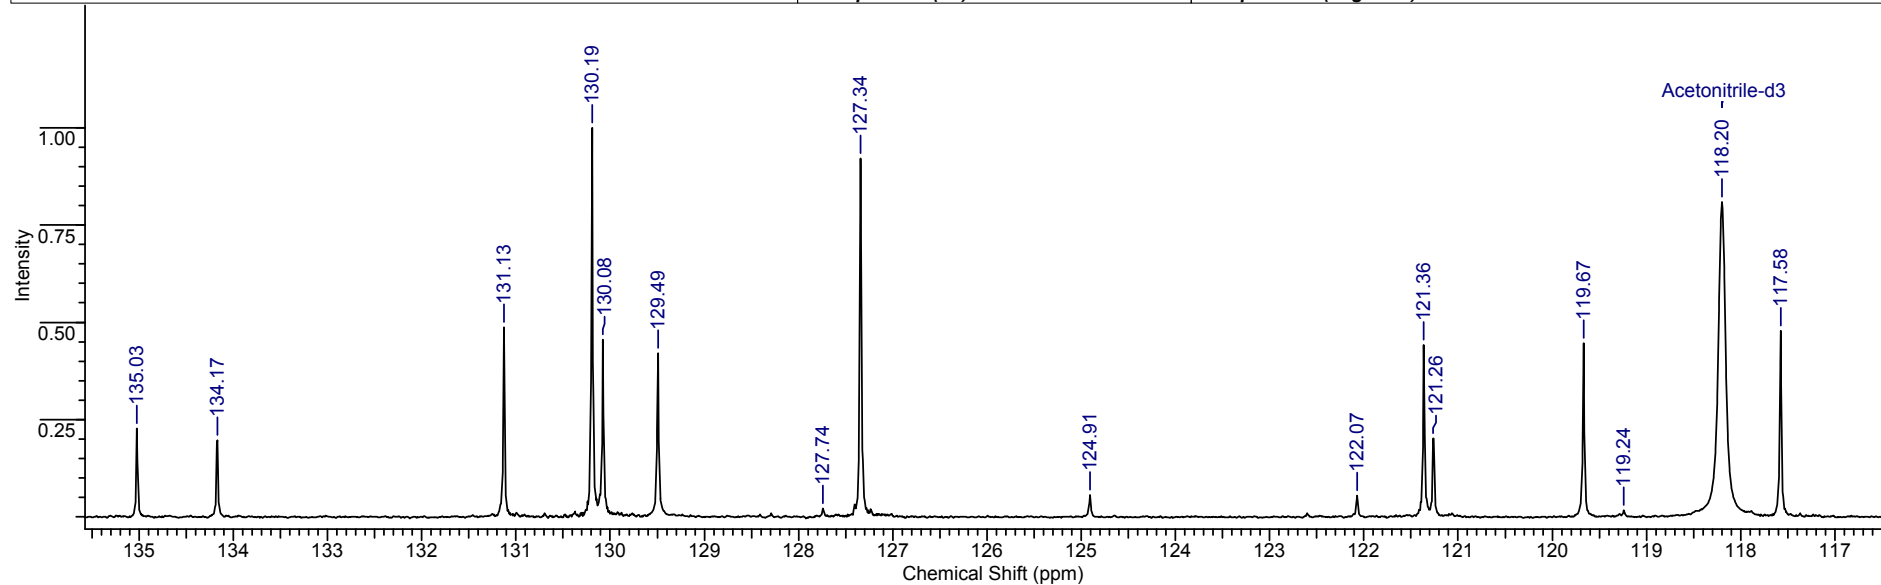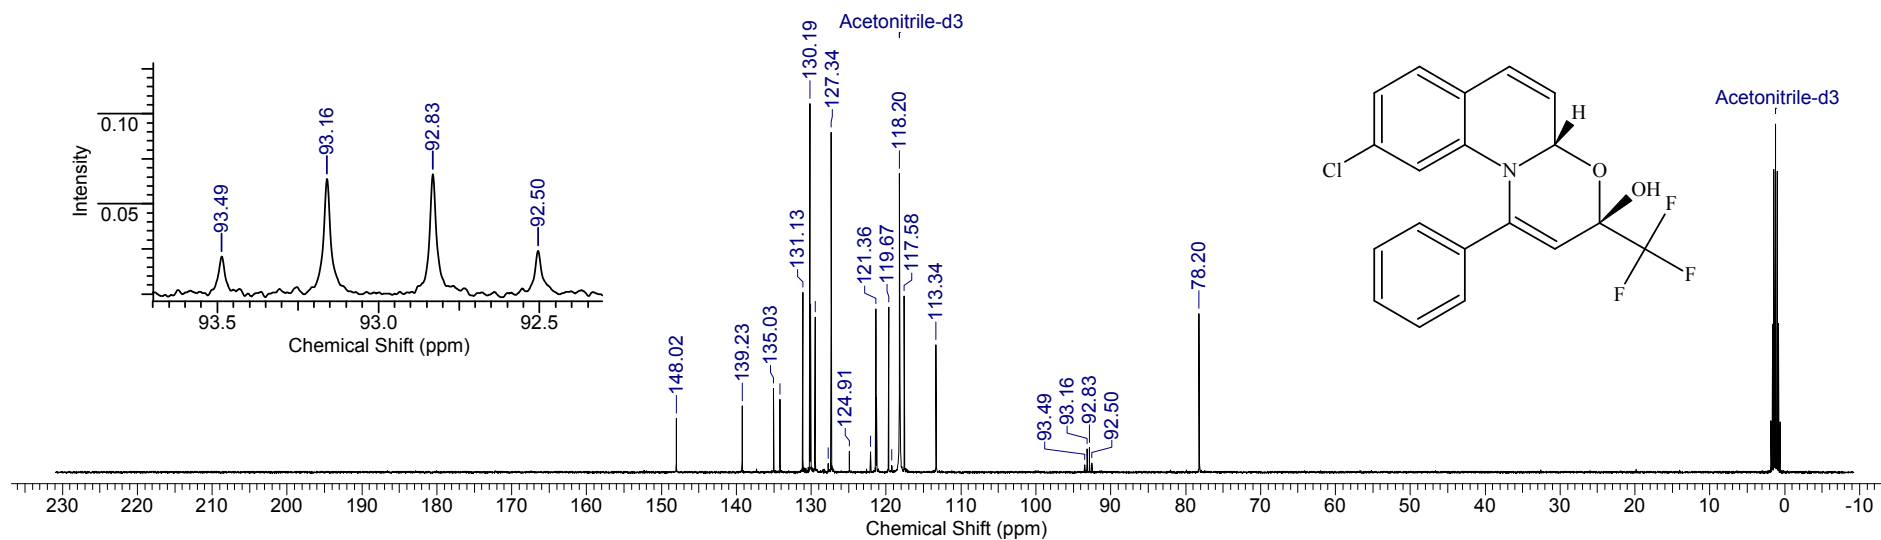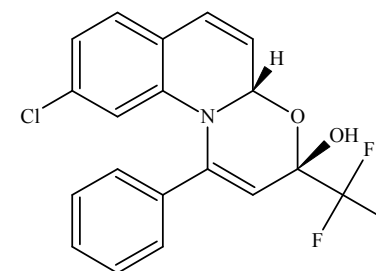

$^{13}\text{C}$  NMR spectrum of **3k** (100.6 MHz,  $\text{CD}_3\text{CN}$ )

|                        |          |                        |             |                      |                                                                    |                       |       |
|------------------------|----------|------------------------|-------------|----------------------|--------------------------------------------------------------------|-----------------------|-------|
| Acquisition Time (sec) | 0.7340   | Date                   | Mar 12 2019 | File Name            | C:\DOCS\OUTPUT_301\F19\2019.03.12\bm1512-f_20190312_01\FLUORINE_01 |                       |       |
| Frequency (MHz)        | 376.31   | Nucleus                | 19F         | Number of Transients | 100                                                                | Original Points Count | 65536 |
| Points Count           | 65536    | Pulse Sequence         | s2pul       | Solvent              | ACETONITRILE-D3                                                    |                       |       |
| Sweep Width (Hz)       | 89285.71 | Temperature (degree C) | 22.000      |                      |                                                                    |                       |       |

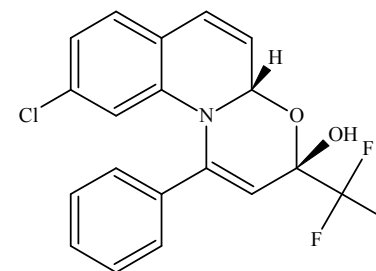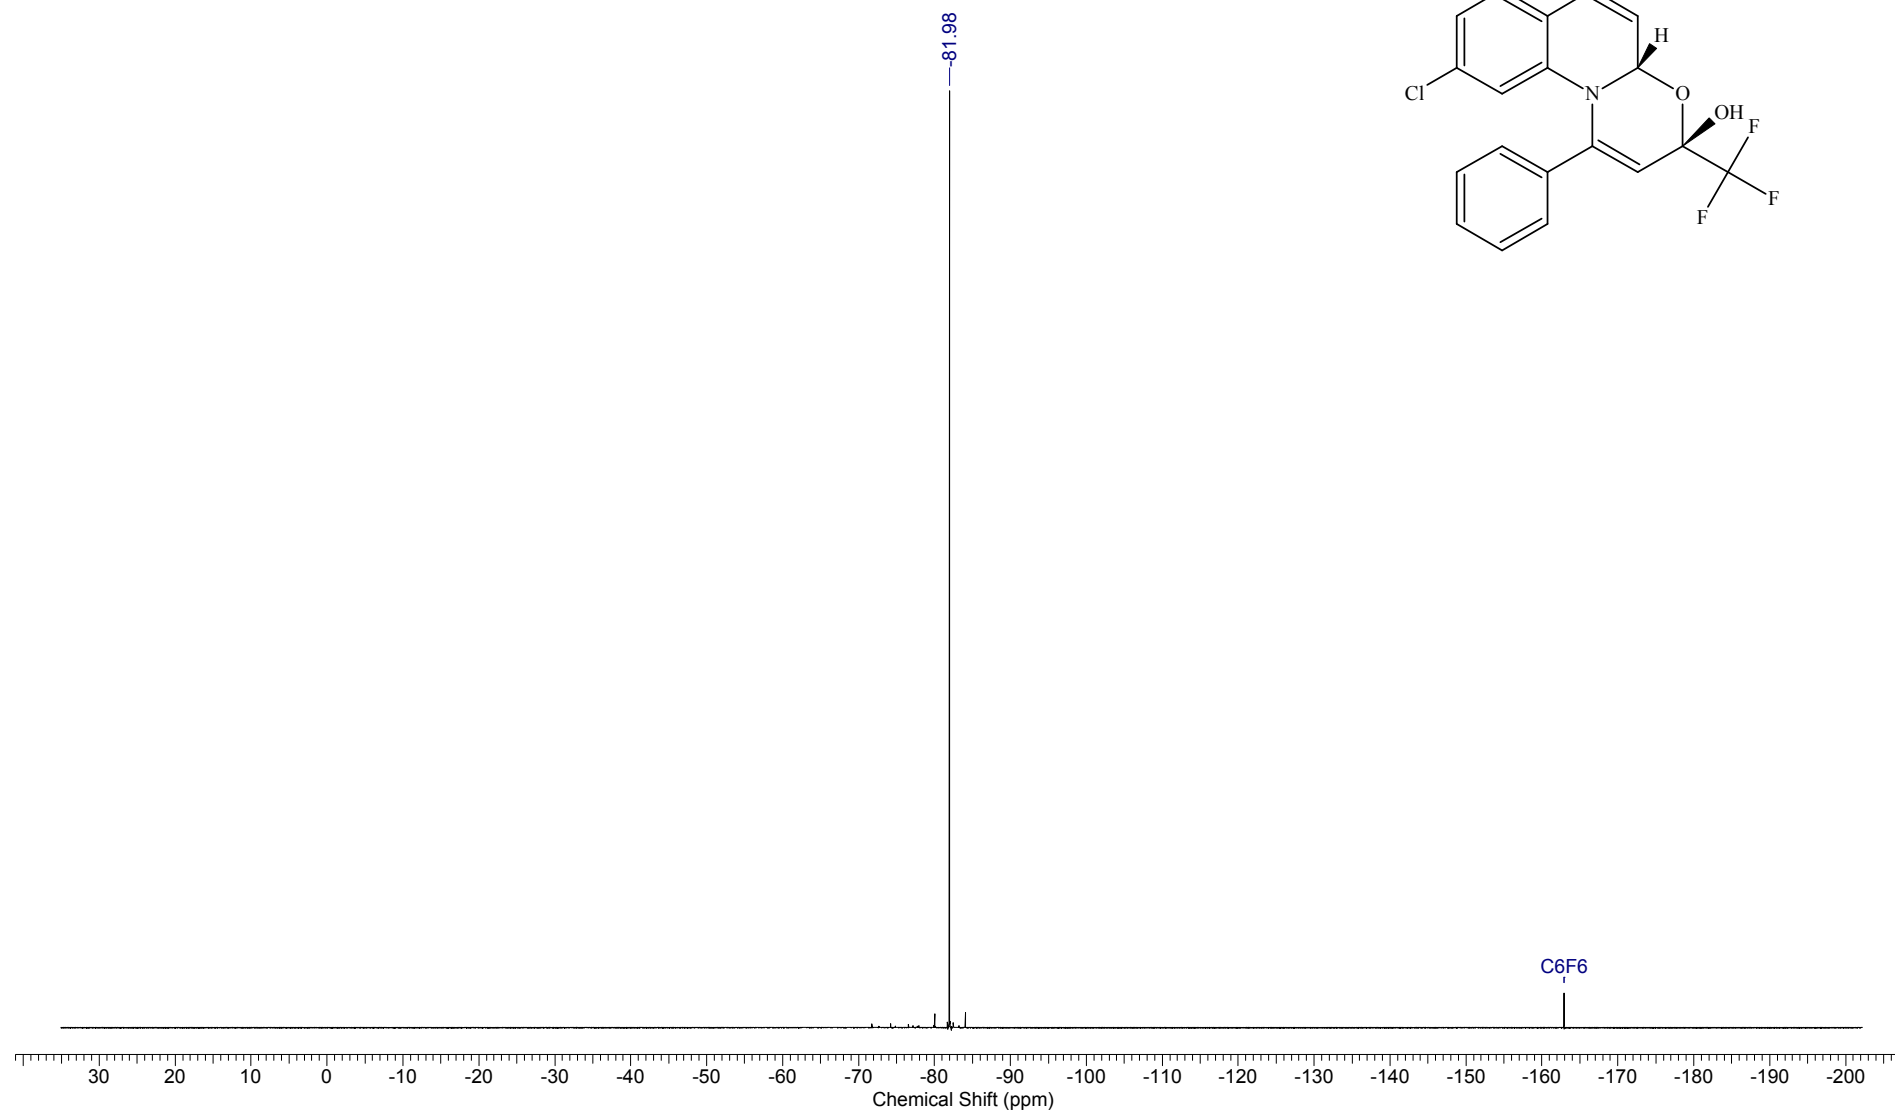

$^{19}\text{F}$  NMR spectrum of **3k** (376.5 MHz,  $\text{CD}_3\text{CN}$ )

|           |          |                |                                                                  |
|-----------|----------|----------------|------------------------------------------------------------------|
| <b>FW</b> | 379.7600 | <b>Formula</b> | C <sub>19</sub> H <sub>13</sub> ClF <sub>3</sub> NO <sub>2</sub> |
|-----------|----------|----------------|------------------------------------------------------------------|

|                               |                                                             |                             |                      |                              |             |                               |        |
|-------------------------------|-------------------------------------------------------------|-----------------------------|----------------------|------------------------------|-------------|-------------------------------|--------|
| <b>Acquisition Time (sec)</b> | 4.0894                                                      | <b>Comment</b>              | Imported from UXNMR. |                              | <b>Date</b> | 18 Oct 2018 22:21:32          |        |
| <b>File Name</b>              | C:\DOCS\OUTPUT_301\2018\10.i\éyááú\bm181018\BM-1404_001001r |                             |                      | <b>Frequency (MHz)</b>       | 400.13      |                               |        |
| <b>Nucleus</b>                | 1H                                                          | <b>Number of Transients</b> | 8                    | <b>Original Points Count</b> | 32768       | <b>Points Count</b>           | 131072 |
| <b>Pulse Sequence</b>         | zg30                                                        | <b>Solvent</b>              | Tol                  | <b>Sweep Width (Hz)</b>      | 8012.82     | <b>Temperature (degree C)</b> | 27.000 |

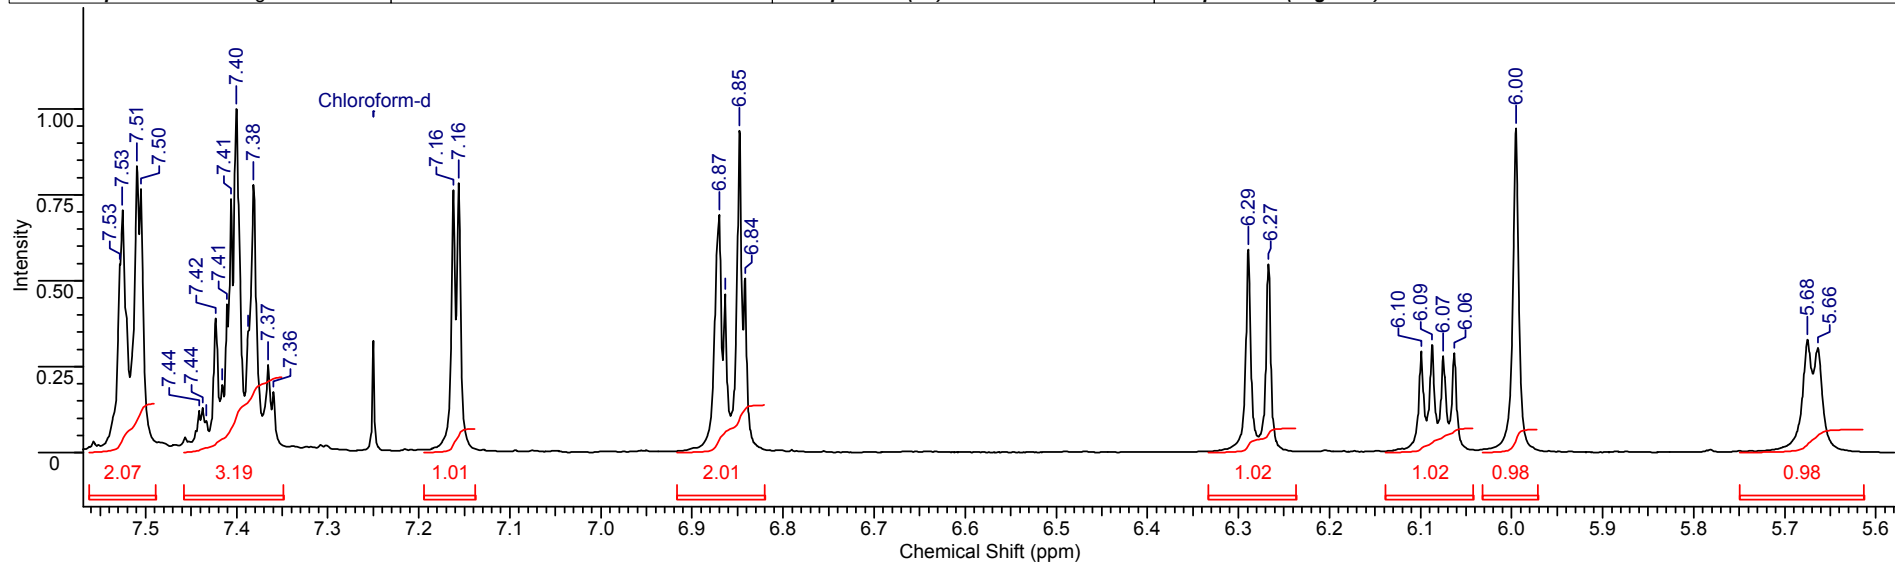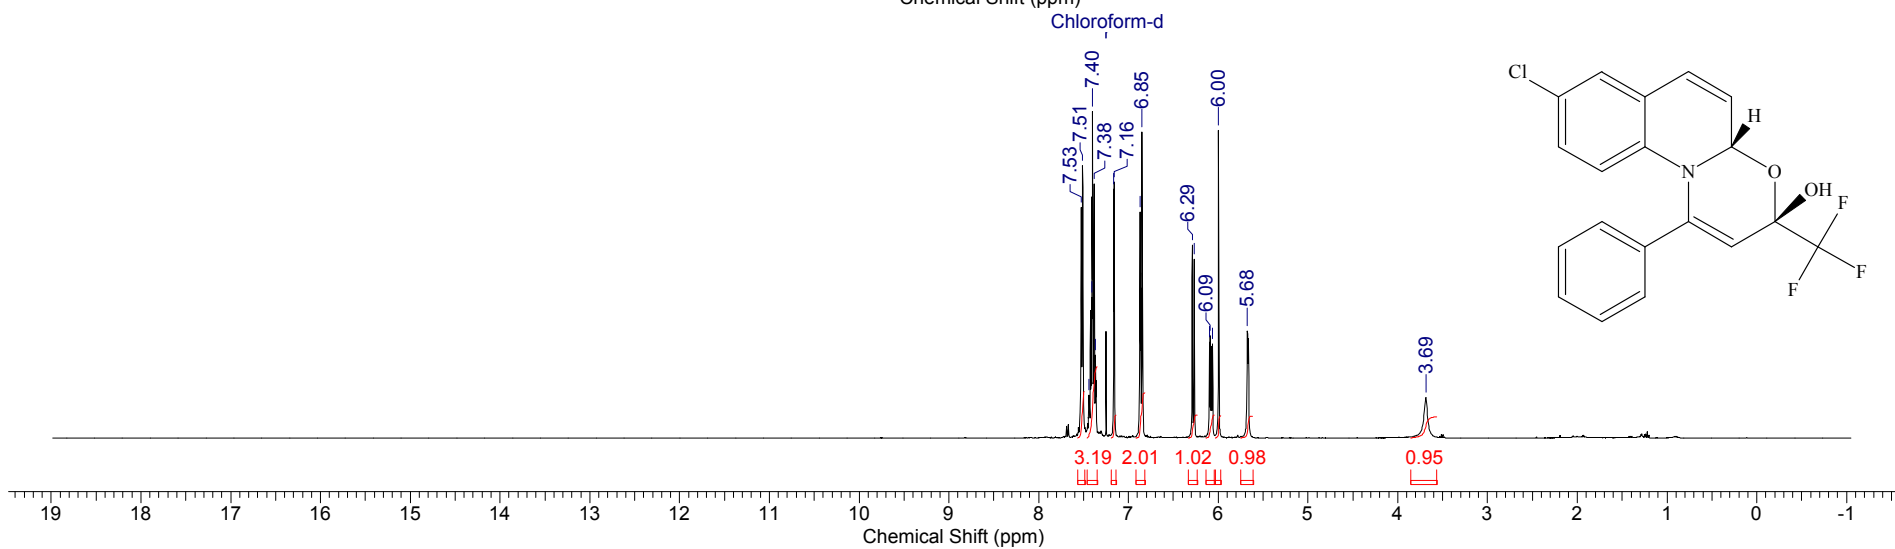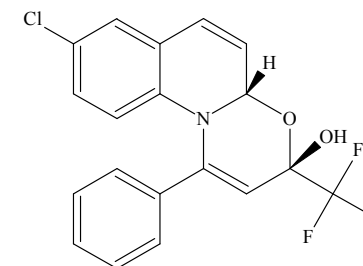

<sup>1</sup>H NMR spectrum of **3I** (400.1 MHz, CDCl<sub>3</sub>)

|           |          |                |                                                                  |
|-----------|----------|----------------|------------------------------------------------------------------|
| <b>FW</b> | 379.7600 | <b>Formula</b> | C <sub>19</sub> H <sub>13</sub> ClF <sub>3</sub> NO <sub>2</sub> |
|-----------|----------|----------------|------------------------------------------------------------------|

|                               |          |                               |             |                             |                                                                   |                              |       |
|-------------------------------|----------|-------------------------------|-------------|-----------------------------|-------------------------------------------------------------------|------------------------------|-------|
| <b>Acquisition Time (sec)</b> | 1.0000   | <b>Date</b>                   | Oct 19 2018 | <b>File Name</b>            | C:\DOCS\OUTPUT_301\F19\2018.10.19\BM-1404_20181019_01\FLUORINE_01 |                              |       |
| <b>Frequency (MHz)</b>        | 376.31   | <b>Nucleus</b>                | 19F         | <b>Number of Transients</b> | 32                                                                | <b>Original Points Count</b> | 89286 |
| <b>Points Count</b>           | 131072   | <b>Pulse Sequence</b>         | s2pul       | <b>Solvent</b>              | CHLOROFORM-D                                                      |                              |       |
| <b>Sweep Width (Hz)</b>       | 89285.71 | <b>Temperature (degree C)</b> | 22.000      |                             |                                                                   |                              |       |

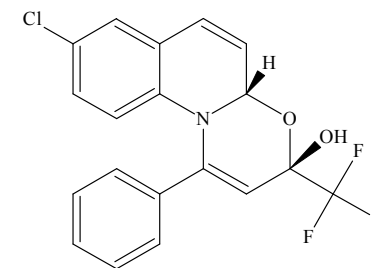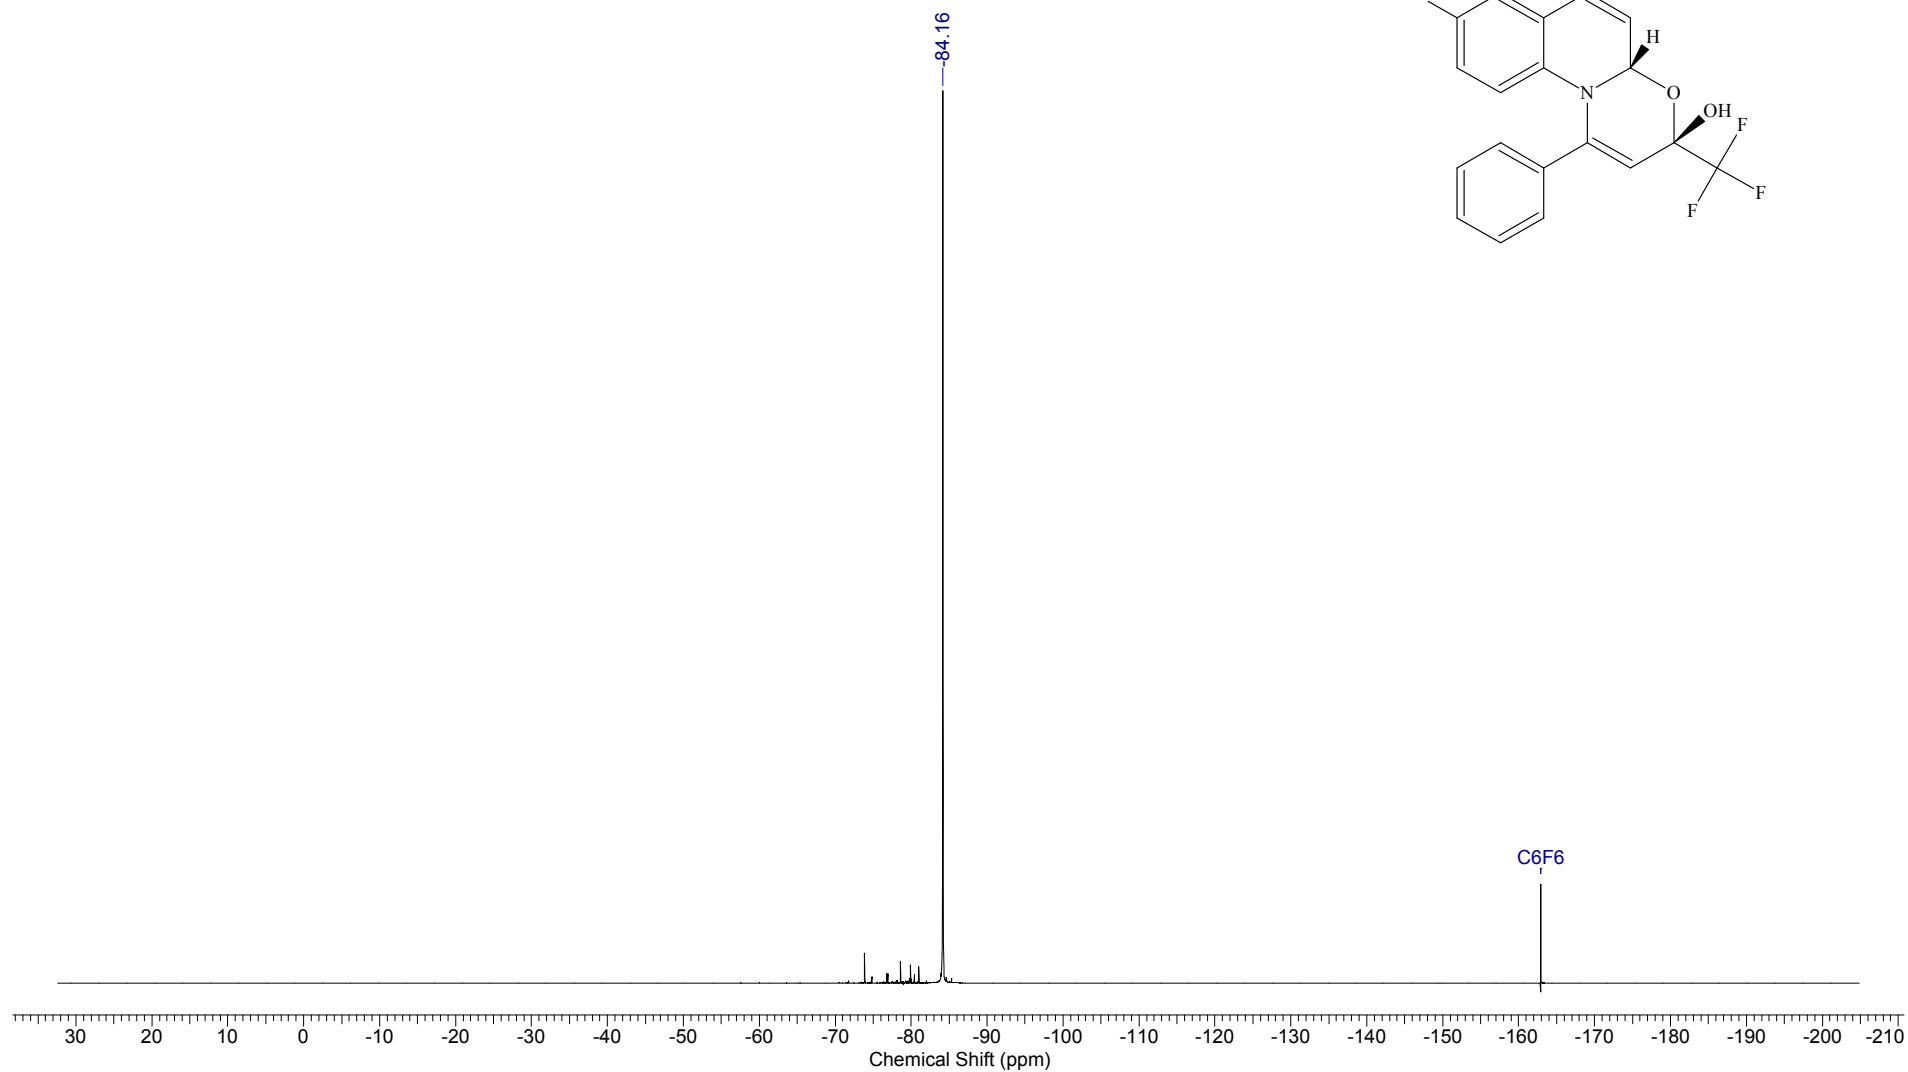

<sup>19</sup>F NMR spectrum of **3I** (376.5 MHz, CDCl<sub>3</sub>)



FW 370.3247 Formula C<sub>20</sub>H<sub>13</sub>F<sub>3</sub>N<sub>2</sub>O<sub>2</sub>

|                        |                                                      |                      |                      |                       |                      |
|------------------------|------------------------------------------------------|----------------------|----------------------|-----------------------|----------------------|
| Acquisition Time (sec) | 2.5559                                               | Comment              | Imported from UXMNR. | Date                  | 03 Oct 2018 17:50:24 |
| File Name              | C:\DOCS\OUTPUT_301\2018\10.i έγάδι\BM-1380.H_001001r |                      |                      | Frequency (MHz)       | 400.13               |
| Nucleus                | 1H                                                   | Number of Transients | 4                    | Original Points Count | 16384                |
| Pulse Sequence         | zg30                                                 | Solvent              | CHLOROFORM-D         | Points Count          | 65536                |
| Temperature (degree C) | 27.000                                               |                      |                      | Sweep Width (Hz)      | 6410.26              |

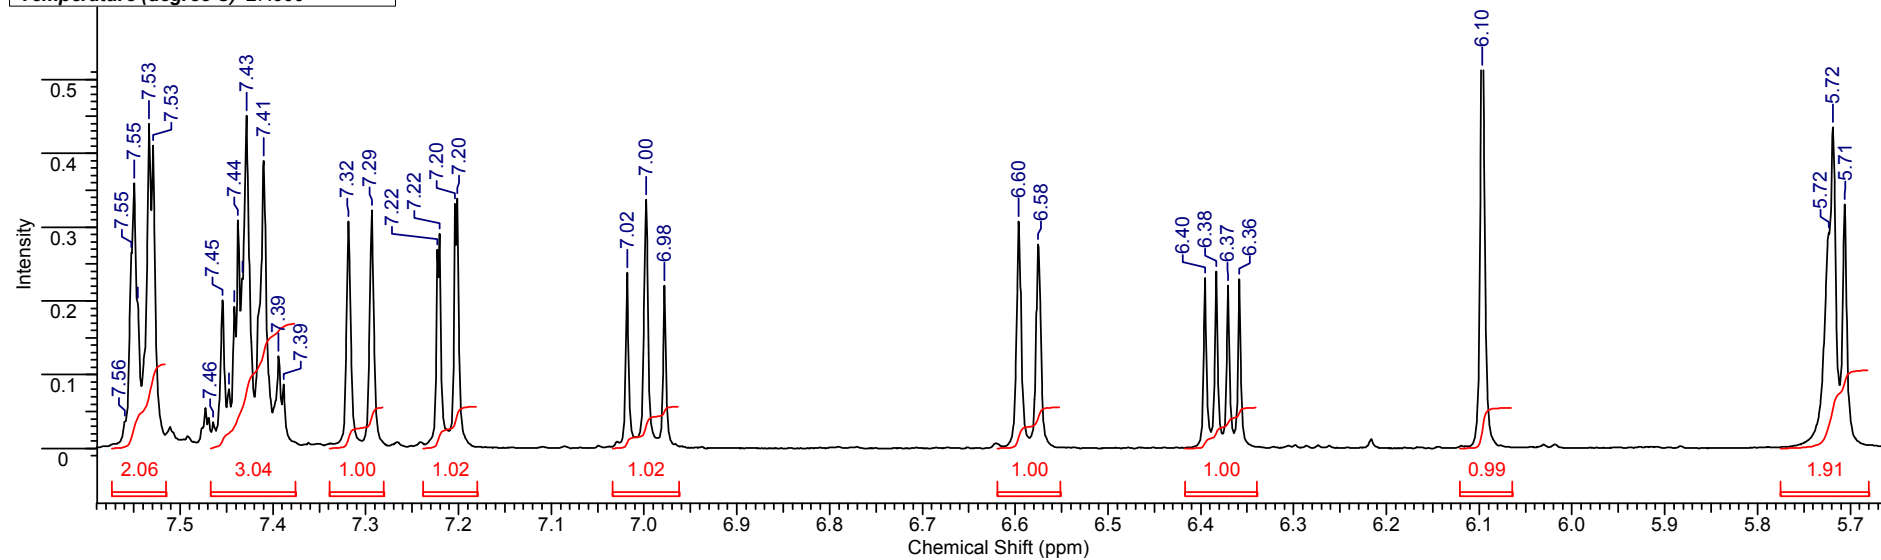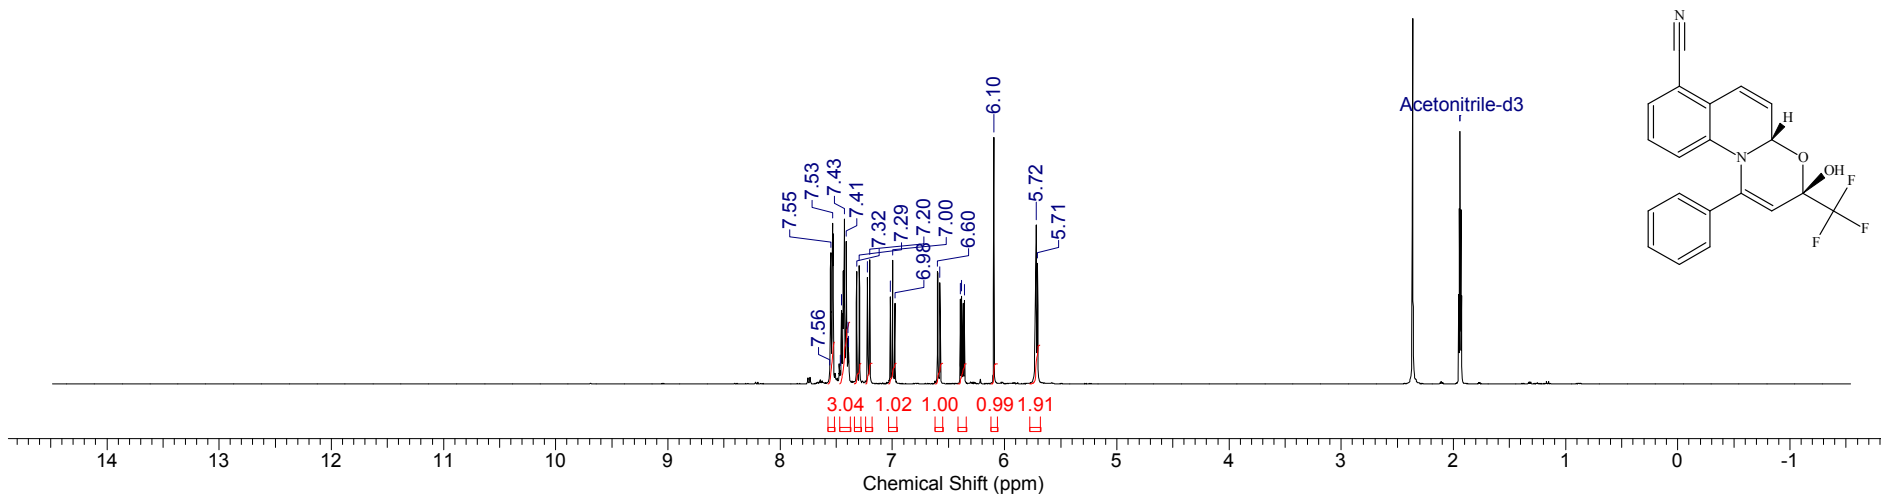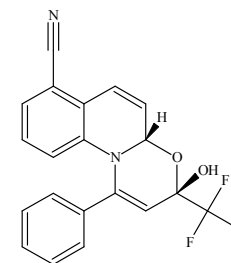

<sup>1</sup>H NMR spectrum of **3m** (400.1 MHz, CD<sub>3</sub>CN)

|           |          |                |                                                                              |
|-----------|----------|----------------|------------------------------------------------------------------------------|
| <b>FW</b> | 370.3247 | <b>Formula</b> | C <sub>20</sub> H <sub>13</sub> F <sub>3</sub> N <sub>2</sub> O <sub>2</sub> |
|-----------|----------|----------------|------------------------------------------------------------------------------|

|                               |           |                               |            |                             |                                                                     |                              |        |
|-------------------------------|-----------|-------------------------------|------------|-----------------------------|---------------------------------------------------------------------|------------------------------|--------|
| <b>Acquisition Time (sec)</b> | 2.3069    | <b>Date</b>                   | Oct 4 2018 | <b>File Name</b>            | C:\DOCS\OUTPUT_301\F19\2018.10.04\BM-1380-F_20181004_01\FLUORINE_01 |                              |        |
| <b>Frequency (MHz)</b>        | 376.32    | <b>Nucleus</b>                | 19F        | <b>Number of Transients</b> | 8                                                                   | <b>Original Points Count</b> | 262144 |
| <b>Points Count</b>           | 262144    | <b>Pulse Sequence</b>         | s2pul      | <b>Solvent</b>              | ACETONITRILE-D3                                                     |                              |        |
| <b>Sweep Width (Hz)</b>       | 113636.37 | <b>Temperature (degree C)</b> | 22.000     |                             |                                                                     |                              |        |

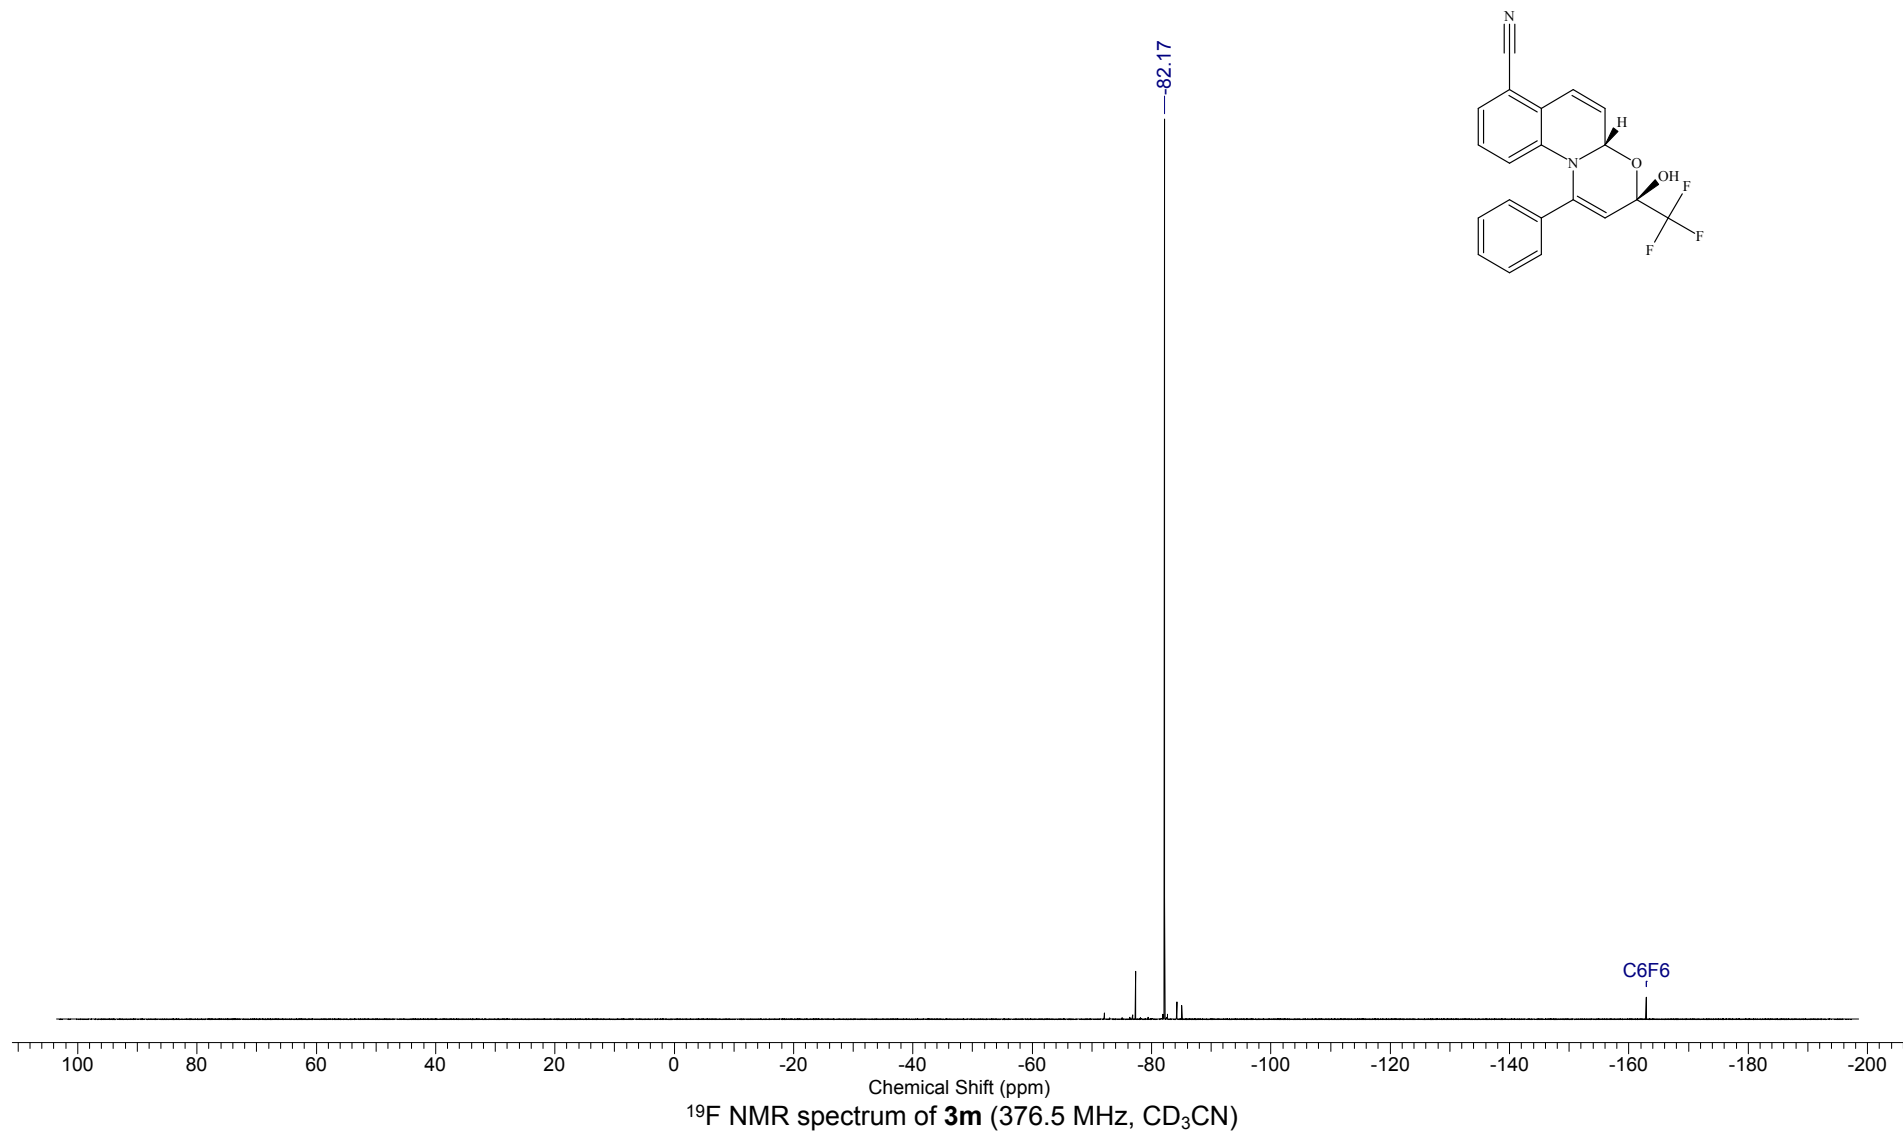



FW 424.2113      **Formula** C<sub>19</sub>H<sub>13</sub>BrF<sub>3</sub>NO<sub>2</sub>

|                               |                                                     |                             |                      |                              |                        |                               |        |
|-------------------------------|-----------------------------------------------------|-----------------------------|----------------------|------------------------------|------------------------|-------------------------------|--------|
| <b>Acquisition Time (sec)</b> | 0.4999                                              | <b>Comment</b>              | Imported from UXNMR. |                              | <b>Date</b>            | 17 Oct 2018 17:16:02          |        |
| <b>File Name</b>              | C:\DOCS\OUTPUT_301\2018\10.10\301\BM-1402.C_002001r |                             |                      |                              | <b>Frequency (MHz)</b> | 100.61                        |        |
| <b>Nucleus</b>                | <sup>13</sup> C                                     | <b>Number of Transients</b> | 128                  | <b>Original Points Count</b> | 12076                  | <b>Points Count</b>           | 65536  |
| <b>Pulse Sequence</b>         | zgpg30                                              | <b>Solvent</b>              | DMSO-D6              | <b>Sweep Width (Hz)</b>      | 24154.59               | <b>Temperature (degree C)</b> | 27.000 |

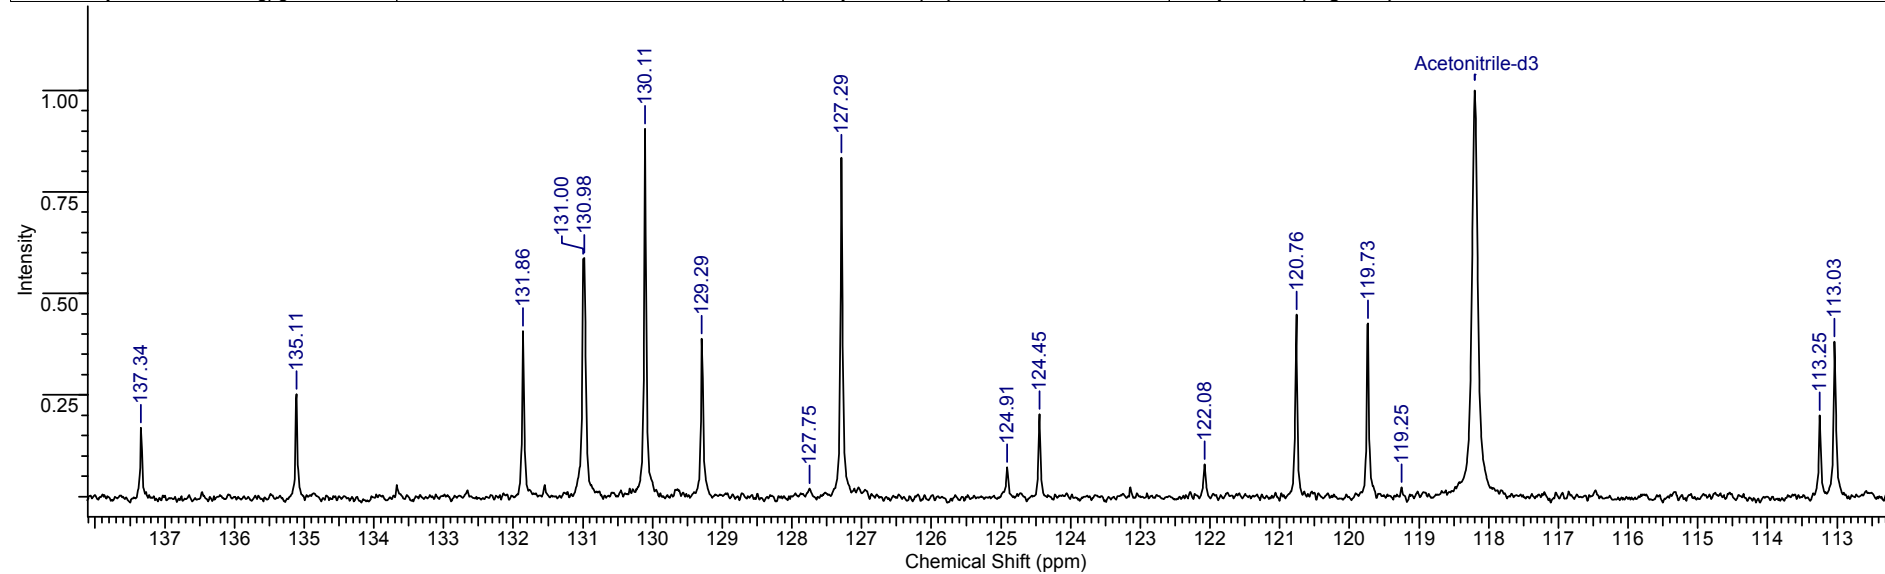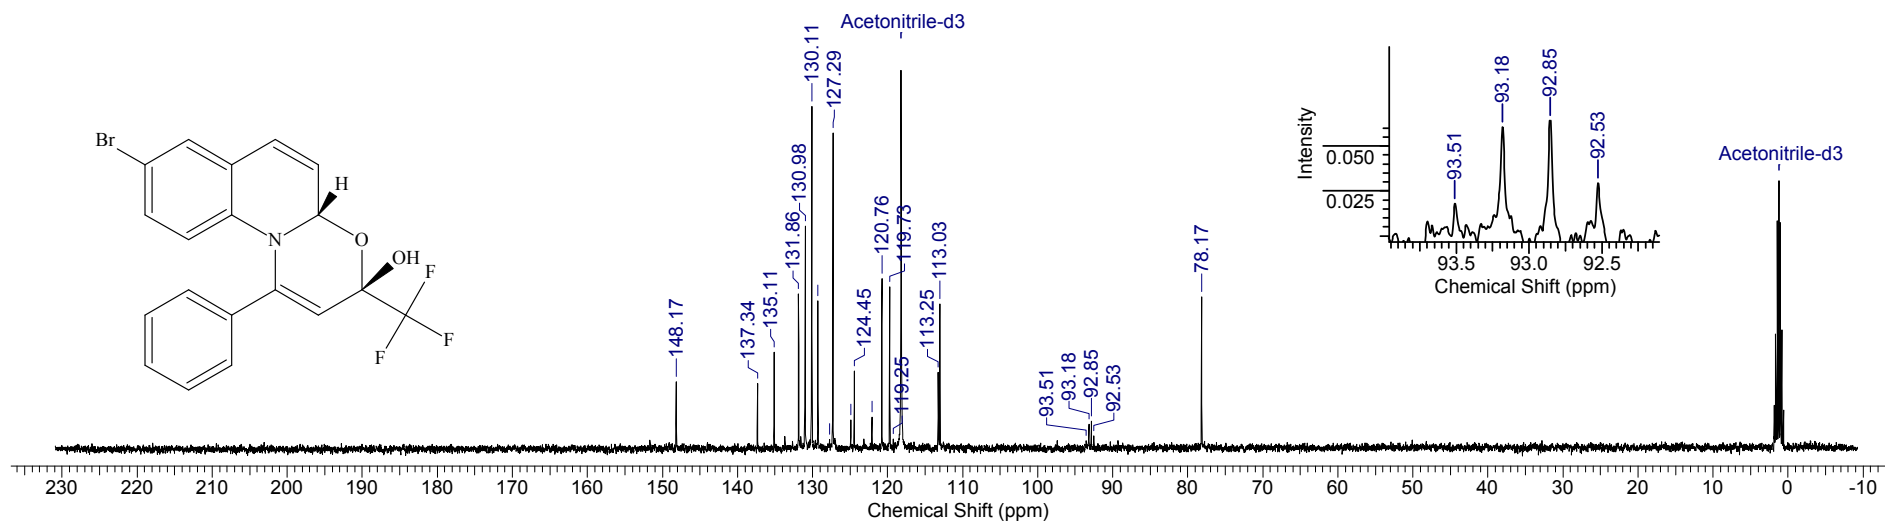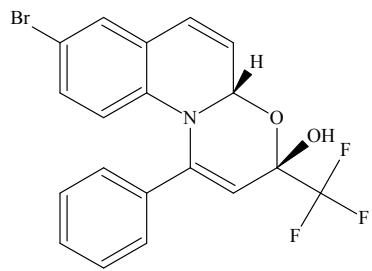

<sup>13</sup>C NMR spectrum of **3n** (100.6 MHz, CD<sub>3</sub>CN)

|                    |                                                                                 |
|--------------------|---------------------------------------------------------------------------------|
| <b>FW</b> 424.2113 | <b>Formula</b> C <sub>19</sub> H <sub>13</sub> BrF <sub>3</sub> NO <sub>2</sub> |
|--------------------|---------------------------------------------------------------------------------|

|                                      |                                      |                                                                                        |                                     |
|--------------------------------------|--------------------------------------|----------------------------------------------------------------------------------------|-------------------------------------|
| <b>Acquisition Time (sec)</b> 2.3069 | <b>Date</b> Oct 18 2018              | <b>File Name</b> C:\DOCS\OUTPUT_301\F19\2018.10.18\BM-1402-2-F_20181018_01\FLUORINE_01 |                                     |
| <b>Frequency (MHz)</b> 376.32        | <b>Nucleus</b> 19F                   | <b>Number of Transients</b> 8                                                          | <b>Original Points Count</b> 262144 |
| <b>Points Count</b> 262144           | <b>Pulse Sequence</b> s2pul          | <b>Solvent</b> ACETONITRILE-D3                                                         |                                     |
| <b>Sweep Width (Hz)</b> 113636.37    | <b>Temperature (degree C)</b> 22.000 |                                                                                        |                                     |

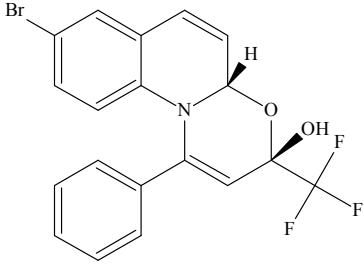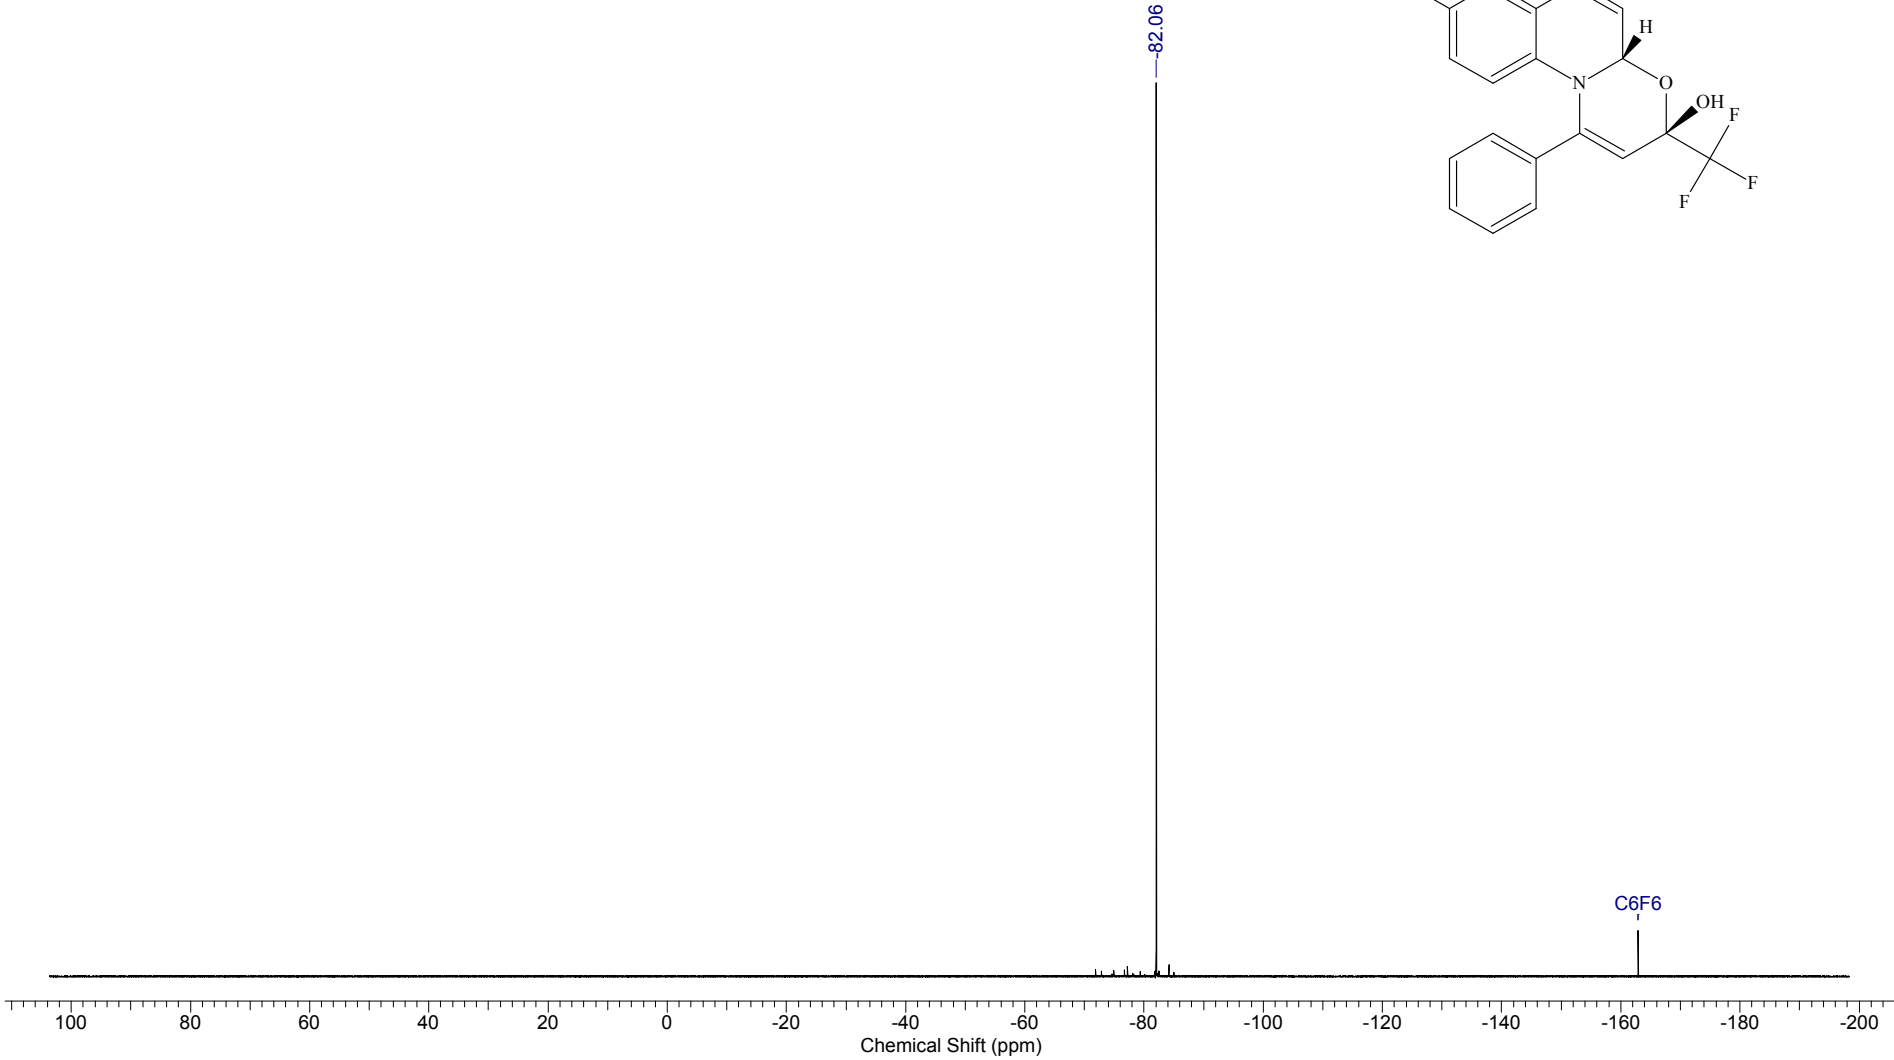

<sup>19</sup>F NMR spectrum of **3n** (376.5 MHz, CD<sub>3</sub>CN)

FW 424.2113      **Formula** C<sub>19</sub>H<sub>13</sub>BrF<sub>3</sub>NO<sub>2</sub>

|                               |                                                                    |                             |                      |                              |                      |
|-------------------------------|--------------------------------------------------------------------|-----------------------------|----------------------|------------------------------|----------------------|
| <b>Acquisition Time (sec)</b> | 2.5559                                                             | <b>Comment</b>              | Imported from UXMNR. | <b>Date</b>                  | 04 Oct 2018 08:19:12 |
| <b>File Name</b>              | C:\DOCS\OUTPUT_301\2018\10.1.10\1001\BM-1381.H\BM-1381_H_001000fid |                             |                      | <b>Frequency (MHz)</b>       | 400.13               |
| <b>Nucleus</b>                | 1H                                                                 | <b>Number of Transients</b> | 4                    | <b>Original Points Count</b> | 16384                |
| <b>Pulse Sequence</b>         | zg30                                                               | <b>Solvent</b>              | ACETONITRILE-D3      | <b>Sweep Width (Hz)</b>      | 6410.26              |
| <b>Temperature (degree C)</b> | 27.000                                                             |                             |                      |                              |                      |

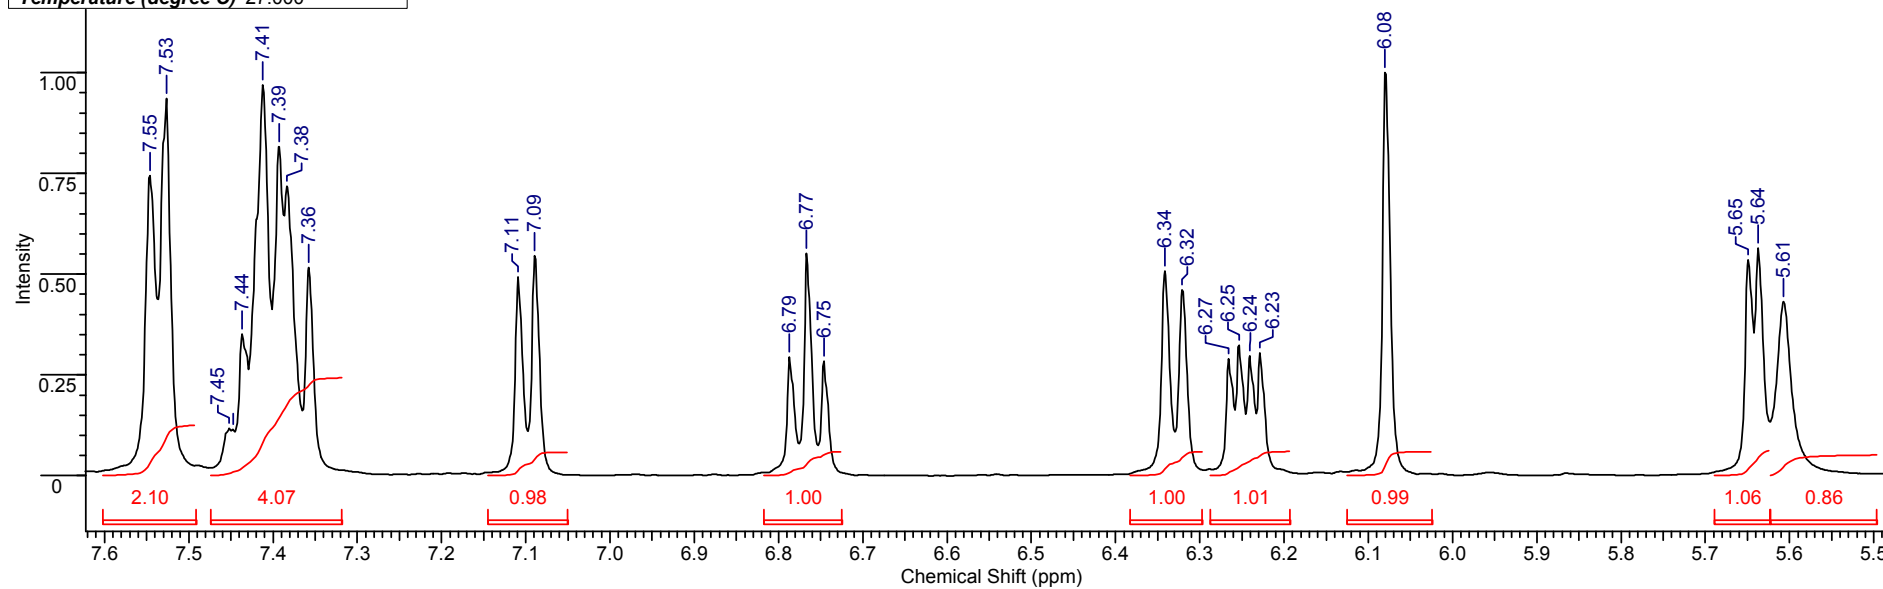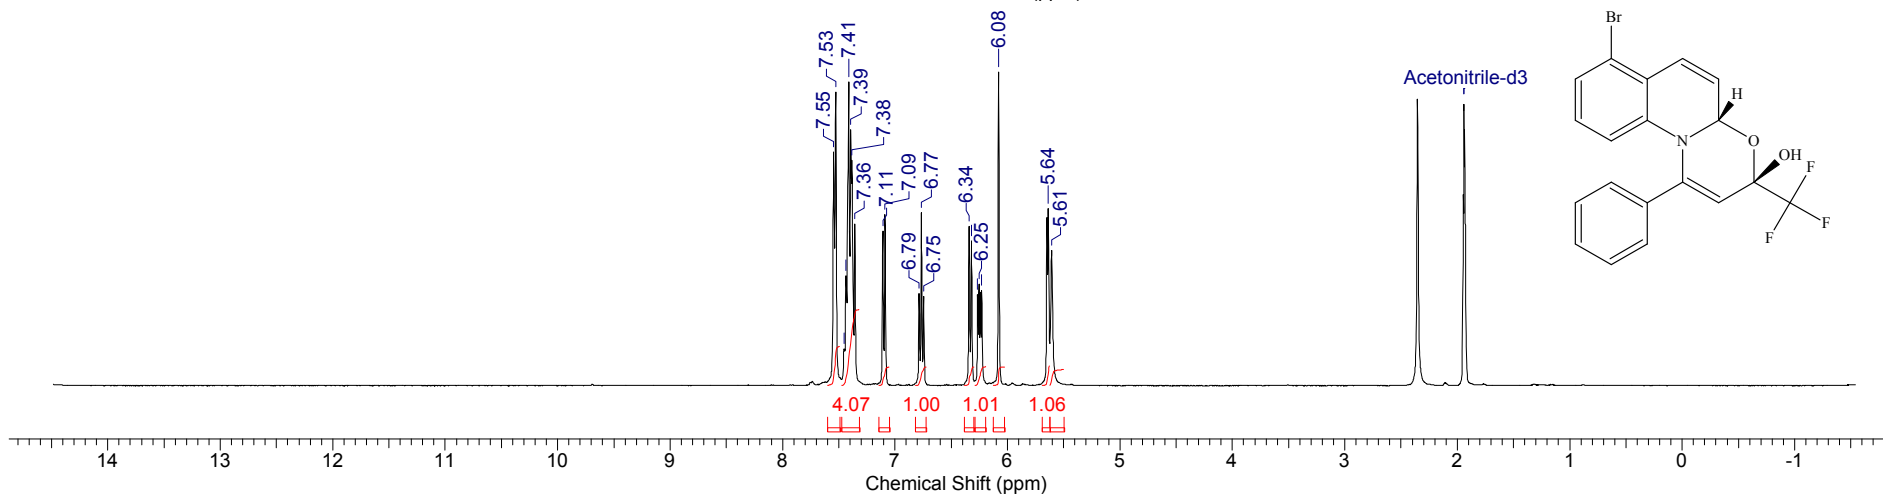

<sup>1</sup>H NMR spectrum of **3o** (400.1 MHz, CD<sub>3</sub>CN)

FW 424.2113 Formula C<sub>19</sub>H<sub>13</sub>BrF<sub>3</sub>NO<sub>2</sub>

|                        |          |                        |            |                      |                                                                   |                             |
|------------------------|----------|------------------------|------------|----------------------|-------------------------------------------------------------------|-----------------------------|
| Acquisition Time (sec) | 1.0000   | Date                   | Oct 5 2018 | File Name            | C:\DOCS\OUTPUT_301\F19\2018.10.05\BM-1381_20181005_01\FLUORINE_01 |                             |
| Frequency (MHz)        | 376.31   | Nucleus                | 19F        | Number of Transients | 32                                                                | Original Points Count 89286 |
| Points Count           | 131072   | Pulse Sequence         | s2pul      | Solvent              | ACETONITRILE-D3                                                   |                             |
| Sweep Width (Hz)       | 89285.71 | Temperature (degree C) | 22.000     |                      |                                                                   |                             |

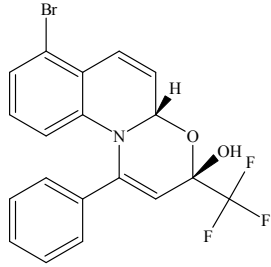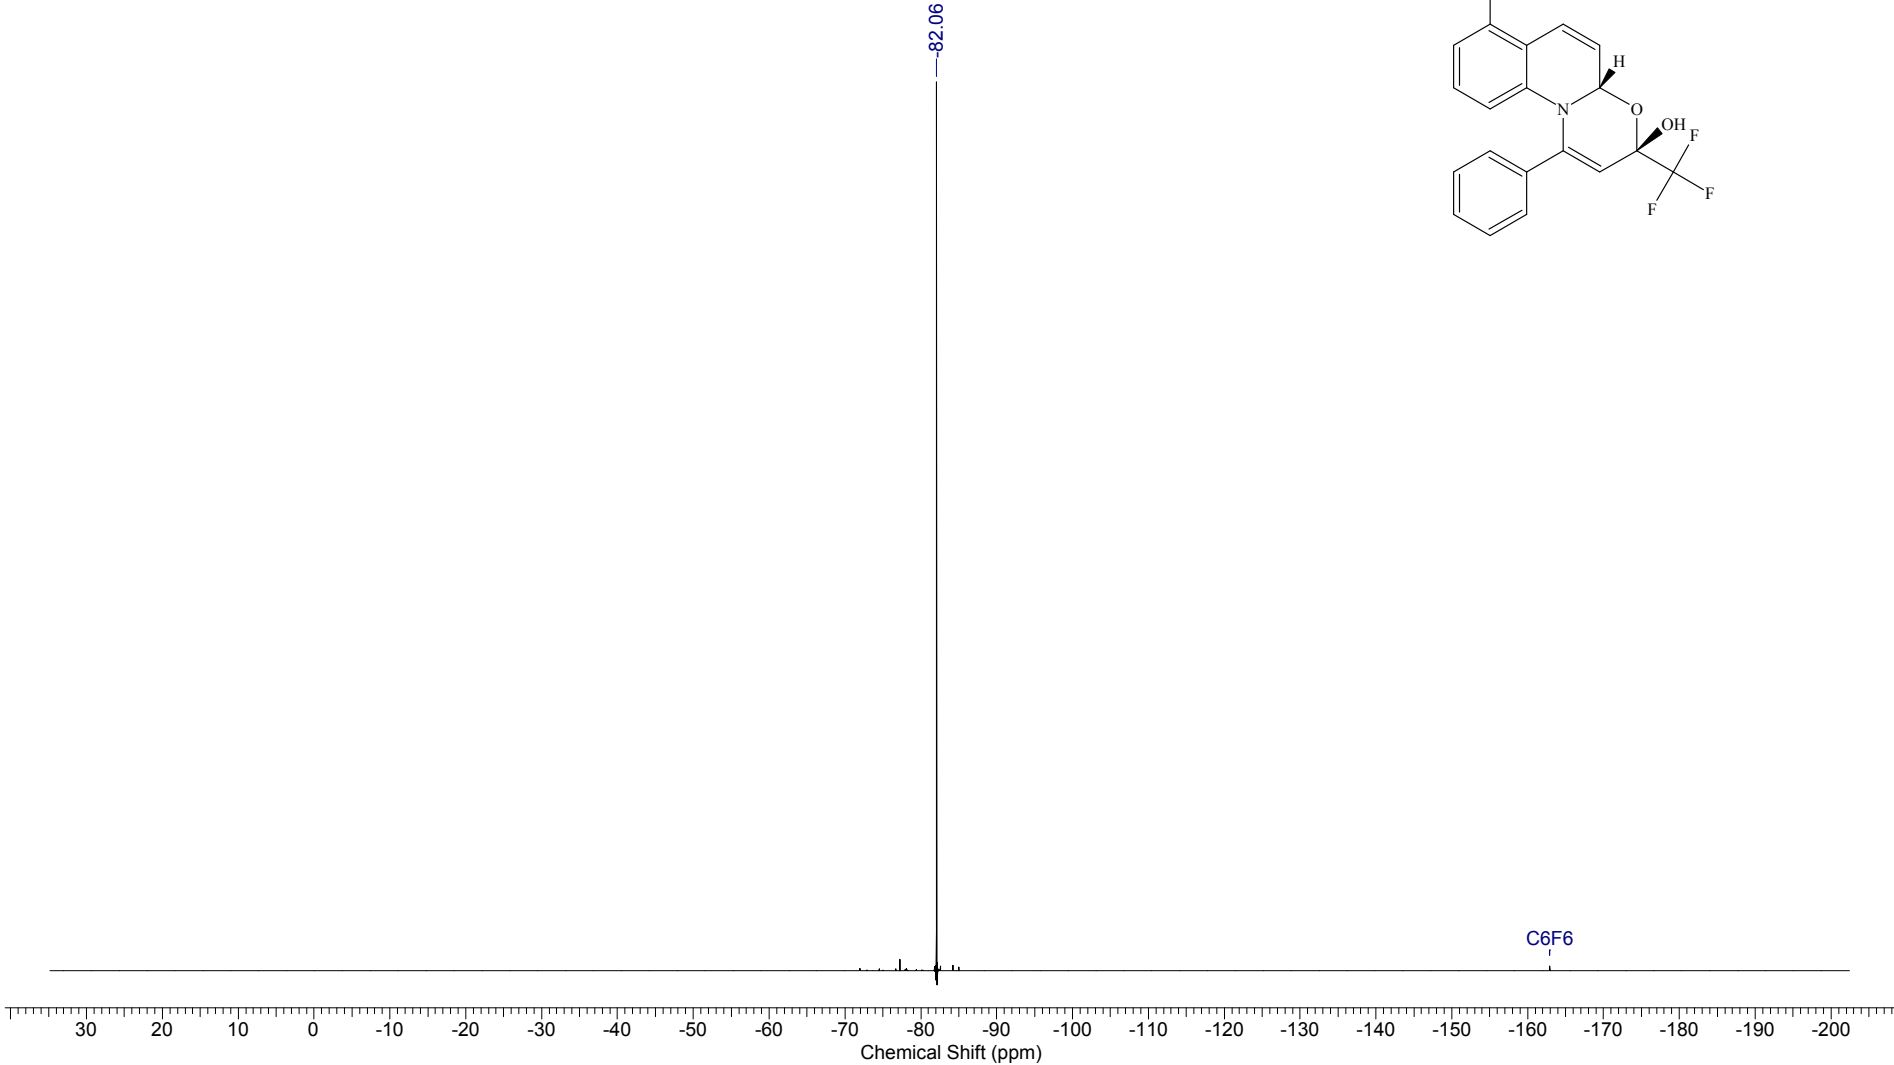

|                               |                |                             |                                                                  |                              |                      |
|-------------------------------|----------------|-----------------------------|------------------------------------------------------------------|------------------------------|----------------------|
| <b>FW</b>                     | 424.2113       | <b>Formula</b>              | C <sub>19</sub> H <sub>13</sub> BrF <sub>3</sub> NO <sub>2</sub> |                              |                      |
| <b>Acquisition Time (sec)</b> | 4.0894         | <b>Comment</b>              | Imported from UXNMR.                                             |                              |                      |
| <b>File Name</b>              | C:\DOCS\OUTPUT | 301\2018\10.1               | éçýáðù\bm181027-2\BM-1392-2f_001001r                             | <b>Date</b>                  | 27 Oct 2018 22:02:24 |
| <b>Nucleus</b>                | 1H             | <b>Number of Transients</b> | 8                                                                | <b>Original Points Count</b> | 32768                |
| <b>Pulse Sequence</b>         | zg30           | <b>Solvent</b>              | ACETONITRILE-D3                                                  |                              |                      |
| <b>Temperature (degree C)</b> | 27.000         | <b>Points Count</b>         | 131072                                                           |                              |                      |
|                               |                | <b>Sweep Width (Hz)</b>     | 8012.82                                                          |                              |                      |

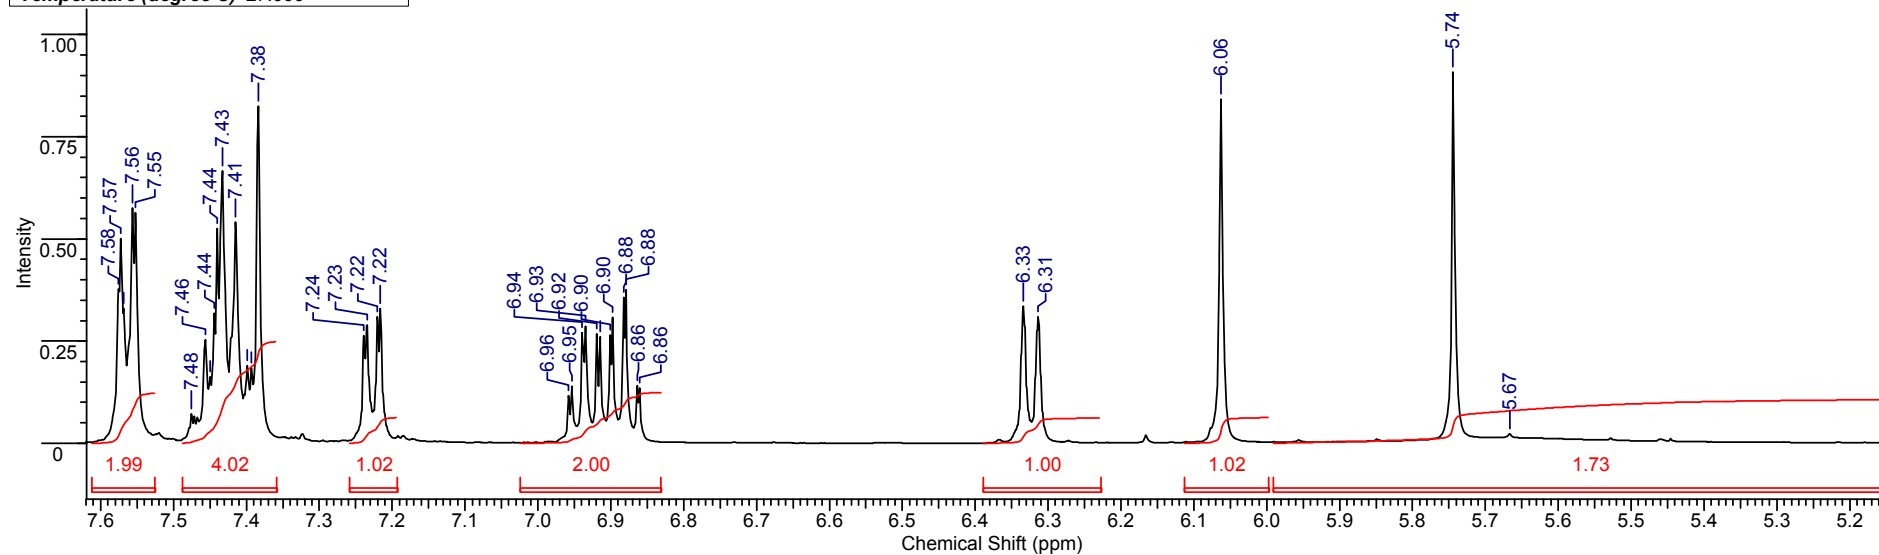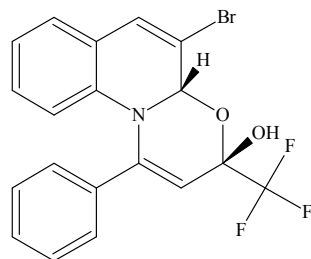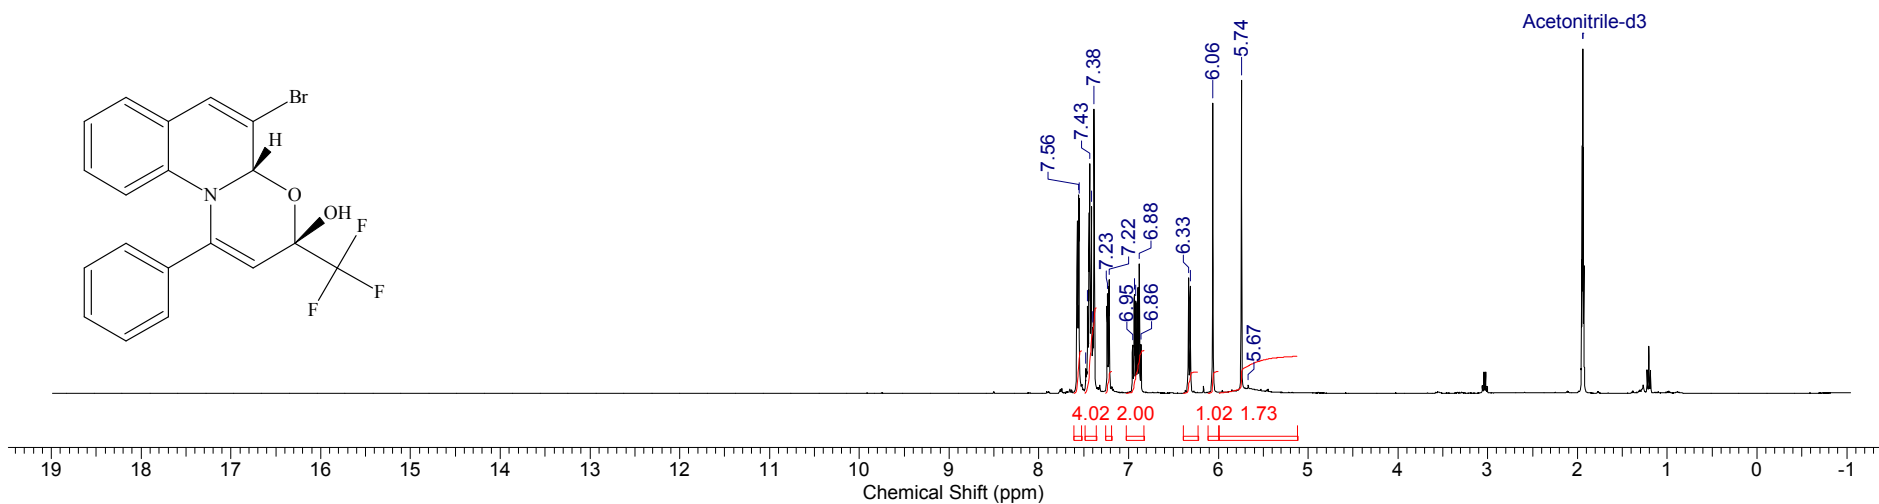

<sup>1</sup>H NMR spectrum of **3p** (400.1 MHz, CD<sub>3</sub>CN)



|           |          |                |                                                                  |
|-----------|----------|----------------|------------------------------------------------------------------|
| <b>FW</b> | 424.2113 | <b>Formula</b> | C <sub>19</sub> H <sub>13</sub> BrF <sub>3</sub> NO <sub>2</sub> |
|-----------|----------|----------------|------------------------------------------------------------------|

|                               |                |                             |                                     |                              |                      |
|-------------------------------|----------------|-----------------------------|-------------------------------------|------------------------------|----------------------|
| <b>Acquisition Time (sec)</b> | 0.6783         | <b>Comment</b>              | Imported from UXNMR.                | <b>Date</b>                  | 27 Oct 2018 22:12:02 |
| <b>File Name</b>              | C:\DOCS\OUTPUT | 301\2018\10.i               | éÿáðü\bm181027-2\BM-1392-2f_002001r | <b>Frequency (MHz)</b>       | 100.61               |
| <b>Nucleus</b>                | 13C            | <b>Number of Transients</b> | 240                                 | <b>Original Points Count</b> | 16384                |
| <b>Pulse Sequence</b>         | zgpg30         | <b>Solvent</b>              | ACETONITRILE-D3                     | <b>Points Count</b>          | 131072               |
| <b>Temperature (degree C)</b> | 27.000         |                             |                                     | <b>Sweep Width (Hz)</b>      | 24154.59             |

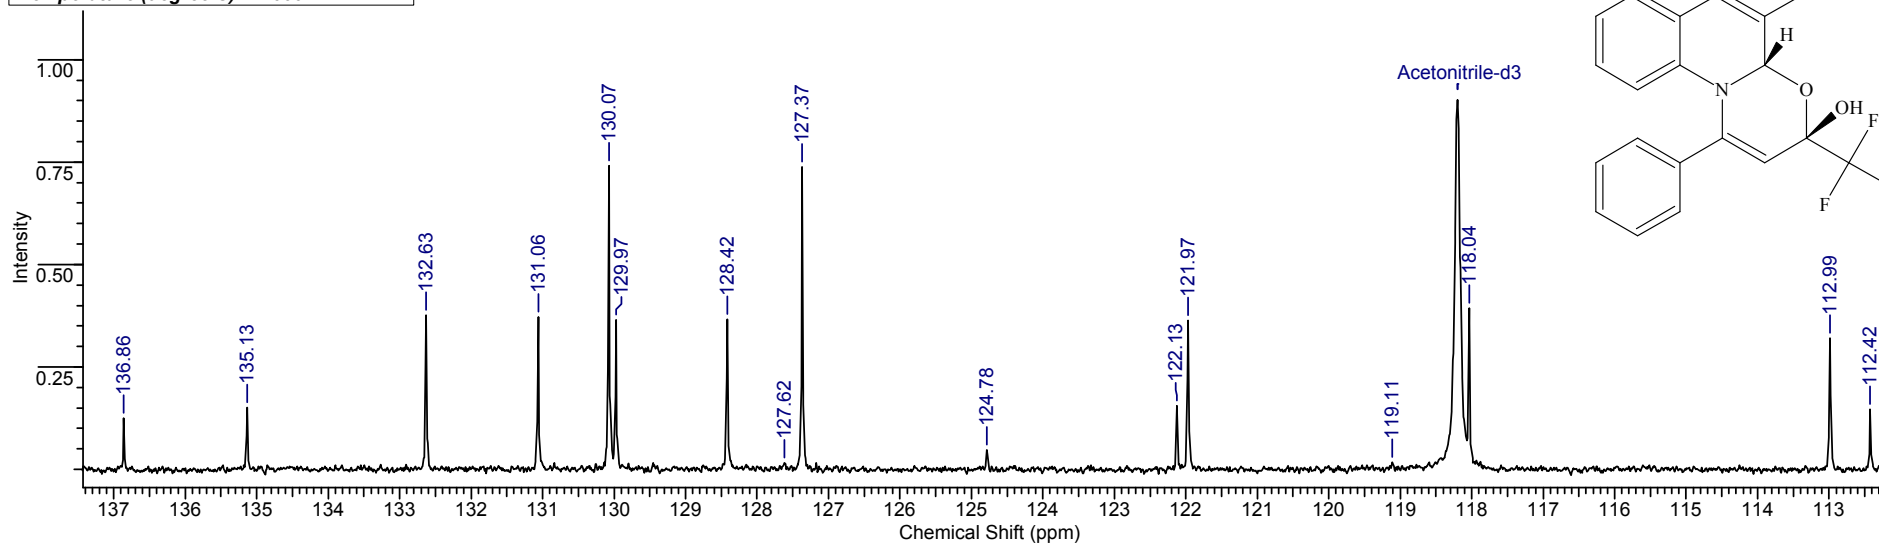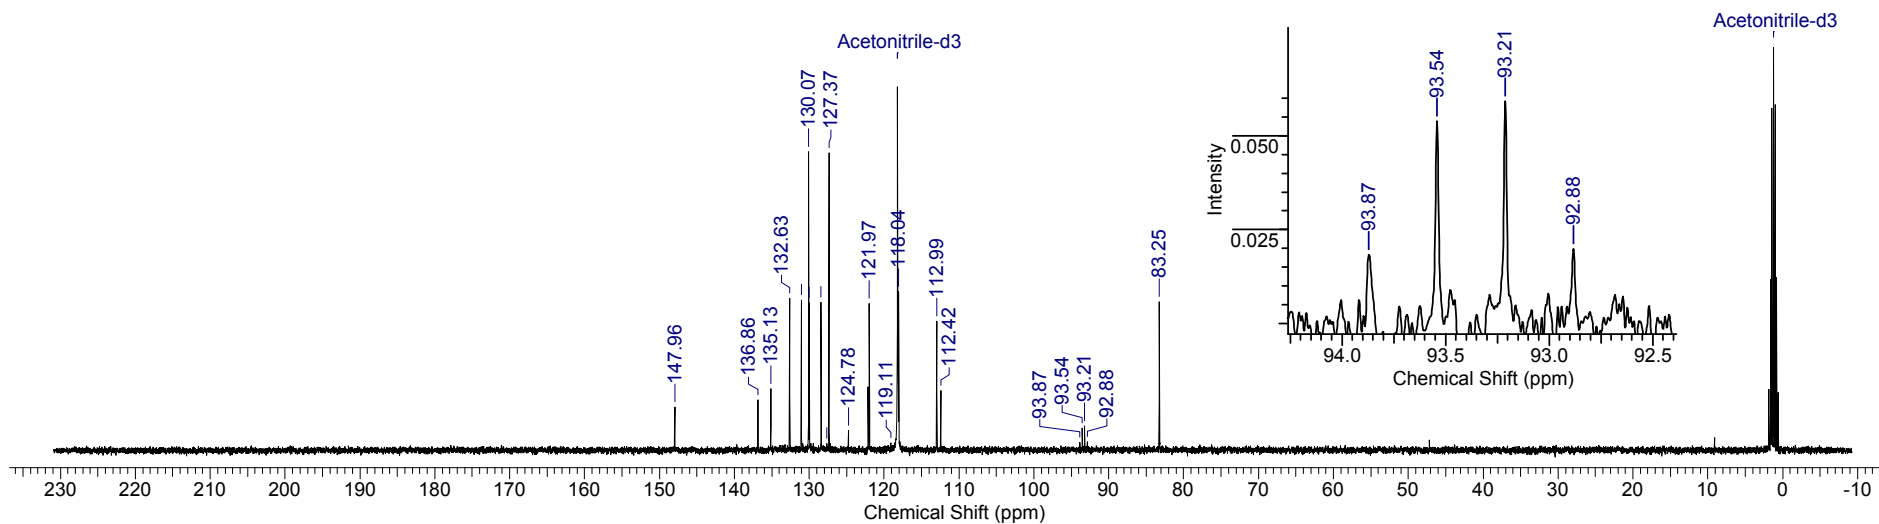

<sup>13</sup>C NMR spectrum of **3p** (100.6 MHz, CD<sub>3</sub>CN)

|                                      |                                                                                 |                                                                                       |                                     |
|--------------------------------------|---------------------------------------------------------------------------------|---------------------------------------------------------------------------------------|-------------------------------------|
| <b>FW</b> 424.2113                   | <b>Formula</b> C <sub>19</sub> H <sub>13</sub> BrF <sub>3</sub> NO <sub>2</sub> |                                                                                       |                                     |
| <b>Acquisition Time (sec)</b> 2.0000 | <b>Date</b> Oct 29 2018                                                         | <b>File Name</b> C:\DOCS\OUTPUT_301\F19\2018.10.29\BM-1392-2f_20181029_01\FLUORINE_01 |                                     |
| <b>Frequency (MHz)</b> 376.31        | <b>Nucleus</b> 19F                                                              | <b>Number of Transients</b> 16                                                        | <b>Original Points Count</b> 178571 |
| <b>Points Count</b> 262144           | <b>Pulse Sequence</b> s2pul                                                     | <b>Solvent</b> ACETONITRILE-D3                                                        |                                     |
| <b>Sweep Width (Hz)</b> 89285.71     | <b>Temperature (degree C)</b> 22.000                                            |                                                                                       |                                     |

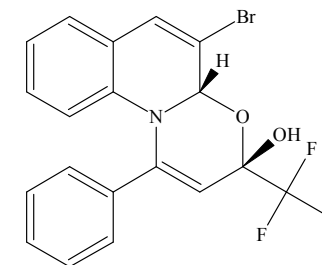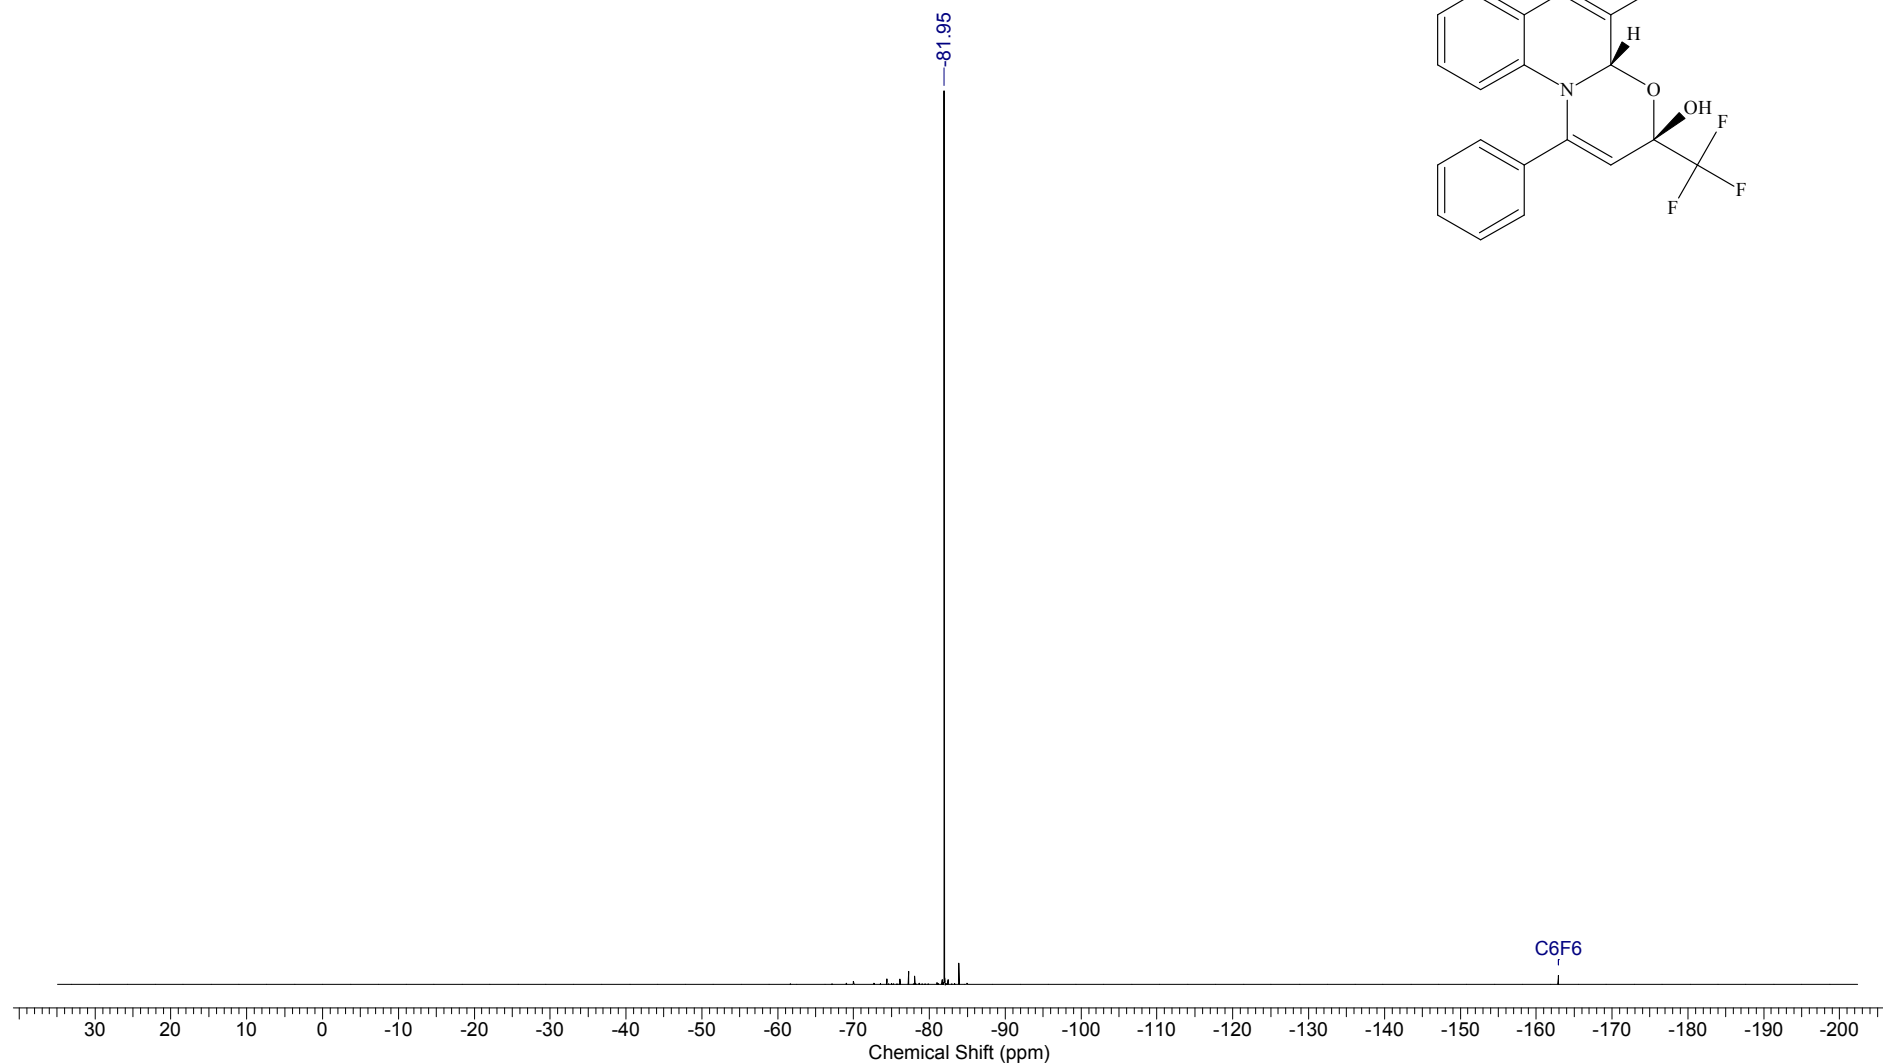

<sup>19</sup>F NMR spectrum of **3p** (376.5 MHz, CD<sub>3</sub>CN)

S50

FW 346.3033      Formula C<sub>18</sub>H<sub>13</sub>F<sub>3</sub>N<sub>2</sub>O<sub>2</sub>

|                        |                                                       |                      |                      |                       |                      |
|------------------------|-------------------------------------------------------|----------------------|----------------------|-----------------------|----------------------|
| Acquisition Time (sec) | 2.5559                                                | Comment              | Imported from UXNMR. | Date                  | 17 Oct 2018 17:28:12 |
| File Name              | C:\DOCS\OUTPUT_301\2018\10.i\001001\BM-1394.H_001001r |                      |                      | Frequency (MHz)       | 400.13               |
| Nucleus                | 1H                                                    | Number of Transients | 6                    | Original Points Count | 16384                |
| Pulse Sequence         | zg30                                                  | Solvent              | ACETONITRILE-D3      | Points Count          | 65536                |
| Temperature (degree C) | 27.000                                                |                      |                      | Sweep Width (Hz)      | 6410.26              |

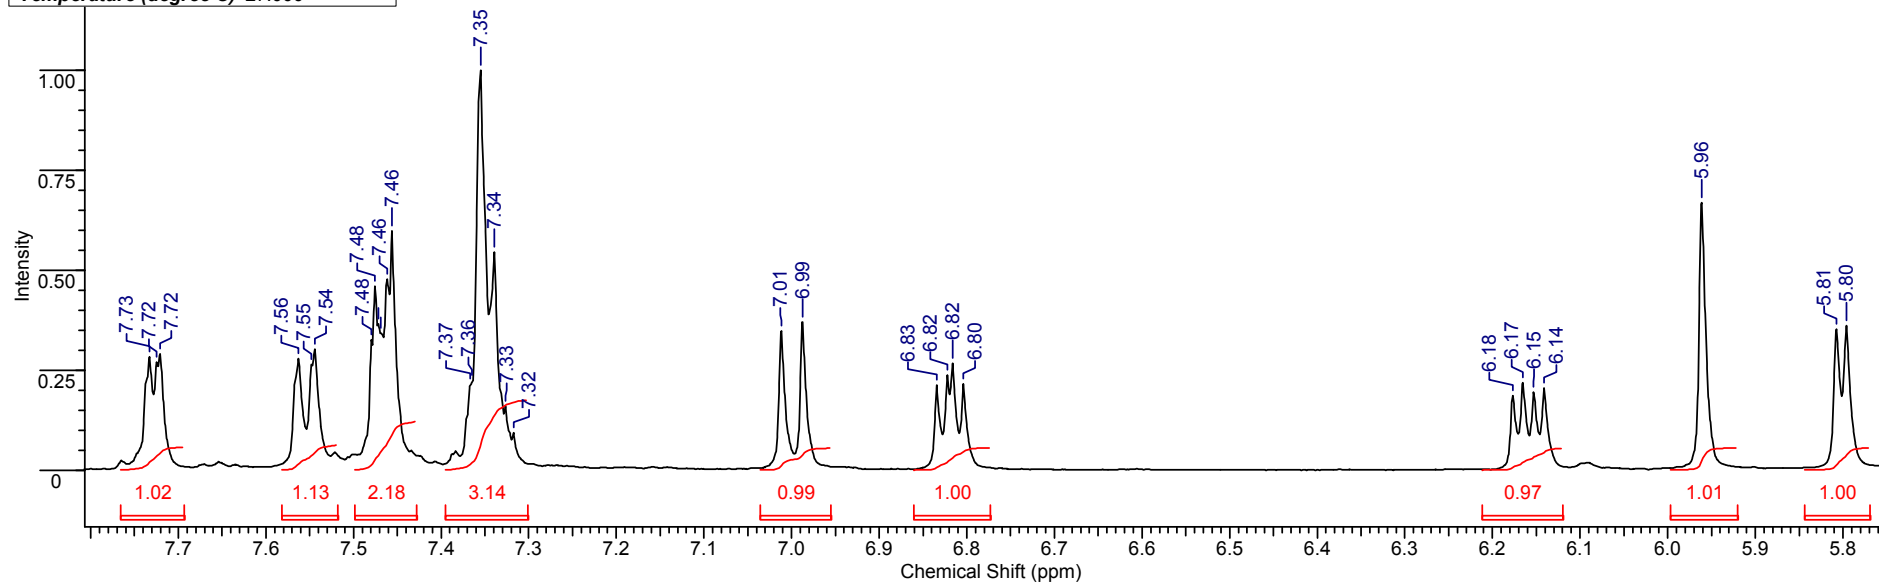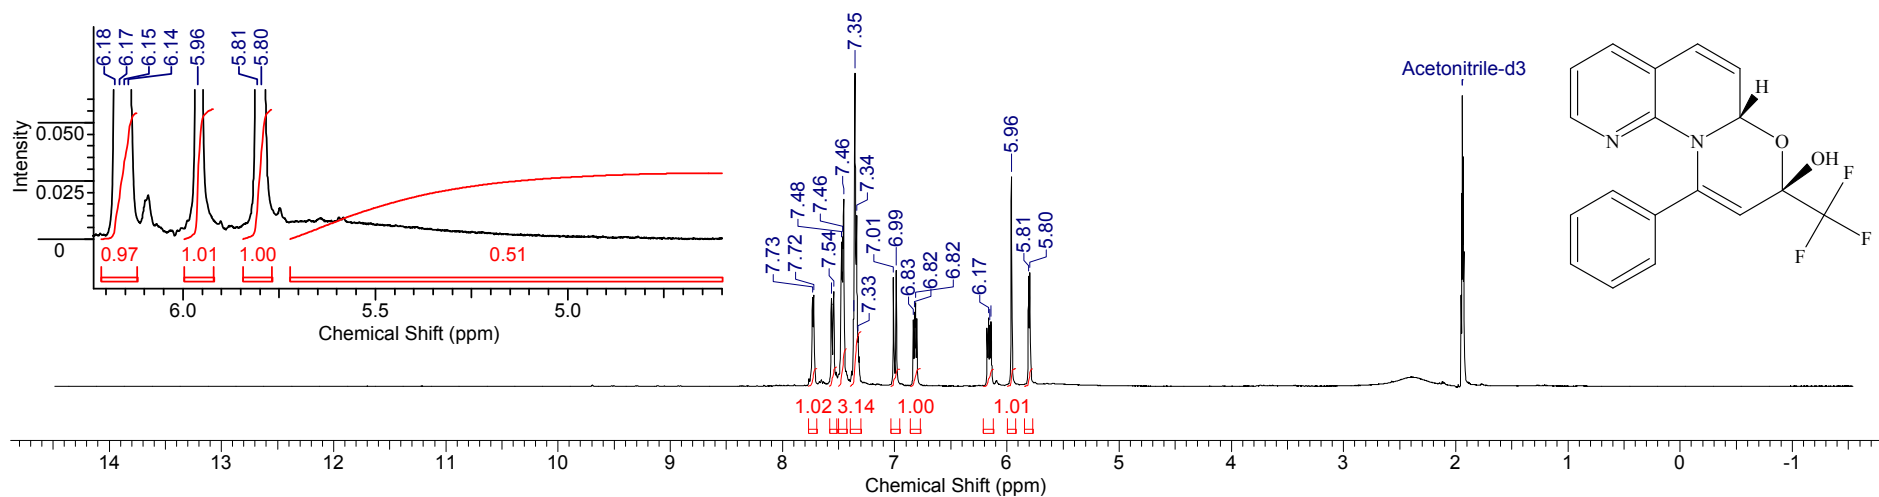

<sup>1</sup>H NMR spectrum of **3q** (400.1 MHz, CD<sub>3</sub>CN)

|           |          |                |                                                                              |
|-----------|----------|----------------|------------------------------------------------------------------------------|
| <b>FW</b> | 346.3033 | <b>Formula</b> | C <sub>18</sub> H <sub>13</sub> F <sub>3</sub> N <sub>2</sub> O <sub>2</sub> |
|-----------|----------|----------------|------------------------------------------------------------------------------|

|                               |           |                               |                 |                             |                                                                     |                              |        |
|-------------------------------|-----------|-------------------------------|-----------------|-----------------------------|---------------------------------------------------------------------|------------------------------|--------|
| <b>Acquisition Time (sec)</b> | 2.3069    | <b>Date</b>                   | Oct 18 2018     | <b>File Name</b>            | C:\DOCS\OUTPUT_301\F19\2018.10.18\BM-1394-F_20181018_01\FLUORINE_01 |                              |        |
| <b>Frequency (MHz)</b>        | 376.32    | <b>Nucleus</b>                | <sup>19</sup> F | <b>Number of Transients</b> | 8                                                                   | <b>Original Points Count</b> | 262144 |
| <b>Points Count</b>           | 262144    | <b>Pulse Sequence</b>         | s2pul           | <b>Solvent</b>              | ACETONITRILE-D3                                                     |                              |        |
| <b>Sweep Width (Hz)</b>       | 113636.37 | <b>Temperature (degree C)</b> | 22.000          |                             |                                                                     |                              |        |

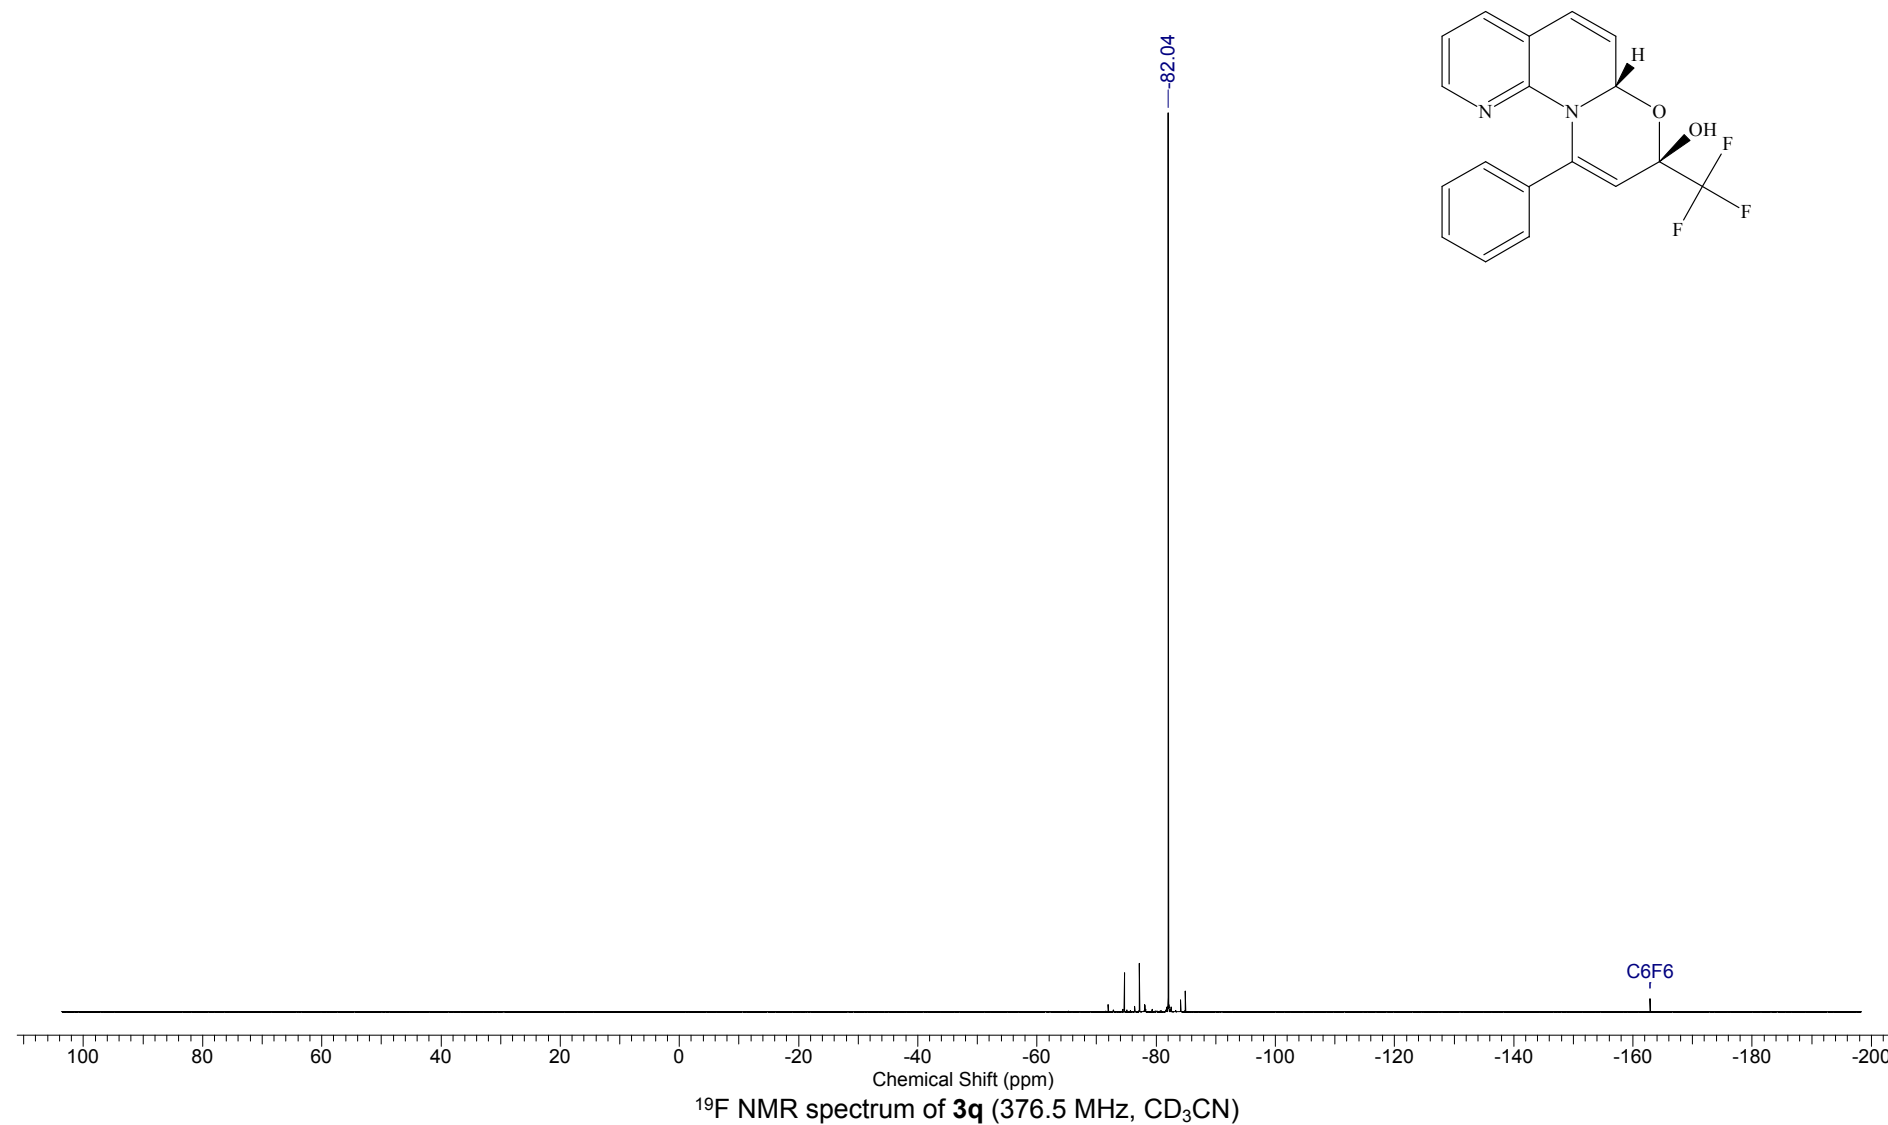

S52

|                               |                                           |                               |                      |                       |                      |                             |                |              |
|-------------------------------|-------------------------------------------|-------------------------------|----------------------|-----------------------|----------------------|-----------------------------|----------------|--------------|
| <b>Acquisition Time (sec)</b> | 4.0894                                    | <b>Comment</b>                | Imported from UXMNR. | <b>Date</b>           | 06 Jun 2019 19:17:06 |                             |                |              |
| <b>File Name</b>              | I:\SPEC_2019_H_C\06.epi\BM-1604-a_001001r | <b>Frequency (MHz)</b>        | 400.13               | <b>Nucleus</b>        | 1H                   | <b>Number of Transients</b> | 8              |              |
| <b>Original Points Count</b>  | 32768                                     | <b>Points Count</b>           | 131072               | <b>Pulse Sequence</b> | zg30                 |                             | <b>Solvent</b> | CHLOROFORM-D |
| <b>Sweep Width (Hz)</b>       | 8012.82                                   | <b>Temperature (degree C)</b> | 27.000               |                       |                      |                             |                |              |

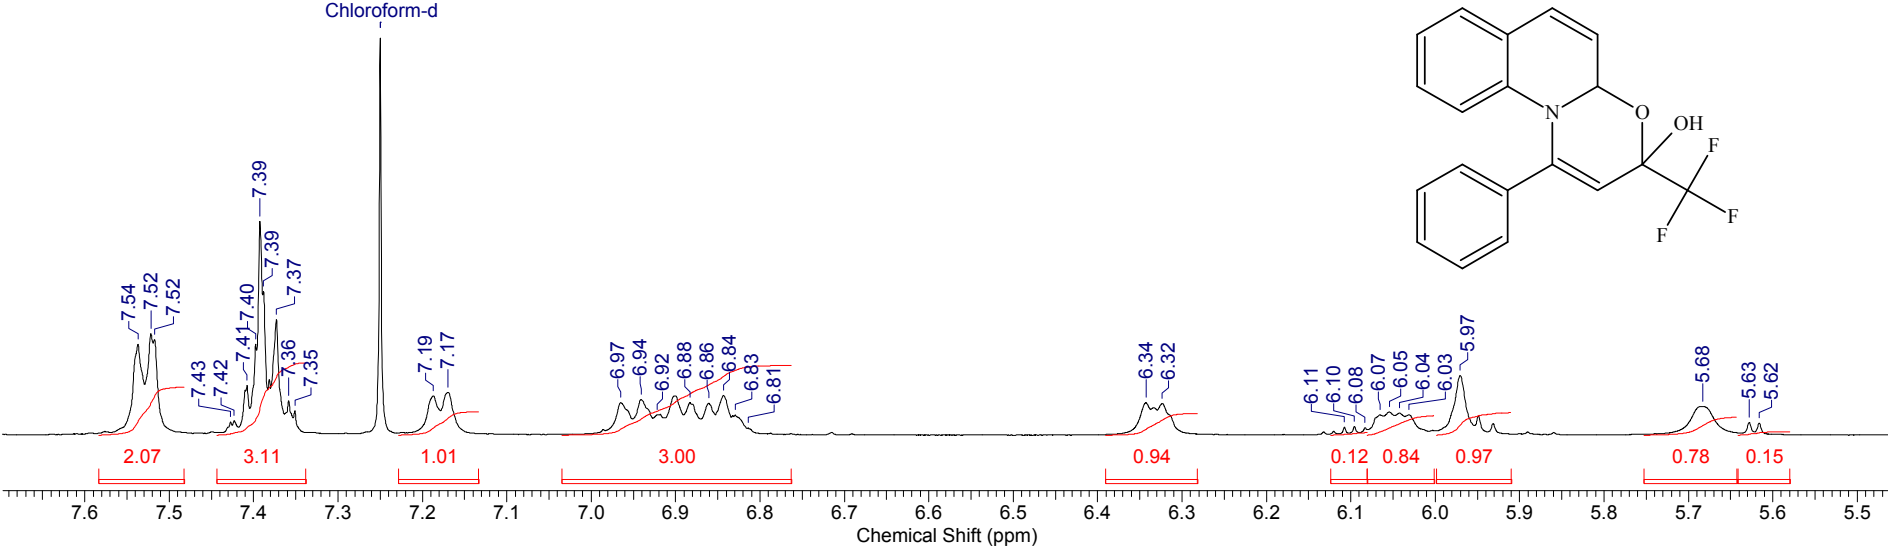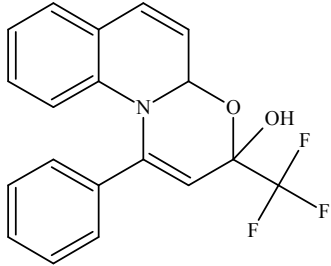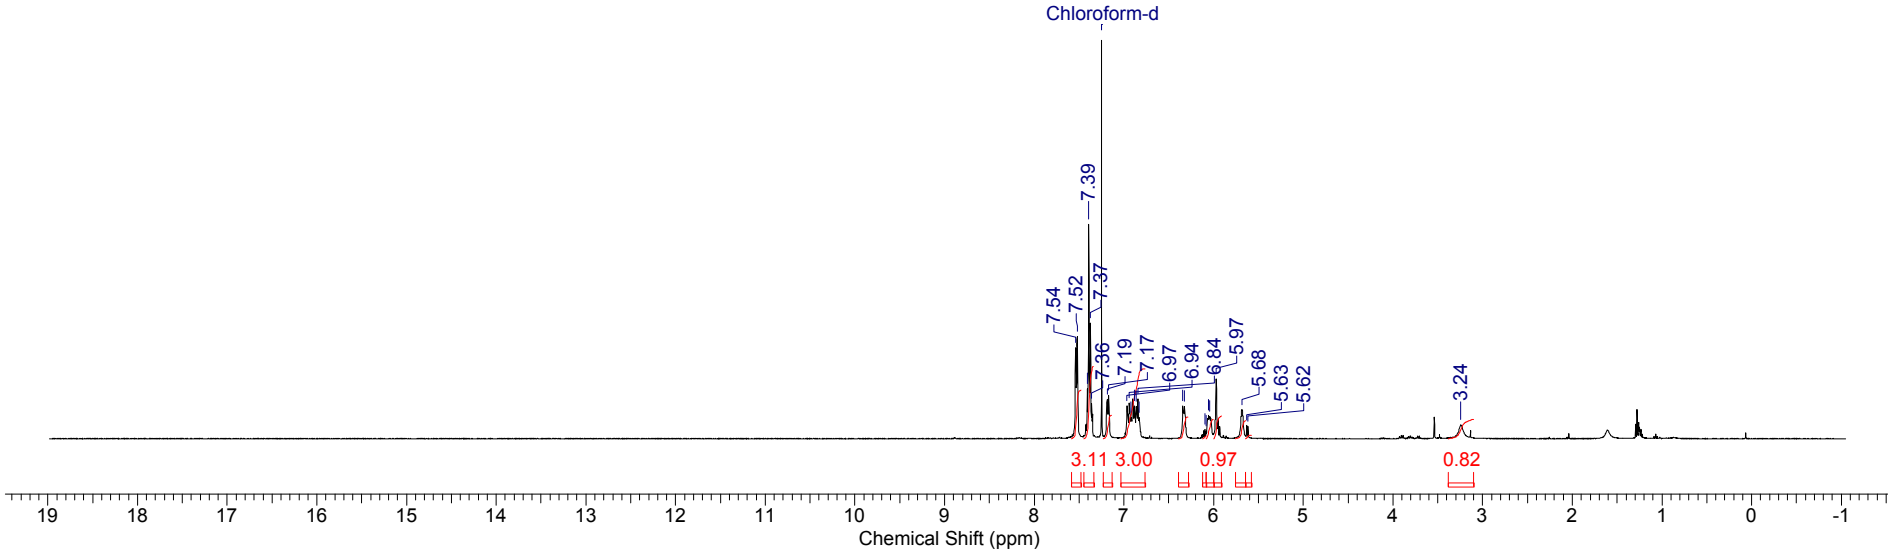

<sup>1</sup>H NMR spectrum of diastereomeric mixture of **3a** and **3a'** (400.1 MHz, CDCl<sub>3</sub>)

|                               |          |                               |            |                             |                                                                     |                              |       |
|-------------------------------|----------|-------------------------------|------------|-----------------------------|---------------------------------------------------------------------|------------------------------|-------|
| <b>Acquisition Time (sec)</b> | 1.0000   | <b>Date</b>                   | Jun 7 2019 | <b>File Name</b>            | C:\DOCS\OUTPUT_301\F19\2019.06.07\BM-1604-a_20190607_01\FLUORINE_01 |                              |       |
| <b>Frequency (MHz)</b>        | 376.31   | <b>Nucleus</b>                | 19F        | <b>Number of Transients</b> | 16                                                                  | <b>Original Points Count</b> | 89286 |
| <b>Points Count</b>           | 131072   | <b>Pulse Sequence</b>         | s2pul      | <b>Solvent</b>              | CHLOROFORM-D                                                        |                              |       |
| <b>Sweep Width (Hz)</b>       | 89285.71 | <b>Temperature (degree C)</b> | 21.000     |                             |                                                                     |                              |       |

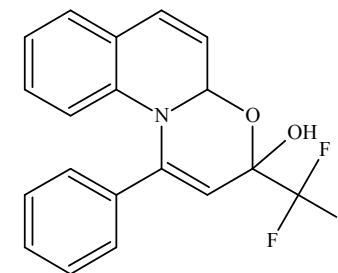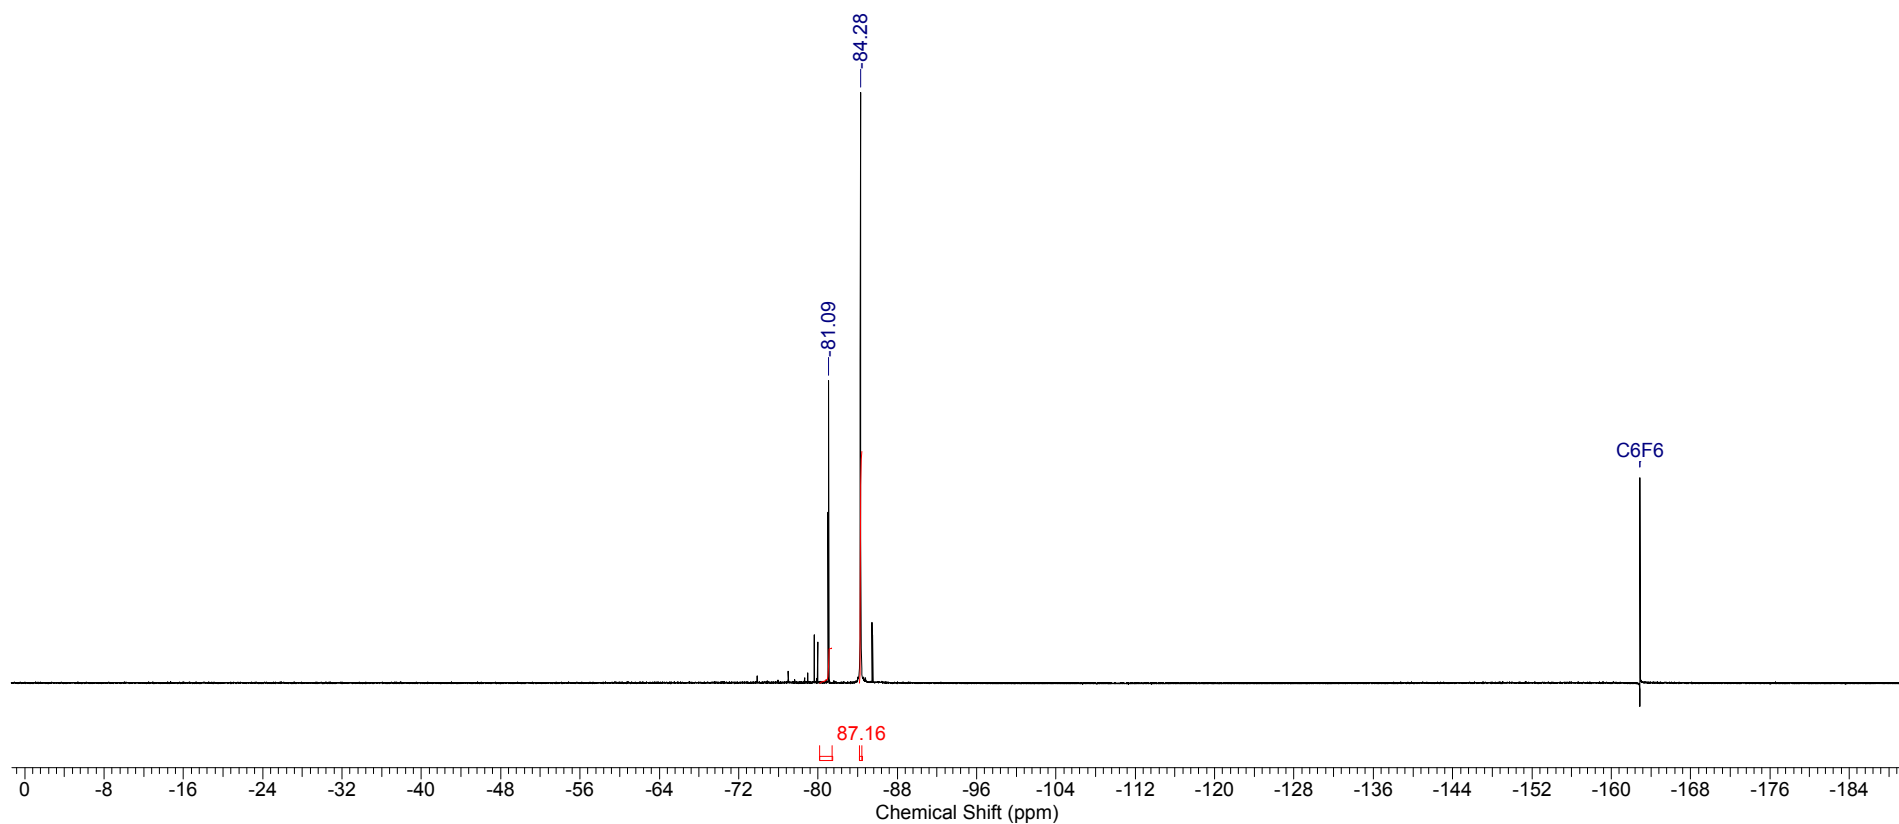

<sup>19</sup>F NMR spectrum of diastereomeric mixture of **3a** and **3a'** (376.5 MHz, CDCl<sub>3</sub>)

|                               |                                                |                              |                      |                               |                      |
|-------------------------------|------------------------------------------------|------------------------------|----------------------|-------------------------------|----------------------|
| <b>Acquisition Time (sec)</b> | 4.0894                                         | <b>Comment</b>               | Imported from UXNMR. | <b>Date</b>                   | 31 May 2019 15:12:08 |
| <b>File Name</b>              | C:\DOCS\OUTPUT_301\2019\05\1\BM-1588.H_001001r | <b>Frequency (MHz)</b>       | 400.13               | <b>Nucleus</b>                | 1H                   |
| <b>Number of Transients</b>   | 4                                              | <b>Original Points Count</b> | 32768                | <b>Points Count</b>           | 131072               |
| <b>Solvent</b>                | ACETONITRILE-D3                                | <b>Sweep Width (Hz)</b>      | 8012.82              | <b>Pulse Sequence</b>         | zg30                 |
|                               |                                                |                              |                      | <b>Temperature (degree C)</b> | 27.000               |

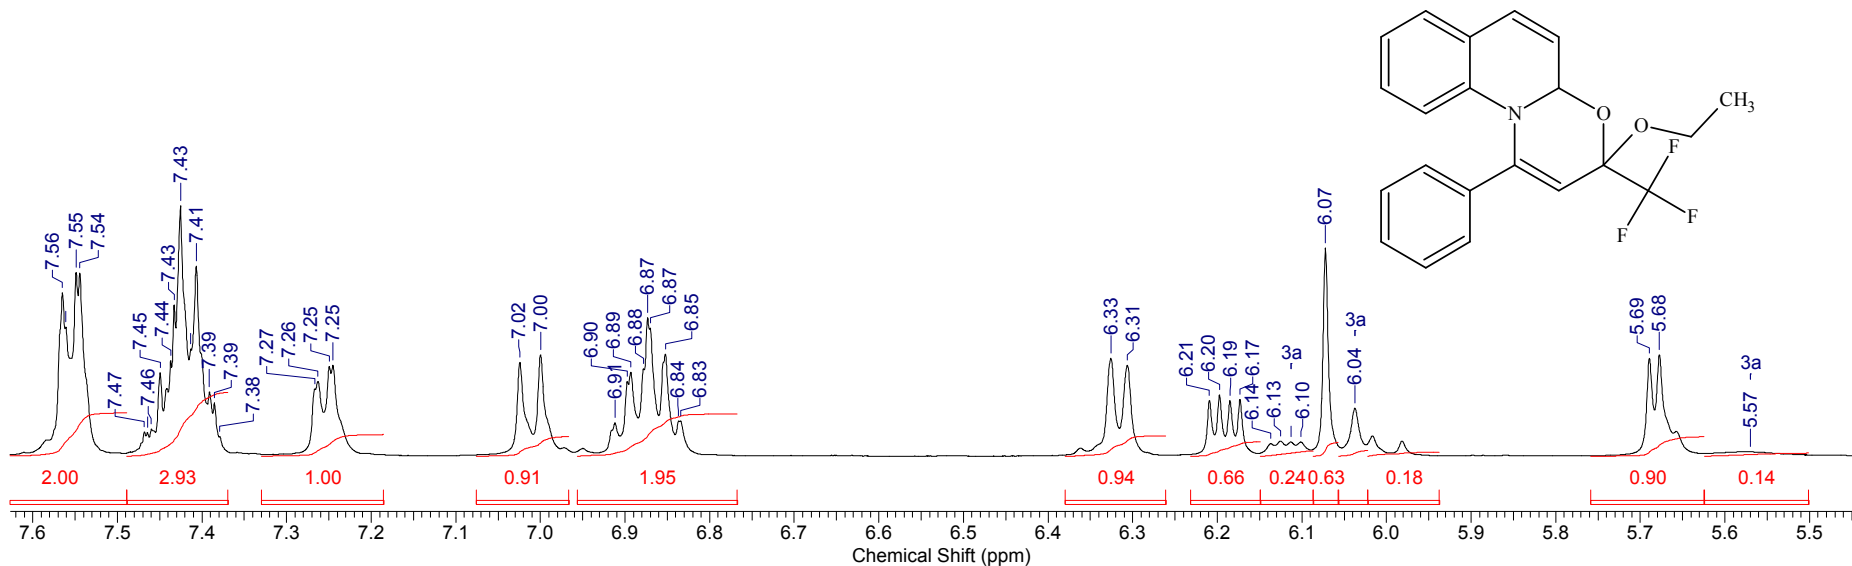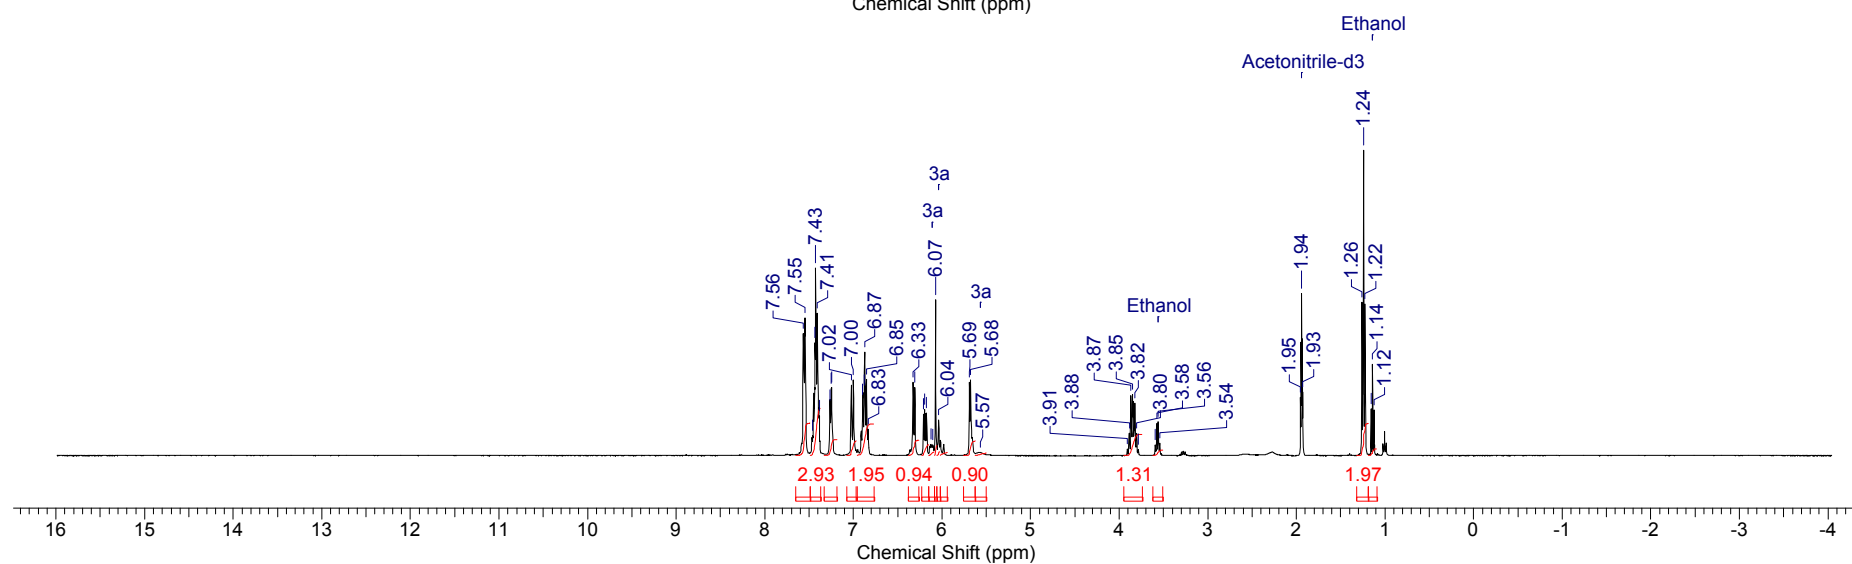

<sup>1</sup>H NMR spectrum of **4** (400.1 MHz, CD<sub>3</sub>CN). Signals of **3a** are the result of hydrolysis of **4** during preparation and storing of the NMR sample.

|                               |          |                               |            |                             |                                                           |                              |       |
|-------------------------------|----------|-------------------------------|------------|-----------------------------|-----------------------------------------------------------|------------------------------|-------|
| <b>Acquisition Time (sec)</b> | 1.0000   | <b>Date</b>                   | Jun 3 2019 | <b>File Name</b>            | I:\SPEC_F_2019\2019.06.03\BM-1588_20190603_01\FLUORINE_01 |                              |       |
| <b>Frequency (MHz)</b>        | 376.31   | <b>Nucleus</b>                | 19F        | <b>Number of Transients</b> | 16                                                        | <b>Original Points Count</b> | 89286 |
| <b>Points Count</b>           | 131072   | <b>Pulse Sequence</b>         | s2pul      | <b>Solvent</b>              | CHLOROFORM-D                                              |                              |       |
| <b>Sweep Width (Hz)</b>       | 89285.71 | <b>Temperature (degree C)</b> | 21.000     |                             |                                                           |                              |       |

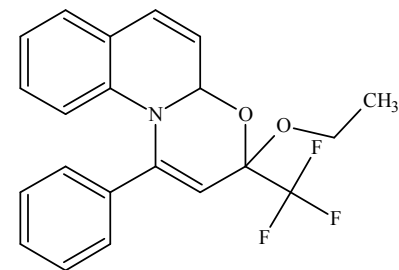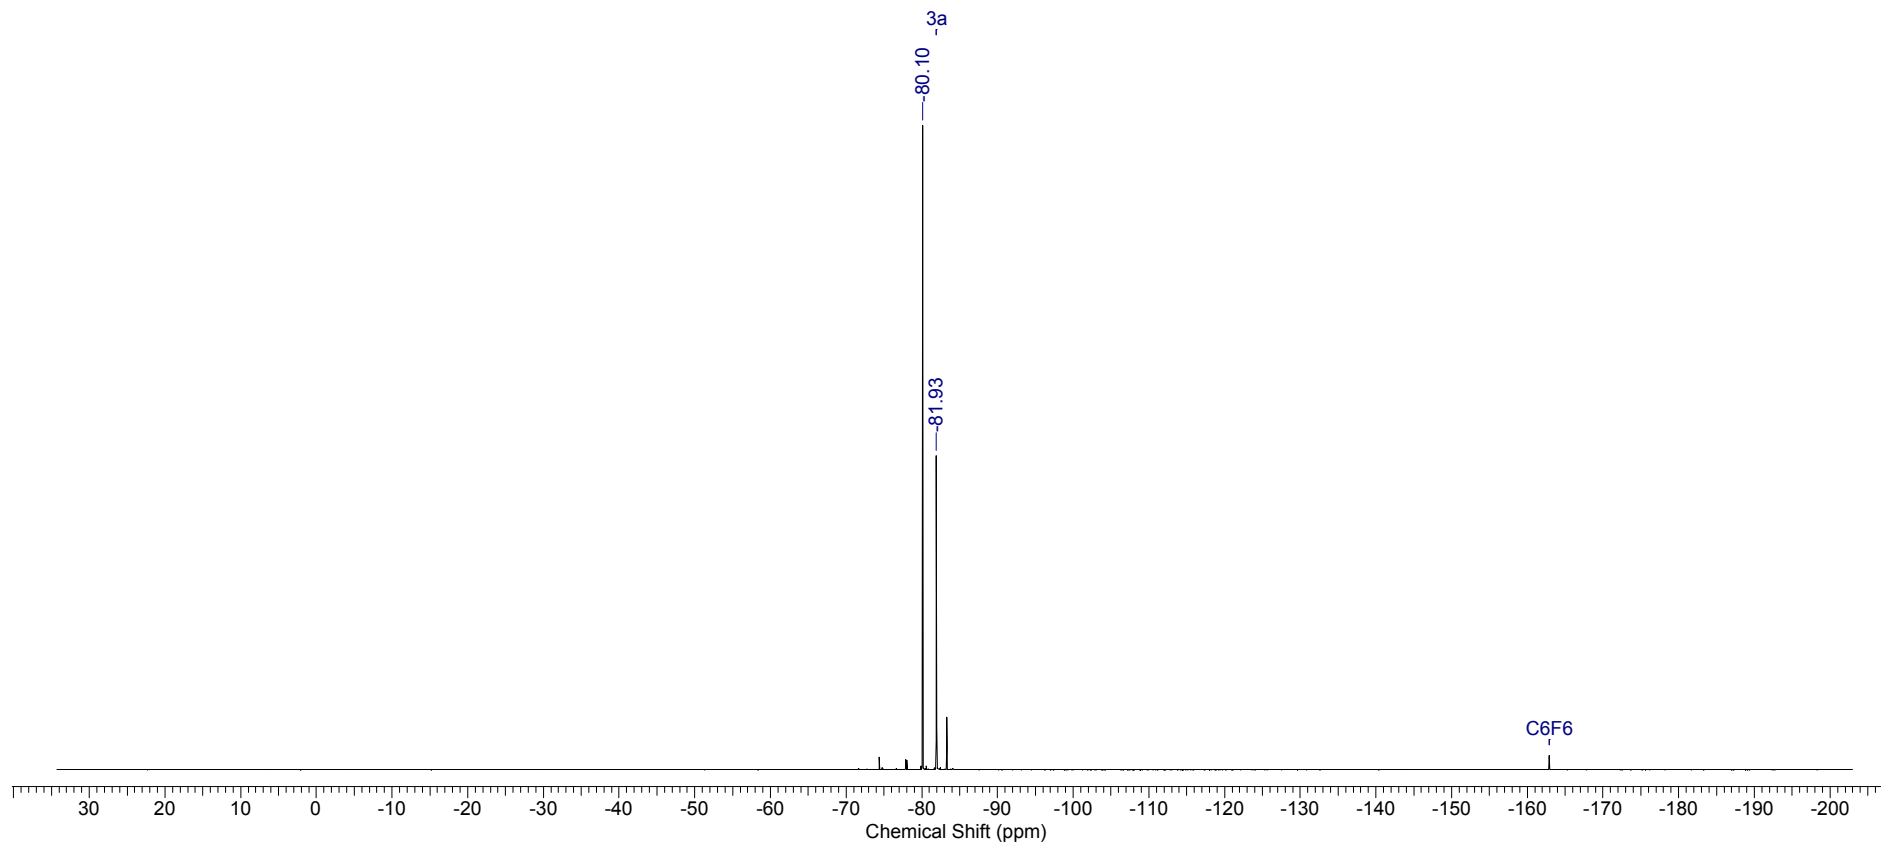

<sup>19</sup>F NMR spectrum of **4** (376.5 MHz, CD<sub>3</sub>CN). Signals of **3a** are the result of hydrolysis of **4** during preparation and storing of the NMR sample.



|                               |                                                  |                              |                      |                               |                      |
|-------------------------------|--------------------------------------------------|------------------------------|----------------------|-------------------------------|----------------------|
| <b>Acquisition Time (sec)</b> | 0.6783                                           | <b>Comment</b>               | Imported from UXMNR. | <b>Date</b>                   | 31 May 2019 15:20:20 |
| <b>File Name</b>              | C:\DOCS\OUTPUT_301\2019\05\1\æ\BM-1588.C_002001r | <b>Frequency (MHz)</b>       | 100.61               | <b>Nucleus</b>                | <sup>13</sup> C      |
| <b>Number of Transients</b>   | 161                                              | <b>Original Points Count</b> | 16384                | <b>Points Count</b>           | 131072               |
| <b>Solvent</b>                | CHLOROFORM-D                                     | <b>Sweep Width (Hz)</b>      | 24154.59             | <b>Pulse Sequence</b>         | zgpg30               |
|                               |                                                  |                              |                      | <b>Temperature (degree C)</b> | 27.000               |

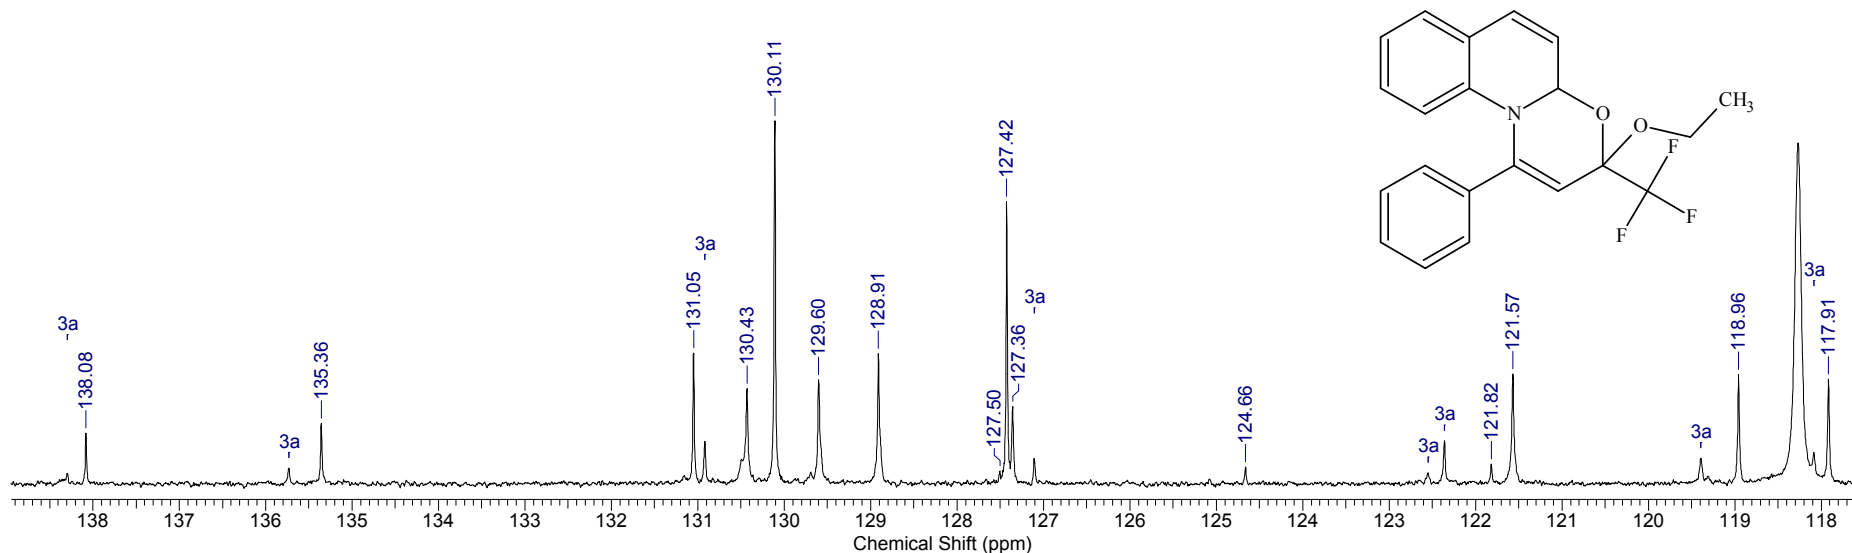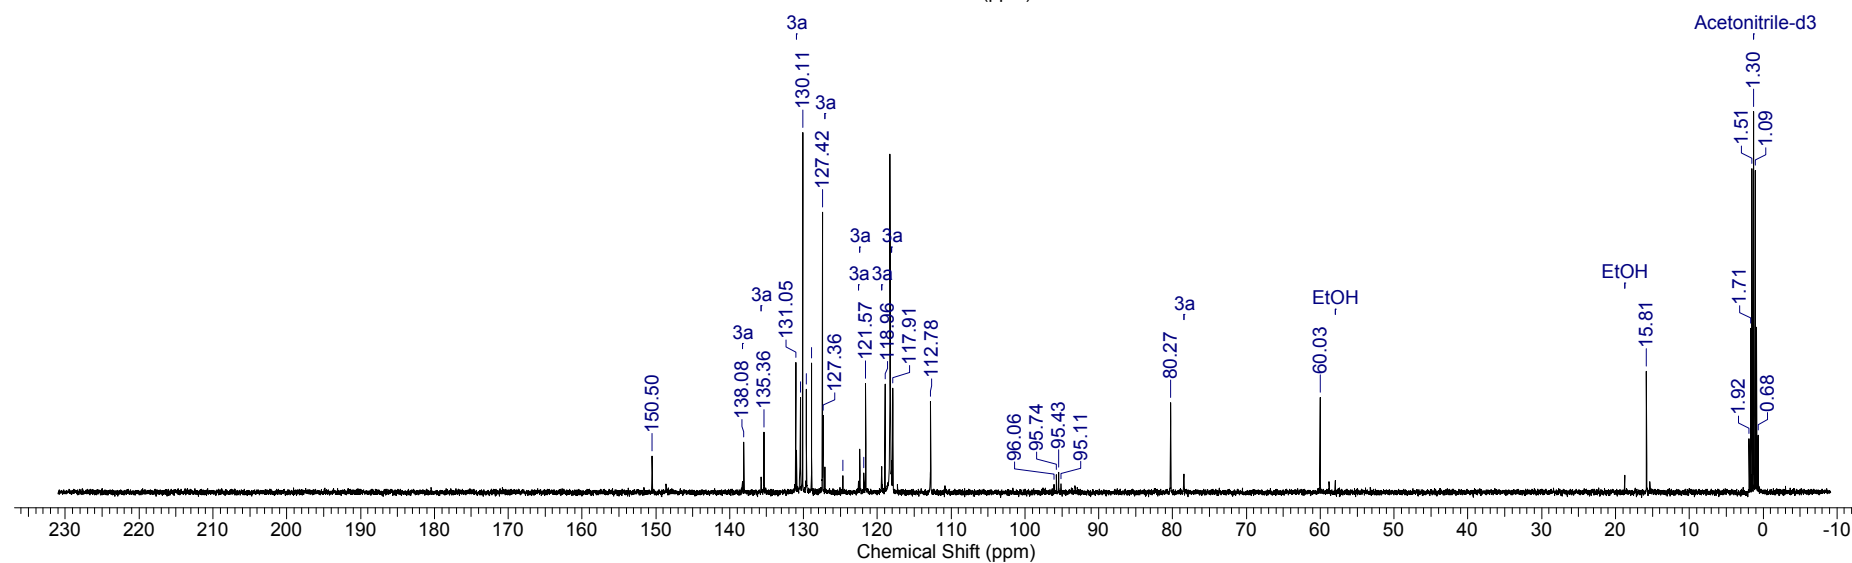

<sup>13</sup>C NMR spectrum of **4** (100.6 MHz, CD<sub>3</sub>CN). Signals of **3a** are the result of hydrolysis of **4** during preparation and storing of the NMR sample.

|                               |                                                    |                             |                      |                              |                      |
|-------------------------------|----------------------------------------------------|-----------------------------|----------------------|------------------------------|----------------------|
| <b>Acquisition Time (sec)</b> | 4.0894                                             | <b>Comment</b>              | Imported from UXMNR. | <b>Date</b>                  | 05 Jun 2019 17:26:50 |
| <b>File Name</b>              | C:\DOCS\OUTPUT_301\2019\06.epi\BM-1591-a.H_001001r | <b>Number of Transients</b> | 4                    | <b>Original Points Count</b> | 32768                |
| <b>Nucleus</b>                | <sup>1</sup> H                                     | <b>Solvent</b>              | ACETONITRILE-D3      | <b>Frequency (MHz)</b>       | 400.13               |
| <b>Pulse Sequence</b>         | zg30                                               |                             |                      | <b>Points Count</b>          | 131072               |
| <b>Temperature (degree C)</b> | 27.000                                             |                             |                      | <b>Sweep Width (Hz)</b>      | 8012.82              |

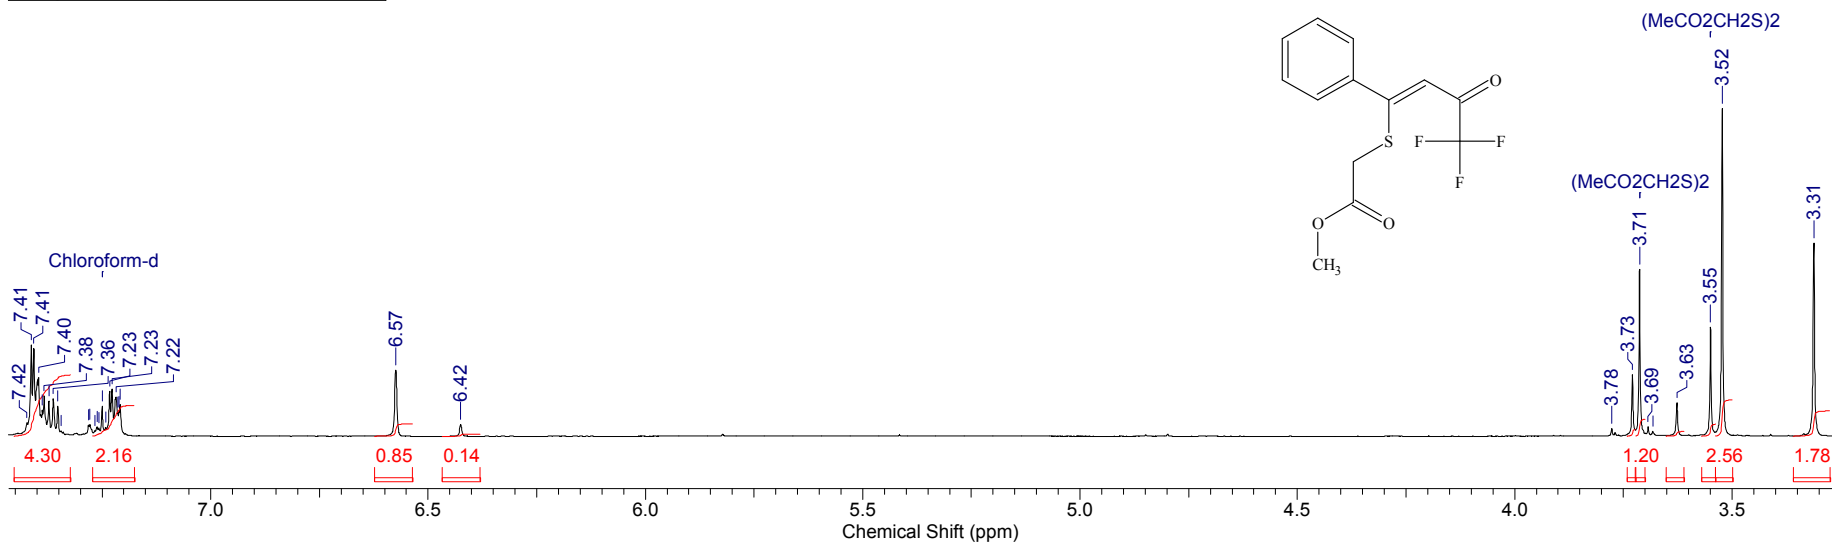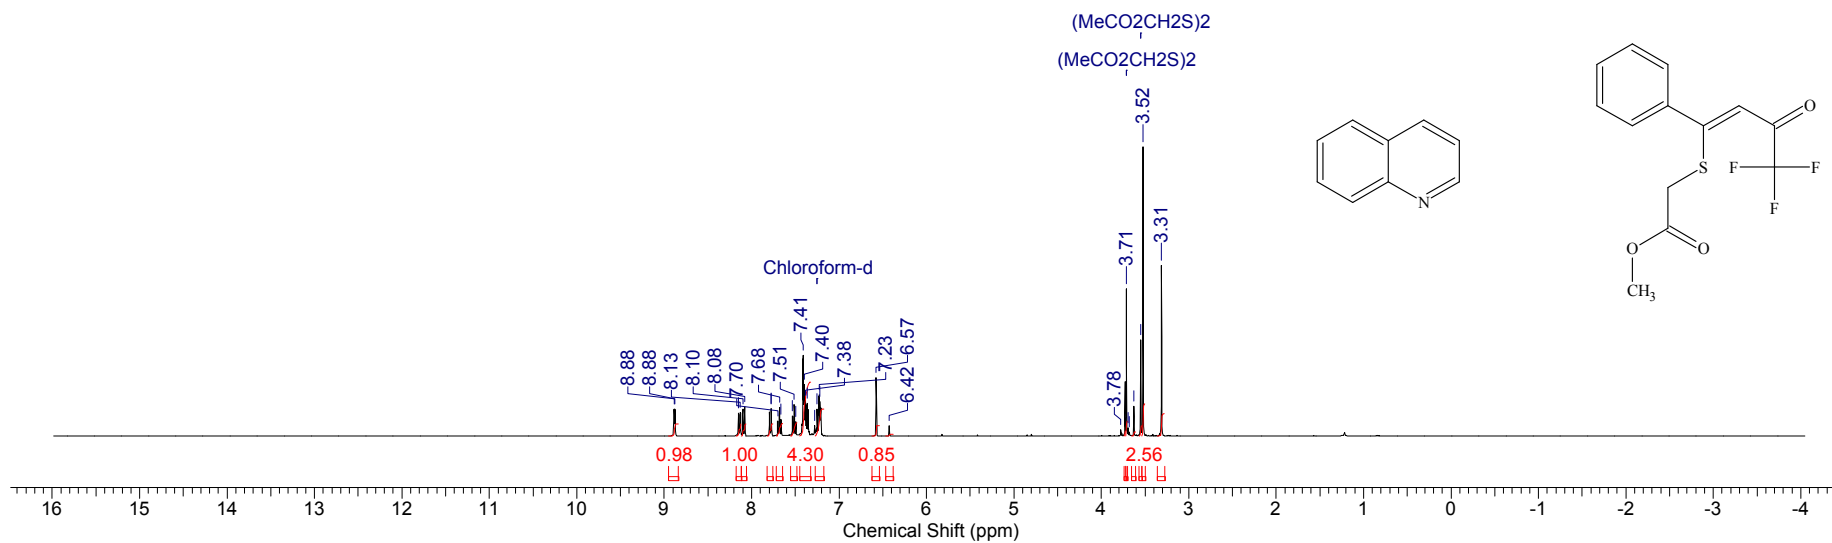

<sup>1</sup>H NMR spectrum of mixture of quinoline and methyl 2-((4,4,4-trifluoro-3-oxo-1-phenylbut-1-en-1-yl)thio)acetate **5** (400.1 MHz, CDCl<sub>3</sub>). The region with signals of compound **5** are highlighted.

|                               |                                                    |                              |                      |                         |                      |
|-------------------------------|----------------------------------------------------|------------------------------|----------------------|-------------------------|----------------------|
| <b>Acquisition Time (sec)</b> | 4.0894                                             | <b>Comment</b>               | Imported from UXNMR. | <b>Date</b>             | 05 Jun 2019 17:26:50 |
| <b>File Name</b>              | C:\DOCS\OUTPUT_301\2019\06.epi\BM-1591-a.H_001001r | <b>Number of Transients</b>  | 4                    | <b>Frequency (MHz)</b>  | 400.13               |
| <b>Nucleus</b>                | <sup>1</sup> H                                     | <b>Original Points Count</b> | 32768                | <b>Points Count</b>     | 131072               |
| <b>Pulse Sequence</b>         | zg30                                               | <b>Solvent</b>               | ACETONITRILE-D3      | <b>Sweep Width (Hz)</b> | 8012.82              |
| <b>Temperature (degree C)</b> | 27.000                                             |                              |                      |                         |                      |

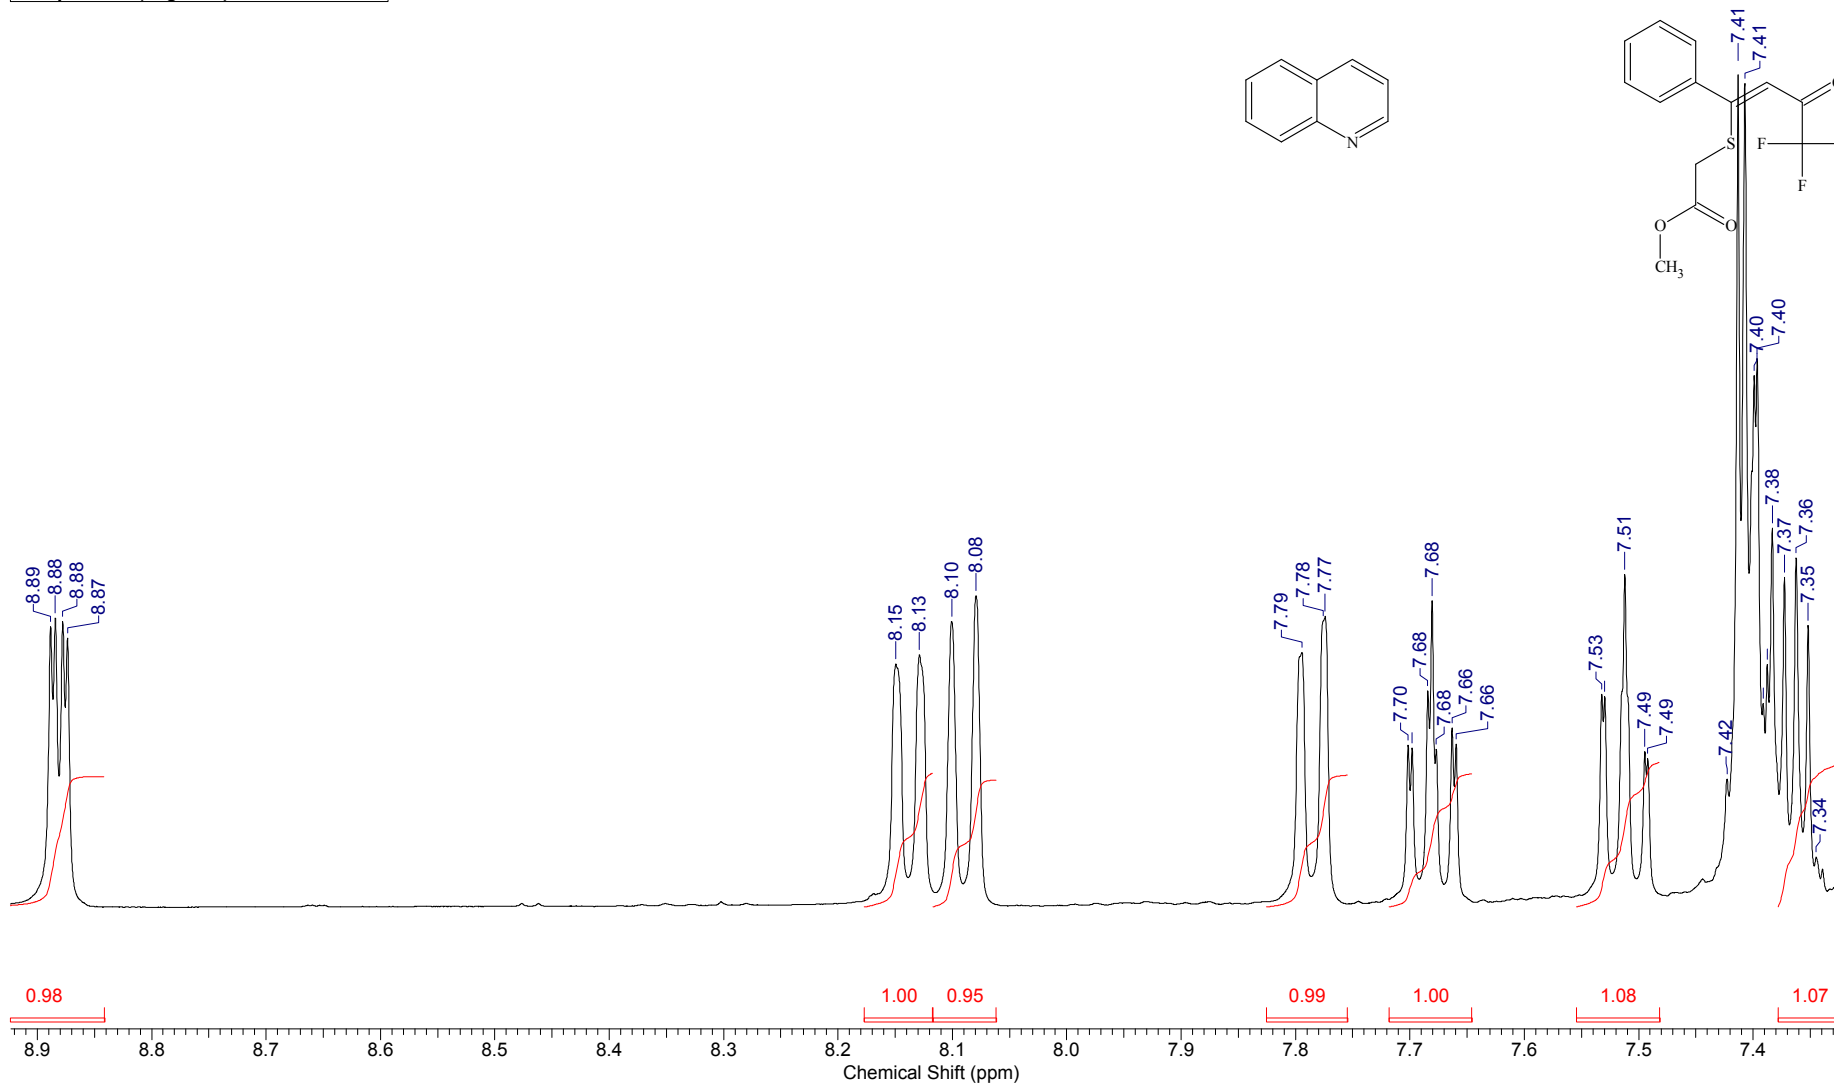

<sup>1</sup>H NMR spectrum of mixture of quinoline and methyl 2-((4,4,4-trifluoro-3-oxo-1-phenylbut-1-en-1-yl)thio)acetate **5** (400.1 MHz, CDCl<sub>3</sub>). The region with signals of quinoline are highlighted.

|                        |          |                        |                 |                      |                                                           |                       |       |
|------------------------|----------|------------------------|-----------------|----------------------|-----------------------------------------------------------|-----------------------|-------|
| Acquisition Time (sec) | 1.0000   | Date                   | Jun 3 2019      | File Name            | I:\SPEC_F_2019\2019.06.03\BM-1591_20190603_01\FLUORINE_01 |                       |       |
| Frequency (MHz)        | 376.31   | Nucleus                | <sup>19</sup> F | Number of Transients | 8                                                         | Original Points Count | 89286 |
| Points Count           | 131072   | Pulse Sequence         | s2pul           | Solvent              | CHLOROFORM-D                                              |                       |       |
| Sweep Width (Hz)       | 89285.71 | Temperature (degree C) | 21.000          |                      |                                                           |                       |       |

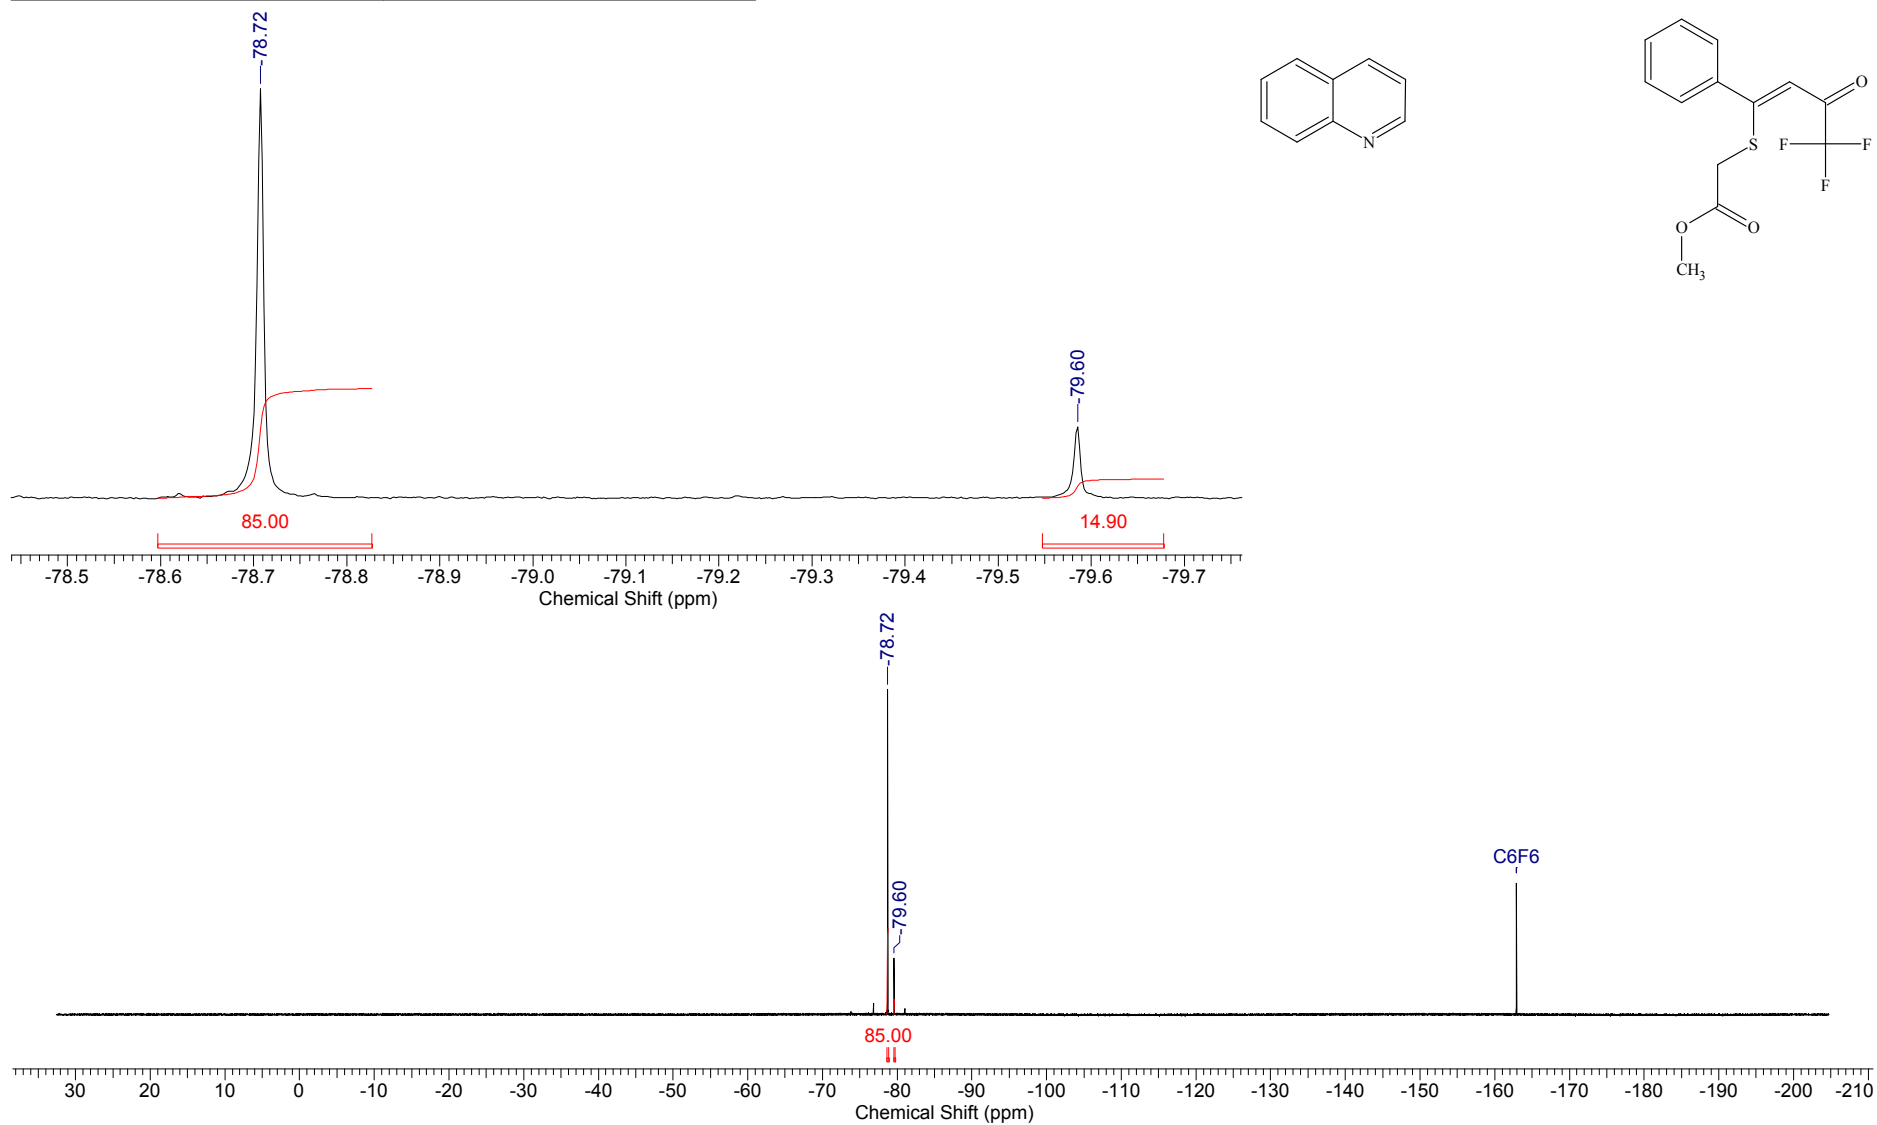

<sup>19</sup>F NMR spectrum of mixture of quinoline and methyl 2-((4,4,4-trifluoro-3-oxo-1-phenylbut-1-en-1-yl)thio)acetate **5** (376.5 MHz, CDCl<sub>3</sub>)

|                               |                                                    |                              |                      |                               |                      |
|-------------------------------|----------------------------------------------------|------------------------------|----------------------|-------------------------------|----------------------|
| <b>Acquisition Time (sec)</b> | 0.6783                                             | <b>Comment</b>               | Imported from UXNMR. | <b>Date</b>                   | 05 Jun 2019 17:41:04 |
| <b>File Name</b>              | C:\DOCS\OUTPUT_301\2019\06.epi\BM-1591-a.C_002001r | <b>Frequency (MHz)</b>       | 100.61               | <b>Nucleus</b>                | <sup>13</sup> C      |
| <b>Number of Transients</b>   | 361                                                | <b>Original Points Count</b> | 16384                | <b>Points Count</b>           | 131072               |
| <b>Solvent</b>                | CHLOROFORM-D                                       | <b>Sweep Width (Hz)</b>      | 24154.59             | <b>Pulse Sequence</b>         | zgpg30               |
|                               |                                                    |                              |                      | <b>Temperature (degree C)</b> | 27.000               |

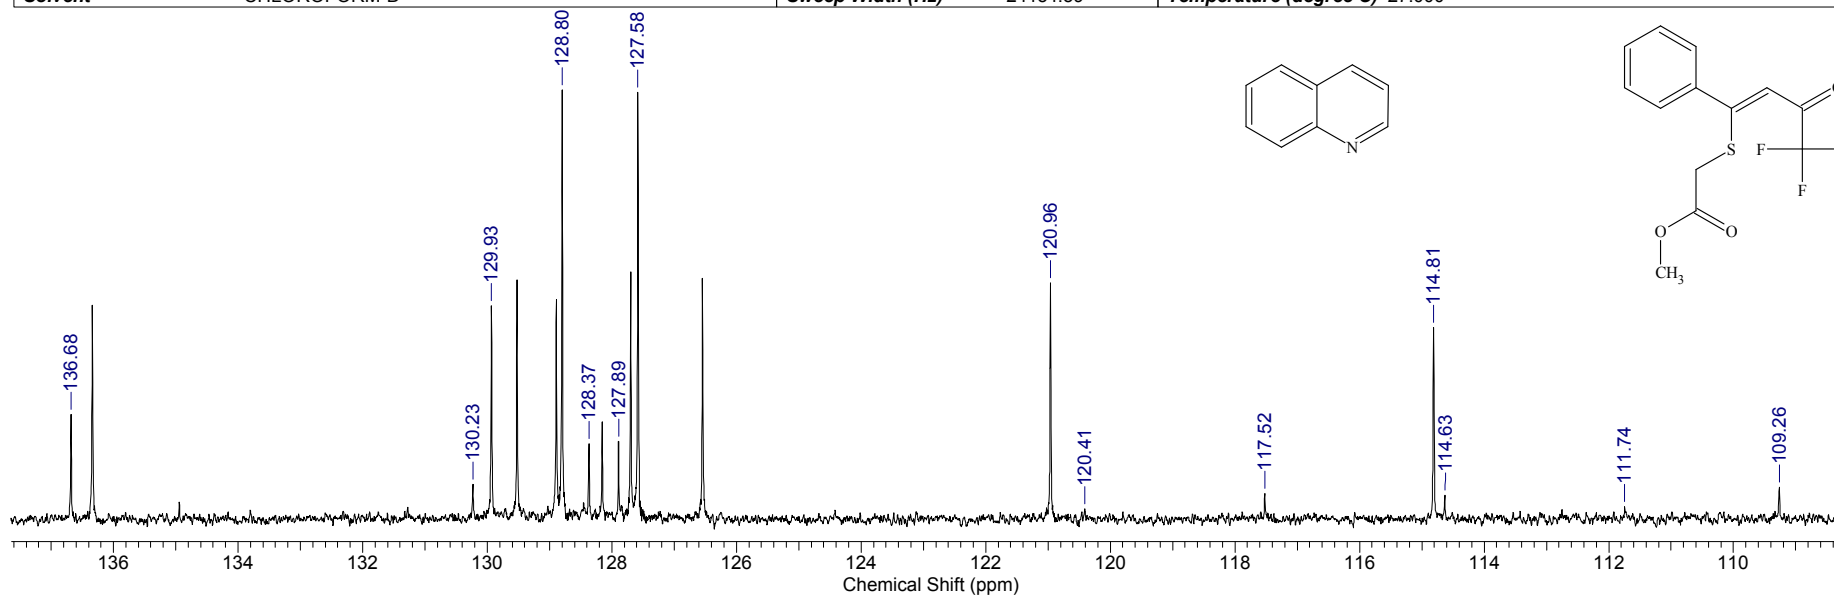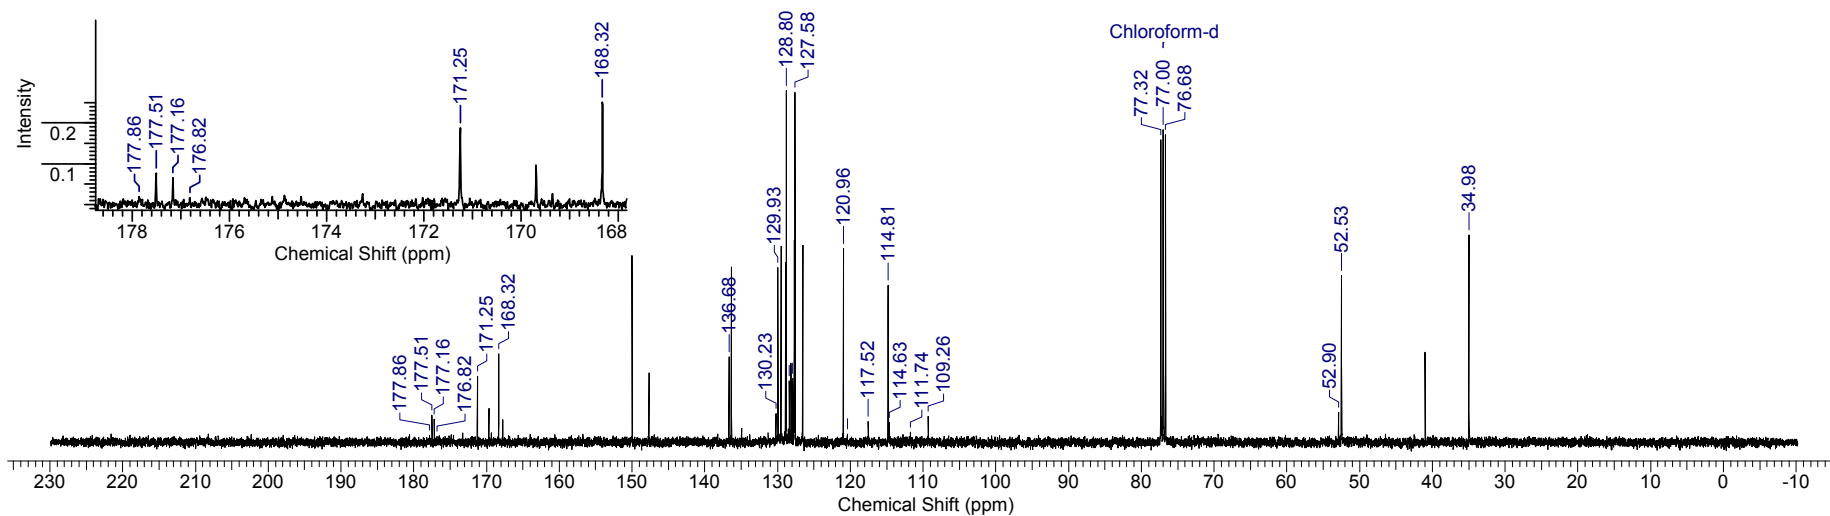

<sup>13</sup>C NMR spectrum of mixture of quinoline and methyl 2-((4,4,4-trifluoro-3-oxo-1-phenylbut-1-en-1-yl)thio)acetate **5** (100.6 MHz, CDCl<sub>3</sub>). The signals of compound **5** are highlighted.

|                               |                                                    |                              |                      |                               |                      |
|-------------------------------|----------------------------------------------------|------------------------------|----------------------|-------------------------------|----------------------|
| <b>Acquisition Time (sec)</b> | 0.6783                                             | <b>Comment</b>               | Imported from UXMNR. | <b>Date</b>                   | 05 Jun 2019 17:41:04 |
| <b>File Name</b>              | C:\DOCS\OUTPUT_301\2019\06.epi\BM-1591-a.C_002001r | <b>Frequency (MHz)</b>       | 100.61               | <b>Nucleus</b>                | <sup>13</sup> C      |
| <b>Number of Transients</b>   | 361                                                | <b>Original Points Count</b> | 16384                | <b>Points Count</b>           | 131072               |
| <b>Solvent</b>                | CHLOROFORM-D                                       | <b>Sweep Width (Hz)</b>      | 24154.59             | <b>Pulse Sequence</b>         | zgpg30               |
|                               |                                                    |                              |                      | <b>Temperature (degree C)</b> | 27.000               |

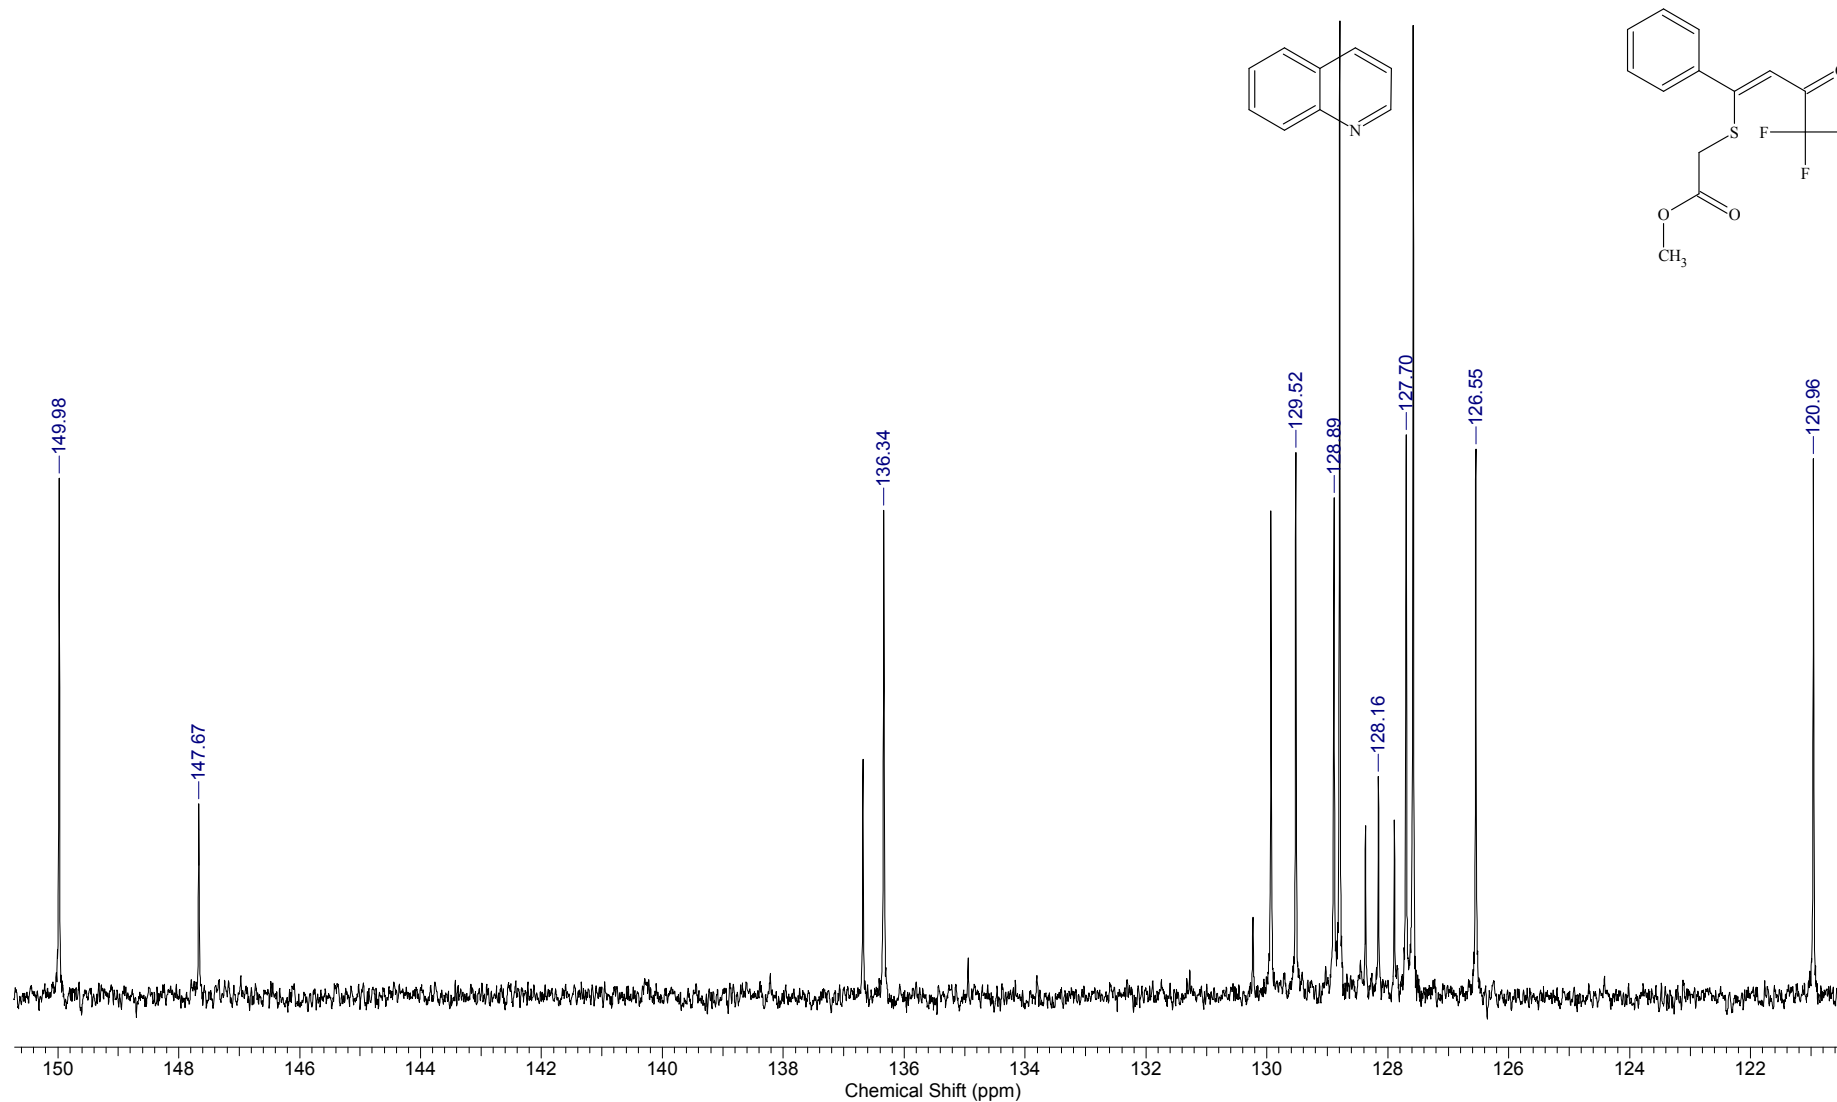

<sup>13</sup>C NMR spectrum of mixture of quinoline and methyl 2-((4,4,4-trifluoro-3-oxo-1-phenylbut-1-en-1-yl)thio)acetate **5** (100.6 MHz, CDCl<sub>3</sub>). The signals of quinoline are highlighted.

|                               |                                                 |                              |                      |                               |                      |
|-------------------------------|-------------------------------------------------|------------------------------|----------------------|-------------------------------|----------------------|
| <b>Acquisition Time (sec)</b> | 4.0894                                          | <b>Comment</b>               | Imported from UXMNR. | <b>Date</b>                   | 20 Jun 2019 19:27:10 |
| <b>File Name</b>              | C:\Users\BM-1\Downloads\BM-1607\BM-1607_001001r | <b>Frequency (MHz)</b>       | 400.13               | <b>Nucleus</b>                | <sup>1</sup> H       |
| <b>Number of Transients</b>   | 8                                               | <b>Original Points Count</b> | 32768                | <b>Points Count</b>           | 131072               |
| <b>Solvent</b>                | CHLOROFORM-D                                    | <b>Sweep Width (Hz)</b>      | 8012.82              | <b>Pulse Sequence</b>         | zg30                 |
|                               |                                                 |                              |                      | <b>Temperature (degree C)</b> | 27.000               |

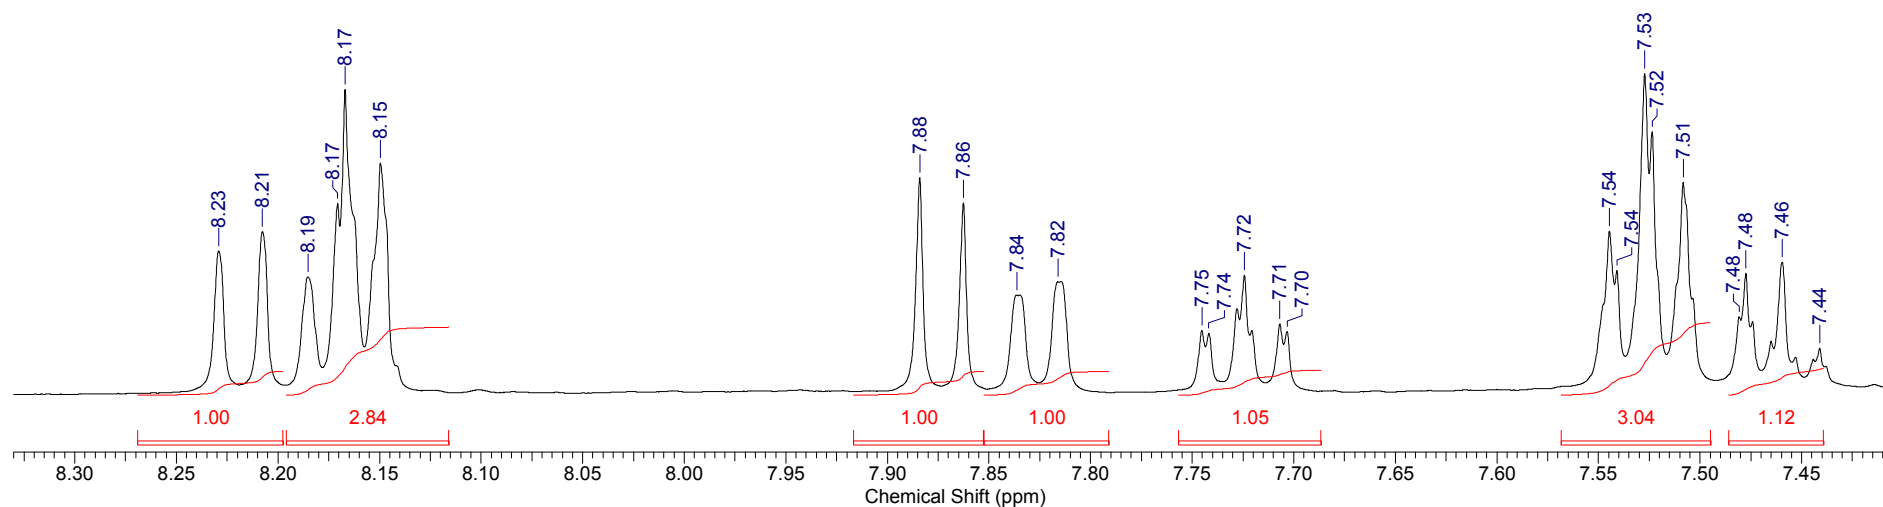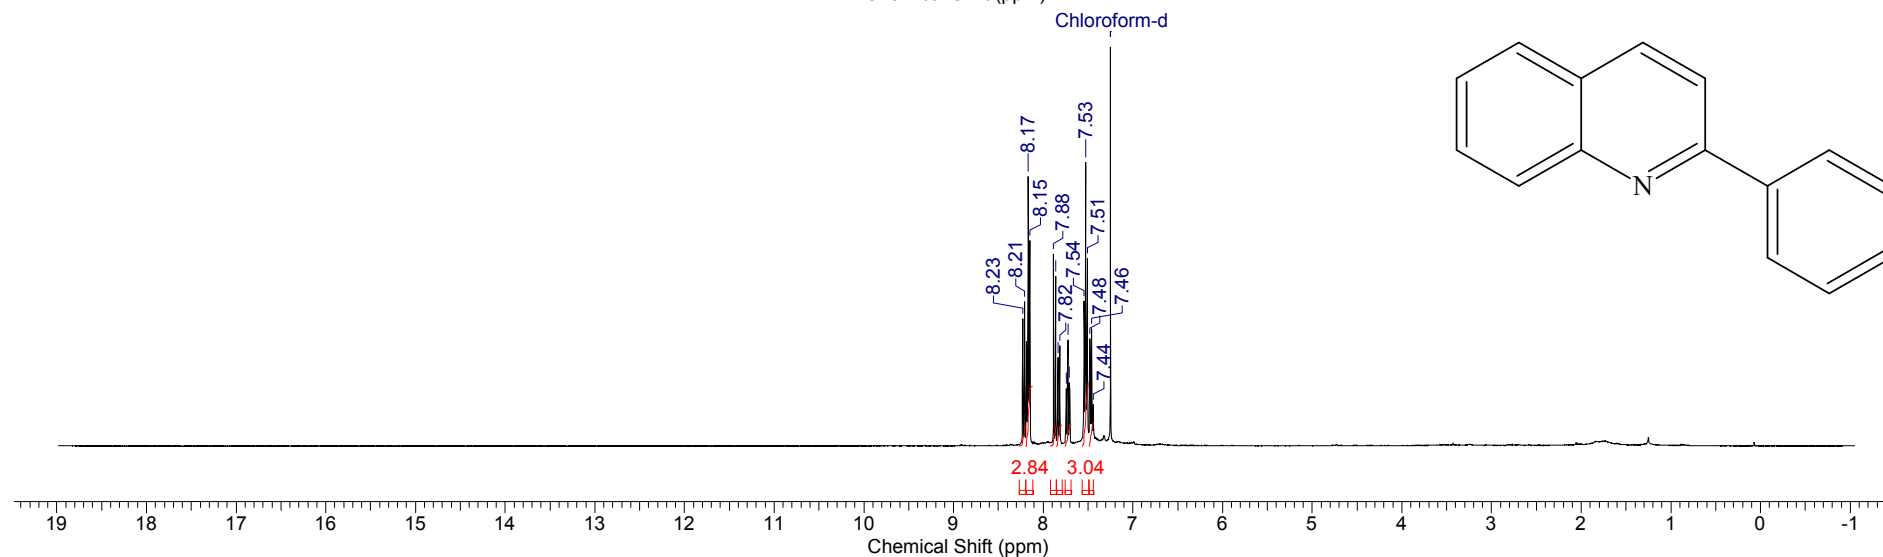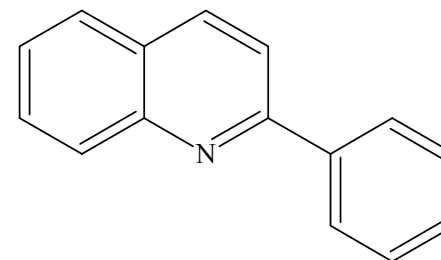

<sup>1</sup>H NMR spectrum of **6** (400.1 MHz, CDCl<sub>3</sub>).

|                               |                                                  |                              |                      |                               |             |                      |
|-------------------------------|--------------------------------------------------|------------------------------|----------------------|-------------------------------|-------------|----------------------|
| <b>Acquisition Time (sec)</b> | 0.6783                                           | <b>Comment</b>               | Imported from UXMNR. |                               | <b>Date</b> | 01 Jun 2019 14:15:34 |
| <b>File Name</b>              | C:\DOCS\OUTPUT_301\2019\06.epi\BM-1595.C_002001r | <b>Frequency (MHz)</b>       | 100.61               | <b>Nucleus</b>                | 13C         |                      |
| <b>Number of Transients</b>   | 146                                              | <b>Original Points Count</b> | 16384                | <b>Points Count</b>           | 131072      |                      |
| <b>Solvent</b>                | ACETONITRILE-D3                                  | <b>Sweep Width (Hz)</b>      | 24154.59             | <b>Pulse Sequence</b>         | zgpg30      |                      |
|                               |                                                  |                              |                      | <b>Temperature (degree C)</b> | 27.000      |                      |

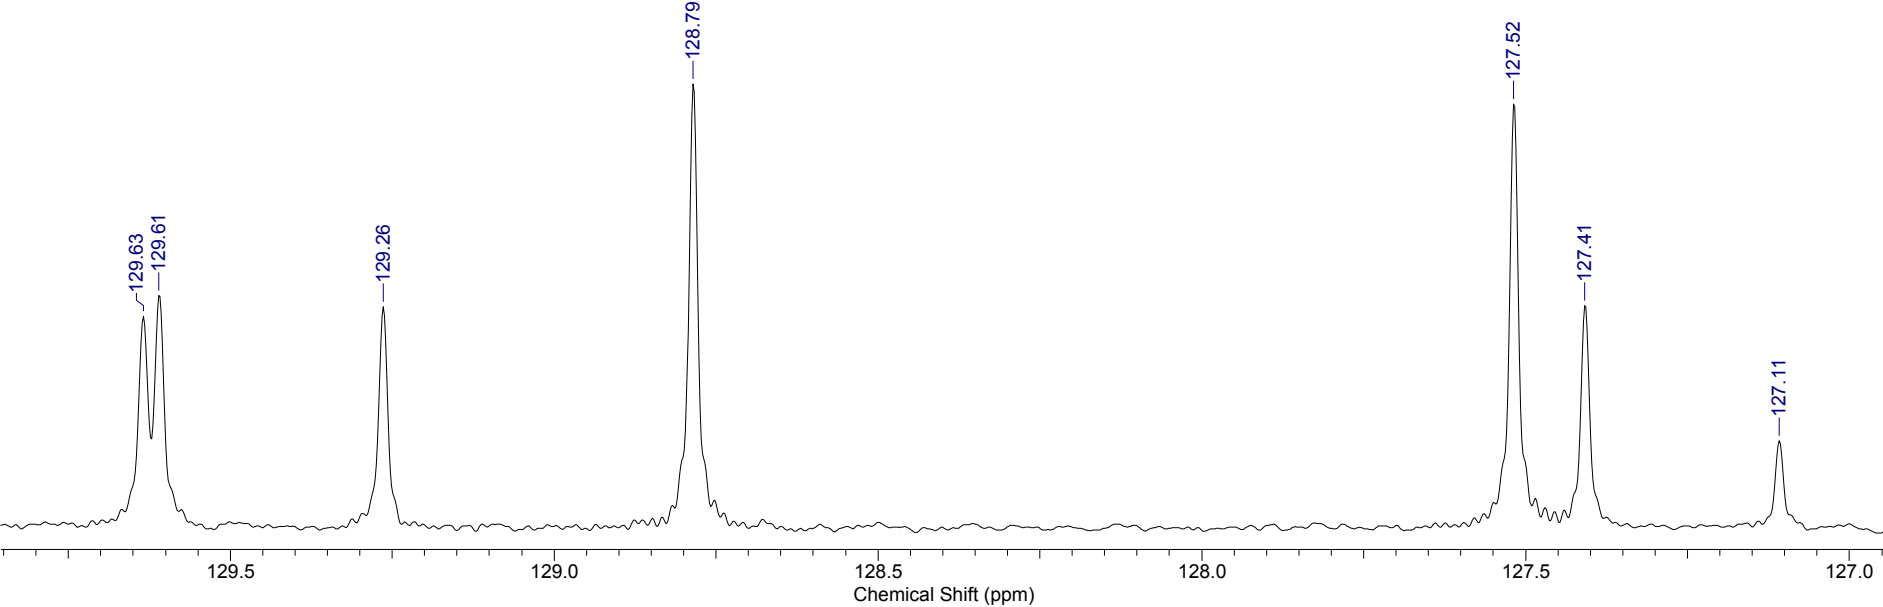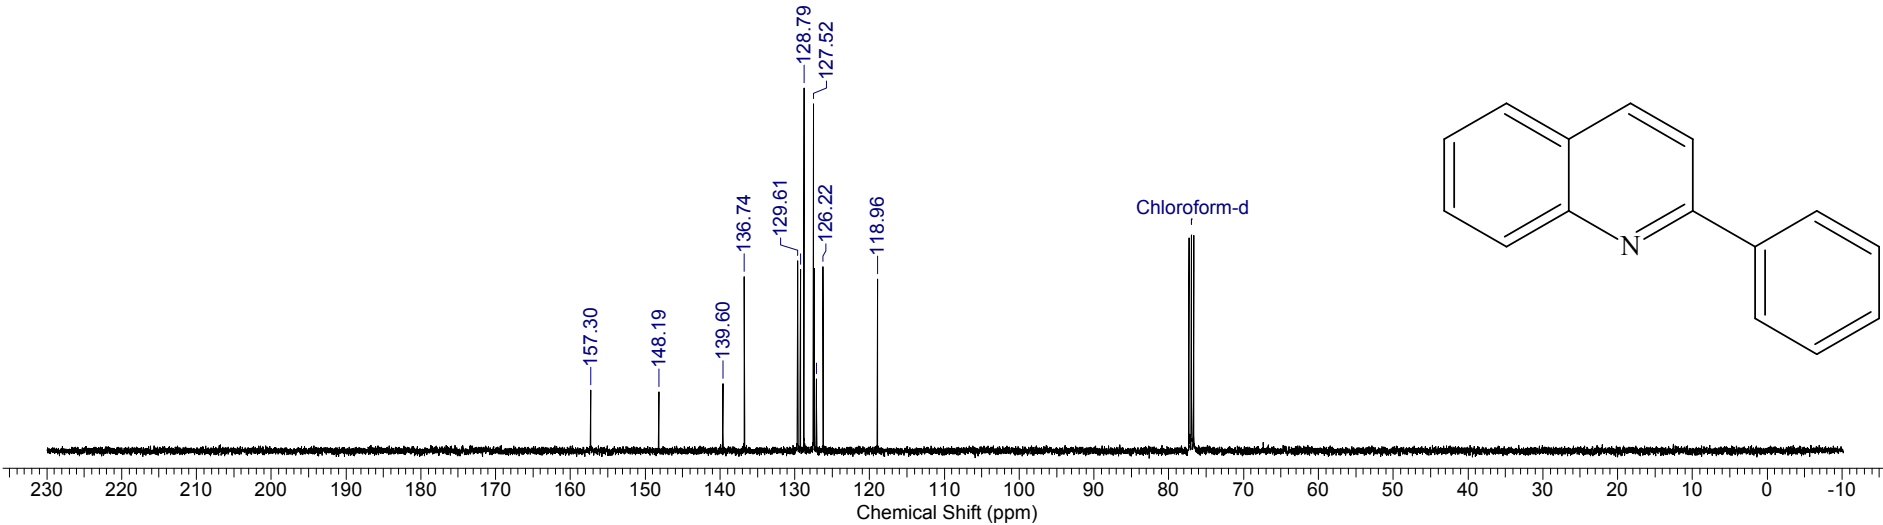

<sup>13</sup>C NMR spectrum of **6** (100.6 MHz, CDCl<sub>3</sub>)



|                               |                                                    |                             |                      |                               |                      |
|-------------------------------|----------------------------------------------------|-----------------------------|----------------------|-------------------------------|----------------------|
| <b>Acquisition Time (sec)</b> | 4.0894                                             | <b>Comment</b>              | Imported from UXNMR. | <b>Date</b>                   | 08 Jul 2019 15:50:32 |
| <b>File Name</b>              | C:\DOCS\OUTPUT_301\2019\07.epä\BM-1623-1.H_001001r |                             |                      | <b>Frequency (MHz)</b>        | 400.13               |
| <b>Nucleus</b>                | 1H                                                 | <b>Number of Transients</b> | 4                    | <b>Original Points Count</b>  | 32768                |
| <b>Pulse Sequence</b>         | zg30                                               | <b>Solvent</b>              | DMSO-D6              | <b>Sweep Width (Hz)</b>       | 8012.82              |
|                               |                                                    |                             |                      | <b>Points Count</b>           | 131072               |
|                               |                                                    |                             |                      | <b>Temperature (degree C)</b> | 27.000               |

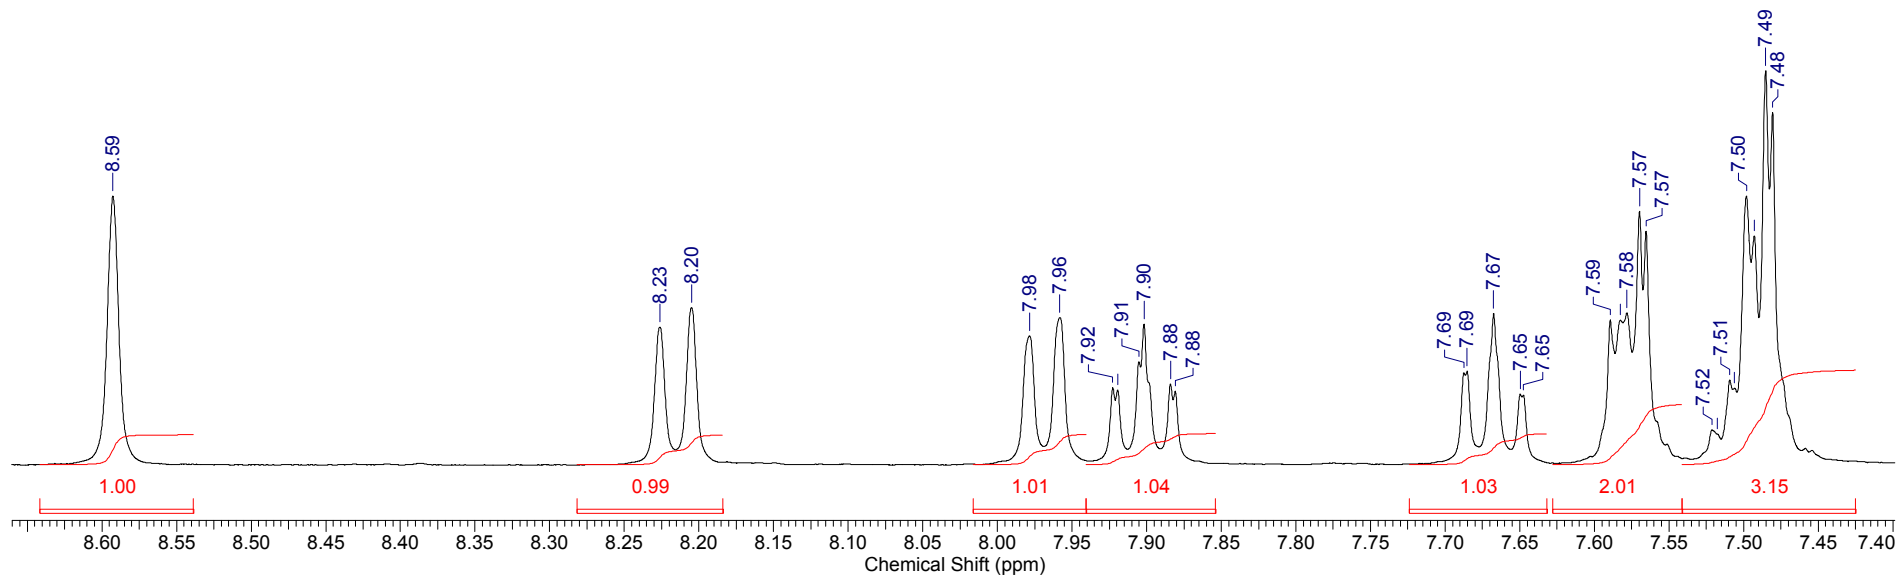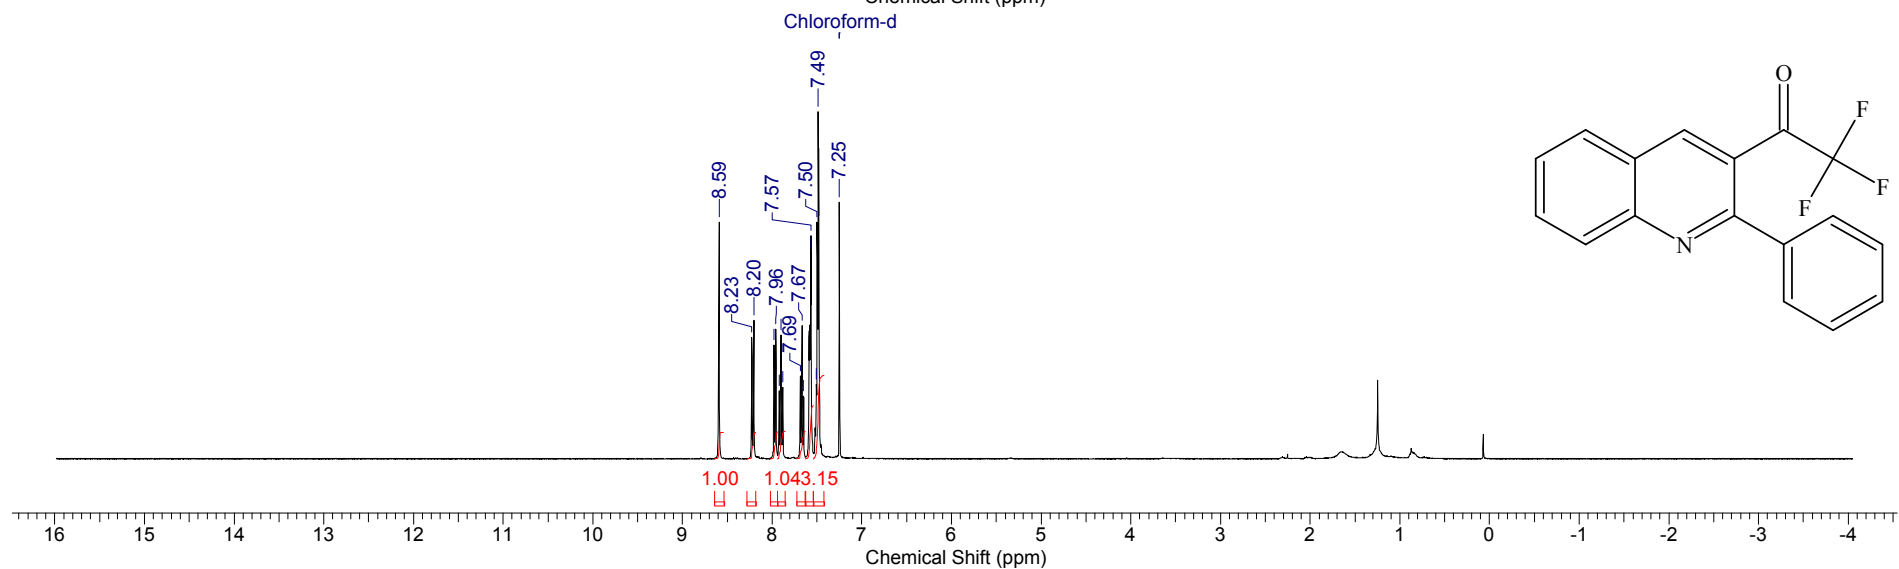

<sup>1</sup>H NMR spectrum of 7 (400.1 MHz, CDCl<sub>3</sub>)

|                               |          |                               |            |                             |                                                                     |                              |       |
|-------------------------------|----------|-------------------------------|------------|-----------------------------|---------------------------------------------------------------------|------------------------------|-------|
| <b>Acquisition Time (sec)</b> | 0.7340   | <b>Date</b>                   | Jul 5 2019 | <b>File Name</b>            | C:\DOCS\OUTPUT_301\F19\2019.07.05\BM-1623-R_20190705_01\FLUORINE_01 |                              |       |
| <b>Frequency (MHz)</b>        | 376.31   | <b>Nucleus</b>                | 19F        | <b>Number of Transients</b> | 16                                                                  | <b>Original Points Count</b> | 65536 |
| <b>Points Count</b>           | 65536    | <b>Pulse Sequence</b>         | s2pul      | <b>Solvent</b>              | CHLOROFORM-D                                                        |                              |       |
| <b>Sweep Width (Hz)</b>       | 89285.71 | <b>Temperature (degree C)</b> | 25.000     |                             |                                                                     |                              |       |

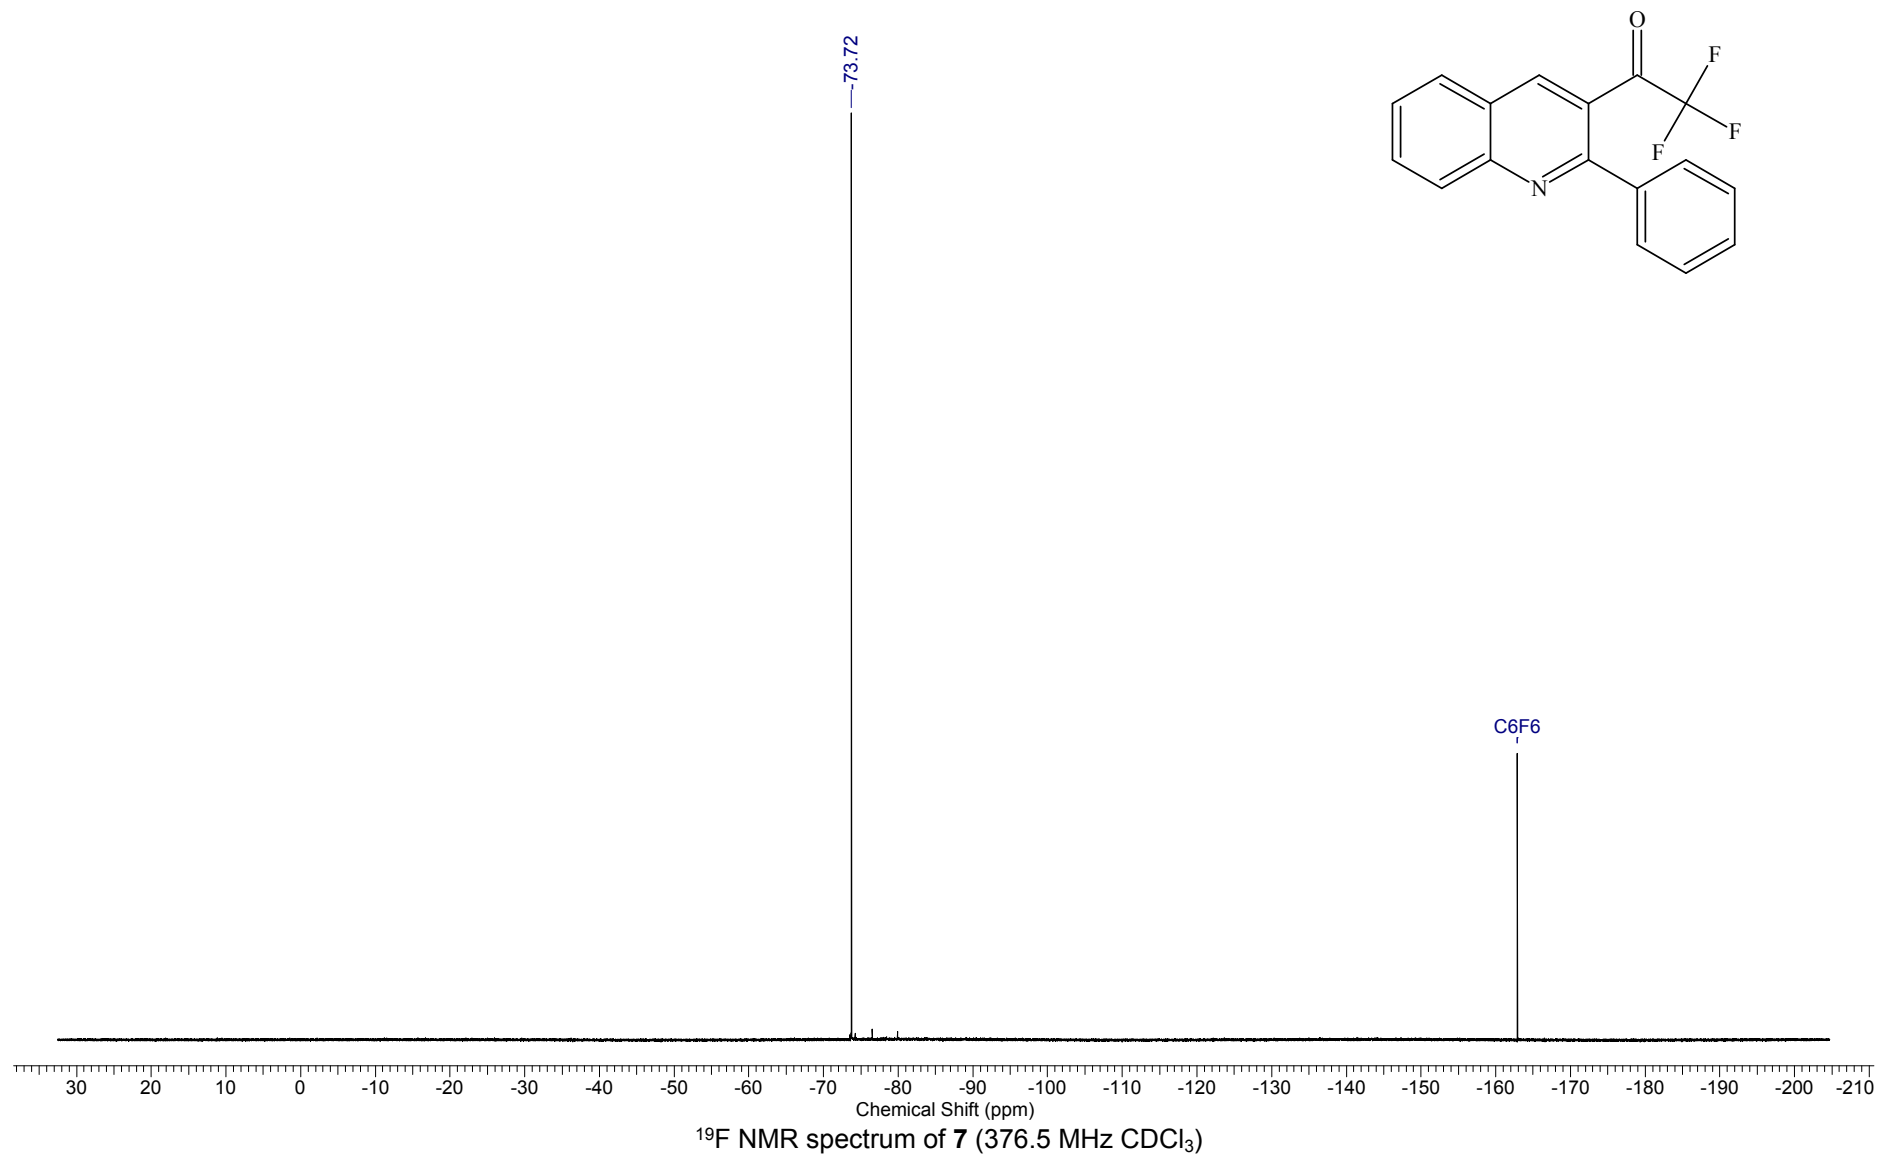

|                               |                                                     |                             |                      |                              |             |                               |        |
|-------------------------------|-----------------------------------------------------|-----------------------------|----------------------|------------------------------|-------------|-------------------------------|--------|
| <b>Acquisition Time (sec)</b> | 0.6783                                              | <b>Comment</b>              | Imported from UXMNR. |                              | <b>Date</b> | 08 Jul 2019 16:10:16          |        |
| <b>File Name</b>              | C:\DOCS\OUTPUT_301\2019\07.ep èüBM-1623-1.C_002001r |                             |                      | <b>Frequency (MHz)</b>       | 100.61      |                               |        |
| <b>Nucleus</b>                | <sup>13</sup> C                                     | <b>Number of Transients</b> | 505                  | <b>Original Points Count</b> | 16384       | <b>Points Count</b>           | 131072 |
| <b>Pulse Sequence</b>         | zgpg30                                              | <b>Solvent</b>              | DMSO-D6              | <b>Sweep Width (Hz)</b>      | 24154.59    | <b>Temperature (degree C)</b> | 27.000 |

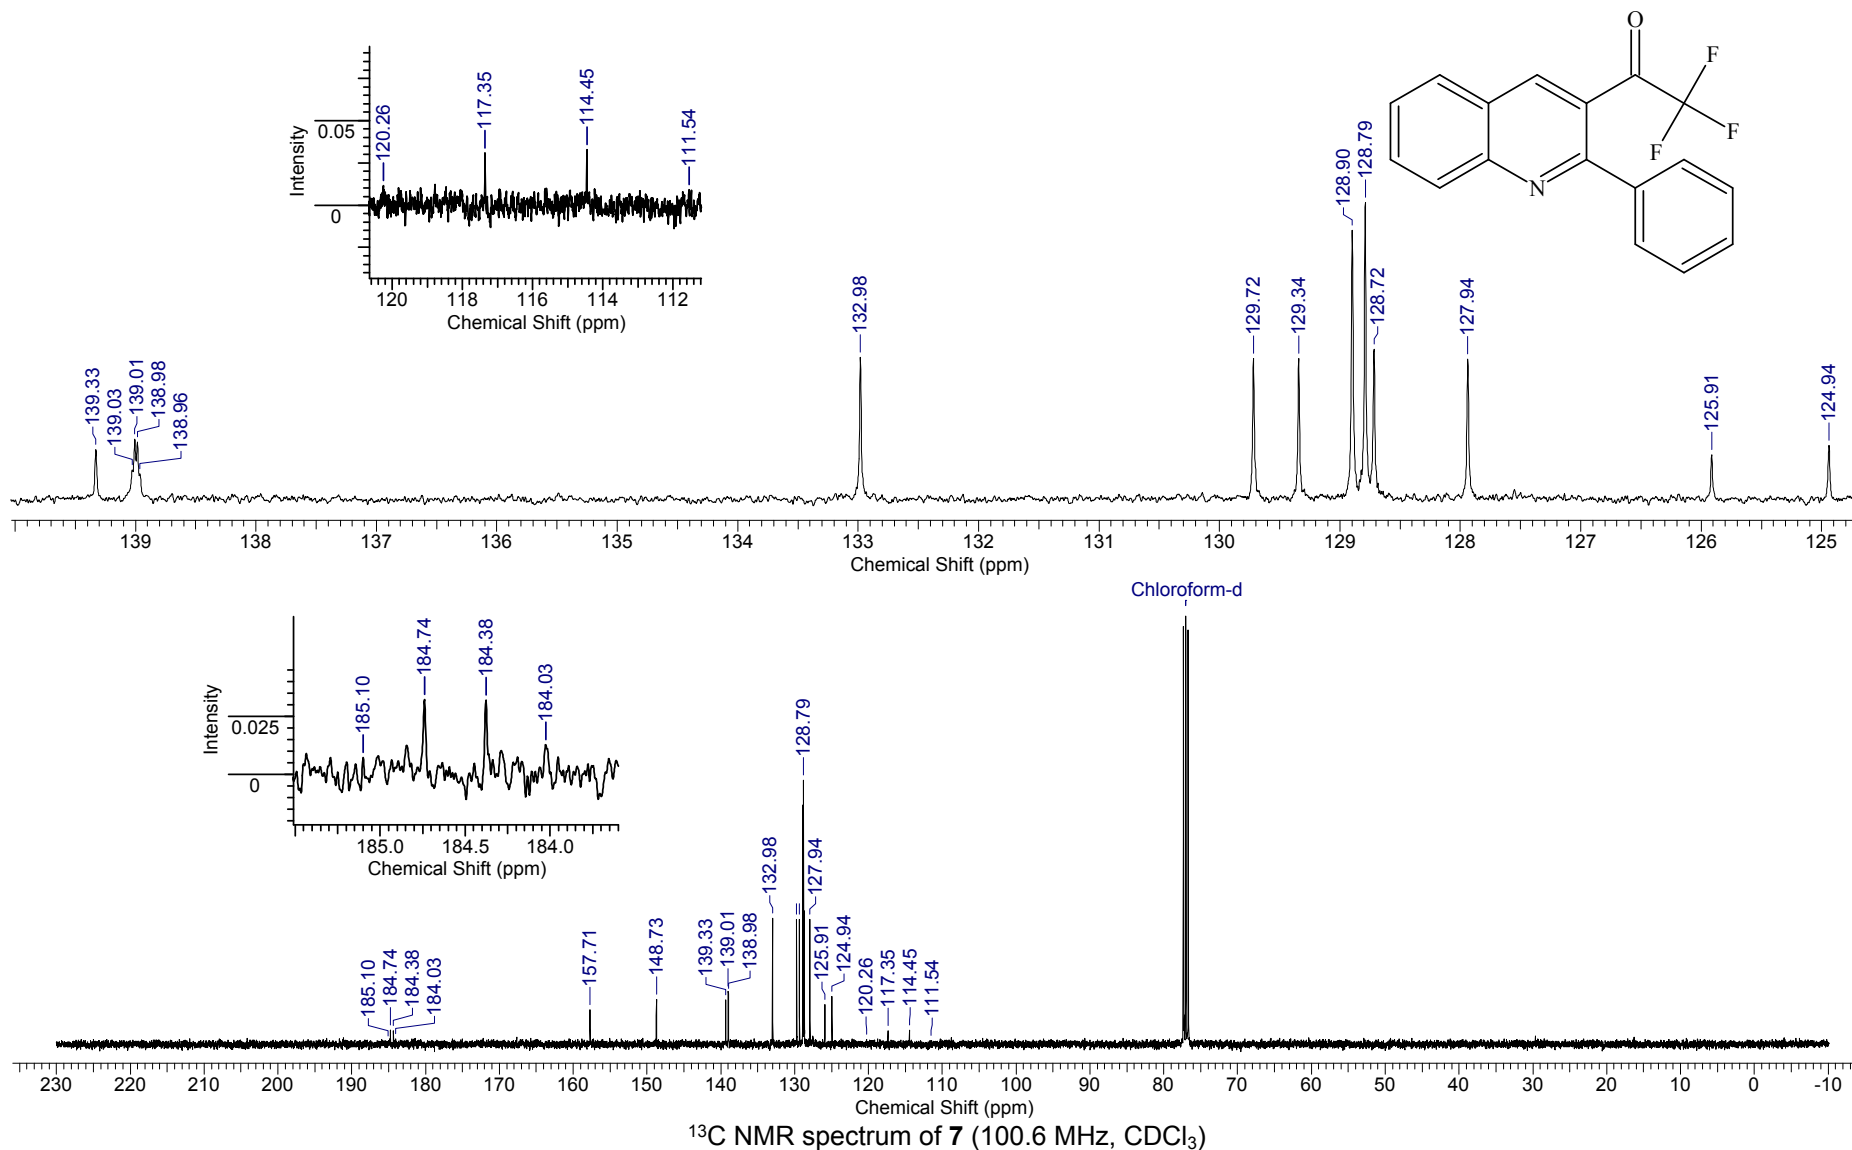

1H.1.fid

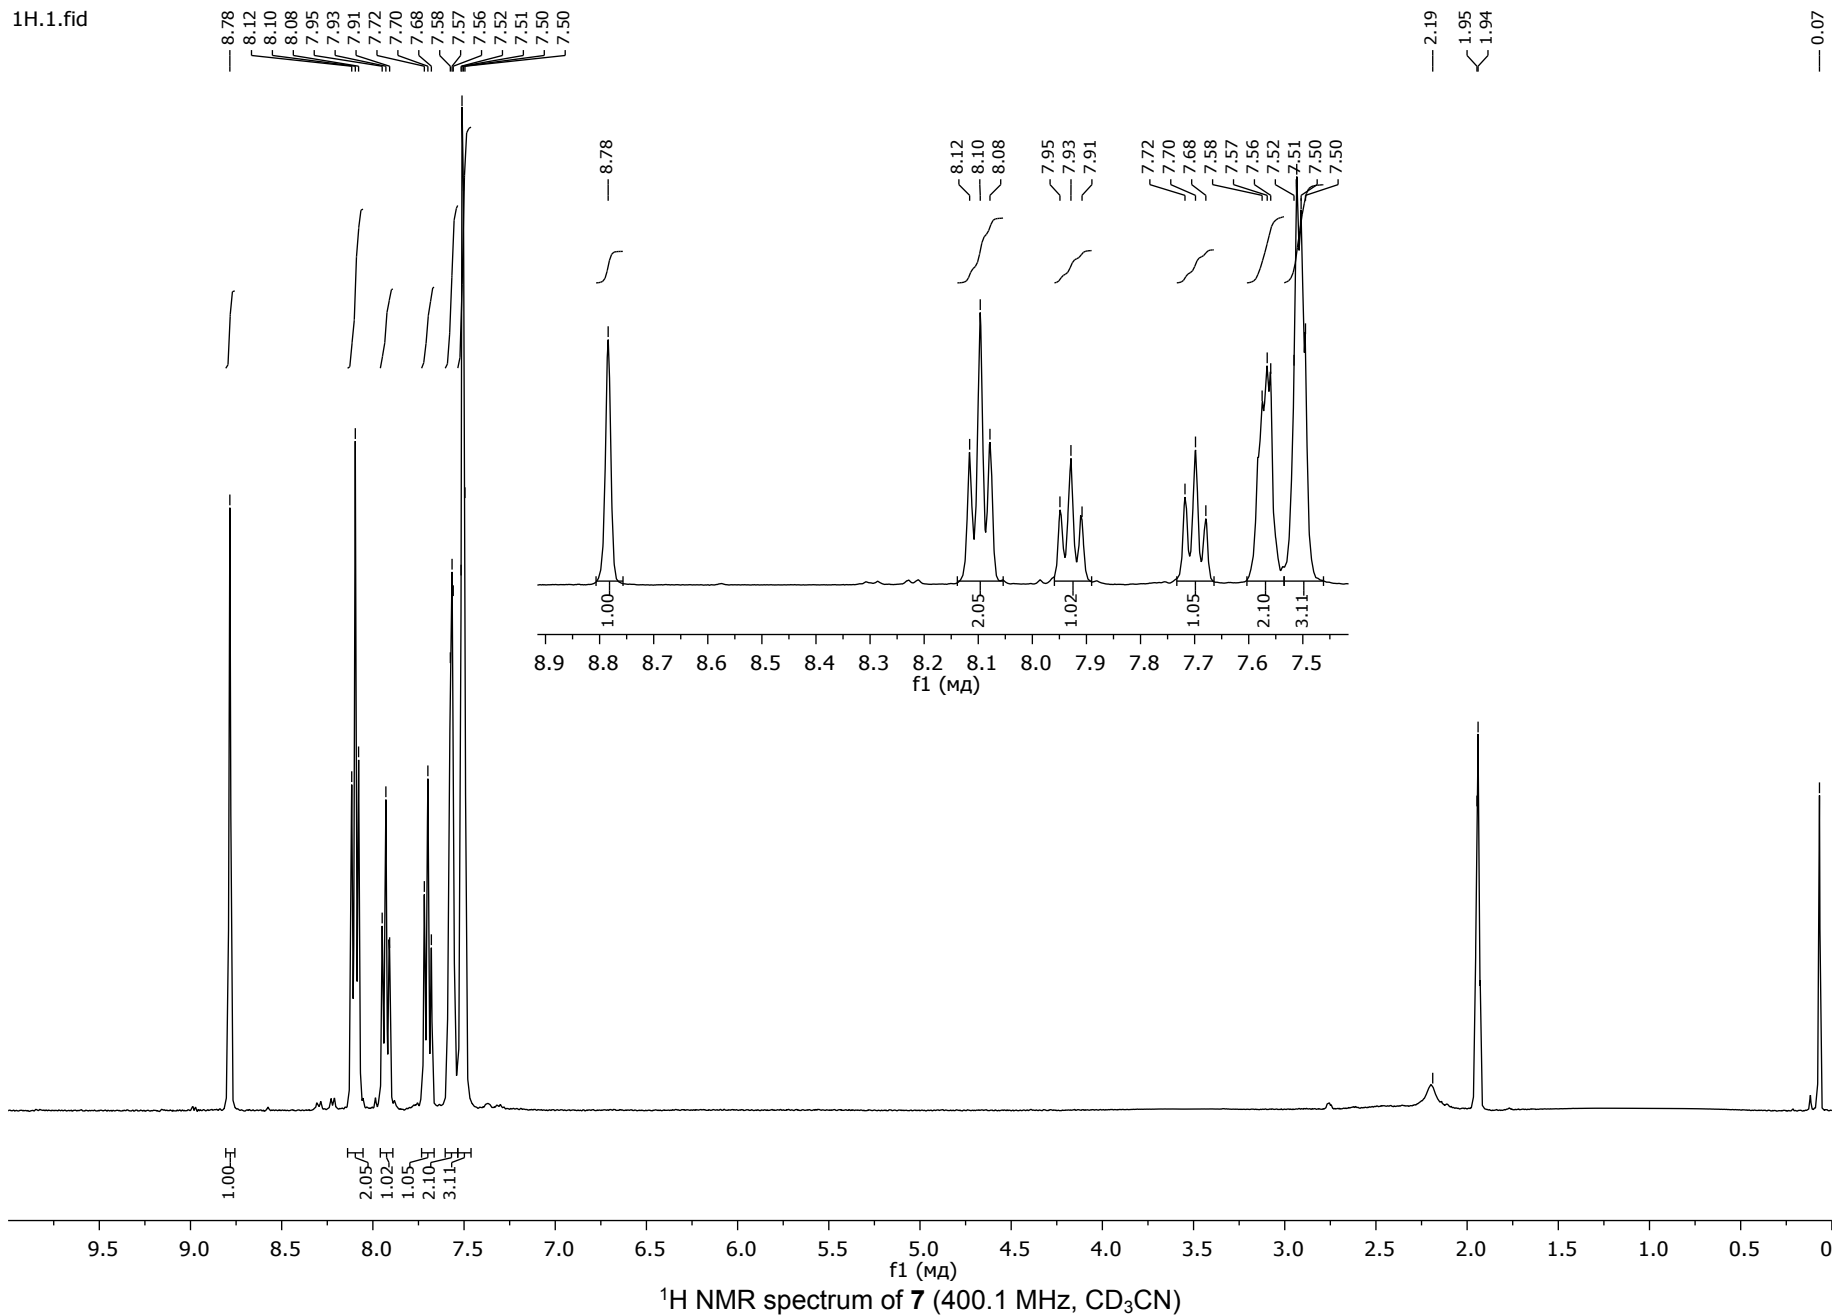

19F\_1.fid  
F19

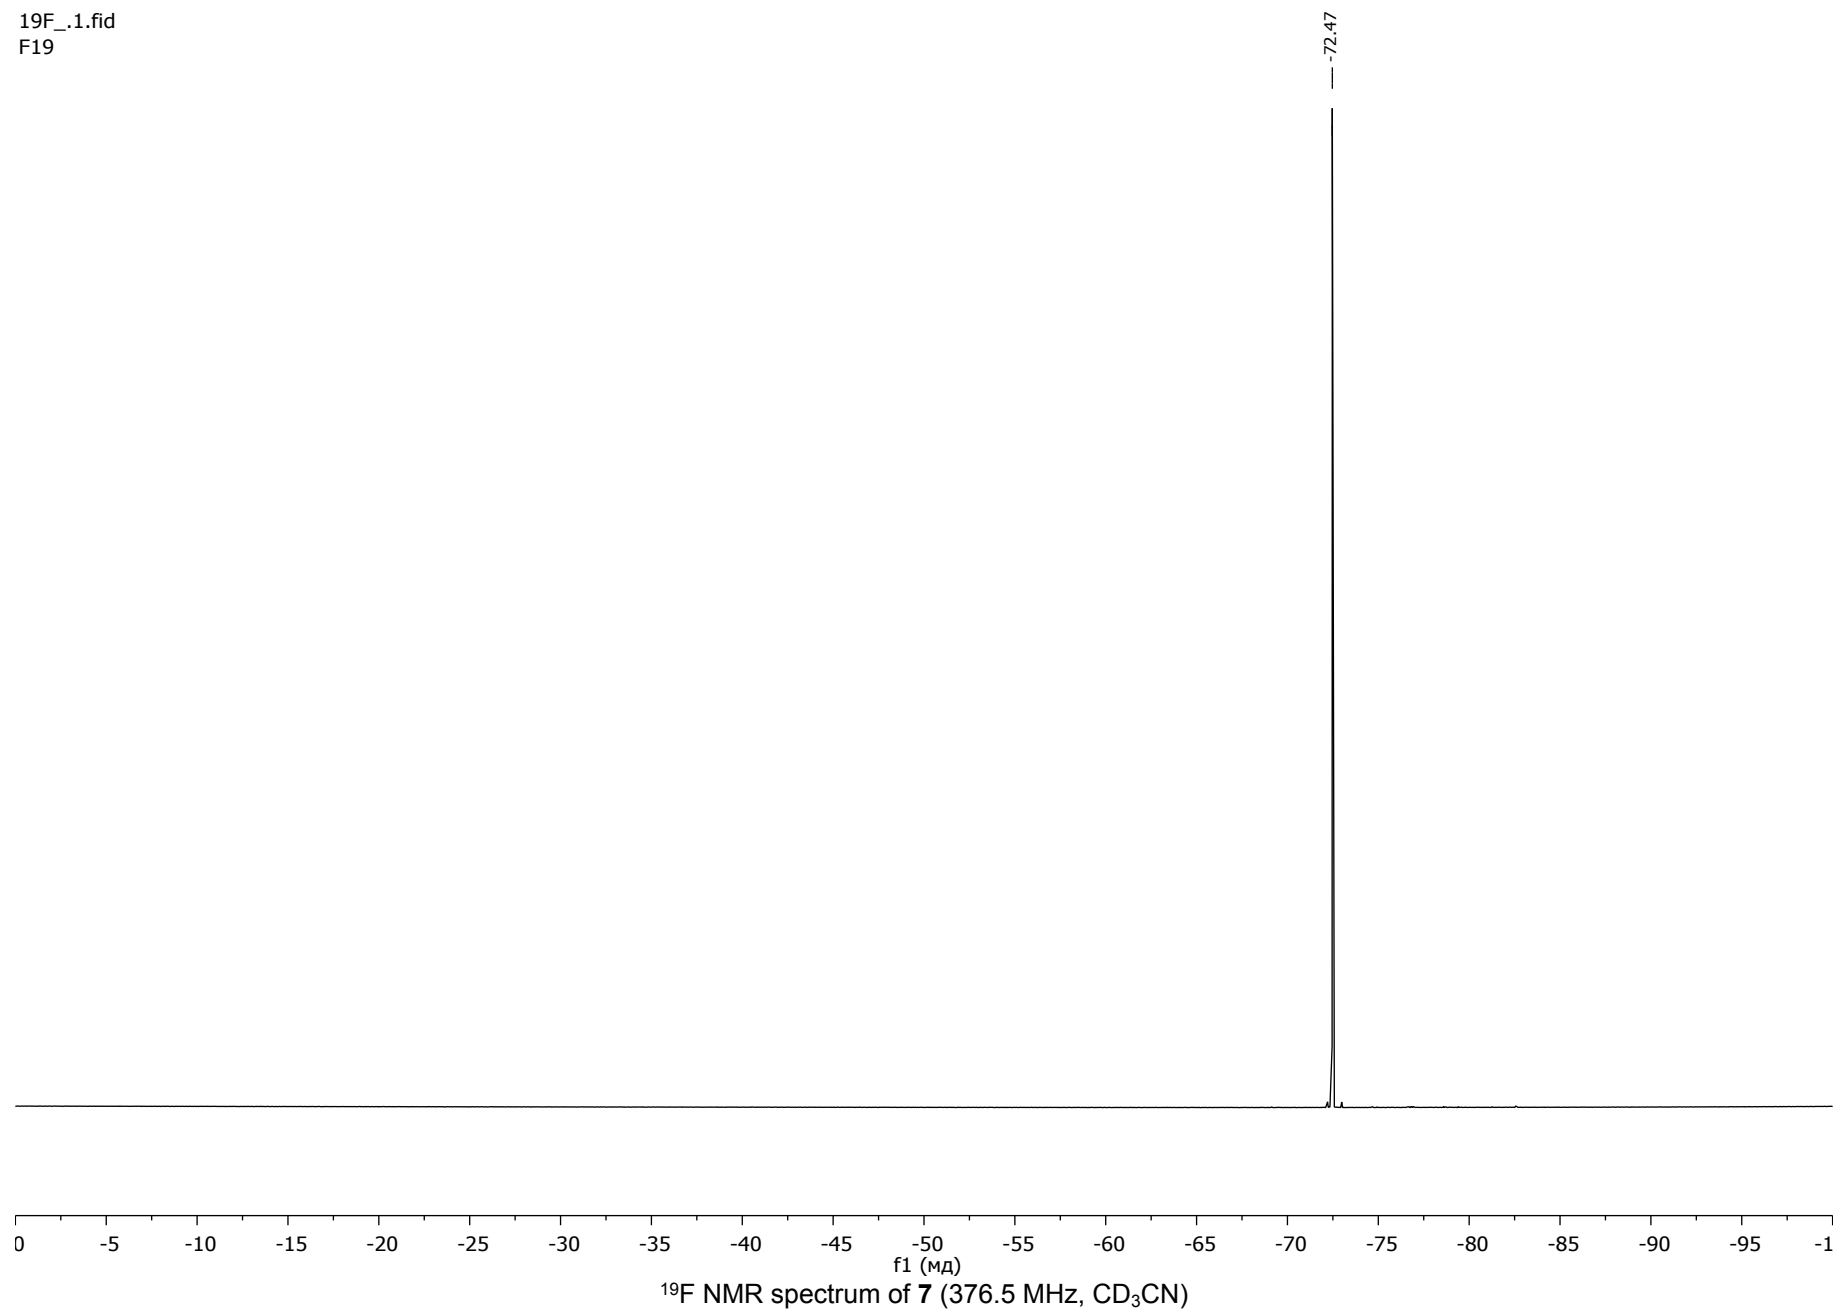

13C\_1.fid

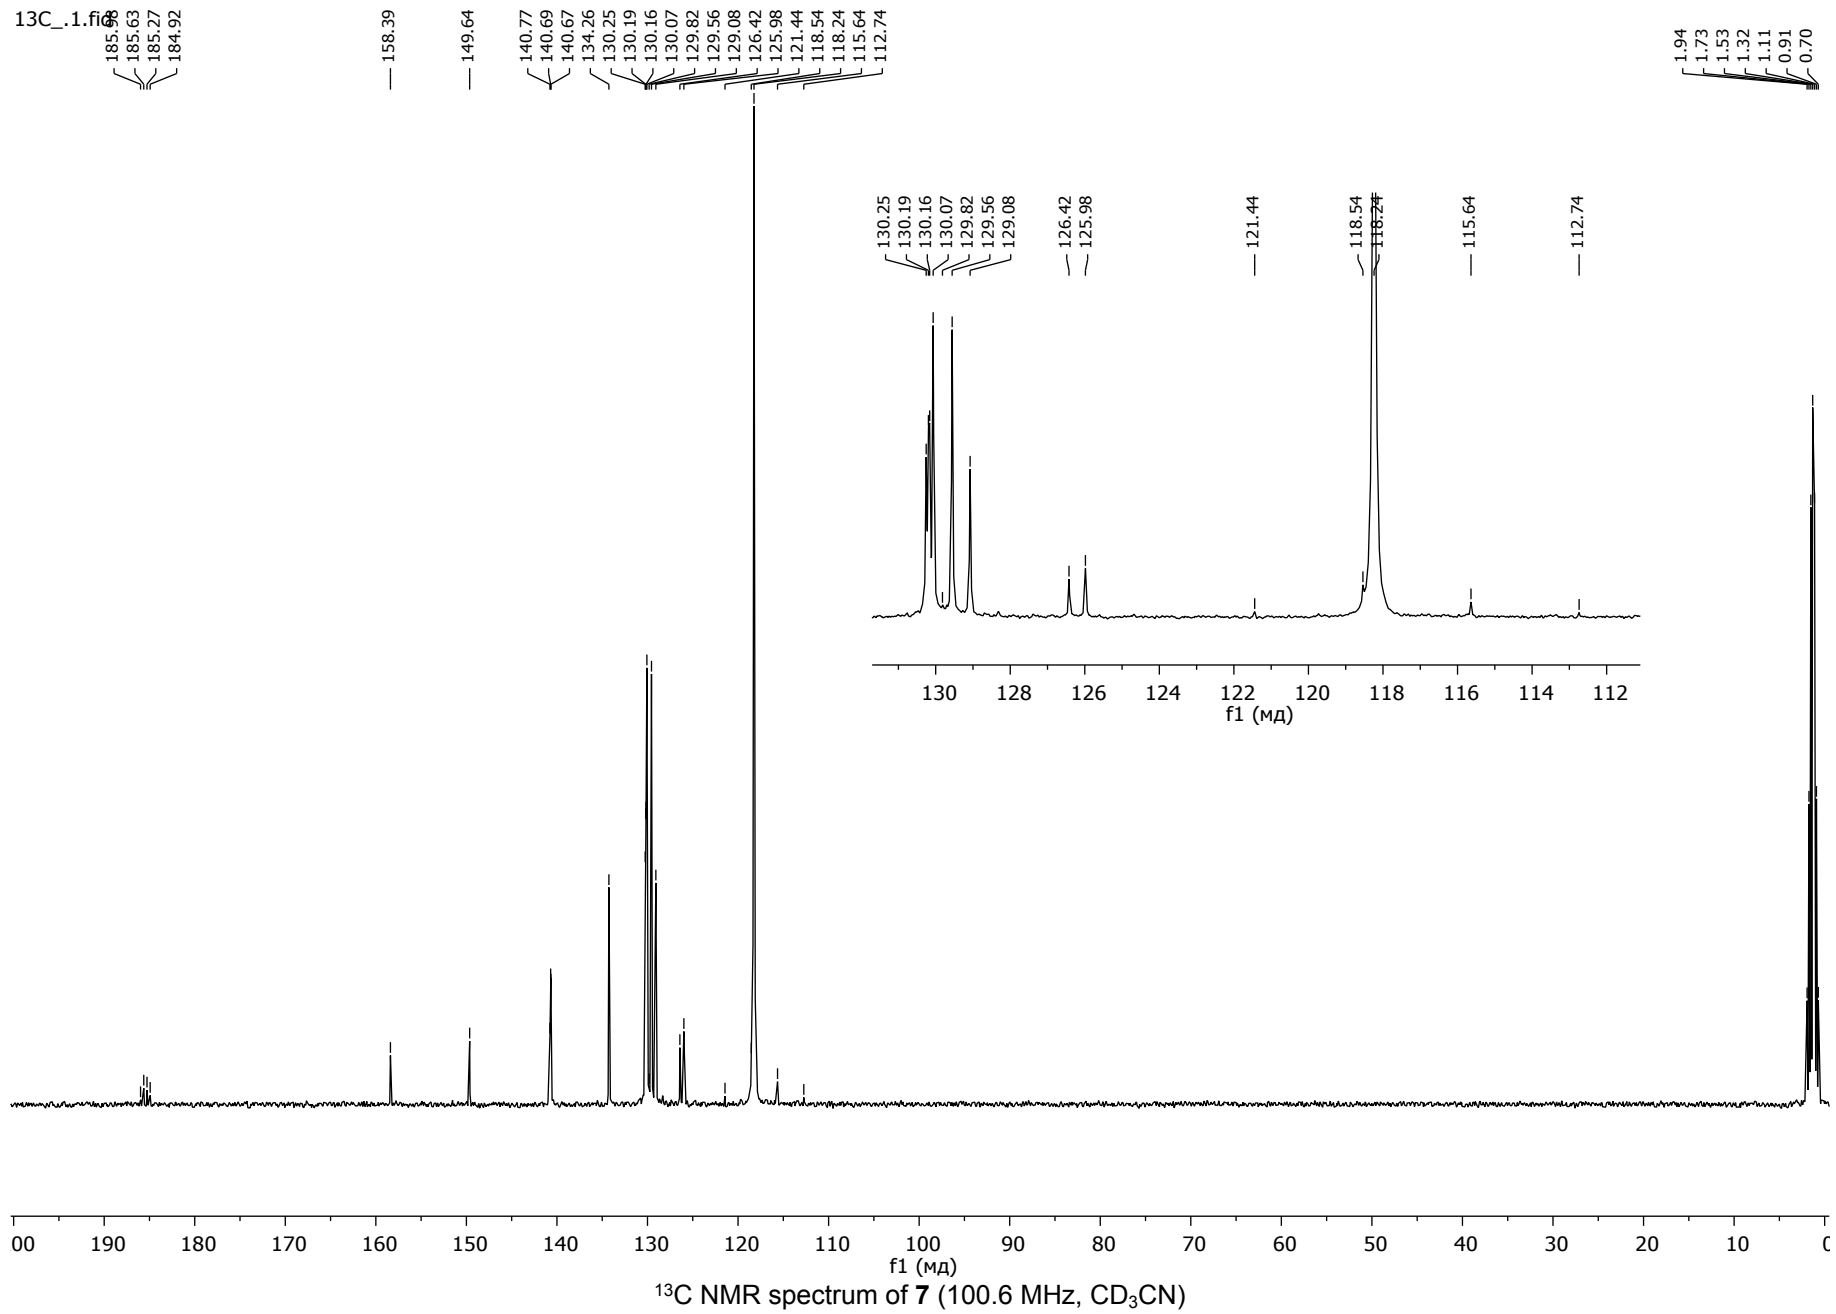

|                               |                                |                               |                      |                       |                      |                             |              |
|-------------------------------|--------------------------------|-------------------------------|----------------------|-----------------------|----------------------|-----------------------------|--------------|
| <b>Acquisition Time (sec)</b> | 4.0894                         | <b>Comment</b>                | Imported from UXNMR. | <b>Date</b>           | 28 Sep 2019 10:32:32 |                             |              |
| <b>File Name</b>              | I:\BM-1716-2\BM-1716-2_001001r | <b>Frequency (MHz)</b>        | 400.13               | <b>Nucleus</b>        | 1H                   | <b>Number of Transients</b> | 8            |
| <b>Original Points Count</b>  | 32768                          | <b>Points Count</b>           | 131072               | <b>Pulse Sequence</b> | zg30                 | <b>Solvent</b>              | CHLOROFORM-D |
| <b>Sweep Width (Hz)</b>       | 8012.82                        | <b>Temperature (degree C)</b> | 27.000               |                       |                      |                             |              |

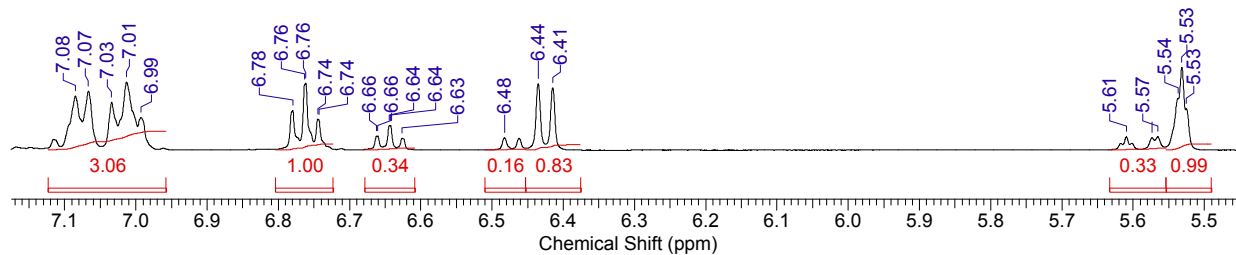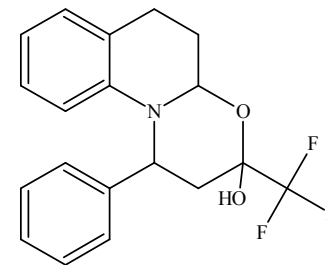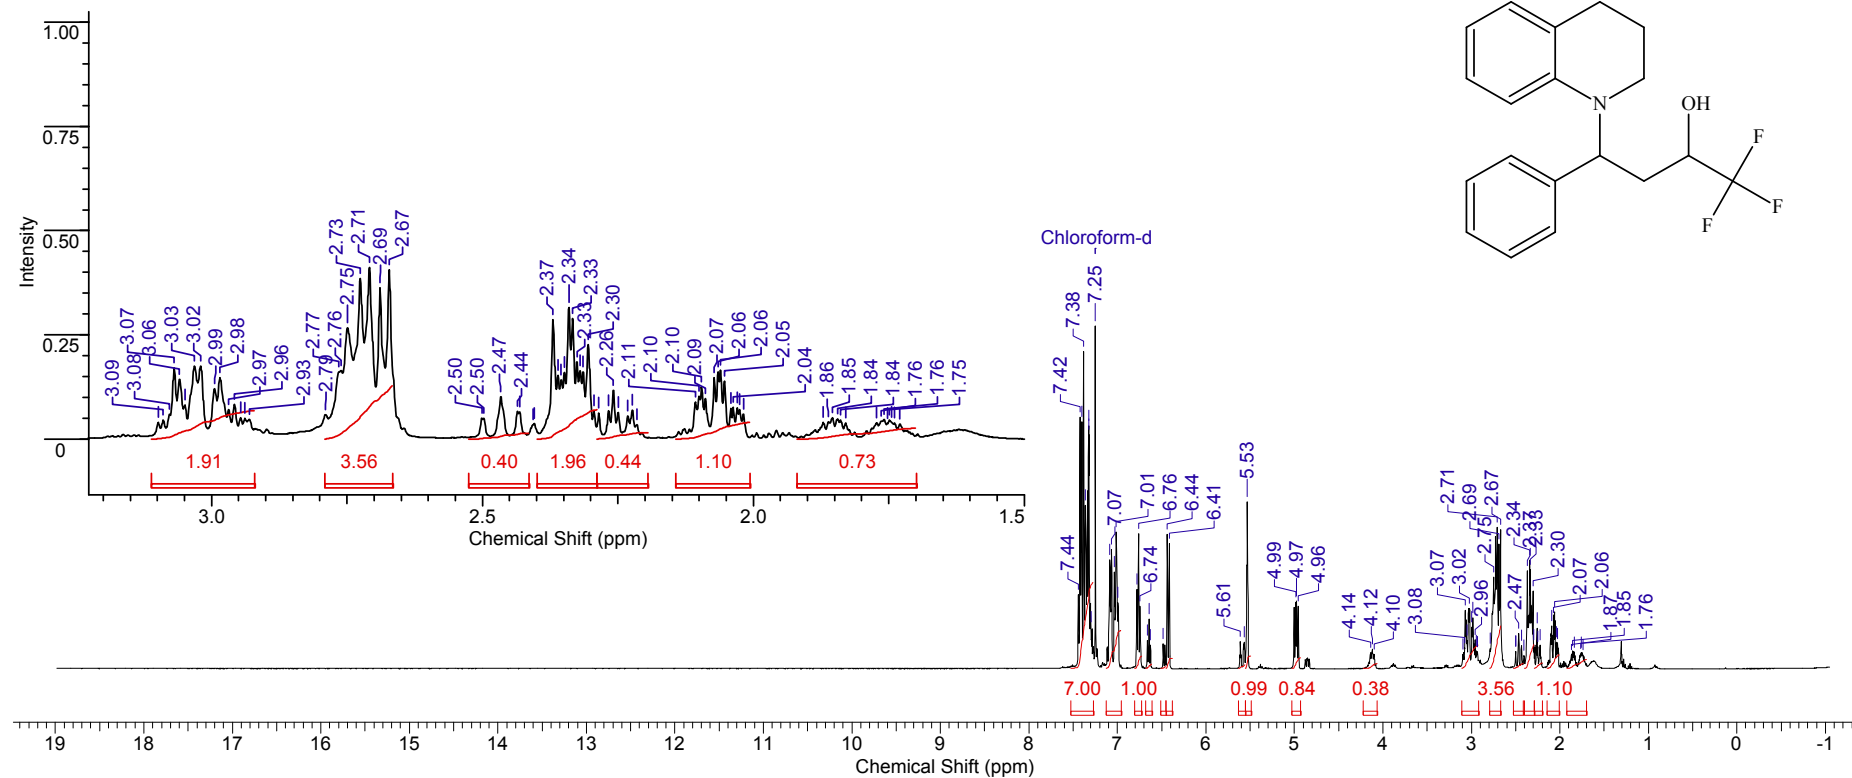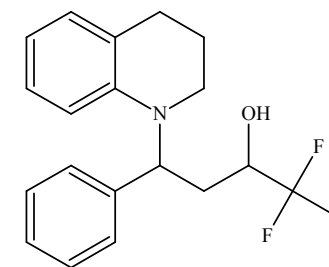

$^1\text{H}$  NMR spectrum of **8** and **9** (400.1 MHz,  $\text{CDCl}_3$ )

|                               |          |                               |             |                             |                                                                     |                              |        |
|-------------------------------|----------|-------------------------------|-------------|-----------------------------|---------------------------------------------------------------------|------------------------------|--------|
| <b>Acquisition Time (sec)</b> | 2.0000   | <b>Date</b>                   | Sep 30 2019 | <b>File Name</b>            | C:\DOCS\OUTPUT_301\F19\2019.09.30\BM-1716-2_20190930_01\FLUORINE_01 |                              |        |
| <b>Frequency (MHz)</b>        | 376.31   | <b>Nucleus</b>                | 19F         | <b>Number of Transients</b> | 16                                                                  | <b>Original Points Count</b> | 178571 |
| <b>Points Count</b>           | 262144   | <b>Pulse Sequence</b>         | s2pul       | <b>Solvent</b>              | CHLOROFORM-D                                                        |                              |        |
| <b>Sweep Width (Hz)</b>       | 89285.71 | <b>Temperature (degree C)</b> | 20.000      |                             |                                                                     |                              |        |

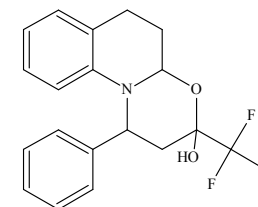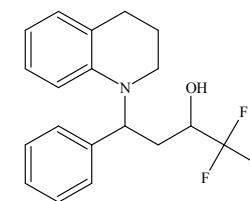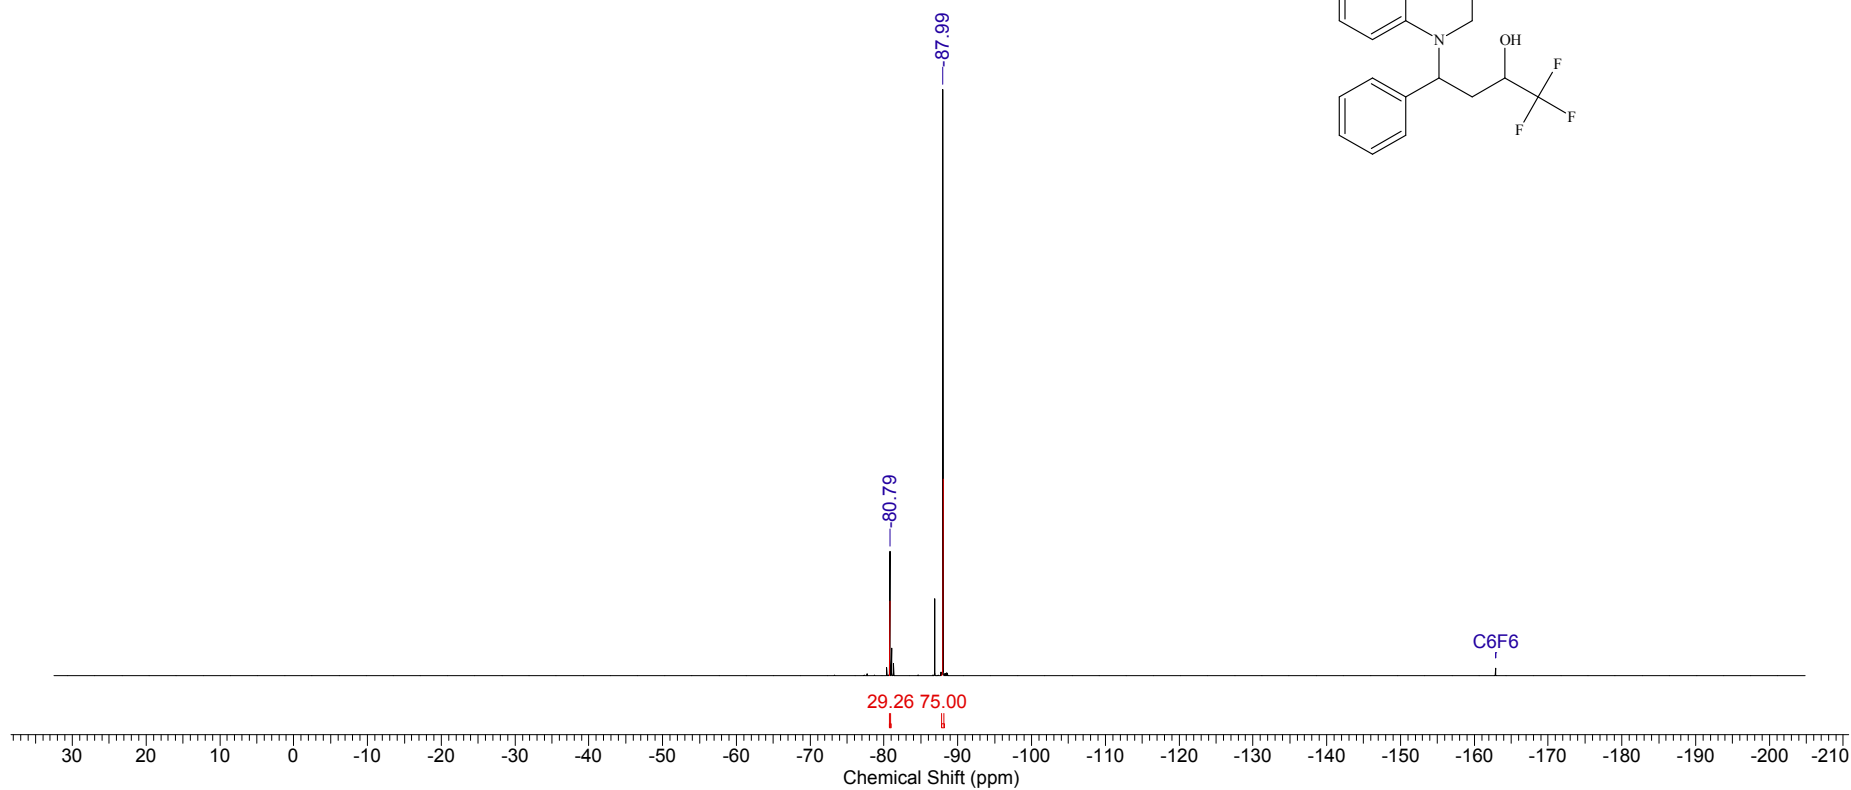

<sup>19</sup>F NMR spectrum of **8** and **9** (376.5 MHz CDCl<sub>3</sub>)



|                               |                                |                               |                      |                       |                      |                             |              |
|-------------------------------|--------------------------------|-------------------------------|----------------------|-----------------------|----------------------|-----------------------------|--------------|
| <b>Acquisition Time (sec)</b> | 0.6783                         | <b>Comment</b>                | Imported from UXMNR. | <b>Date</b>           | 28 Sep 2019 11:10:38 |                             |              |
| <b>File Name</b>              | I:\BM-1716-2\BM-1716-2_002001r | <b>Frequency (MHz)</b>        | 100.61               | <b>Nucleus</b>        | 13C                  | <b>Number of Transients</b> | 904          |
| <b>Original Points Count</b>  | 16384                          | <b>Points Count</b>           | 131072               | <b>Pulse Sequence</b> | zgpg30               | <b>Solvent</b>              | CHLOROFORM-D |
| <b>Sweep Width (Hz)</b>       | 24154.59                       | <b>Temperature (degree C)</b> | 27.000               |                       |                      |                             |              |

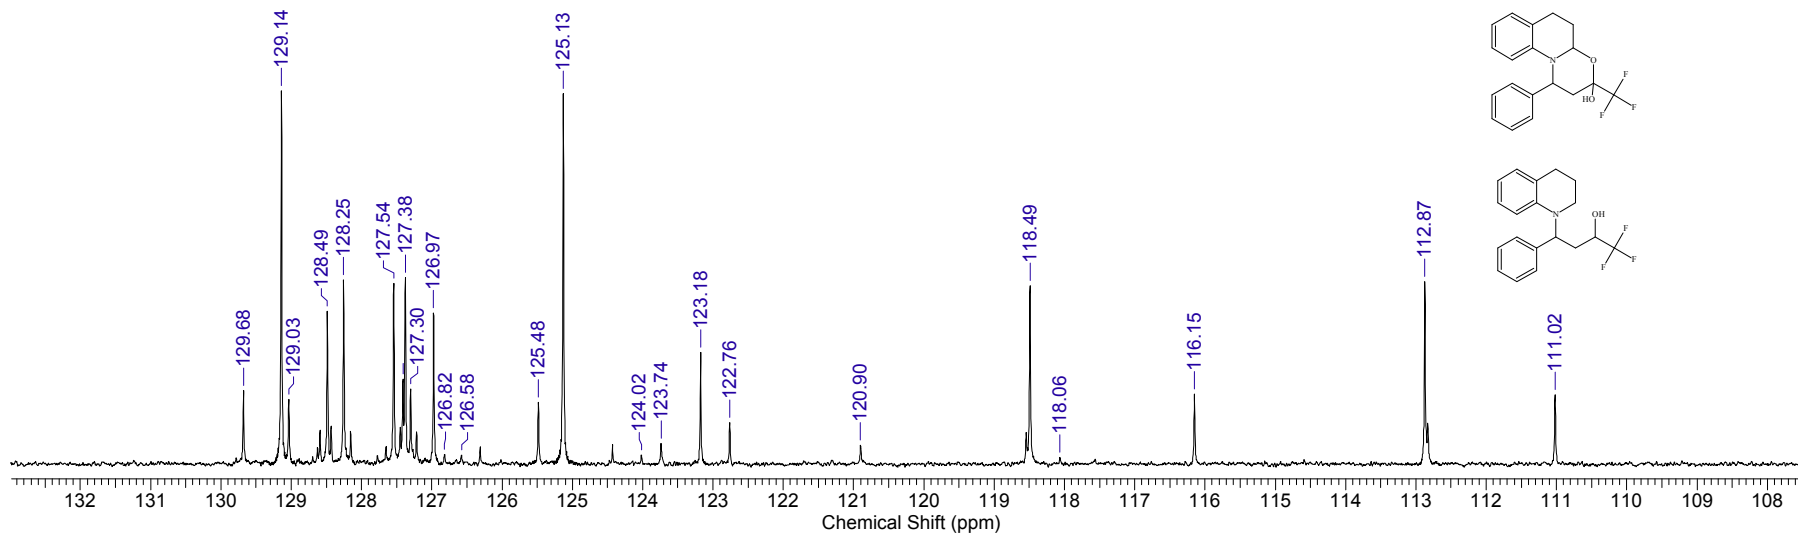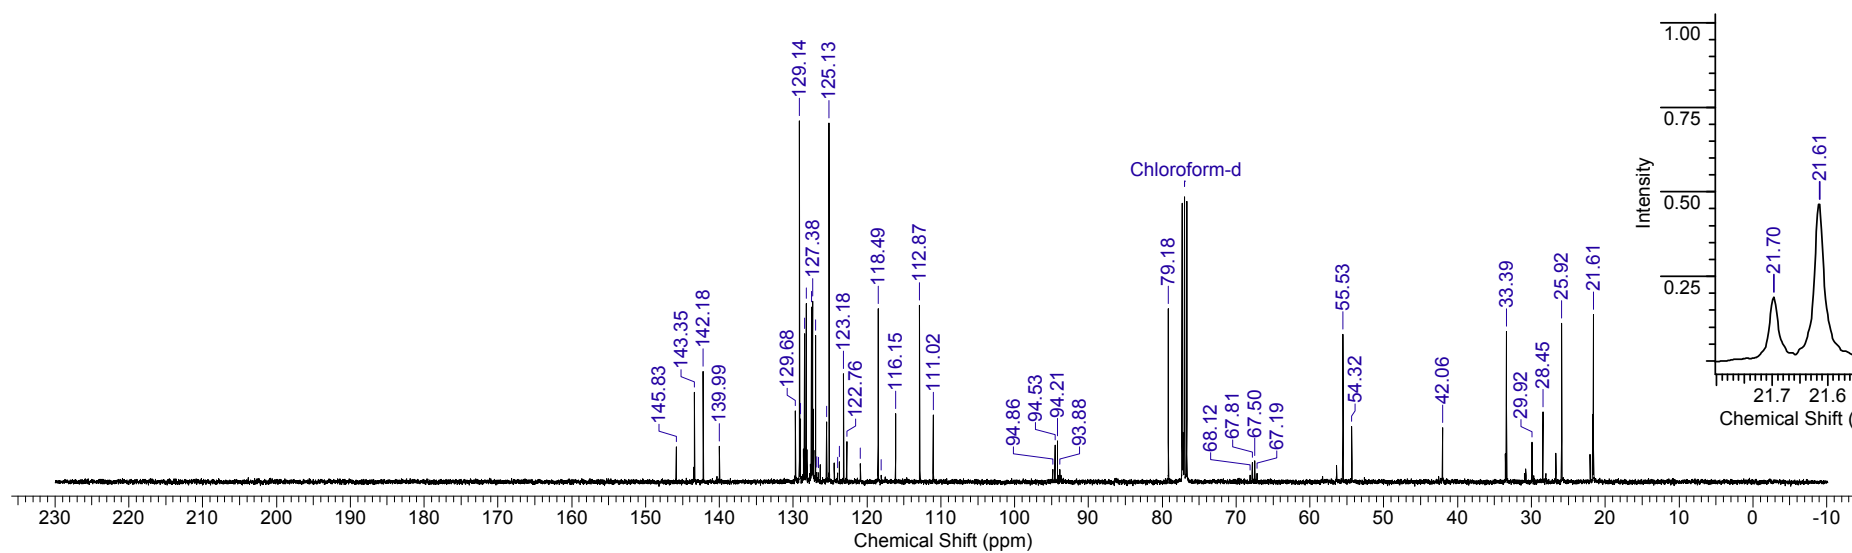

$^{13}\text{C}$  NMR spectrum of **8** and **9** (100.6 MHz,  $\text{CDCl}_3$ )

|                               |                                                     |                              |                      |                               |                      |
|-------------------------------|-----------------------------------------------------|------------------------------|----------------------|-------------------------------|----------------------|
| <b>Acquisition Time (sec)</b> | 1.3664                                              | <b>Comment</b>               | Imported from UXNMR. | <b>Date</b>                   | 30 Sep 2019 16:01:36 |
| <b>File Name</b>              | I:\SPEC_2019_H_C\09.nai öyáðú\BM-1716-2.APT_004001r | <b>Frequency (MHz)</b>       | 100.61               | <b>Nucleus</b>                | <sup>13</sup> C      |
| <b>Number of Transients</b>   | 49                                                  | <b>Original Points Count</b> | 32768                | <b>Points Count</b>           | 131072               |
| <b>Solvent</b>                | ACETONITRILE-D3                                     | <b>Sweep Width (Hz)</b>      | 23980.81             | <b>Pulse Sequence</b>         | jmod                 |
|                               |                                                     |                              |                      | <b>Temperature (degree C)</b> | 27.000               |

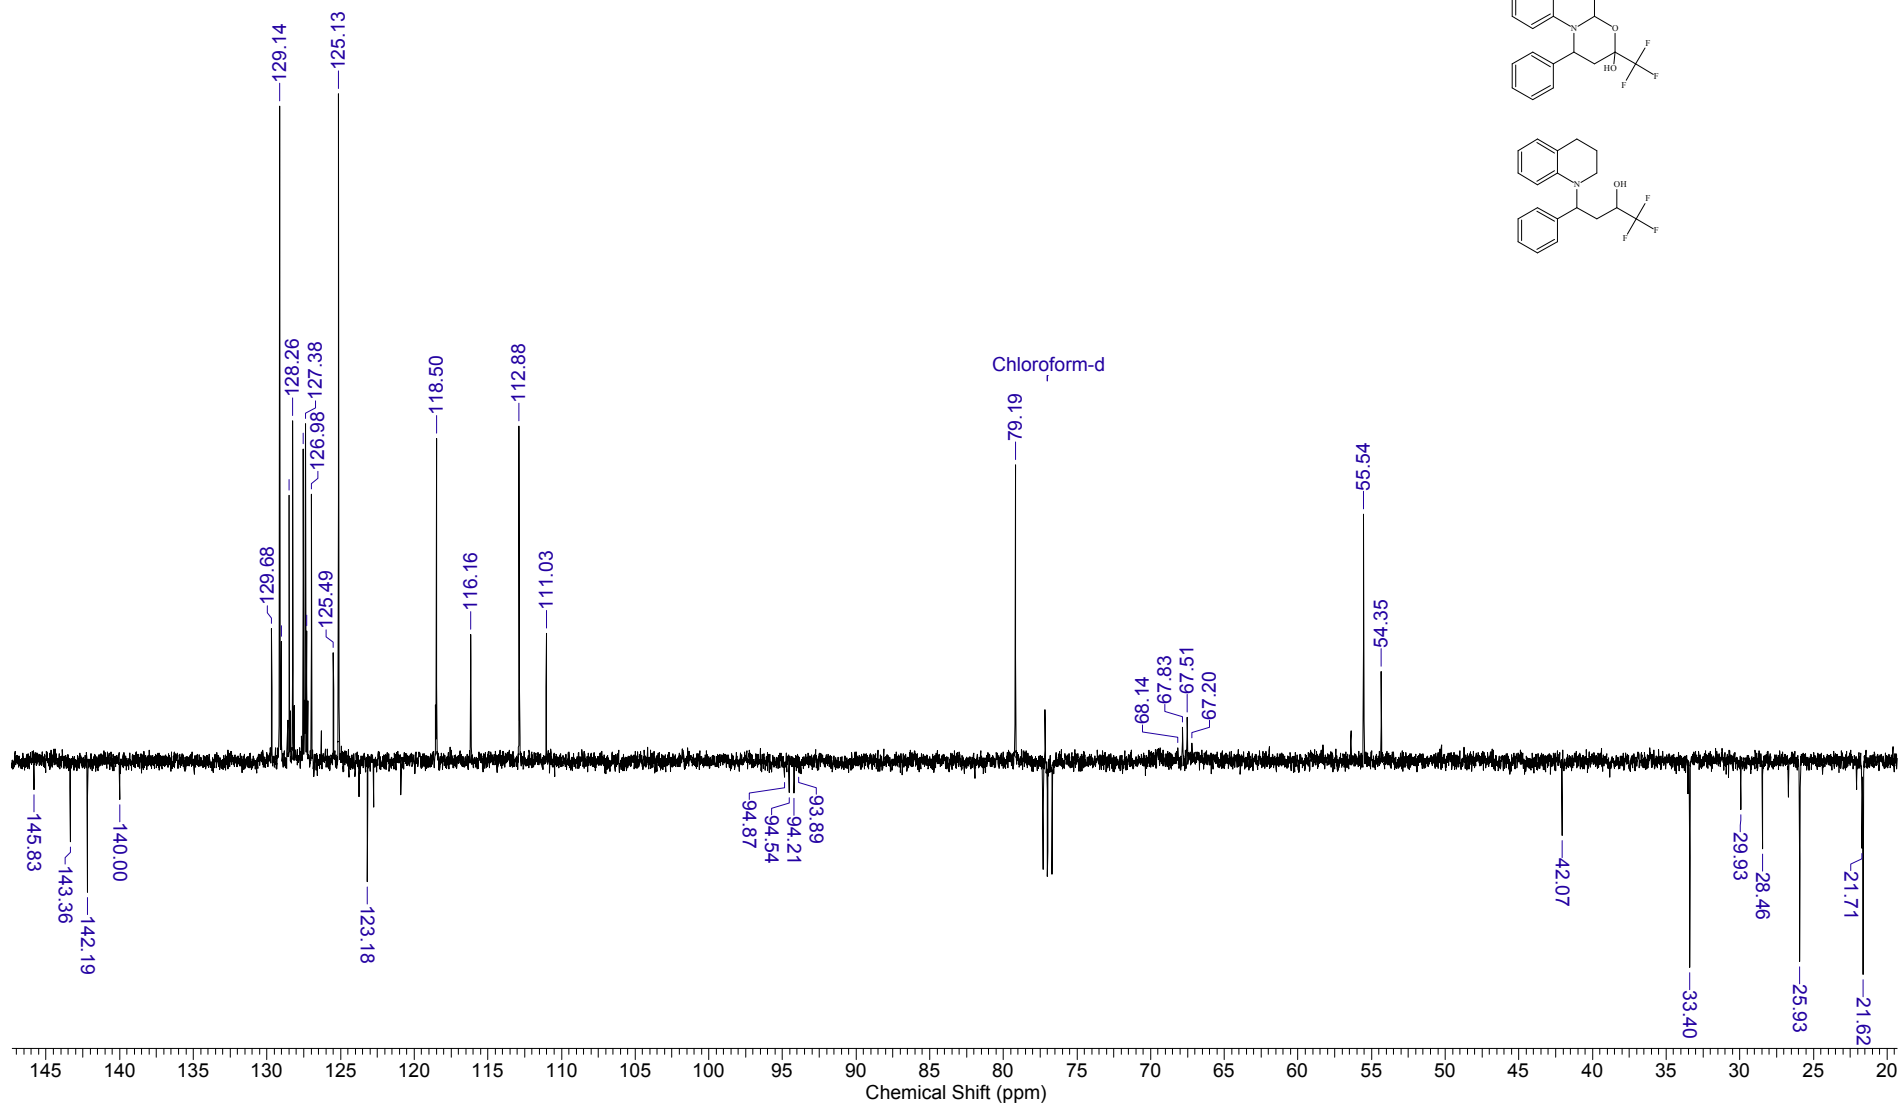

|                        |          |                        |             |                      |                                                                     |                       |       |
|------------------------|----------|------------------------|-------------|----------------------|---------------------------------------------------------------------|-----------------------|-------|
| Acquisition Time (sec) | 1.0000   | Date                   | Sep 20 2019 | File Name            | C:\DOCS\OUTPUT_301\F19\2019.09.20\BM-1709-R_20190920_01\FLUORINE_01 |                       |       |
| Frequency (MHz)        | 376.31   | Nucleus                | 19F         | Number of Transients | 8                                                                   | Original Points Count | 89286 |
| Points Count           | 131072   | Pulse Sequence         | s2pul       | Solvent              | CHLOROFORM-D                                                        |                       |       |
| Sweep Width (Hz)       | 89285.71 | Temperature (degree C) | 20.000      |                      |                                                                     |                       |       |

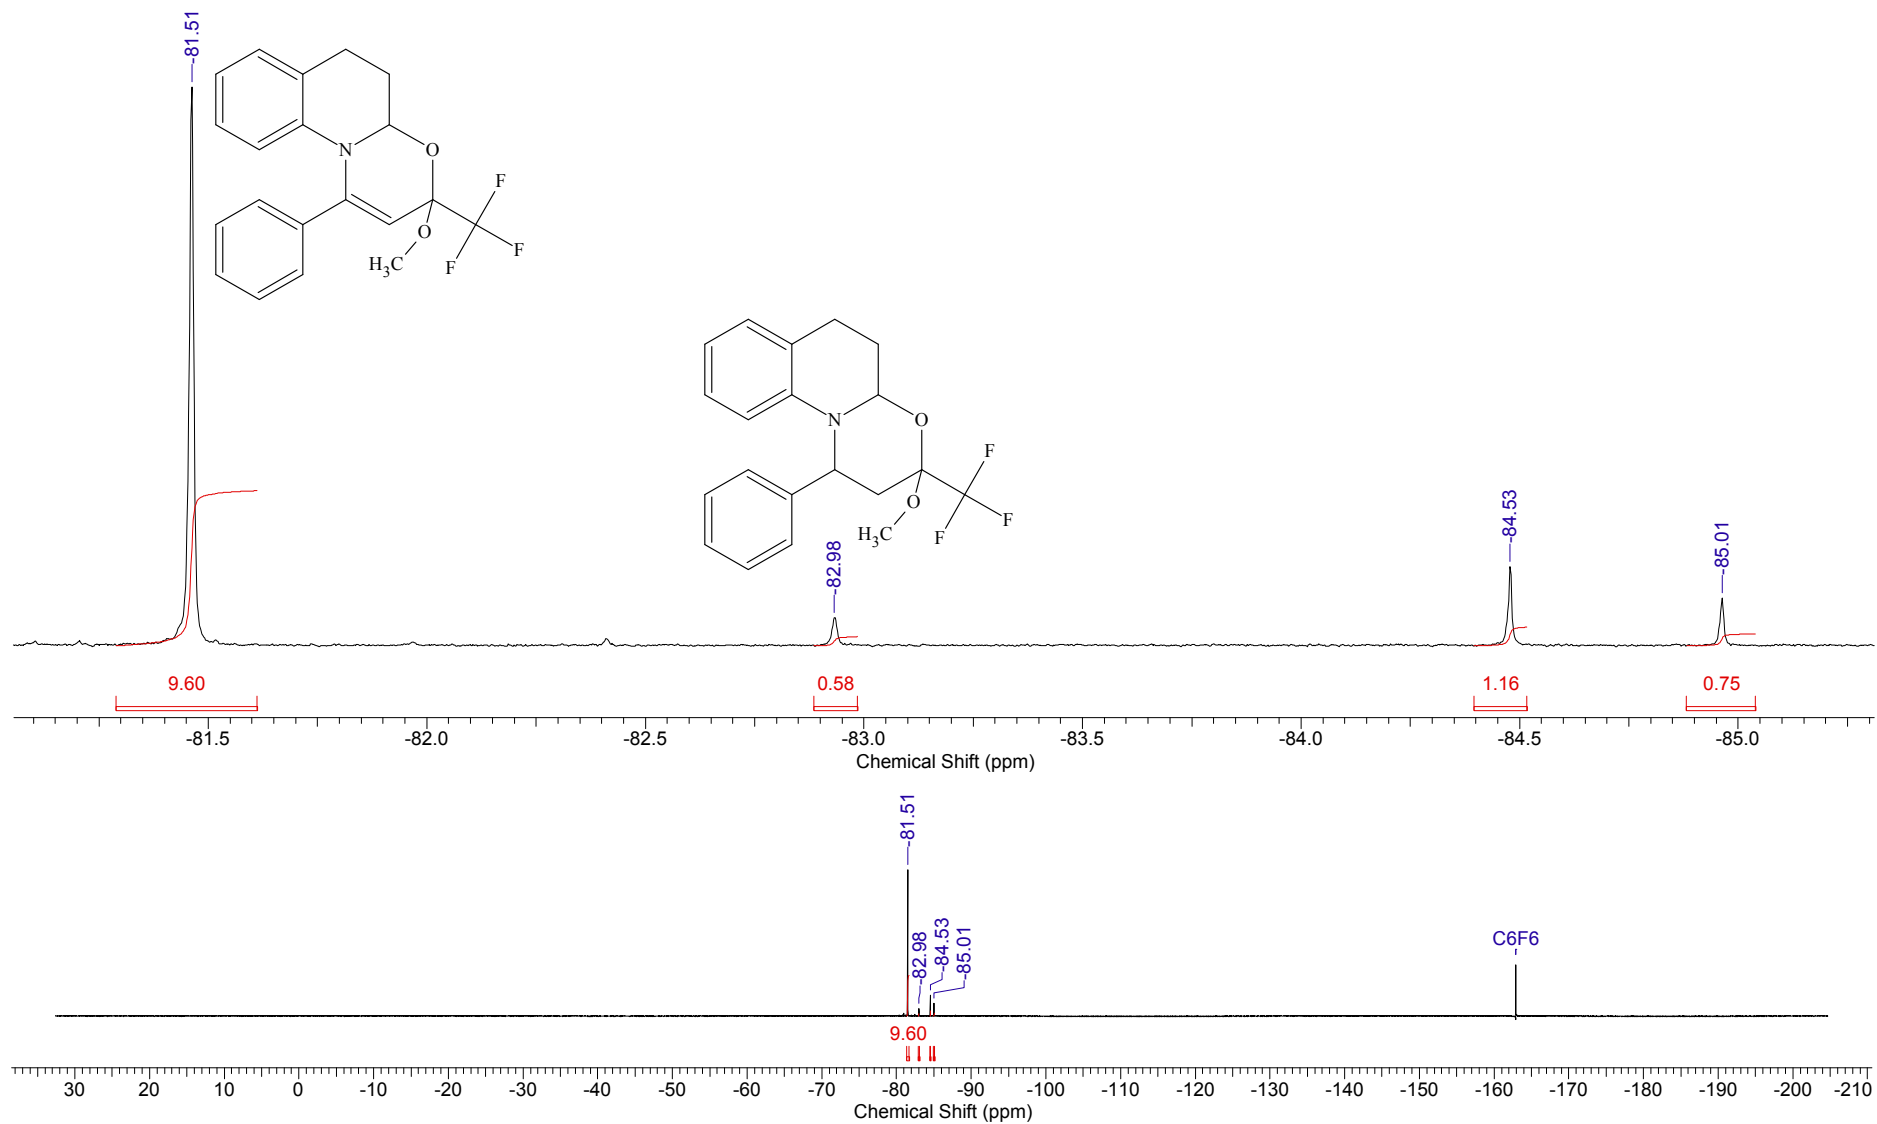

$^{19}\text{F}$  NMR monitoring of hydrogenation of 3a in MeOH. Spectrum of the reaction mixture after first 14 h (376.5 MHz  $\text{CDCl}_3$ )

|                               |                                       |                               |                      |                       |             |                             |              |
|-------------------------------|---------------------------------------|-------------------------------|----------------------|-----------------------|-------------|-----------------------------|--------------|
| <b>Acquisition Time (sec)</b> | 4.0894                                | <b>Comment</b>                | Imported from UXMNR. |                       | <b>Date</b> | 28 Sep 2019 16:54:48        |              |
| <b>File Name</b>              | C:\DOCS\BMBM-1709-f\BM-1709-f_001001r | <b>Frequency (MHz)</b>        | 400.13               | <b>Nucleus</b>        | 1H          | <b>Number of Transients</b> | 8            |
| <b>Original Points Count</b>  | 32768                                 | <b>Points Count</b>           | 131072               | <b>Pulse Sequence</b> | zq30        | <b>Solvent</b>              | CHLOROFORM-D |
| <b>Sweep Width (Hz)</b>       | 8012.82                               | <b>Temperature (degree C)</b> | 27.000               |                       |             |                             |              |

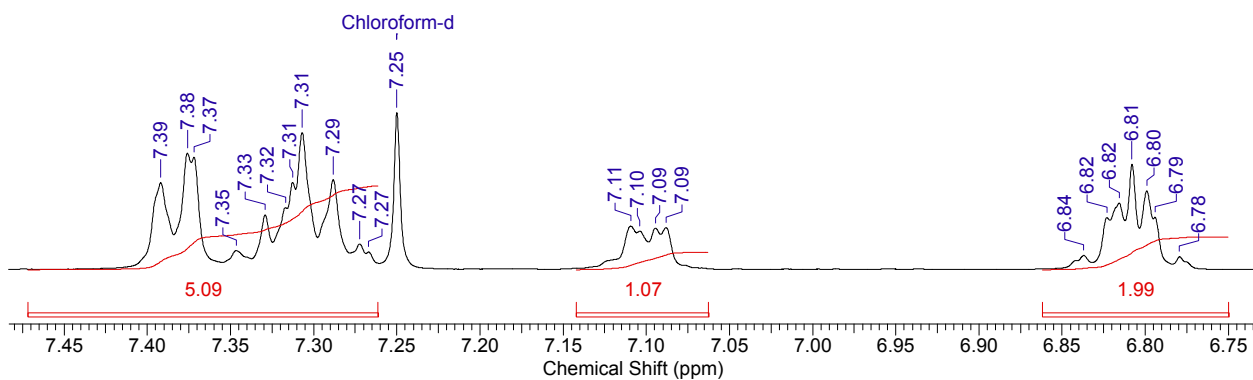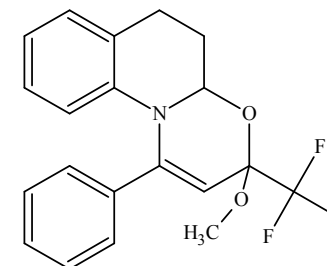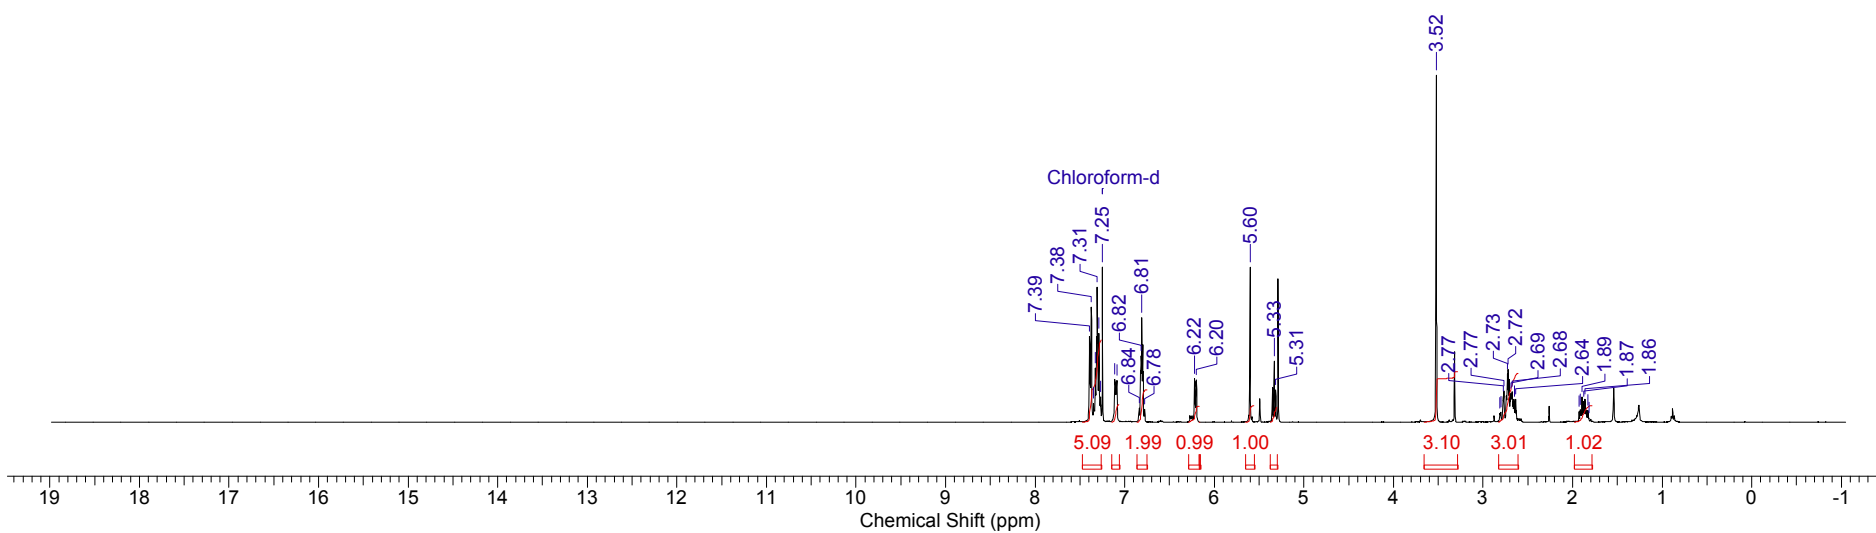

<sup>1</sup>H NMR spectrum of **10** (400.1 MHz, CDCl<sub>3</sub>)

|                               |          |                               |             |                             |                                                                     |                              |        |
|-------------------------------|----------|-------------------------------|-------------|-----------------------------|---------------------------------------------------------------------|------------------------------|--------|
| <b>Acquisition Time (sec)</b> | 2.0000   | <b>Date</b>                   | Sep 30 2019 | <b>File Name</b>            | C:\DOCS\OUTPUT_301\F19\2019.09.30\BM-1709-F_20190930_01\FLUORINE_01 |                              |        |
| <b>Frequency (MHz)</b>        | 376.31   | <b>Nucleus</b>                | 19F         | <b>Number of Transients</b> | 16                                                                  | <b>Original Points Count</b> | 178571 |
| <b>Points Count</b>           | 262144   | <b>Pulse Sequence</b>         | s2pul       | <b>Solvent</b>              | CHLOROFORM-D                                                        |                              |        |
| <b>Sweep Width (Hz)</b>       | 89285.71 | <b>Temperature (degree C)</b> | 20.000      |                             |                                                                     |                              |        |

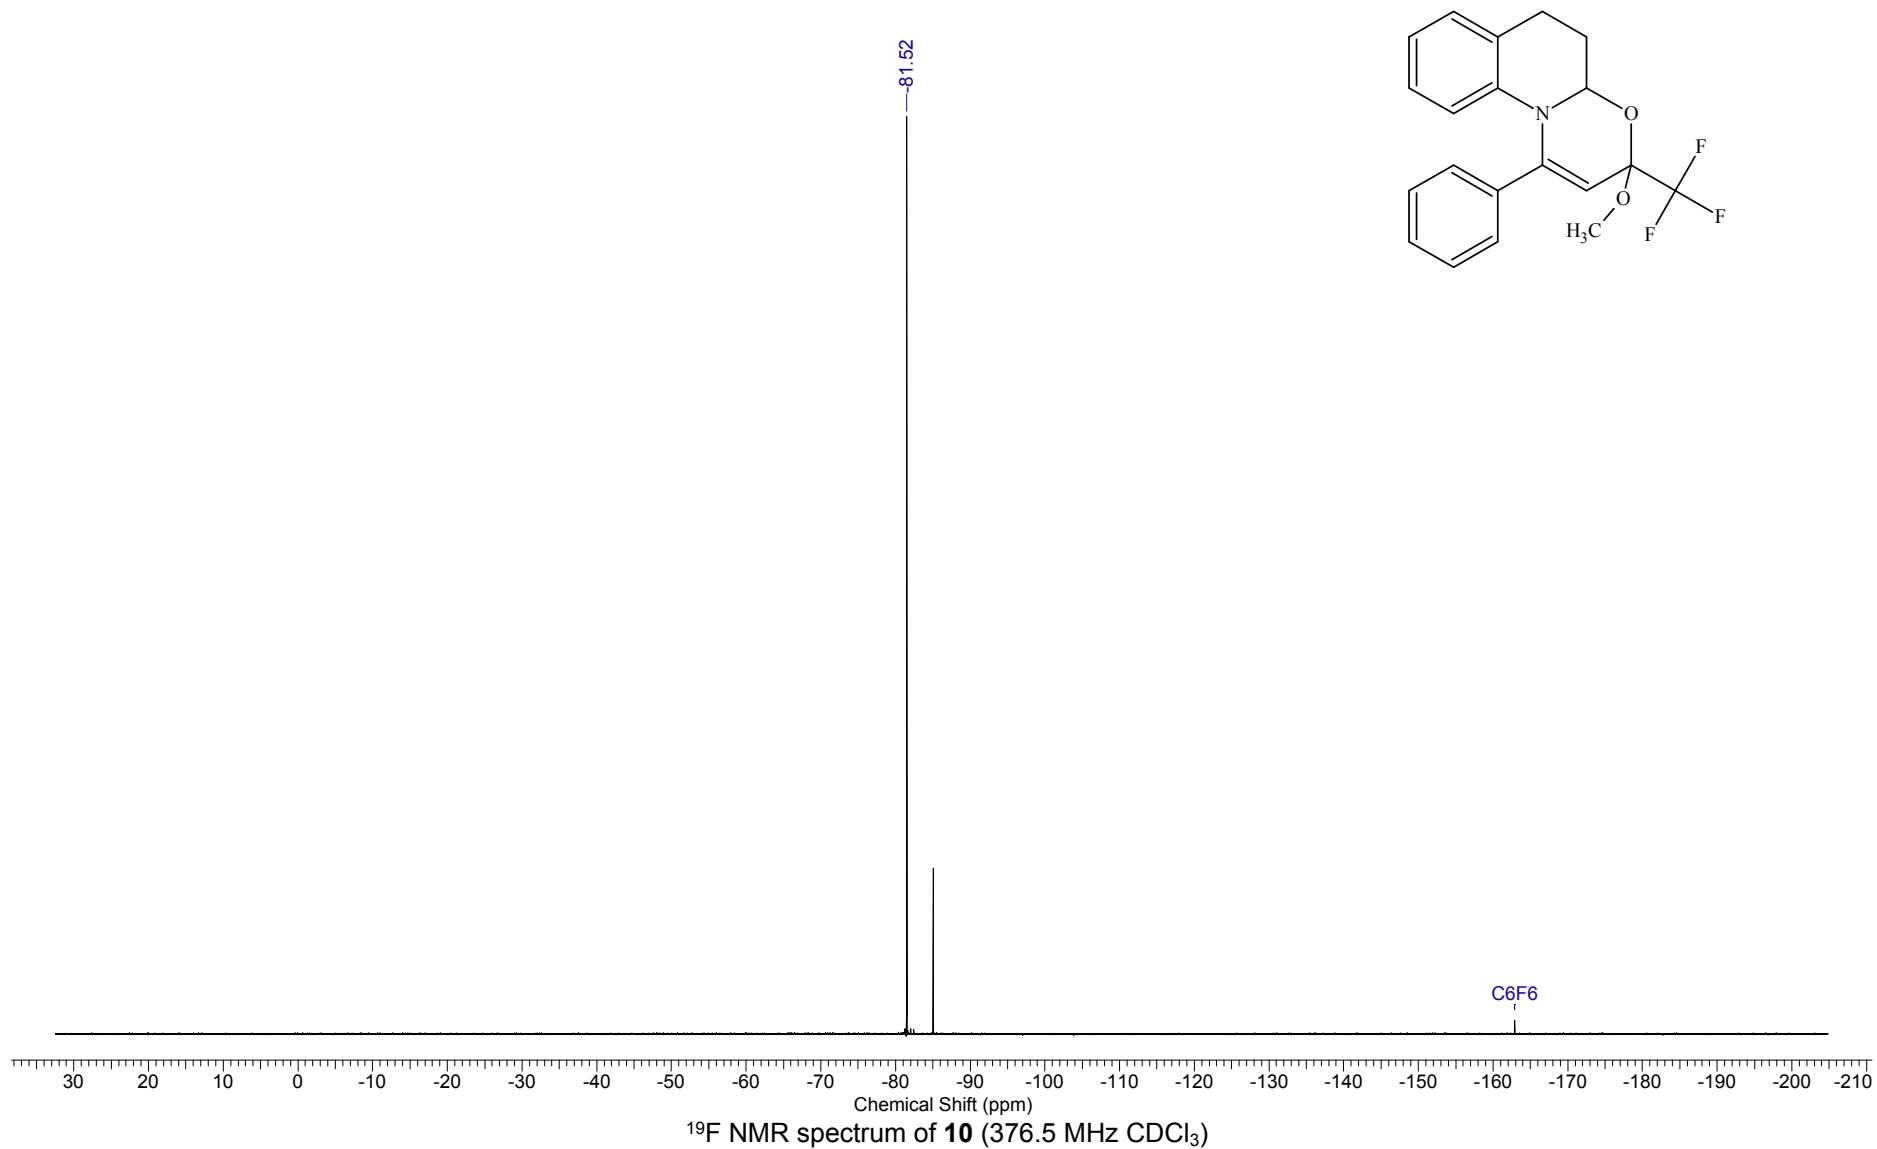

|                               |                                                   |                              |                      |                               |                      |
|-------------------------------|---------------------------------------------------|------------------------------|----------------------|-------------------------------|----------------------|
| <b>Acquisition Time (sec)</b> | 0.6783                                            | <b>Comment</b>               | Imported from UXMNR. | <b>Date</b>                   | 30 Sep 2019 15:45:06 |
| <b>File Name</b>              | I:\SPEC_2019_H.C\09.ñáí öyáðú\BM-1709-F.C_002001r | <b>Frequency (MHz)</b>       | 100.61               | <b>Nucleus</b>                | 13C                  |
| <b>Number of Transients</b>   | 161                                               | <b>Original Points Count</b> | 16384                | <b>Points Count</b>           | 131072               |
| <b>Solvent</b>                | CHLOROFORM-D                                      | <b>Sweep Width (Hz)</b>      | 24154.59             | <b>Pulse Sequence</b>         | zgpg30               |
|                               |                                                   |                              |                      | <b>Temperature (degree C)</b> | 27.000               |

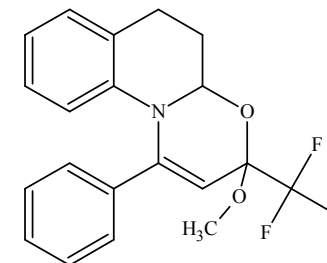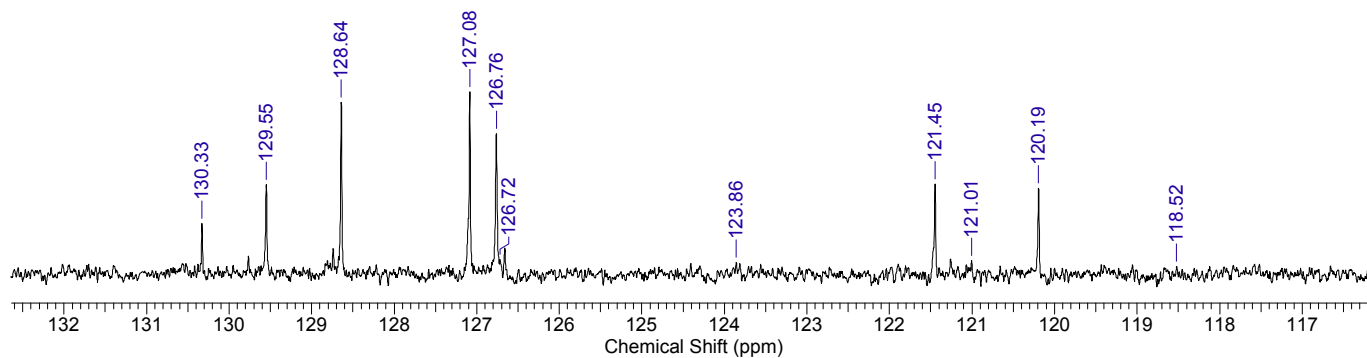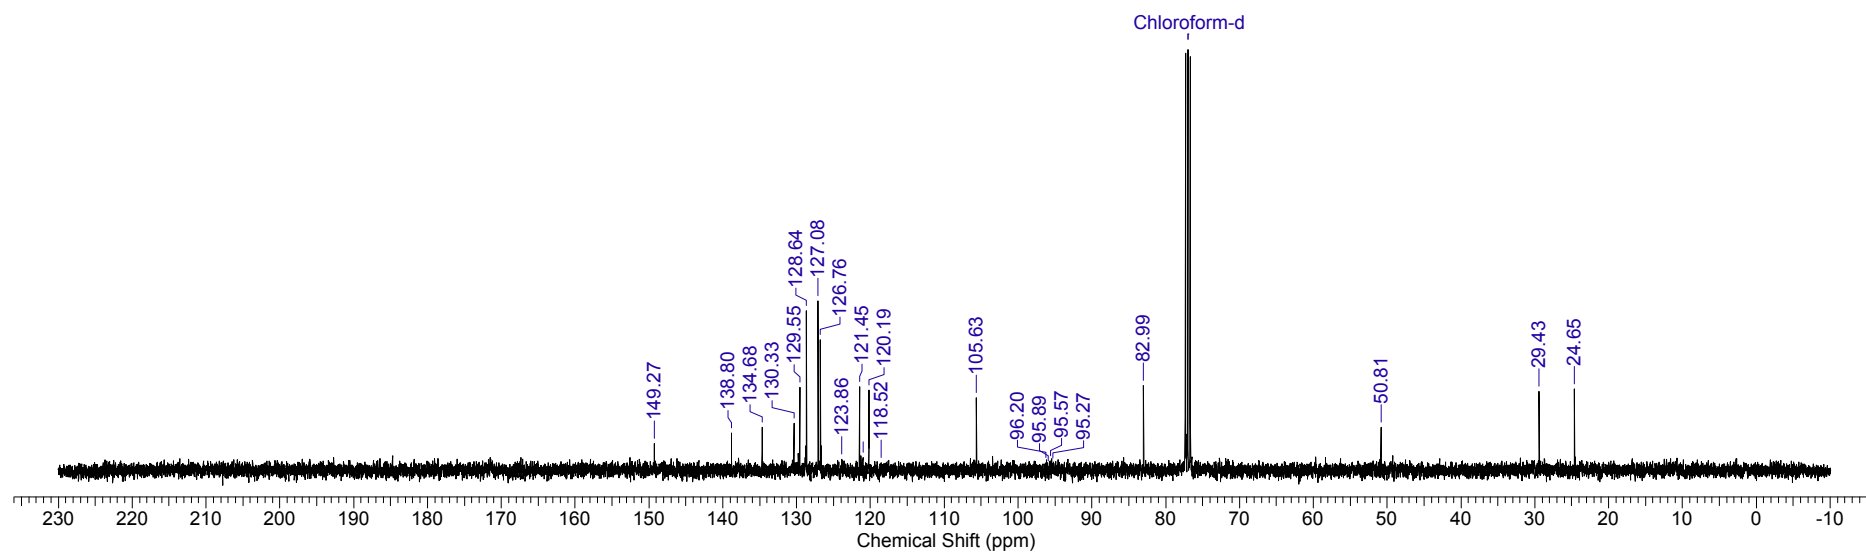

$^{13}\text{C}$  NMR spectrum of **10** (100.6 MHz,  $\text{CDCl}_3$ )

|                               |                                                             |                             |                      |                              |                      |
|-------------------------------|-------------------------------------------------------------|-----------------------------|----------------------|------------------------------|----------------------|
| <b>Acquisition Time (sec)</b> | 1.3664                                                      | <b>Comment</b>              | Imported from UXNMR. | <b>Date</b>                  | 30 Sep 2019 15:49:36 |
| <b>File Name</b>              | C:\DOCS\OUTPUT_301\2019\09\flai öyääü\BM-1709-F.APT_004001r |                             |                      | <b>Frequency (MHz)</b>       | 100.61               |
| <b>Nucleus</b>                | 13C                                                         | <b>Number of Transients</b> | 33                   | <b>Original Points Count</b> | 32768                |
| <b>Pulse Sequence</b>         | jmod                                                        | <b>Solvent</b>              | ACETONITRILE-D3      | <b>Points Count</b>          | 131072               |
| <b>Temperature (degree C)</b> | 27.000                                                      |                             |                      | <b>Sweep Width (Hz)</b>      | 23980.81             |

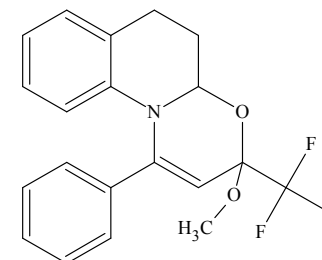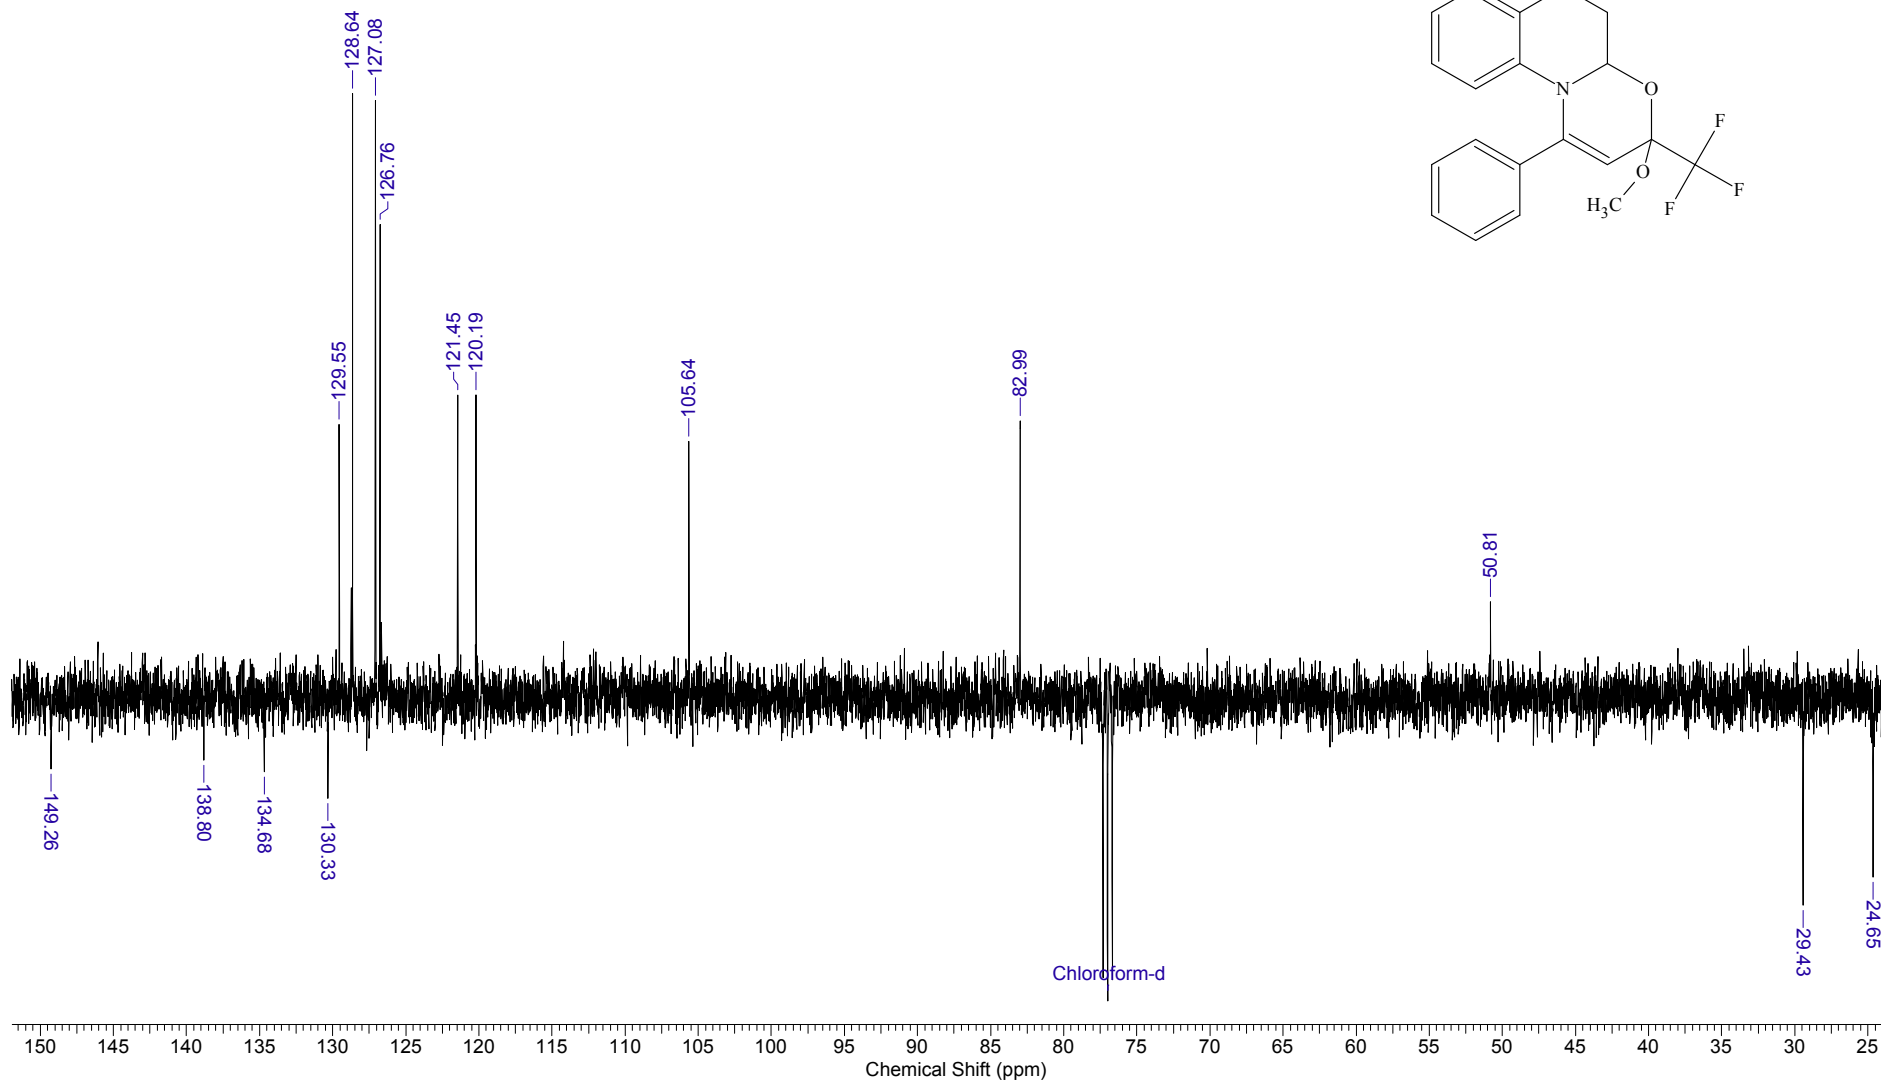

|                               |                                                          |                             |                      |                              |                      |
|-------------------------------|----------------------------------------------------------|-----------------------------|----------------------|------------------------------|----------------------|
| <b>Acquisition Time (sec)</b> | 4.0894                                                   | <b>Comment</b>              | Imported from UXMNR. | <b>Date</b>                  | 27 Sep 2019 15:28:36 |
| <b>File Name</b>              | C:\DOCS\OUTPUT_301\2019\09\ñáí òyáðù\BM-1709-K.H_001001r |                             |                      | <b>Frequency (MHz)</b>       | 400.13               |
| <b>Nucleus</b>                | 1H                                                       | <b>Number of Transients</b> | 4                    | <b>Original Points Count</b> | 32768                |
| <b>Pulse Sequence</b>         | zg30                                                     | <b>Solvent</b>              | CHLOROFORM-D         | <b>Points Count</b>          | 131072               |
| <b>Temperature (degree C)</b> | 27.000                                                   |                             |                      | <b>Sweep Width (Hz)</b>      | 8012.82              |

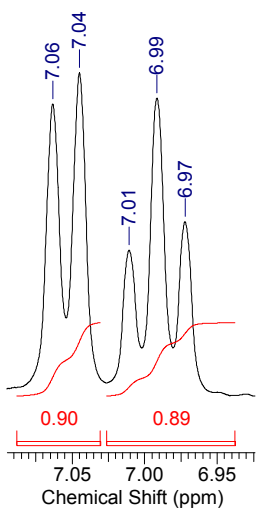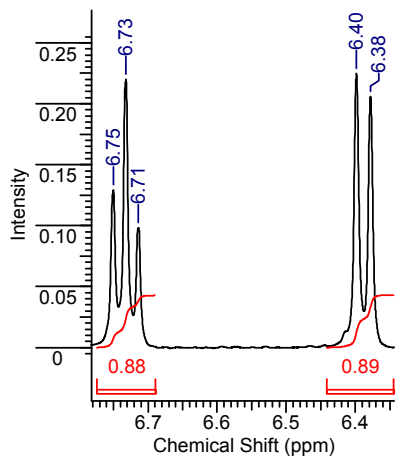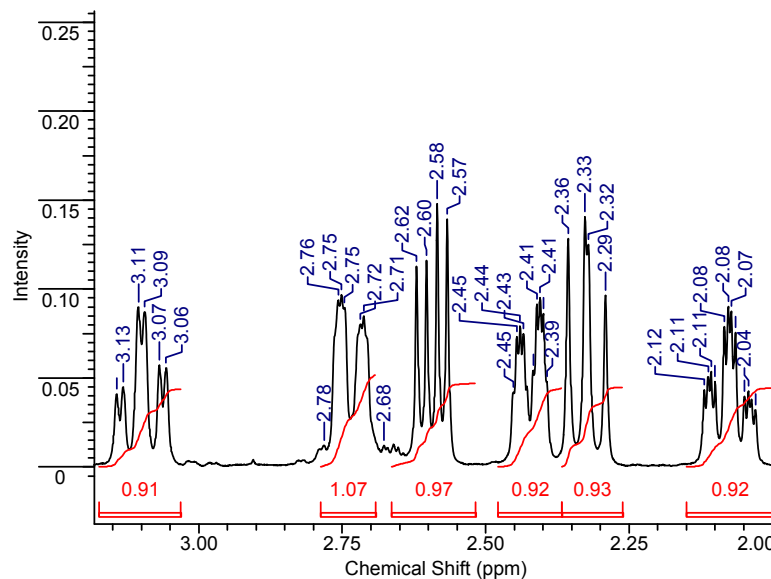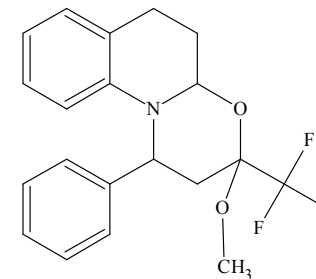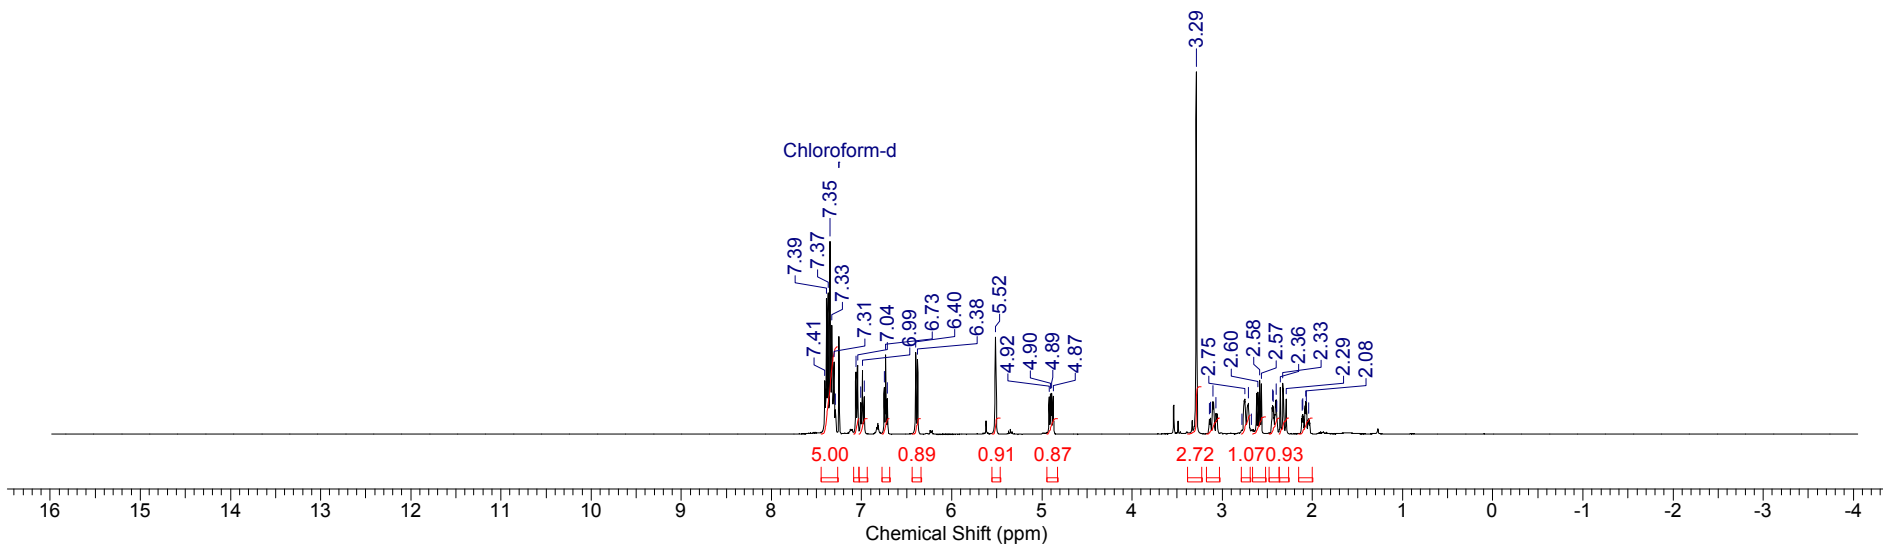

<sup>1</sup>H NMR spectrum of **11** (400.1 MHz, CDCl<sub>3</sub>)



|                               |          |                               |             |                             |                                                                     |                              |       |
|-------------------------------|----------|-------------------------------|-------------|-----------------------------|---------------------------------------------------------------------|------------------------------|-------|
| <b>Acquisition Time (sec)</b> | 1.0000   | <b>Date</b>                   | Sep 27 2019 | <b>File Name</b>            | C:\DOCS\OUTPUT_301\F19\2019.09.27\BM-1709-K_20190927_01\FLUORINE_01 |                              |       |
| <b>Frequency (MHz)</b>        | 376.31   | <b>Nucleus</b>                | 19F         | <b>Number of Transients</b> | 4                                                                   | <b>Original Points Count</b> | 89286 |
| <b>Points Count</b>           | 131072   | <b>Pulse Sequence</b>         | s2pul       | <b>Solvent</b>              | CHLOROFORM-D                                                        |                              |       |
| <b>Sweep Width (Hz)</b>       | 89285.71 | <b>Temperature (degree C)</b> | 20.000      |                             |                                                                     |                              |       |

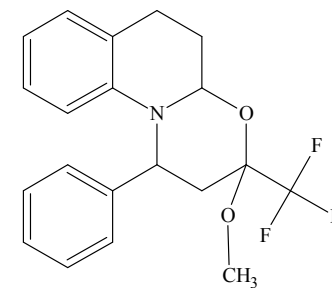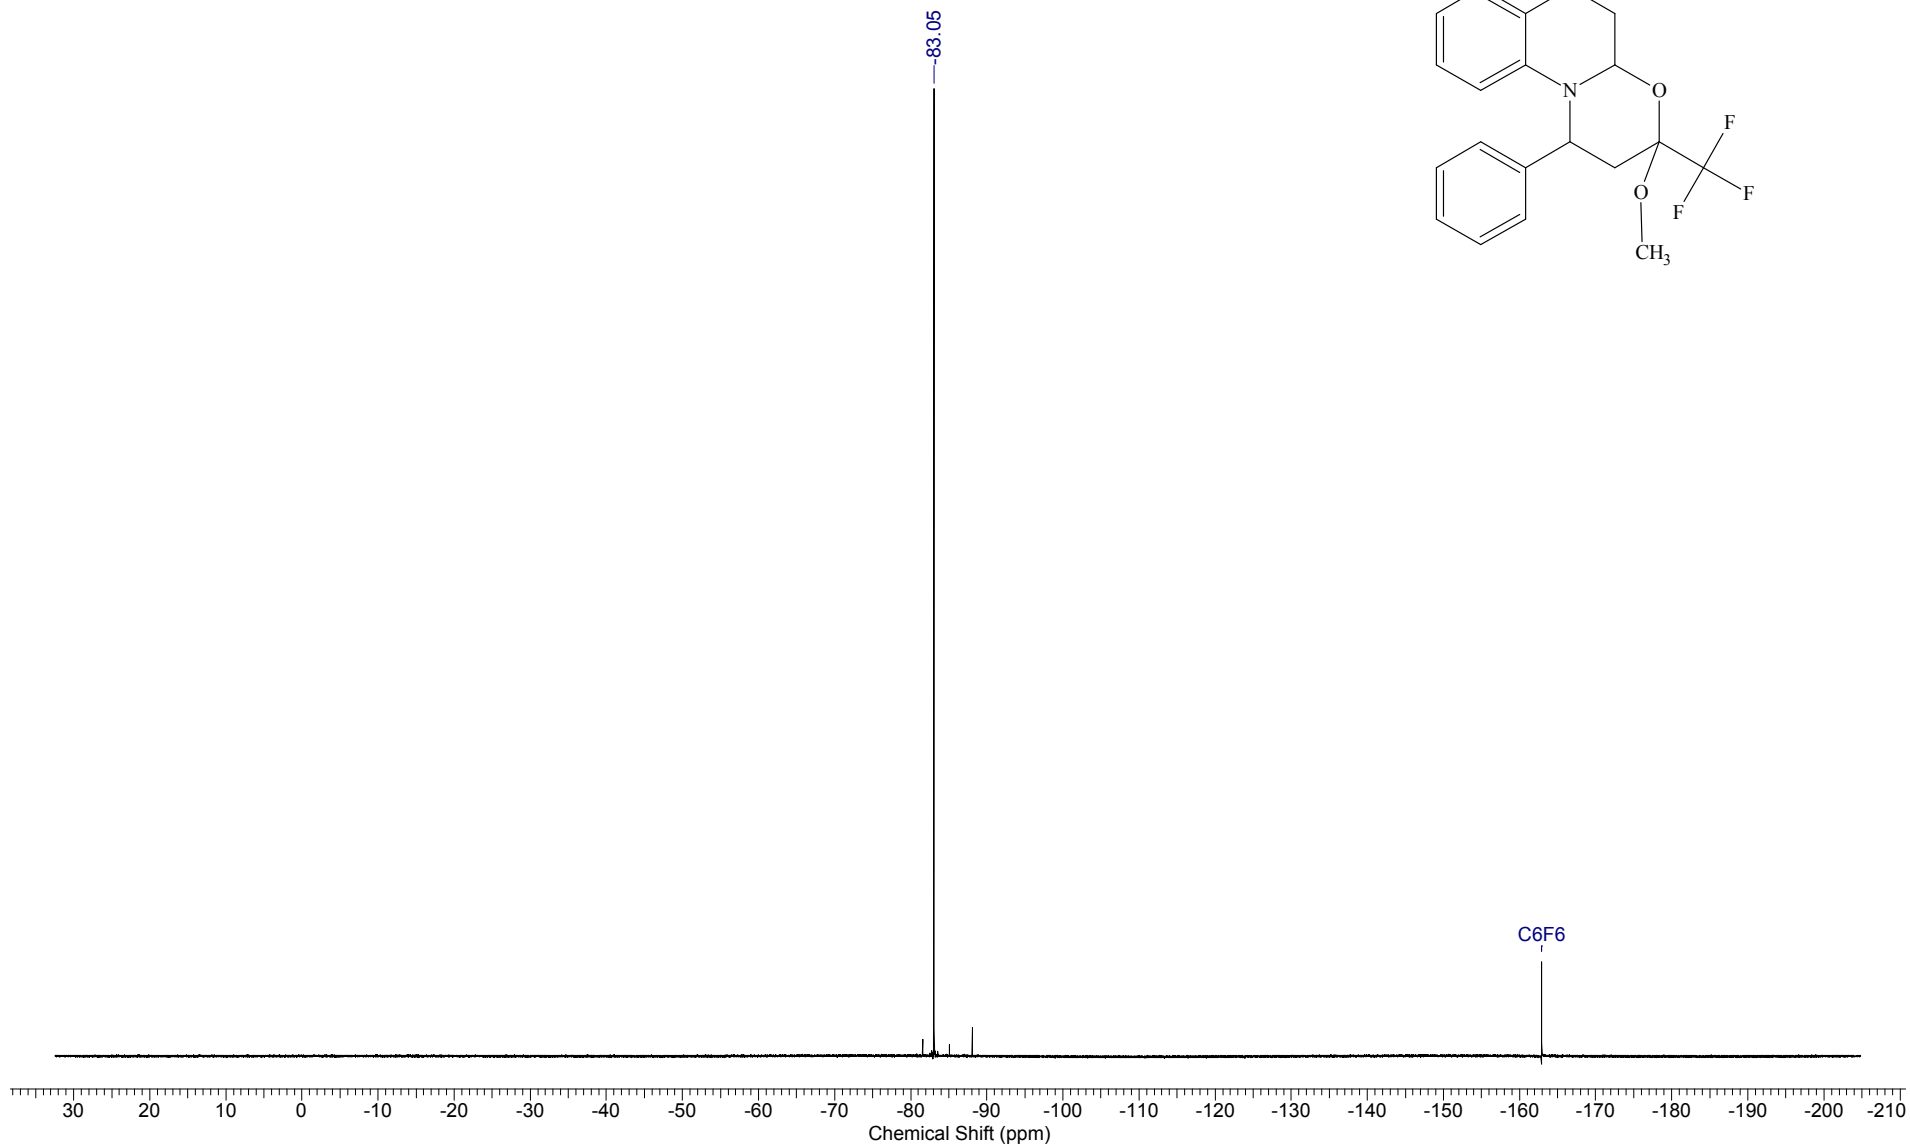

<sup>19</sup>F NMR spectrum of **11** (376.5 MHz CDCl<sub>3</sub>)

|                               |                                                           |                             |                      |                              |                      |
|-------------------------------|-----------------------------------------------------------|-----------------------------|----------------------|------------------------------|----------------------|
| <b>Acquisition Time (sec)</b> | 0.6783                                                    | <b>Comment</b>              | Imported from UXNMR. | <b>Date</b>                  | 27 Sep 2019 15:38:00 |
| <b>File Name</b>              | C:\DOCS\OUTPUT_301\2019\09.říáí òýááú\BM-1709-K.C_002001r | <b>Frequency (MHz)</b>      | 100.61               | <b>Points Count</b>          | 131072               |
| <b>Nucleus</b>                | <sup>13</sup> C                                           | <b>Number of Transients</b> | 233                  | <b>Original Points Count</b> | 16384                |
| <b>Pulse Sequence</b>         | zgpg30                                                    | <b>Solvent</b>              | CHLOROFORM-D         | <b>Sweep Width (Hz)</b>      | 24154.59             |
| <b>Temperature (degree C)</b> | 27.000                                                    |                             |                      |                              |                      |

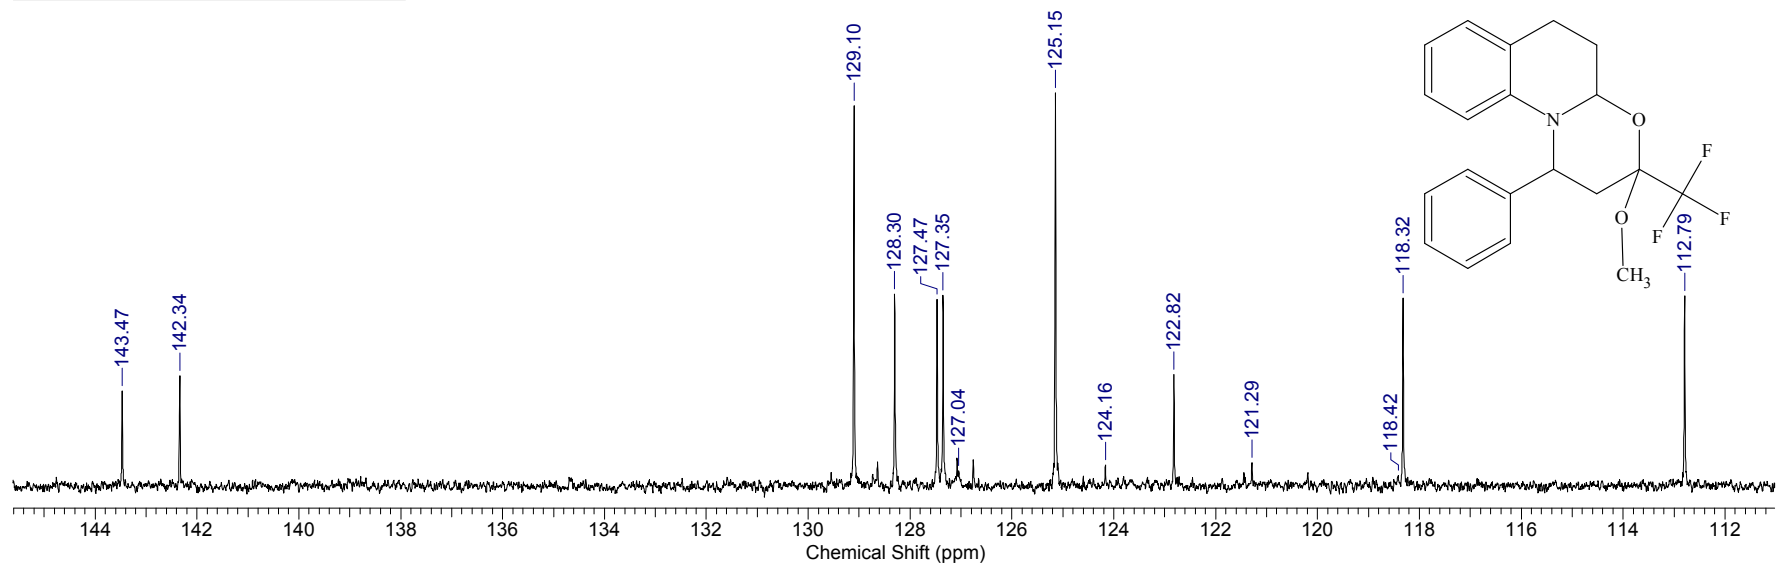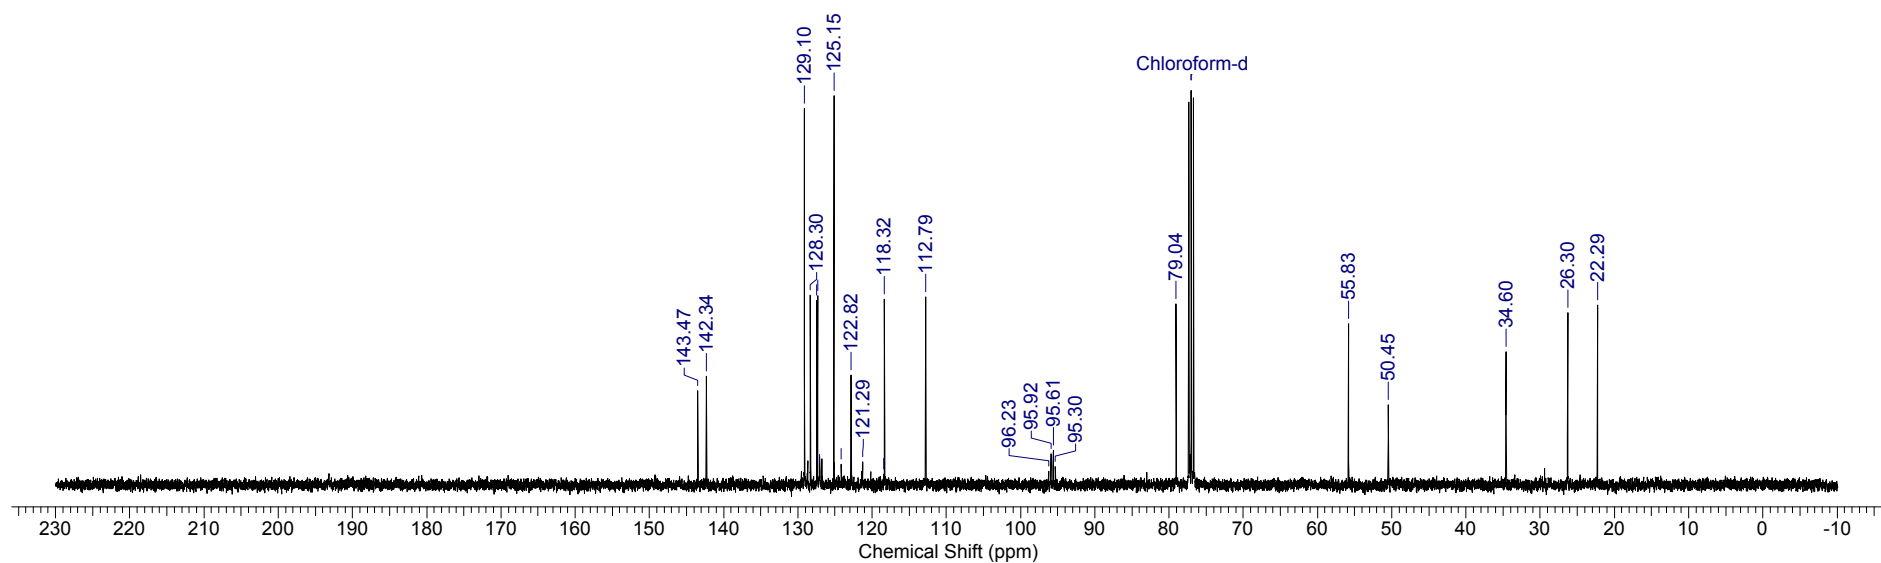

<sup>13</sup>C NMR spectrum of **11** (100.6 MHz, CDCl<sub>3</sub>)

|                               |                                                            |                             |                      |                              |                      |
|-------------------------------|------------------------------------------------------------|-----------------------------|----------------------|------------------------------|----------------------|
| <b>Acquisition Time (sec)</b> | 1.3664                                                     | <b>Comment</b>              | Imported from UXNMR. | <b>Date</b>                  | 30 Sep 2019 15:55:04 |
| <b>File Name</b>              | C:\DOCS\OUTPUT_301\2019\09\ñáí òyáðù\BM-1709-R.APT_004001r |                             |                      | <b>Frequency (MHz)</b>       | 100.61               |
| <b>Nucleus</b>                | <sup>13</sup> C                                            | <b>Number of Transients</b> | 34                   | <b>Original Points Count</b> | 32768                |
| <b>Pulse Sequence</b>         | jmod                                                       | <b>Solvent</b>              | ACETONITRILE-D3      | <b>Points Count</b>          | 131072               |
| <b>Temperature (degree C)</b> | 27.000                                                     |                             |                      | <b>Sweep Width (Hz)</b>      | 23980.81             |

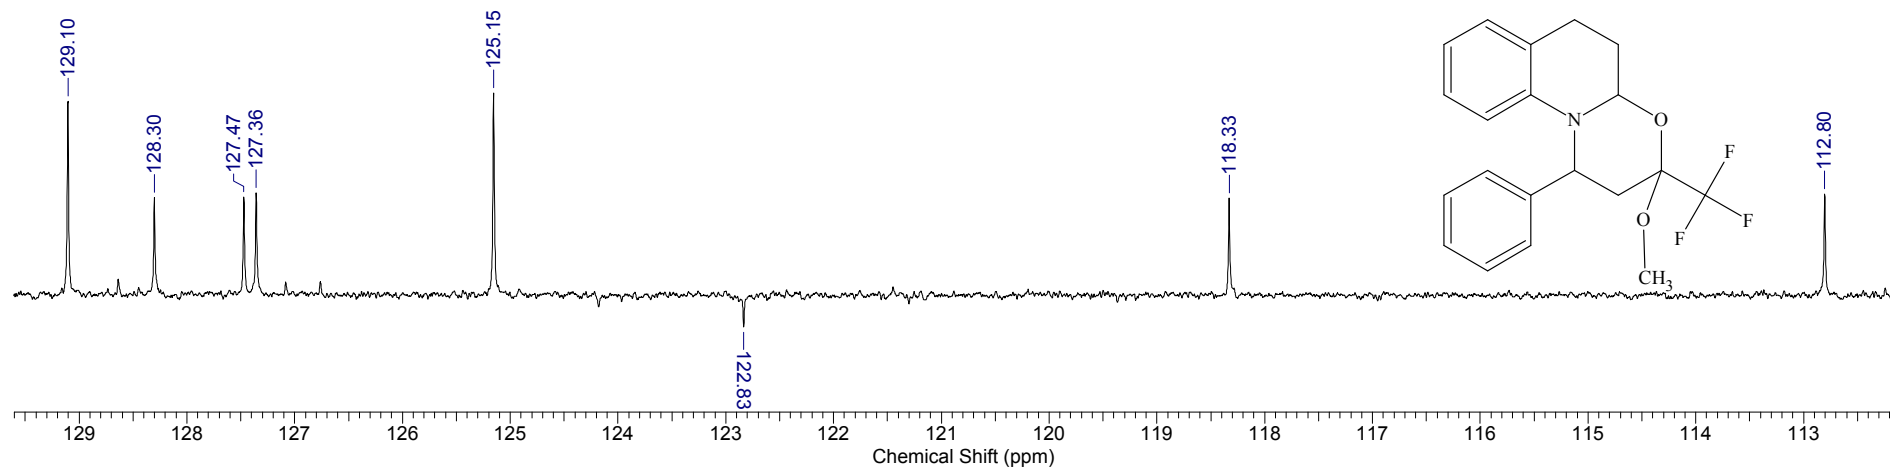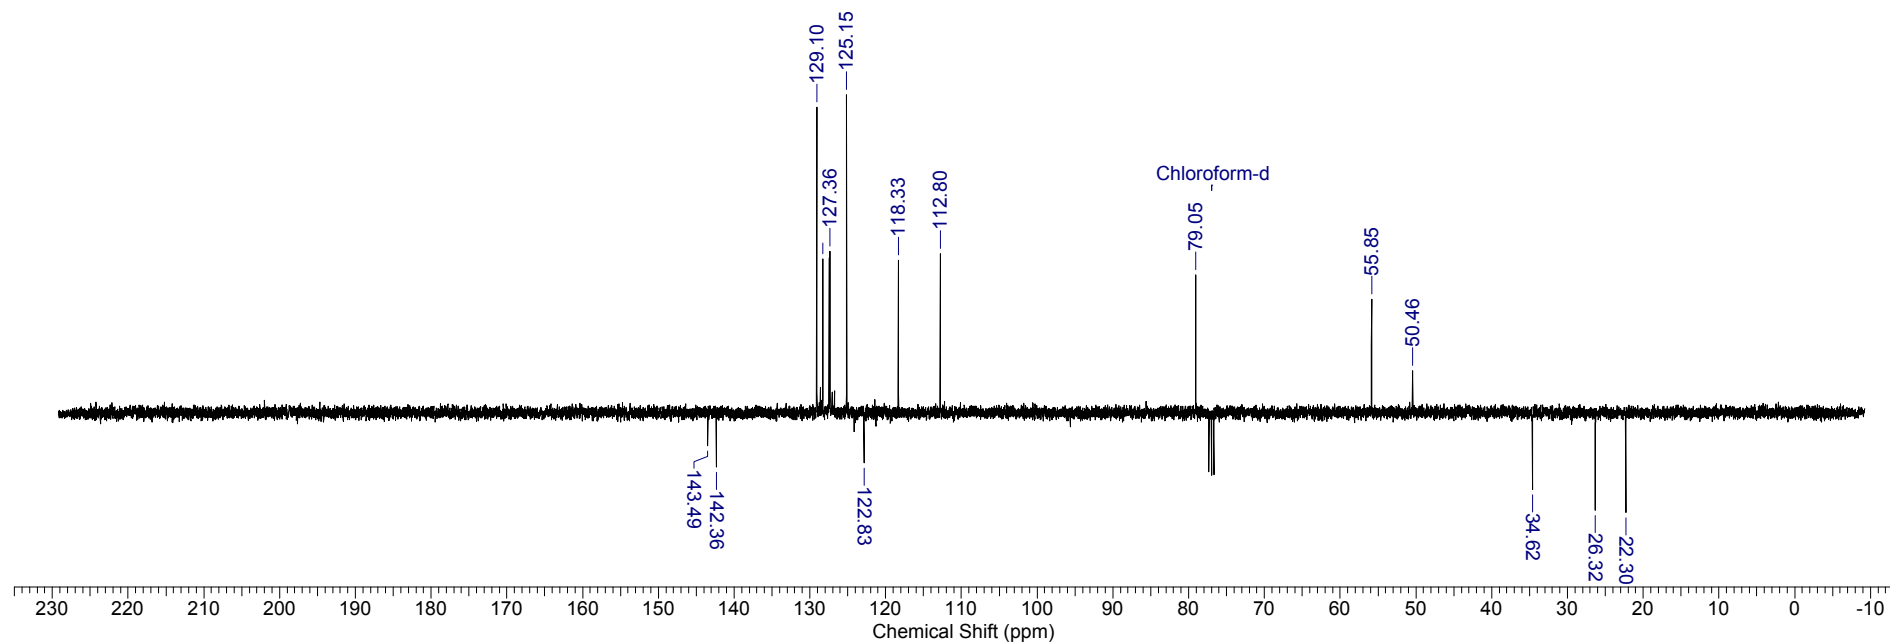

<sup>13</sup>C APT NMR spectrum of **11** (100.6 MHz, CDCl<sub>3</sub>)
